# Supplementary material for: Rheumatoid Arthritis Patients, Both Newly Diagnosed and Methotrexate Treated, Show More DNA Methylation Differences in CD4+ Memory Than in CD4+ Naïve T Cells
Source: Front Immunol. 2020 Feb 14;11:194. doi: 10.3389/fimmu.2020.00194 (PMC7033478; doi:10.3389/fimmu.2020.00194)
Supplement: Supplementary file 3 [file Table_3.xlsx]

## Sheet: DMPs
Table 3_v1
Test	Cell.type	Chromosome	Start	End	Width	CpG	GC	CGI.Relation	SNPs	HumanMethylation27	HumanMethylation450	MethylationEPIC	Mean.Ctr	Mean.RA	Mean.diff	Mean.quot.log2	Diffmeth.p.val	Max.Ctr	Min.Ctr	Sd.Ctr	Max.RA	Min.RA	Sd.RA	Min.diff	Diffmeth.p.adj.fdr	CombinedRank	Num.na.Ctr	Num.na.RA	Mean.covg.Ctr	Mean.covg.RA	Min.covg.Ctr	Min.covg.RA	Max.covg.Ctr	Max.covg.RA	Nsamples.covg.thres10.Ctr	Nsamples.covg.thres10.RA	Annot.seqnames	Annot.start	Annot.end	Annot.width	Annot.strand	Annot.id	Annot.tx_id	Annot.gene_id	Annot.symbol	Annot.type	TSS_dist
AR_ctr	CD4 mem	chr7	124426158	124426158	1	2	42	Open Sea	NA	NA	NA	NA	0.81215	0.878175	-0.066025	-0.111442	1.08e-10	0.928571	0.611111	0.125995	1	0.653061	0.0905031	0	3.01e-07	1760782	2	2	21.7143	29.2778	0	0	69	72	5	14	chr7	124422131	124427869	5739	-	intron:258573	uc003vlj.2	154872	C7orf77	hg19_genes_introns	143792
AR_ctr	CD4 mem	chr7	124426158	124426158	1	2	42	Open Sea	NA	NA	NA	NA	0.81215	0.878175	-0.066025	-0.111442	1.08e-10	0.928571	0.611111	0.125995	1	0.653061	0.0905031	0	3.01e-07	1760782	2	2	21.7143	29.2778	0	0	69	72	5	14	chr7	124410190	124565882	155693	*	inter:7550	NA	NA	NA	hg19_cpg_inter	143792
AR_ctr	CD4 mem	chr4	184315560	184315560	1	4	60	Open Sea	NA	NA	NA	NA	1	0.920645	0.0793553	0.118053	3.62e-10	1	1	0	1	0.708333	0.0667325	0	1e-06	1709208	0	0	20.7143	31.9444	9	18	29	61	6	18	chr4	184248580	184360788	112209	*	intergenic:4344	NA	NA	NA	hg19_genes_intergenic	50227
AR_ctr	CD4 mem	chr4	184315560	184315560	1	4	60	Open Sea	NA	NA	NA	NA	1	0.920645	0.0793553	0.118053	3.62e-10	1	1	0	1	0.708333	0.0667325	0	1e-06	1709208	0	0	20.7143	31.9444	9	18	29	61	6	18	chr4	184025380	184315564	290185	*	inter:4849	NA	NA	NA	hg19_cpg_inter	50227
AR_ctr	CD4 mem	chr5	94839735	94839735	1	4	50	Open Sea	NA	NA	NA	NA	0.802983	0.584117	0.218866	0.452478	9.16e-08	1	0.6	0.16655	0.789474	0	0.197054	0	0.000244489	725659	0	0	11.2857	14.6111	6	3	15	26	5	14	chr5	94839643	94842637	2995	-	intron:194154	uc003klb.3	9652	TTC37	hg19_genes_introns	51088
AR_ctr	CD4 mem	chr5	94839735	94839735	1	4	50	Open Sea	NA	NA	NA	NA	0.802983	0.584117	0.218866	0.452478	9.16e-08	1	0.6	0.16655	0.789474	0	0.197054	0	0.000244489	725659	0	0	11.2857	14.6111	6	3	15	26	5	14	chr5	94839443	94839842	400	-	intronexonboundary:201999	uc003klb.3	9652	TTC37	hg19_genes_intronexonboundaries	51088
AR_ctr	CD4 mem	chr5	94839735	94839735	1	4	50	Open Sea	NA	NA	NA	NA	0.802983	0.584117	0.218866	0.452478	9.16e-08	1	0.6	0.16655	0.789474	0	0.197054	0	0.000244489	725659	0	0	11.2857	14.6111	6	3	15	26	5	14	chr5	94625122	94886407	261286	*	inter:5282	NA	NA	NA	hg19_cpg_inter	51088
AR_ctr	CD4 mem	chr6	132680917	132680917	1	6	54	Open Sea	NA	NA	NA	NA	0.97619	0.793512	0.182678	0.295546	9.53e-08	1	0.833333	0.0629941	0.928571	0.555556	0.105502	0	0.000254344	976302	0	0	10.8571	13.8889	6	5	15	30	6	13	chr6	132649734	132693746	44013	-	intron:228636	uc003qde.3	26002	MOXD1	hg19_genes_introns	178508
AR_ctr	CD4 mem	chr6	132680917	132680917	1	6	54	Open Sea	NA	NA	NA	NA	0.97619	0.793512	0.182678	0.295546	9.53e-08	1	0.833333	0.0629941	0.928571	0.555556	0.105502	0	0.000254344	976302	0	0	10.8571	13.8889	6	5	15	30	6	13	chr6	132649734	132693746	44013	-	intron:228646	uc003qdf.3	26002	MOXD1	hg19_genes_introns	178508
AR_ctr	CD4 mem	chr6	132680917	132680917	1	6	54	Open Sea	NA	NA	NA	NA	0.97619	0.793512	0.182678	0.295546	9.53e-08	1	0.833333	0.0629941	0.928571	0.555556	0.105502	0	0.000254344	976302	0	0	10.8571	13.8889	6	5	15	30	6	13	chr6	132276567	132718093	441527	*	inter:6488	NA	NA	NA	hg19_cpg_inter	178508
AR_ctr	CD4 mem	chr4	182525245	182525245	1	8	50	Open Sea	NA	NA	NA	NA	0.873842	0.881762	-0.00791991	-0.0128701	1.41e-07	1	0.714286	0.104939	1	0.714286	0.0761048	0	0.000372835	3151689	0	0	16.1429	17	9	7	31	27	6	15	chr4	182085303	182756017	670715	*	intergenic:4338	NA	NA	NA	hg19_genes_intergenic	539893
AR_ctr	CD4 mem	chr4	182525245	182525245	1	8	50	Open Sea	NA	NA	NA	NA	0.873842	0.881762	-0.00791991	-0.0128701	1.41e-07	1	0.714286	0.104939	1	0.714286	0.0761048	0	0.000372835	3151689	0	0	16.1429	17	9	7	31	27	6	15	chr4	180984620	183058278	2073659	*	inter:4844	NA	NA	NA	hg19_cpg_inter	539893
AR_ctr	CD4 mem	chr10	4035393	4035393	1	6	58	Open Sea	NA	NA	NA	NA	0.937485	1	-0.0625153	-0.0921807	1.55e-07	1	0.9	0.0341922	1	1	0	0	0.000408224	1928513	0	1	15.1429	16.7778	10	0	26	35	7	14	chr10	3832474	4088917	256444	*	intergenic:8223	NA	NA	NA	hg19_genes_intergenic	58523
AR_ctr	CD4 mem	chr10	4035393	4035393	1	6	58	Open Sea	NA	NA	NA	NA	0.937485	1	-0.0625153	-0.0921807	1.55e-07	1	0.9	0.0341922	1	1	0	0	0.000408224	1928513	0	1	15.1429	16.7778	10	0	26	35	7	14	chr10	3832127	4864125	1031999	*	inter:9561	NA	NA	NA	hg19_cpg_inter	58523
AR_ctr	CD4 mem	chr4	1725577	1725577	1	1	53	Open Sea	NA	NA	NA	NA	0.629861	0.431649	0.198212	0.534859	1.6e-07	1	0.266667	0.274962	0.692308	0	0.147802	0	0.000419848	641551	0	0	19.4286	20.7222	12	5	32	41	7	16	chr4	1724085	1728084	4000	-	1to5kb:18923	uc003gdm.3	92305	TMEM129	hg19_genes_1to5kb	2359
AR_ctr	CD4 mem	chr4	1725577	1725577	1	1	53	Open Sea	NA	NA	NA	NA	0.629861	0.431649	0.198212	0.534859	1.6e-07	1	0.266667	0.274962	0.692308	0	0.147802	0	0.000419848	641551	0	0	19.4286	20.7222	12	5	32	41	7	16	chr4	1724085	1728084	4000	-	1to5kb:18924	uc003gdn.3	92305	TMEM129	hg19_genes_1to5kb	2359
AR_ctr	CD4 mem	chr4	1725577	1725577	1	1	53	Open Sea	NA	NA	NA	NA	0.629861	0.431649	0.198212	0.534859	1.6e-07	1	0.266667	0.274962	0.692308	0	0.147802	0	0.000419848	641551	0	0	19.4286	20.7222	12	5	32	41	7	16	chr4	1725455	1725597	143	+	CDS:137489	uc010ibz.3	10460	TACC3	hg19_genes_cds	2359
AR_ctr	CD4 mem	chr4	1725577	1725577	1	1	53	Open Sea	NA	NA	NA	NA	0.629861	0.431649	0.198212	0.534859	1.6e-07	1	0.266667	0.274962	0.692308	0	0.147802	0	0.000419848	641551	0	0	19.4286	20.7222	12	5	32	41	7	16	chr4	1725455	1725597	143	+	CDS:137498	uc003gdo.3	10460	TACC3	hg19_genes_cds	2359
AR_ctr	CD4 mem	chr4	1725577	1725577	1	1	53	Open Sea	NA	NA	NA	NA	0.629861	0.431649	0.198212	0.534859	1.6e-07	1	0.266667	0.274962	0.692308	0	0.147802	0	0.000419848	641551	0	0	19.4286	20.7222	12	5	32	41	7	16	chr4	1725455	1725597	143	+	CDS:137513	uc003gdp.3	10460	TACC3	hg19_genes_cds	2359
AR_ctr	CD4 mem	chr4	1725577	1725577	1	1	53	Open Sea	NA	NA	NA	NA	0.629861	0.431649	0.198212	0.534859	1.6e-07	1	0.266667	0.274962	0.692308	0	0.147802	0	0.000419848	641551	0	0	19.4286	20.7222	12	5	32	41	7	16	chr4	1725455	1725597	143	+	exon:169417	uc010ibz.3	10460	TACC3	hg19_genes_exons	2359
AR_ctr	CD4 mem	chr4	1725577	1725577	1	1	53	Open Sea	NA	NA	NA	NA	0.629861	0.431649	0.198212	0.534859	1.6e-07	1	0.266667	0.274962	0.692308	0	0.147802	0	0.000419848	641551	0	0	19.4286	20.7222	12	5	32	41	7	16	chr4	1725455	1725597	143	+	exon:169427	uc003gdo.3	10460	TACC3	hg19_genes_exons	2359
AR_ctr	CD4 mem	chr4	1725577	1725577	1	1	53	Open Sea	NA	NA	NA	NA	0.629861	0.431649	0.198212	0.534859	1.6e-07	1	0.266667	0.274962	0.692308	0	0.147802	0	0.000419848	641551	0	0	19.4286	20.7222	12	5	32	41	7	16	chr4	1725455	1725597	143	+	exon:169443	uc003gdp.3	10460	TACC3	hg19_genes_exons	2359
AR_ctr	CD4 mem	chr4	1725577	1725577	1	1	53	Open Sea	NA	NA	NA	NA	0.629861	0.431649	0.198212	0.534859	1.6e-07	1	0.266667	0.274962	0.692308	0	0.147802	0	0.000419848	641551	0	0	19.4286	20.7222	12	5	32	41	7	16	chr4	1725255	1725654	400	+	intronexonboundary:158368	uc010ibz.3	10460	TACC3	hg19_genes_intronexonboundaries	2359
AR_ctr	CD4 mem	chr4	1725577	1725577	1	1	53	Open Sea	NA	NA	NA	NA	0.629861	0.431649	0.198212	0.534859	1.6e-07	1	0.266667	0.274962	0.692308	0	0.147802	0	0.000419848	641551	0	0	19.4286	20.7222	12	5	32	41	7	16	chr4	1725255	1725654	400	+	intronexonboundary:158369	uc003gdo.3	10460	TACC3	hg19_genes_intronexonboundaries	2359
AR_ctr	CD4 mem	chr4	1725577	1725577	1	1	53	Open Sea	NA	NA	NA	NA	0.629861	0.431649	0.198212	0.534859	1.6e-07	1	0.266667	0.274962	0.692308	0	0.147802	0	0.000419848	641551	0	0	19.4286	20.7222	12	5	32	41	7	16	chr4	1725255	1725654	400	+	intronexonboundary:158370	uc003gdp.3	10460	TACC3	hg19_genes_intronexonboundaries	2359
AR_ctr	CD4 mem	chr4	1725577	1725577	1	1	53	Open Sea	NA	NA	NA	NA	0.629861	0.431649	0.198212	0.534859	1.6e-07	1	0.266667	0.274962	0.692308	0	0.147802	0	0.000419848	641551	0	0	19.4286	20.7222	12	5	32	41	7	16	chr4	1725397	1725796	400	+	exonintronboundary:159326	uc010ibz.3	10460	TACC3	hg19_genes_exonintronboundaries	2359
AR_ctr	CD4 mem	chr4	1725577	1725577	1	1	53	Open Sea	NA	NA	NA	NA	0.629861	0.431649	0.198212	0.534859	1.6e-07	1	0.266667	0.274962	0.692308	0	0.147802	0	0.000419848	641551	0	0	19.4286	20.7222	12	5	32	41	7	16	chr4	1725397	1725796	400	+	exonintronboundary:159327	uc003gdo.3	10460	TACC3	hg19_genes_exonintronboundaries	2359
AR_ctr	CD4 mem	chr4	1725577	1725577	1	1	53	Open Sea	NA	NA	NA	NA	0.629861	0.431649	0.198212	0.534859	1.6e-07	1	0.266667	0.274962	0.692308	0	0.147802	0	0.000419848	641551	0	0	19.4286	20.7222	12	5	32	41	7	16	chr4	1725397	1725796	400	+	exonintronboundary:159328	uc003gdp.3	10460	TACC3	hg19_genes_exonintronboundaries	2359
AR_ctr	CD4 mem	chr4	1725577	1725577	1	1	53	Open Sea	NA	NA	NA	NA	0.629861	0.431649	0.198212	0.534859	1.6e-07	1	0.266667	0.274962	0.692308	0	0.147802	0	0.000419848	641551	0	0	19.4286	20.7222	12	5	32	41	7	16	chr4	1723851	1725850	2000	*	shore:10063	NA	NA	NA	hg19_cpg_shores	2359
AR_ctr	CD4 mem	chr1	149812302	149812302	1	8	61	Island	NA	NA	NA	NA	0.0874157	0	0.0874157	3.28415	1.73e-07	0.2	0	0.0665273	0	0	0	0	0.00045269	821355	0	0	14.5714	18.2222	5	4	31	39	5	13	chr1	149812259	149812765	507	-	exon:58832	uc001esv.3	126961	HIST2H3C	hg19_genes_exons	8059
AR_ctr	CD4 mem	chr1	149812302	149812302	1	8	61	Island	NA	NA	NA	NA	0.0874157	0	0.0874157	3.28415	1.73e-07	0.2	0	0.0665273	0	0	0	0	0.00045269	821355	0	0	14.5714	18.2222	5	4	31	39	5	13	chr1	149812259	149812765	507	-	firstexon:6261	uc001esv.3	126961	HIST2H3C	hg19_genes_firstexons	8059
AR_ctr	CD4 mem	chr1	149812302	149812302	1	8	61	Island	NA	NA	NA	NA	0.0874157	0	0.0874157	3.28415	1.73e-07	0.2	0	0.0665273	0	0	0	0	0.00045269	821355	0	0	14.5714	18.2222	5	4	31	39	5	13	chr1	149812259	149812318	60	-	3UTR:4982	uc001esv.3	126961	HIST2H3C	hg19_genes_3UTRs	8059
AR_ctr	CD4 mem	chr1	149812302	149812302	1	8	61	Island	NA	NA	NA	NA	0.0874157	0	0.0874157	3.28415	1.73e-07	0.2	0	0.0665273	0	0	0	0	0.00045269	821355	0	0	14.5714	18.2222	5	4	31	39	5	13	chr1	149811755	149815044	3290	*	island:1645	NA	NA	NA	hg19_cpg_islands	8059
AR_ctr	CD4 mem	chr7	16173718	16173718	1	6	56	Open Sea	NA	NA	NA	NA	0.934563	0.885118	0.0494453	0.0775696	1.73e-07	1	0.75	0.0852634	1	0.6	0.0969614	0	0.000452905	2081209	0	0	17.2857	15.9444	12	5	25	29	7	15	chr7	16131425	16255690	124266	-	intron:249532	uc010ktx.2	729920	ISPD	hg19_genes_introns	76391
AR_ctr	CD4 mem	chr7	16173718	16173718	1	6	56	Open Sea	NA	NA	NA	NA	0.934563	0.885118	0.0494453	0.0775696	1.73e-07	1	0.75	0.0852634	1	0.6	0.0969614	0	0.000452905	2081209	0	0	17.2857	15.9444	12	5	25	29	7	15	chr7	16131425	16255690	124266	-	intron:249541	uc010kty.2	729920	ISPD	hg19_genes_introns	76391
AR_ctr	CD4 mem	chr7	16173718	16173718	1	6	56	Open Sea	NA	NA	NA	NA	0.934563	0.885118	0.0494453	0.0775696	1.73e-07	1	0.75	0.0852634	1	0.6	0.0969614	0	0.000452905	2081209	0	0	17.2857	15.9444	12	5	25	29	7	15	chr7	14035214	16456778	2421565	*	inter:6947	NA	NA	NA	hg19_cpg_inter	76391
AR_ctr	CD4 mem	chr1	200326043	200326043	1	6	62	Open Sea	NA	NA	NA	NA	0.951581	0.936783	0.014798	0.0223746	2.47e-07	1	0.869565	0.045875	1	0.84375	0.0436262	0	0.000641021	2946389	0	0	36.1429	38.5	23	19	52	79	7	18	chr1	200312539	200337792	25254	-	intron:60220	uc001gvd.1	554279	LINC00862	hg19_genes_introns	54883
AR_ctr	CD4 mem	chr1	200326043	200326043	1	6	62	Open Sea	NA	NA	NA	NA	0.951581	0.936783	0.014798	0.0223746	2.47e-07	1	0.869565	0.045875	1	0.84375	0.0436262	0	0.000641021	2946389	0	0	36.1429	38.5	23	19	52	79	7	18	chr1	200275539	200374899	99361	*	inter:1508	NA	NA	NA	hg19_cpg_inter	54883
AR_ctr	CD4 mem	chr12	117854289	117854289	1	2	57	Open Sea	NA	NA	NA	NA	0.866687	0.737811	0.128876	0.229388	2.55e-07	1	0.705882	0.117998	1	0.2	0.192074	0	0.000660702	1155209	0	0	17.4286	14.7222	6	4	34	31	5	14	chr12	117804608	117890816	86209	*	intergenic:10515	NA	NA	NA	hg19_genes_intergenic	386574
AR_ctr	CD4 mem	chr12	117854289	117854289	1	2	57	Open Sea	NA	NA	NA	NA	0.866687	0.737811	0.128876	0.229388	2.55e-07	1	0.705882	0.117998	1	0.2	0.192074	0	0.000660702	1155209	0	0	17.4286	14.7222	6	4	34	31	5	14	chr12	117803449	118194767	391319	*	inter:12070	NA	NA	NA	hg19_cpg_inter	386574
AR_ctr	CD4 mem	chr12	31565043	31565043	1	1	48	Open Sea	NA	NA	NA	NA	0.839545	0.847692	-0.00814705	-0.0137694	2.63e-07	1	0.685714	0.118115	1	0.690476	0.0873405	0	0.000679043	3131791	1	3	30.1429	38.1111	0	0	59	97	5	14	chr12	31562319	31566369	4051	-	intron:391943	uc001rkh.1	160518	DENND5B	hg19_genes_introns	87792
AR_ctr	CD4 mem	chr12	31565043	31565043	1	1	48	Open Sea	NA	NA	NA	NA	0.839545	0.847692	-0.00814705	-0.0137694	2.63e-07	1	0.685714	0.118115	1	0.690476	0.0873405	0	0.000679043	3131791	1	3	30.1429	38.1111	0	0	59	97	5	14	chr12	31562319	31566369	4051	-	intron:391965	uc001rki.1	160518	DENND5B	hg19_genes_introns	87792
AR_ctr	CD4 mem	chr12	31565043	31565043	1	1	48	Open Sea	NA	NA	NA	NA	0.839545	0.847692	-0.00814705	-0.0137694	2.63e-07	1	0.685714	0.118115	1	0.690476	0.0873405	0	0.000679043	3131791	1	3	30.1429	38.1111	0	0	59	97	5	14	chr12	31483467	31738760	255294	*	inter:11573	NA	NA	NA	hg19_cpg_inter	87792
AR_ctr	CD4 mem	chr7	154441426	154441426	1	1	61	Open Sea	NA	NA	NA	NA	0.7911	0.676294	0.114806	0.223156	2.66e-07	1	0.5	0.212529	0.977273	0	0.227823	0	0.000686366	1174970	0	0	17.7143	20.1667	4	2	29	44	6	16	chr7	154429584	154461069	31486	+	intron:247415	uc003wli.3	1804	DPP6	hg19_genes_introns	278799
AR_ctr	CD4 mem	chr7	154441426	154441426	1	1	61	Open Sea	NA	NA	NA	NA	0.7911	0.676294	0.114806	0.223156	2.66e-07	1	0.5	0.212529	0.977273	0	0.227823	0	0.000686366	1174970	0	0	17.7143	20.1667	4	2	29	44	6	16	chr7	154429584	154461069	31486	+	intron:247445	uc003wlk.3	1804	DPP6	hg19_genes_introns	278799
AR_ctr	CD4 mem	chr7	154441426	154441426	1	1	61	Open Sea	NA	NA	NA	NA	0.7911	0.676294	0.114806	0.223156	2.66e-07	1	0.5	0.212529	0.977273	0	0.227823	0	0.000686366	1174970	0	0	17.7143	20.1667	4	2	29	44	6	16	chr7	154429584	154461069	31486	+	intron:247472	uc003wlm.3	1804	DPP6	hg19_genes_introns	278799
AR_ctr	CD4 mem	chr7	154441426	154441426	1	1	61	Open Sea	NA	NA	NA	NA	0.7911	0.676294	0.114806	0.223156	2.66e-07	1	0.5	0.212529	0.977273	0	0.227823	0	0.000686366	1174970	0	0	17.7143	20.1667	4	2	29	44	6	16	chr7	154264002	154519476	255475	+	intron:247496	uc011kvq.2	1804	DPP6	hg19_genes_introns	278799
AR_ctr	CD4 mem	chr7	154441426	154441426	1	1	61	Open Sea	NA	NA	NA	NA	0.7911	0.676294	0.114806	0.223156	2.66e-07	1	0.5	0.212529	0.977273	0	0.227823	0	0.000686366	1174970	0	0	17.7143	20.1667	4	2	29	44	6	16	chr7	154006282	154538059	531778	*	inter:7740	NA	NA	NA	hg19_cpg_inter	278799
AR_ctr	CD4 mem	chr15	60924602	60924602	1	4	53	Open Sea	NA	NA	NA	NA	0.880759	0.706518	0.174242	0.314033	2.8e-07	1	0.782609	0.091835	0.952381	0	0.200438	0	0.000719756	938012	0	0	21.1429	21.8889	9	1	37	38	5	16	chr15	60920730	60924729	4000	-	1to5kb:56034	uc002agv.3	6095	RORA	hg19_genes_1to5kb	104376
AR_ctr	CD4 mem	chr15	60924602	60924602	1	4	53	Open Sea	NA	NA	NA	NA	0.880759	0.706518	0.174242	0.314033	2.8e-07	1	0.782609	0.091835	0.952381	0	0.200438	0	0.000719756	938012	0	0	21.1429	21.8889	9	1	37	38	5	16	chr15	60920730	60924729	4000	-	1to5kb:56035	uc002agw.3	6095	RORA	hg19_genes_1to5kb	104376
AR_ctr	CD4 mem	chr15	60924602	60924602	1	4	53	Open Sea	NA	NA	NA	NA	0.880759	0.706518	0.174242	0.314033	2.8e-07	1	0.782609	0.091835	0.952381	0	0.200438	0	0.000719756	938012	0	0	21.1429	21.8889	9	1	37	38	5	16	chr15	60824051	60970855	146805	-	intron:458174	uc002agx.3	6095	RORA	hg19_genes_introns	104376
AR_ctr	CD4 mem	chr15	60924602	60924602	1	4	53	Open Sea	NA	NA	NA	NA	0.880759	0.706518	0.174242	0.314033	2.8e-07	1	0.782609	0.091835	0.952381	0	0.200438	0	0.000719756	938012	0	0	21.1429	21.8889	9	1	37	38	5	16	chr15	60889351	61515621	626271	*	inter:13617	NA	NA	NA	hg19_cpg_inter	104376
AR_ctr	CD4 mem	chr12	117275106	117275106	1	2	54	Open Sea	NA	NA	NA	NA	0.889199	0.761223	0.127976	0.221493	2.9e-07	1	0.740741	0.0990392	0.947368	0.333333	0.153117	0	0.000743952	1180368	0	0	16.5714	20	8	6	30	41	6	16	chr12	117274088	117290454	16367	+	intron:385937	uc001twa.4	84900	RNFT2	hg19_genes_introns	13799
AR_ctr	CD4 mem	chr12	117275106	117275106	1	2	54	Open Sea	NA	NA	NA	NA	0.889199	0.761223	0.127976	0.221493	2.9e-07	1	0.740741	0.0990392	0.947368	0.333333	0.153117	0	0.000743952	1180368	0	0	16.5714	20	8	6	30	41	6	16	chr12	117274088	117290454	16367	+	intron:385947	uc001twb.4	84900	RNFT2	hg19_genes_introns	13799
AR_ctr	CD4 mem	chr12	117275106	117275106	1	2	54	Open Sea	NA	NA	NA	NA	0.889199	0.761223	0.127976	0.221493	2.9e-07	1	0.740741	0.0990392	0.947368	0.333333	0.153117	0	0.000743952	1180368	0	0	16.5714	20	8	6	30	41	6	16	chr12	117274088	117287118	13031	+	intron:385957	uc009zwn.3	84900	RNFT2	hg19_genes_introns	13799
AR_ctr	CD4 mem	chr12	117275106	117275106	1	2	54	Open Sea	NA	NA	NA	NA	0.889199	0.761223	0.127976	0.221493	2.9e-07	1	0.740741	0.0990392	0.947368	0.333333	0.153117	0	0.000743952	1180368	0	0	16.5714	20	8	6	30	41	6	16	chr12	117274088	117287118	13031	+	intron:385964	uc001twc.4	84900	RNFT2	hg19_genes_introns	13799
AR_ctr	CD4 mem	chr12	117275106	117275106	1	2	54	Open Sea	NA	NA	NA	NA	0.889199	0.761223	0.127976	0.221493	2.9e-07	1	0.740741	0.0990392	0.947368	0.333333	0.153117	0	0.000743952	1180368	0	0	16.5714	20	8	6	30	41	6	16	chr12	117261503	117312389	50887	*	inter:12063	NA	NA	NA	hg19_cpg_inter	13799
AR_ctr	CD4 mem	chr17	3784368	3784368	1	3	57	Open Sea	NA	NA	NA	NA	0.907984	0.825881	0.0821035	0.135172	2.91e-07	1	0.823529	0.0684829	0.961538	0	0.215135	0	0.000746638	1589069	0	0	19.7143	20.5	4	2	35	35	6	17	chr17	3783729	3784920	1192	-	intron:508247	uc002fwt.3	84254	CAMKK1	hg19_genes_introns	157170
AR_ctr	CD4 mem	chr17	3784368	3784368	1	3	57	Open Sea	NA	NA	NA	NA	0.907984	0.825881	0.0821035	0.135172	2.91e-07	1	0.823529	0.0684829	0.961538	0	0.215135	0	0.000746638	1589069	0	0	19.7143	20.5	4	2	35	35	6	17	chr17	3783729	3784920	1192	-	intron:508262	uc002fwu.3	84254	CAMKK1	hg19_genes_introns	157170
AR_ctr	CD4 mem	chr17	3784368	3784368	1	3	57	Open Sea	NA	NA	NA	NA	0.907984	0.825881	0.0821035	0.135172	2.91e-07	1	0.823529	0.0684829	0.961538	0	0.215135	0	0.000746638	1589069	0	0	19.7143	20.5	4	2	35	35	6	17	chr17	3783729	3784920	1192	-	intron:508276	uc002fwv.3	84254	CAMKK1	hg19_genes_introns	157170
AR_ctr	CD4 mem	chr17	3784368	3784368	1	3	57	Open Sea	NA	NA	NA	NA	0.907984	0.825881	0.0821035	0.135172	2.91e-07	1	0.823529	0.0684829	0.961538	0	0.215135	0	0.000746638	1589069	0	0	19.7143	20.5	4	2	35	35	6	17	chr17	3775677	3787944	12268	*	inter:14947	NA	NA	NA	hg19_cpg_inter	157170
AR_ctr	CD4 mem	chr5	170914882	170914882	1	5	46	Open Sea	NA	NA	NA	NA	0.877641	0.767258	0.110383	0.191583	3.46e-07	1	0.666667	0.120835	0.947368	0.25	0.172848	0	0.000880372	1292376	0	0	15.4286	12.7778	12	4	19	20	7	14	chr5	170884631	171288555	403925	*	intergenic:5029	NA	NA	NA	hg19_genes_intergenic	68214
AR_ctr	CD4 mem	chr5	170914882	170914882	1	5	46	Open Sea	NA	NA	NA	NA	0.877641	0.767258	0.110383	0.191583	3.46e-07	1	0.666667	0.120835	0.947368	0.25	0.172848	0	0.000880372	1292376	0	0	15.4286	12.7778	12	4	19	20	7	14	chr5	170887837	171053071	165235	*	inter:5625	NA	NA	NA	hg19_cpg_inter	68214
AR_ctr	CD4 mem	chr3	152756797	152756797	1	5	56	Open Sea	NA	NA	NA	NA	0.791336	0.633955	0.157381	0.315447	3.68e-07	1	0.611111	0.162932	0.88	0	0.213123	0	0.000934097	935520	0	0	15.5714	19.8333	3	1	27	38	6	16	chr3	152555844	152875028	319185	*	intergenic:3432	NA	NA	NA	hg19_genes_intergenic	123230
AR_ctr	CD4 mem	chr3	152756797	152756797	1	5	56	Open Sea	NA	NA	NA	NA	0.791336	0.633955	0.157381	0.315447	3.68e-07	1	0.611111	0.162932	0.88	0	0.213123	0	0.000934097	935520	0	0	15.5714	19.8333	3	1	27	38	6	16	chr3	152557713	152874268	316556	*	inter:3938	NA	NA	NA	hg19_cpg_inter	123230
AR_ctr	CD4 mem	chr8	899674	899674	1	2	56	Open Sea	NA	NA	NA	NA	0.0263158	0.149966	-0.12365	-2.13909	3.7e-07	0.184211	0	0.069625	0.285714	0.0285714	0.0773024	0	0.000936725	498062	0	0	21.2857	30.7222	7	8	38	66	6	17	chr8	857967	1087298	229332	+	intron:261894	uc003wpj.2	619343	NA	hg19_genes_introns	66475
AR_ctr	CD4 mem	chr8	899674	899674	1	2	56	Open Sea	NA	NA	NA	NA	0.0263158	0.149966	-0.12365	-2.13909	3.7e-07	0.184211	0	0.069625	0.285714	0.0285714	0.0773024	0	0.000936725	498062	0	0	21.2857	30.7222	7	8	38	66	6	17	chr8	857967	952112	94146	+	intron:261896	uc003wpk.3	619343	NA	hg19_genes_introns	66475
AR_ctr	CD4 mem	chr8	899674	899674	1	2	56	Open Sea	NA	NA	NA	NA	0.0263158	0.149966	-0.12365	-2.13909	3.7e-07	0.184211	0	0.069625	0.285714	0.0285714	0.0773024	0	0.000936725	498062	0	0	21.2857	30.7222	7	8	38	66	6	17	chr8	897761	910817	13057	*	inter:7857	NA	NA	NA	hg19_cpg_inter	66475
AR_ctr	CD4 mem	chr17	36218049	36218049	1	3	46	Open Sea	NA	NA	NA	NA	0.943452	1	-0.0565476	-0.0831225	3.7e-07	1	0.666667	0.124254	1	1	0	0	0.000938053	2020469	0	1	11.8571	10.5556	6	0	17	21	5	10	chr17	36214849	36233821	18973	-	intron:515306	uc002hom.1	284100	YWHAEP7	hg19_genes_introns	65909
AR_ctr	CD4 mem	chr17	36218049	36218049	1	3	46	Open Sea	NA	NA	NA	NA	0.943452	1	-0.0565476	-0.0831225	3.7e-07	1	0.666667	0.124254	1	1	0	0	0.000938053	2020469	0	1	11.8571	10.5556	6	0	17	21	5	10	chr17	36214849	36233821	18973	-	intron:515310	uc002hon.1	284100	YWHAEP7	hg19_genes_introns	65909
AR_ctr	CD4 mem	chr17	36218049	36218049	1	3	46	Open Sea	NA	NA	NA	NA	0.943452	1	-0.0565476	-0.0831225	3.7e-07	1	0.666667	0.124254	1	1	0	0	0.000938053	2020469	0	1	11.8571	10.5556	6	0	17	21	5	10	chr17	36109584	36276473	166890	*	inter:15318	NA	NA	NA	hg19_cpg_inter	65909
AR_ctr	CD4 mem	chr2	2591921	2591921	1	1	48	Open Sea	NA	NA	NA	NA	0.835089	0.675041	0.160048	0.302913	4.45e-07	1	0.666667	0.136489	0.954545	0.111111	0.215763	0	0.00111595	960471	0	0	11.1429	15.2222	3	2	18	34	5	13	chr2	2340046	2898819	558774	*	intergenic:1656	NA	NA	NA	hg19_genes_intergenic	268916
AR_ctr	CD4 mem	chr2	2591921	2591921	1	1	48	Open Sea	NA	NA	NA	NA	0.835089	0.675041	0.160048	0.302913	4.45e-07	1	0.666667	0.136489	0.954545	0.111111	0.215763	0	0.00111595	960471	0	0	11.1429	15.2222	3	2	18	34	5	13	chr2	2197717	2650108	452392	*	inter:1912	NA	NA	NA	hg19_cpg_inter	268916
AR_ctr	CD4 mem	chr7	139476774	139476774	1	8	60	Open Sea	NA	NA	NA	NA	0.109524	0	0.109524	3.57923	4.63e-07	0.666667	0	0.248487	0	0	0	0	0.00115942	602137	0	1	11.8571	11.4444	3	0	18	28	5	10	chr7	139473047	139477046	4000	+	1to5kb:29558	uc003vvh.3	6916	TBXAS1	hg19_genes_1to5kb	1271
AR_ctr	CD4 mem	chr7	139476774	139476774	1	8	60	Open Sea	NA	NA	NA	NA	0.109524	0	0.109524	3.57923	4.63e-07	0.666667	0	0.248487	0	0	0	0	0.00115942	602137	0	1	11.8571	11.4444	3	0	18	28	5	10	chr7	139473047	139477046	4000	+	1to5kb:29559	uc010lne.3	6916	TBXAS1	hg19_genes_1to5kb	1271
AR_ctr	CD4 mem	chr7	139476774	139476774	1	8	60	Open Sea	NA	NA	NA	NA	0.109524	0	0.109524	3.57923	4.63e-07	0.666667	0	0.248487	0	0	0	0	0.00115942	602137	0	1	11.8571	11.4444	3	0	18	28	5	10	chr7	139416815	139477403	60589	-	intron:259891	uc003vvd.4	28996	HIPK2	hg19_genes_introns	1271
AR_ctr	CD4 mem	chr7	139476774	139476774	1	8	60	Open Sea	NA	NA	NA	NA	0.109524	0	0.109524	3.57923	4.63e-07	0.666667	0	0.248487	0	0	0	0	0.00115942	602137	0	1	11.8571	11.4444	3	0	18	28	5	10	chr7	139416815	139477403	60589	-	intron:259905	uc003vvf.4	28996	HIPK2	hg19_genes_introns	1271
AR_ctr	CD4 mem	chr7	139476774	139476774	1	8	60	Open Sea	NA	NA	NA	NA	0.109524	0	0.109524	3.57923	4.63e-07	0.666667	0	0.248487	0	0	0	0	0.00115942	602137	0	1	11.8571	11.4444	3	0	18	28	5	10	chr7	139475407	139477406	2000	*	shore:18504	NA	NA	NA	hg19_cpg_shores	1271
AR_ctr	CD4 mem	chr3	5533476	5533476	1	3	55	Open Sea	NA	NA	NA	NA	0.829502	0.689747	0.139755	0.2627	4.88e-07	1	0.666667	0.138396	0.9	0	0.204238	0	0.00121724	1053953	0	0	17.4286	18.7222	9	2	29	37	6	15	chr3	5299909	6527165	1227257	*	intergenic:2791	NA	NA	NA	hg19_genes_intergenic	303441
AR_ctr	CD4 mem	chr3	5533476	5533476	1	3	55	Open Sea	NA	NA	NA	NA	0.829502	0.689747	0.139755	0.2627	4.88e-07	1	0.666667	0.138396	0.9	0	0.204238	0	0.00121724	1053953	0	0	17.4286	18.7222	9	2	29	37	6	15	chr3	5234191	6898823	1664633	*	inter:3199	NA	NA	NA	hg19_cpg_inter	303441
AR_ctr	CD4 mem	chr16	19422498	19422498	1	6	49	Island	NA	NA	NA	NA	0.0369369	0.0488833	-0.0119464	-0.327137	5.03e-07	0.113402	0	0.0398623	0.109375	0	0.0369429	0	0.00125379	2751665	0	0	67.5714	64.4444	45	39	97	121	7	18	chr16	19422057	19422498	442	+	5UTR:78434	uc002dgb.4	79838	TMC5	hg19_genes_5UTRs	440
AR_ctr	CD4 mem	chr16	19422498	19422498	1	6	49	Island	NA	NA	NA	NA	0.0369369	0.0488833	-0.0119464	-0.327137	5.03e-07	0.113402	0	0.0398623	0.109375	0	0.0369429	0	0.00125379	2751665	0	0	67.5714	64.4444	45	39	97	121	7	18	chr16	19422057	19422498	442	+	5UTR:78437	uc002dgc.4	79838	TMC5	hg19_genes_5UTRs	440
AR_ctr	CD4 mem	chr16	19422498	19422498	1	6	49	Island	NA	NA	NA	NA	0.0369369	0.0488833	-0.0119464	-0.327137	5.03e-07	0.113402	0	0.0398623	0.109375	0	0.0369429	0	0.00125379	2751665	0	0	67.5714	64.4444	45	39	97	121	7	18	chr16	19422057	19422498	442	+	exon:525435	uc002dgb.4	79838	TMC5	hg19_genes_exons	440
AR_ctr	CD4 mem	chr16	19422498	19422498	1	6	49	Island	NA	NA	NA	NA	0.0369369	0.0488833	-0.0119464	-0.327137	5.03e-07	0.113402	0	0.0398623	0.109375	0	0.0369429	0	0.00125379	2751665	0	0	67.5714	64.4444	45	39	97	121	7	18	chr16	19422057	19422498	442	+	exon:525456	uc002dgc.4	79838	TMC5	hg19_genes_exons	440
AR_ctr	CD4 mem	chr16	19422498	19422498	1	6	49	Island	NA	NA	NA	NA	0.0369369	0.0488833	-0.0119464	-0.327137	5.03e-07	0.113402	0	0.0398623	0.109375	0	0.0369429	0	0.00125379	2751665	0	0	67.5714	64.4444	45	39	97	121	7	18	chr16	19422057	19422498	442	+	firstexon:57413	uc002dgb.4	79838	TMC5	hg19_genes_firstexons	440
AR_ctr	CD4 mem	chr16	19422498	19422498	1	6	49	Island	NA	NA	NA	NA	0.0369369	0.0488833	-0.0119464	-0.327137	5.03e-07	0.113402	0	0.0398623	0.109375	0	0.0369429	0	0.00125379	2751665	0	0	67.5714	64.4444	45	39	97	121	7	18	chr16	19422057	19422498	442	+	firstexon:57414	uc002dgc.4	79838	TMC5	hg19_genes_firstexons	440
AR_ctr	CD4 mem	chr16	19422498	19422498	1	6	49	Island	NA	NA	NA	NA	0.0369369	0.0488833	-0.0119464	-0.327137	5.03e-07	0.113402	0	0.0398623	0.109375	0	0.0369429	0	0.00125379	2751665	0	0	67.5714	64.4444	45	39	97	121	7	18	chr16	19422096	19441734	19639	+	intron:467827	uc010vaq.2	79838	TMC5	hg19_genes_introns	440
AR_ctr	CD4 mem	chr16	19422498	19422498	1	6	49	Island	NA	NA	NA	NA	0.0369369	0.0488833	-0.0119464	-0.327137	5.03e-07	0.113402	0	0.0398623	0.109375	0	0.0369429	0	0.00125379	2751665	0	0	67.5714	64.4444	45	39	97	121	7	18	chr16	19422298	19422697	400	+	exonintronboundary:492893	uc002dgb.4	79838	TMC5	hg19_genes_exonintronboundaries	440
AR_ctr	CD4 mem	chr16	19422498	19422498	1	6	49	Island	NA	NA	NA	NA	0.0369369	0.0488833	-0.0119464	-0.327137	5.03e-07	0.113402	0	0.0398623	0.109375	0	0.0369429	0	0.00125379	2751665	0	0	67.5714	64.4444	45	39	97	121	7	18	chr16	19422298	19422697	400	+	exonintronboundary:492894	uc002dgc.4	79838	TMC5	hg19_genes_exonintronboundaries	440
AR_ctr	CD4 mem	chr16	19422498	19422498	1	6	49	Island	NA	NA	NA	NA	0.0369369	0.0488833	-0.0119464	-0.327137	5.03e-07	0.113402	0	0.0398623	0.109375	0	0.0369429	0	0.00125379	2751665	0	0	67.5714	64.4444	45	39	97	121	7	18	chr16	19421817	19422498	682	*	island:19149	NA	NA	NA	hg19_cpg_islands	440
AR_ctr	CD4 mem	chr19	3157089	3157089	1	6	59	Open Sea	NA	NA	NA	NA	0.929696	0.864496	0.0651994	0.103741	5.04e-07	1	0.833333	0.0680781	0.964286	0.78125	0.0579791	0	0.00125483	1825160	0	0	29.1429	34.0556	13	12	35	56	7	18	chr19	3155951	3157725	1775	+	intron:536505	uc002lxf.2	2769	GNA15	hg19_genes_introns	20897
AR_ctr	CD4 mem	chr19	3157089	3157089	1	6	59	Open Sea	NA	NA	NA	NA	0.929696	0.864496	0.0651994	0.103741	5.04e-07	1	0.833333	0.0680781	0.964286	0.78125	0.0579791	0	0.00125483	1825160	0	0	29.1429	34.0556	13	12	35	56	7	18	chr19	3126717	3158841	32125	*	inter:16490	NA	NA	NA	hg19_cpg_inter	20897
AR_ctr	CD4 mem	chr13	60349538	60349538	1	4	53	Open Sea	NA	NA	NA	NA	0.926859	0.889294	0.0375653	0.0590395	6.04e-07	1	0.794118	0.074586	1	0.769231	0.0710895	0	0.00149993	2312720	0	0	22.2857	23.3889	15	13	34	36	7	18	chr13	60348958	60384921	35964	-	intron:413890	uc001vht.4	81624	DIAPH3	hg19_genes_introns	237345
AR_ctr	CD4 mem	chr13	60349538	60349538	1	4	53	Open Sea	NA	NA	NA	NA	0.926859	0.889294	0.0375653	0.0590395	6.04e-07	1	0.794118	0.074586	1	0.769231	0.0710895	0	0.00149993	2312720	0	0	22.2857	23.3889	15	13	34	36	7	18	chr13	60348958	60384921	35964	-	intron:413917	uc001vhw.2	81624	DIAPH3	hg19_genes_introns	237345
AR_ctr	CD4 mem	chr13	60349538	60349538	1	4	53	Open Sea	NA	NA	NA	NA	0.926859	0.889294	0.0375653	0.0590395	6.04e-07	1	0.794118	0.074586	1	0.769231	0.0710895	0	0.00149993	2312720	0	0	22.2857	23.3889	15	13	34	36	7	18	chr13	60348958	60384921	35964	-	intron:413943	uc010aed.2	81624	DIAPH3	hg19_genes_introns	237345
AR_ctr	CD4 mem	chr13	60349538	60349538	1	4	53	Open Sea	NA	NA	NA	NA	0.926859	0.889294	0.0375653	0.0590395	6.04e-07	1	0.794118	0.074586	1	0.769231	0.0710895	0	0.00149993	2312720	0	0	22.2857	23.3889	15	13	34	36	7	18	chr13	60348958	60384921	35964	-	intron:413968	uc010aee.2	81624	DIAPH3	hg19_genes_introns	237345
AR_ctr	CD4 mem	chr13	60349538	60349538	1	4	53	Open Sea	NA	NA	NA	NA	0.926859	0.889294	0.0375653	0.0590395	6.04e-07	1	0.794118	0.074586	1	0.769231	0.0710895	0	0.00149993	2312720	0	0	22.2857	23.3889	15	13	34	36	7	18	chr13	60348958	60384921	35964	-	intron:413992	uc001vhu.3	81624	DIAPH3	hg19_genes_introns	237345
AR_ctr	CD4 mem	chr13	60349538	60349538	1	4	53	Open Sea	NA	NA	NA	NA	0.926859	0.889294	0.0375653	0.0590395	6.04e-07	1	0.794118	0.074586	1	0.769231	0.0710895	0	0.00149993	2312720	0	0	22.2857	23.3889	15	13	34	36	7	18	chr13	60348958	60384921	35964	-	intron:414012	uc031qlw.1	81624	DIAPH3	hg19_genes_introns	237345
AR_ctr	CD4 mem	chr13	60349538	60349538	1	4	53	Open Sea	NA	NA	NA	NA	0.926859	0.889294	0.0375653	0.0590395	6.04e-07	1	0.794118	0.074586	1	0.769231	0.0710895	0	0.00149993	2312720	0	0	22.2857	23.3889	15	13	34	36	7	18	chr13	58212931	60733660	2520730	*	inter:12523	NA	NA	NA	hg19_cpg_inter	237345
AR_ctr	CD4 mem	chr21	39129783	39129783	1	2	55	Open Sea	NA	NA	NA	NA	0.807176	0.615881	0.191294	0.384757	6.06e-07	1	0.571429	0.18998	0.888889	0	0.201214	0	0.00150224	815152	0	0	14.5714	18.7778	5	4	24	36	5	16	chr21	39087435	39212959	125525	-	intron:588801	uc011aej.2	3763	KCNJ6	hg19_genes_introns	268695
AR_ctr	CD4 mem	chr21	39129783	39129783	1	2	55	Open Sea	NA	NA	NA	NA	0.807176	0.615881	0.191294	0.384757	6.06e-07	1	0.571429	0.18998	0.888889	0	0.201214	0	0.00150224	815152	0	0	14.5714	18.7778	5	4	24	36	5	16	chr21	39087435	39212959	125525	-	intron:588804	uc002ywo.3	3763	KCNJ6	hg19_genes_introns	268695
AR_ctr	CD4 mem	chr21	39129783	39129783	1	2	55	Open Sea	NA	NA	NA	NA	0.807176	0.615881	0.191294	0.384757	6.06e-07	1	0.571429	0.18998	0.888889	0	0.201214	0	0.00150224	815152	0	0	14.5714	18.7778	5	4	24	36	5	16	chr21	39051929	39283946	232018	*	inter:18384	NA	NA	NA	hg19_cpg_inter	268695
AR_ctr	CD4 mem	chr11	74883831	74883831	1	3	52	Open Sea	NA	NA	NA	NA	0.895635	0.906604	-0.0109685	-0.0173681	6.14e-07	1	0.782609	0.0855756	1	0.75	0.0644362	0	0.00151997	3052787	0	0	18	20.1111	11	11	25	29	7	18	chr11	74883615	74899180	15566	+	intron:348451	uc010rrq.2	11309	SLCO2B1	hg19_genes_introns	12986
AR_ctr	CD4 mem	chr11	74883831	74883831	1	3	52	Open Sea	NA	NA	NA	NA	0.895635	0.906604	-0.0109685	-0.0173681	6.14e-07	1	0.782609	0.0855756	1	0.75	0.0644362	0	0.00151997	3052787	0	0	18	20.1111	11	11	25	29	7	18	chr11	74883615	74899180	15566	+	intron:348462	uc001owb.3	11309	SLCO2B1	hg19_genes_introns	12986
AR_ctr	CD4 mem	chr11	74883831	74883831	1	3	52	Open Sea	NA	NA	NA	NA	0.895635	0.906604	-0.0109685	-0.0173681	6.14e-07	1	0.782609	0.0855756	1	0.75	0.0644362	0	0.00151997	3052787	0	0	18	20.1111	11	11	25	29	7	18	chr11	74883615	74899180	15566	+	intron:348471	uc001owc.3	11309	SLCO2B1	hg19_genes_introns	12986
AR_ctr	CD4 mem	chr11	74883831	74883831	1	3	52	Open Sea	NA	NA	NA	NA	0.895635	0.906604	-0.0109685	-0.0173681	6.14e-07	1	0.782609	0.0855756	1	0.75	0.0644362	0	0.00151997	3052787	0	0	18	20.1111	11	11	25	29	7	18	chr11	74883615	74899180	15566	+	intron:348481	uc010rrr.2	11309	SLCO2B1	hg19_genes_introns	12986
AR_ctr	CD4 mem	chr11	74883831	74883831	1	3	52	Open Sea	NA	NA	NA	NA	0.895635	0.906604	-0.0109685	-0.0173681	6.14e-07	1	0.782609	0.0855756	1	0.75	0.0644362	0	0.00151997	3052787	0	0	18	20.1111	11	11	25	29	7	18	chr11	74883615	74899180	15566	+	intron:348492	uc010rrs.2	11309	SLCO2B1	hg19_genes_introns	12986
AR_ctr	CD4 mem	chr11	74883831	74883831	1	3	52	Open Sea	NA	NA	NA	NA	0.895635	0.906604	-0.0109685	-0.0173681	6.14e-07	1	0.782609	0.0855756	1	0.75	0.0644362	0	0.00151997	3052787	0	0	18	20.1111	11	11	25	29	7	18	chr11	74883615	74899180	15566	+	intron:348505	uc001owd.3	11309	SLCO2B1	hg19_genes_introns	12986
AR_ctr	CD4 mem	chr11	74883831	74883831	1	3	52	Open Sea	NA	NA	NA	NA	0.895635	0.906604	-0.0109685	-0.0173681	6.14e-07	1	0.782609	0.0855756	1	0.75	0.0644362	0	0.00151997	3052787	0	0	18	20.1111	11	11	25	29	7	18	chr11	74704187	74947647	243461	*	inter:11049	NA	NA	NA	hg19_cpg_inter	12986
AR_ctr	CD4 mem	chr7	104061071	104061071	1	9	62	Open Sea	NA	NA	NA	NA	0.875256	0.734106	0.14115	0.250587	6.44e-07	1	0.764706	0.100577	0.933333	0.428571	0.1113	0	0.00159207	1090840	0	0	13.7143	13.7222	7	4	21	22	6	16	chr7	103969673	104377121	407449	+	intron:242517	uc003vce.3	375612	LHFPL3	hg19_genes_introns	91329
AR_ctr	CD4 mem	chr7	104061071	104061071	1	9	62	Open Sea	NA	NA	NA	NA	0.875256	0.734106	0.14115	0.250587	6.44e-07	1	0.764706	0.100577	0.933333	0.428571	0.1113	0	0.00159207	1090840	0	0	13.7143	13.7222	7	4	21	22	6	16	chr7	103969673	104377121	407449	+	intron:242519	uc003vcf.3	375612	LHFPL3	hg19_genes_introns	91329
AR_ctr	CD4 mem	chr7	104061071	104061071	1	9	62	Open Sea	NA	NA	NA	NA	0.875256	0.734106	0.14115	0.250587	6.44e-07	1	0.764706	0.100577	0.933333	0.428571	0.1113	0	0.00159207	1090840	0	0	13.7143	13.7222	7	4	21	22	6	16	chr7	103973960	104620337	646378	*	inter:7491	NA	NA	NA	hg19_cpg_inter	91329
AR_ctr	CD4 mem	chr22	23868660	23868660	1	1	54	Open Sea	NA	NA	NA	NA	0.928405	0.825123	0.103282	0.168223	6.53e-07	1	0.807692	0.069347	1	0.696429	0.0831301	0	0.00161228	1397084	0	0	35.8571	45.5556	8	14	69	79	6	18	chr22	23834168	23915312	81145	*	intergenic:15313	NA	NA	NA	hg19_genes_intergenic	164299
AR_ctr	CD4 mem	chr22	23868660	23868660	1	1	54	Open Sea	NA	NA	NA	NA	0.928405	0.825123	0.103282	0.168223	6.53e-07	1	0.807692	0.069347	1	0.696429	0.0831301	0	0.00161228	1397084	0	0	35.8571	45.5556	8	14	69	79	6	18	chr22	23868380	23904322	35943	*	inter:18677	NA	NA	NA	hg19_cpg_inter	164299
AR_ctr	CD4 mem	chr3	105746251	105746251	1	6	47	Open Sea	NA	NA	NA	NA	0.932313	0.810007	0.122306	0.20057	6.73e-07	1	0.857143	0.0574044	0.933333	0	0.211533	0	0.00166026	1257368	0	0	15.2857	15.7778	10	2	21	28	7	16	chr3	105593267	106555657	962391	*	intergenic:3170	NA	NA	NA	hg19_genes_intergenic	482804
AR_ctr	CD4 mem	chr3	105746251	105746251	1	6	47	Open Sea	NA	NA	NA	NA	0.932313	0.810007	0.122306	0.20057	6.73e-07	1	0.857143	0.0574044	0.933333	0	0.211533	0	0.00166026	1257368	0	0	15.2857	15.7778	10	2	21	28	7	16	chr3	105592219	106955409	1363191	*	inter:3670	NA	NA	NA	hg19_cpg_inter	482804
AR_ctr	CD4 mem	chr5	172217144	172217144	1	3	69	Open Sea	NA	NA	NA	NA	0.818428	0.73976	0.0786679	0.143947	6.95e-07	1	0.3125	0.235394	1	0.333333	0.17545	0	0.00170799	1533522	0	0	17.2857	18.7222	3	3	29	36	6	15	chr5	172217005	172217294	290	*	enhancer:50172	NA	NA	NA	hg19_enhancers_fantom	44077
AR_ctr	CD4 mem	chr5	172217144	172217144	1	3	69	Open Sea	NA	NA	NA	NA	0.818428	0.73976	0.0786679	0.143947	6.95e-07	1	0.3125	0.235394	1	0.333333	0.17545	0	0.00170799	1533522	0	0	17.2857	18.7222	3	3	29	36	6	15	chr5	172203204	172256222	53019	*	intergenic:5035	NA	NA	NA	hg19_genes_intergenic	44077
AR_ctr	CD4 mem	chr5	172217144	172217144	1	3	69	Open Sea	NA	NA	NA	NA	0.818428	0.73976	0.0786679	0.143947	6.95e-07	1	0.3125	0.235394	1	0.333333	0.17545	0	0.00170799	1533522	0	0	17.2857	18.7222	3	3	29	36	6	15	chr5	172203607	172257145	53539	*	inter:5640	NA	NA	NA	hg19_cpg_inter	44077
AR_ctr	CD4 mem	chr9	139808045	139808045	1	3	49	Open Sea	NA	NA	NA	NA	0.89638	0.837142	0.059238	0.0975122	7e-07	1	0.666667	0.115215	0.958333	0.5	0.121074	0	0.0017183	1881749	0	0	16.5714	17.9444	10	4	27	26	7	17	chr9	139804447	139810992	6546	+	intron:294015	uc010nbu.3	7186	TRAF2	hg19_genes_introns	26859
AR_ctr	CD4 mem	chr9	139808045	139808045	1	3	49	Open Sea	NA	NA	NA	NA	0.89638	0.837142	0.059238	0.0975122	7e-07	1	0.666667	0.115215	0.958333	0.5	0.121074	0	0.0017183	1881749	0	0	16.5714	17.9444	10	4	27	26	7	17	chr9	139804447	139810992	6546	+	intron:294030	uc004cjv.3	7186	TRAF2	hg19_genes_introns	26859
AR_ctr	CD4 mem	chr9	139808045	139808045	1	3	49	Open Sea	NA	NA	NA	NA	0.89638	0.837142	0.059238	0.0975122	7e-07	1	0.666667	0.115215	0.958333	0.5	0.121074	0	0.0017183	1881749	0	0	16.5714	17.9444	10	4	27	26	7	17	chr9	139802684	139810992	8309	+	intron:294039	uc010nbw.3	7186	TRAF2	hg19_genes_introns	26859
AR_ctr	CD4 mem	chr9	139808045	139808045	1	3	49	Open Sea	NA	NA	NA	NA	0.89638	0.837142	0.059238	0.0975122	7e-07	1	0.666667	0.115215	0.958333	0.5	0.121074	0	0.0017183	1881749	0	0	16.5714	17.9444	10	4	27	26	7	17	chr9	139804447	139810992	6546	+	intron:294049	uc011mek.2	7186	TRAF2	hg19_genes_introns	26859
AR_ctr	CD4 mem	chr9	139808045	139808045	1	3	49	Open Sea	NA	NA	NA	NA	0.89638	0.837142	0.059238	0.0975122	7e-07	1	0.666667	0.115215	0.958333	0.5	0.121074	0	0.0017183	1881749	0	0	16.5714	17.9444	10	4	27	26	7	17	chr9	139806338	139808337	2000	*	shelf:19880	NA	NA	NA	hg19_cpg_shelves	26859
AR_ctr	CD4 mem	chr7	5613488	5613488	1	2	50	Open Sea	NA	NA	NA	NA	0.9079	0.839844	0.068056	0.111139	7.18e-07	1	0.807692	0.0729871	0.970588	0.695652	0.0893708	0	0.00175816	1763662	0	0	22.8571	25.0556	3	13	41	46	6	18	chr7	5575233	5627435	52203	*	intergenic:6100	NA	NA	NA	hg19_genes_intergenic	18946
AR_ctr	CD4 mem	chr7	5613488	5613488	1	2	50	Open Sea	NA	NA	NA	NA	0.9079	0.839844	0.068056	0.111139	7.18e-07	1	0.807692	0.0729871	0.970588	0.695652	0.0893708	0	0.00175816	1763662	0	0	22.8571	25.0556	3	13	41	46	6	18	chr7	5612106	5614105	2000	*	shelf:14488	NA	NA	NA	hg19_cpg_shelves	18946
AR_ctr	CD4 mem	chr2	227960353	227960353	1	3	57	Open Sea	NA	NA	NA	NA	0.561326	0.435176	0.12615	0.359939	7.21e-07	1	0.3	0.267567	0.75	0	0.170615	0	0.00176428	852595	0	1	12	10.1667	2	0	23	25	5	7	chr2	227959006	227963409	4404	-	intron:111464	uc021vxr.1	1286	COL4A4	hg19_genes_introns	68926
AR_ctr	CD4 mem	chr2	227960353	227960353	1	3	57	Open Sea	NA	NA	NA	NA	0.561326	0.435176	0.12615	0.359939	7.21e-07	1	0.3	0.267567	0.75	0	0.170615	0	0.00176428	852595	0	1	12	10.1667	2	0	23	25	5	7	chr2	227959006	227963409	4404	-	intron:111509	uc021vxs.1	1286	COL4A4	hg19_genes_introns	68926
AR_ctr	CD4 mem	chr2	227960353	227960353	1	3	57	Open Sea	NA	NA	NA	NA	0.561326	0.435176	0.12615	0.359939	7.21e-07	1	0.3	0.267567	0.75	0	0.170615	0	0.00176428	852595	0	1	12	10.1667	2	0	23	25	5	7	chr2	227705116	228024679	319564	*	inter:3002	NA	NA	NA	hg19_cpg_inter	68926
AR_ctr	CD4 mem	chr12	132903922	132903922	1	4	58	Shore	NA	NA	NA	NA	0.610243	0.37639	0.233853	0.682776	7.21e-07	1	0.413793	0.193131	0.6875	0	0.200509	0	0.0017651	528804	0	0	14.4286	20.1111	1	2	29	45	5	16	chr12	132903796	132904258	463	*	enhancer:15492	NA	NA	NA	hg19_enhancers_fantom	51944
AR_ctr	CD4 mem	chr12	132903922	132903922	1	4	58	Shore	NA	NA	NA	NA	0.610243	0.37639	0.233853	0.682776	7.21e-07	1	0.413793	0.193131	0.6875	0	0.200509	0	0.0017651	528804	0	0	14.4286	20.1111	1	2	29	45	5	16	chr12	132863017	132905551	42535	-	intron:404780	uc001ukc.4	50614	GALNT9	hg19_genes_introns	51944
AR_ctr	CD4 mem	chr12	132903922	132903922	1	4	58	Shore	NA	NA	NA	NA	0.610243	0.37639	0.233853	0.682776	7.21e-07	1	0.413793	0.193131	0.6875	0	0.200509	0	0.0017651	528804	0	0	14.4286	20.1111	1	2	29	45	5	16	chr12	132863017	132905551	42535	-	intron:404785	uc009zys.3	50614	GALNT9	hg19_genes_introns	51944
AR_ctr	CD4 mem	chr12	132903922	132903922	1	4	58	Shore	NA	NA	NA	NA	0.610243	0.37639	0.233853	0.682776	7.21e-07	1	0.413793	0.193131	0.6875	0	0.200509	0	0.0017651	528804	0	0	14.4286	20.1111	1	2	29	45	5	16	chr12	132903450	132905449	2000	*	shore:29872	NA	NA	NA	hg19_cpg_shores	51944
AR_ctr	CD4 mem	chr3	161696708	161696708	1	2	52	Open Sea	NA	NA	NA	NA	0.823614	0.771163	0.052452	0.0937576	7.33e-07	1	0.538462	0.174848	0.909091	0.444444	0.146823	0	0.0017917	1915118	0	1	12	19.1111	6	0	15	36	6	15	chr3	161221731	162437526	1215796	*	intergenic:3472	NA	NA	NA	hg19_genes_intergenic	482111
AR_ctr	CD4 mem	chr3	161696708	161696708	1	2	52	Open Sea	NA	NA	NA	NA	0.823614	0.771163	0.052452	0.0937576	7.33e-07	1	0.538462	0.174848	0.909091	0.444444	0.146823	0	0.0017917	1915118	0	1	12	19.1111	6	0	15	36	6	15	chr3	161094650	163718050	2623401	*	inter:3976	NA	NA	NA	hg19_cpg_inter	482111
AR_ctr	CD4 mem	chr16	88715985	88715985	1	2	58	Open Sea	NA	NA	NA	NA	0.897975	0.887708	0.0102671	0.0164065	7.38e-07	1	0.794118	0.0928	1	0.538462	0.105734	0	0.00180218	3073867	0	0	28.5714	36.5	2	13	63	67	6	18	chr16	88713090	88717089	4000	-	1to5kb:60031	uc002flc.1	NA	NA	hg19_genes_1to5kb	10983
AR_ctr	CD4 mem	chr16	88715985	88715985	1	2	58	Open Sea	NA	NA	NA	NA	0.897975	0.887708	0.0102671	0.0164065	7.38e-07	1	0.794118	0.0928	1	0.538462	0.105734	0	0.00180218	3073867	0	0	28.5714	36.5	2	13	63	67	6	18	chr16	88715363	88717448	2086	-	exon:549252	uc002fle.1	NA	NA	hg19_genes_exons	10983
AR_ctr	CD4 mem	chr16	88715985	88715985	1	2	58	Open Sea	NA	NA	NA	NA	0.897975	0.887708	0.0102671	0.0164065	7.38e-07	1	0.794118	0.0928	1	0.538462	0.105734	0	0.00180218	3073867	0	0	28.5714	36.5	2	13	63	67	6	18	chr16	88715363	88717448	2086	-	firstexon:60034	uc002fle.1	NA	NA	hg19_genes_firstexons	10983
AR_ctr	CD4 mem	chr16	88715985	88715985	1	2	58	Open Sea	NA	NA	NA	NA	0.897975	0.887708	0.0102671	0.0164065	7.38e-07	1	0.794118	0.0928	1	0.538462	0.105734	0	0.00180218	3073867	0	0	28.5714	36.5	2	13	63	67	6	18	chr16	88714523	88717363	2841	-	intron:489034	uc002flb.4	1535	CYBA	hg19_genes_introns	10983
AR_ctr	CD4 mem	chr16	88715985	88715985	1	2	58	Open Sea	NA	NA	NA	NA	0.897975	0.887708	0.0102671	0.0164065	7.38e-07	1	0.794118	0.0928	1	0.538462	0.105734	0	0.00180218	3073867	0	0	28.5714	36.5	2	13	63	67	6	18	chr16	88714523	88717363	2841	-	intron:489038	uc002fld.2	1535	CYBA	hg19_genes_introns	10983
AR_ctr	CD4 mem	chr16	88715985	88715985	1	2	58	Open Sea	NA	NA	NA	NA	0.897975	0.887708	0.0102671	0.0164065	7.38e-07	1	0.794118	0.0928	1	0.538462	0.105734	0	0.00180218	3073867	0	0	28.5714	36.5	2	13	63	67	6	18	chr16	88714523	88717363	2841	-	intron:489041	uc010chx.2	1535	CYBA	hg19_genes_introns	10983
AR_ctr	CD4 mem	chr16	88715985	88715985	1	2	58	Open Sea	NA	NA	NA	NA	0.897975	0.887708	0.0102671	0.0164065	7.38e-07	1	0.794118	0.0928	1	0.538462	0.105734	0	0.00180218	3073867	0	0	28.5714	36.5	2	13	63	67	6	18	chr16	88715363	88716656	1294	-	3UTR:45986	uc002fle.1	NA	NA	hg19_genes_3UTRs	10983
AR_ctr	CD4 mem	chr16	88715985	88715985	1	2	58	Open Sea	NA	NA	NA	NA	0.897975	0.887708	0.0102671	0.0164065	7.38e-07	1	0.794118	0.0928	1	0.538462	0.105734	0	0.00180218	3073867	0	0	28.5714	36.5	2	13	63	67	6	18	chr16	88714990	88716989	2000	*	shore:36390	NA	NA	NA	hg19_cpg_shores	10983
AR_ctr	CD4 mem	chr11	75330024	75330024	1	1	67	Open Sea	NA	NA	NA	NA	0.775992	0.610376	0.165616	0.341371	7.6e-07	1	0.4375	0.243684	0.95	0	0.241534	0	0.00185586	884734	0	0	14.5714	14.9444	1	6	24	32	5	13	chr11	75319368	75378509	59142	-	intron:365183	uc001owu.3	4135	MAP6	hg19_genes_introns	51196
AR_ctr	CD4 mem	chr11	75330024	75330024	1	1	67	Open Sea	NA	NA	NA	NA	0.775992	0.610376	0.165616	0.341371	7.6e-07	1	0.4375	0.243684	0.95	0	0.241534	0	0.00185586	884734	0	0	14.5714	14.9444	1	6	24	32	5	13	chr11	75319368	75378509	59142	-	intron:365185	uc001owv.3	4135	MAP6	hg19_genes_introns	51196
AR_ctr	CD4 mem	chr11	75330024	75330024	1	1	67	Open Sea	NA	NA	NA	NA	0.775992	0.610376	0.165616	0.341371	7.6e-07	1	0.4375	0.243684	0.95	0	0.241534	0	0.00185586	884734	0	0	14.5714	14.9444	1	6	24	32	5	13	chr11	75298816	75374416	75601	*	inter:11056	NA	NA	NA	hg19_cpg_inter	51196
AR_ctr	CD4 mem	chr17	36342628	36342628	1	2	50	Open Sea	NA	NA	NA	NA	0.878243	0.794576	0.0836668	0.142725	8e-07	1	0.666667	0.112389	0.933333	0.684211	0.0743029	0	0.0019418	1541107	0	1	13.8571	14.3889	3	0	22	34	5	15	chr17	36342239	36343238	1000	-	promoter:63293	uc021twb.1	NA	NA	hg19_genes_promoters	410
AR_ctr	CD4 mem	chr17	36342628	36342628	1	2	50	Open Sea	NA	NA	NA	NA	0.878243	0.794576	0.0836668	0.142725	8e-07	1	0.666667	0.112389	0.933333	0.684211	0.0743029	0	0.0019418	1541107	0	1	13.8571	14.3889	3	0	22	34	5	15	chr17	36338985	36342984	4000	+	1to5kb:61031	uc002hpt.2	NA	NA	hg19_genes_1to5kb	410
AR_ctr	CD4 mem	chr17	36342628	36342628	1	2	50	Open Sea	NA	NA	NA	NA	0.878243	0.794576	0.0836668	0.142725	8e-07	1	0.666667	0.112389	0.933333	0.684211	0.0743029	0	0.0019418	1541107	0	1	13.8571	14.3889	3	0	22	34	5	15	chr17	36339290	36343289	4000	+	1to5kb:61032	uc021twc.1	NA	NA	hg19_genes_1to5kb	410
AR_ctr	CD4 mem	chr17	36342628	36342628	1	2	50	Open Sea	NA	NA	NA	NA	0.878243	0.794576	0.0836668	0.142725	8e-07	1	0.666667	0.112389	0.933333	0.684211	0.0743029	0	0.0019418	1541107	0	1	13.8571	14.3889	3	0	22	34	5	15	chr17	36339539	36343538	4000	+	1to5kb:61033	uc002hpu.3	NA	NA	hg19_genes_1to5kb	410
AR_ctr	CD4 mem	chr17	36342628	36342628	1	2	50	Open Sea	NA	NA	NA	NA	0.878243	0.794576	0.0836668	0.142725	8e-07	1	0.666667	0.112389	0.933333	0.684211	0.0743029	0	0.0019418	1541107	0	1	13.8571	14.3889	3	0	22	34	5	15	chr17	36340778	36344777	4000	+	1to5kb:61034	uc002hpv.1	NA	NA	hg19_genes_1to5kb	410
AR_ctr	CD4 mem	chr17	36342628	36342628	1	2	50	Open Sea	NA	NA	NA	NA	0.878243	0.794576	0.0836668	0.142725	8e-07	1	0.666667	0.112389	0.933333	0.684211	0.0743029	0	0.0019418	1541107	0	1	13.8571	14.3889	3	0	22	34	5	15	chr17	36342584	36342632	49	-	CDS:460933	uc010wdl.1	729873	TBC1D3	hg19_genes_cds	410
AR_ctr	CD4 mem	chr17	36342628	36342628	1	2	50	Open Sea	NA	NA	NA	NA	0.878243	0.794576	0.0836668	0.142725	8e-07	1	0.666667	0.112389	0.933333	0.684211	0.0743029	0	0.0019418	1541107	0	1	13.8571	14.3889	3	0	22	34	5	15	chr17	36342584	36342632	49	-	CDS:460946	uc002hox.2	729873	TBC1D3	hg19_genes_cds	410
AR_ctr	CD4 mem	chr17	36342628	36342628	1	2	50	Open Sea	NA	NA	NA	NA	0.878243	0.794576	0.0836668	0.142725	8e-07	1	0.666667	0.112389	0.933333	0.684211	0.0743029	0	0.0019418	1541107	0	1	13.8571	14.3889	3	0	22	34	5	15	chr17	36342584	36342632	49	-	CDS:460958	uc002hpp.2	729873	TBC1D3	hg19_genes_cds	410
AR_ctr	CD4 mem	chr17	36342628	36342628	1	2	50	Open Sea	NA	NA	NA	NA	0.878243	0.794576	0.0836668	0.142725	8e-07	1	0.666667	0.112389	0.933333	0.684211	0.0743029	0	0.0019418	1541107	0	1	13.8571	14.3889	3	0	22	34	5	15	chr17	36342584	36342632	49	-	CDS:460971	uc010cvj.1	729873	TBC1D3	hg19_genes_cds	410
AR_ctr	CD4 mem	chr17	36342628	36342628	1	2	50	Open Sea	NA	NA	NA	NA	0.878243	0.794576	0.0836668	0.142725	8e-07	1	0.666667	0.112389	0.933333	0.684211	0.0743029	0	0.0019418	1541107	0	1	13.8571	14.3889	3	0	22	34	5	15	chr17	36342584	36342632	49	-	CDS:460978	uc010wdm.1	729873	TBC1D3	hg19_genes_cds	410
AR_ctr	CD4 mem	chr17	36342628	36342628	1	2	50	Open Sea	NA	NA	NA	NA	0.878243	0.794576	0.0836668	0.142725	8e-07	1	0.666667	0.112389	0.933333	0.684211	0.0743029	0	0.0019418	1541107	0	1	13.8571	14.3889	3	0	22	34	5	15	chr17	36342584	36342632	49	-	CDS:460991	uc002hpr.2	729873	TBC1D3	hg19_genes_cds	410
AR_ctr	CD4 mem	chr17	36342628	36342628	1	2	50	Open Sea	NA	NA	NA	NA	0.878243	0.794576	0.0836668	0.142725	8e-07	1	0.666667	0.112389	0.933333	0.684211	0.0743029	0	0.0019418	1541107	0	1	13.8571	14.3889	3	0	22	34	5	15	chr17	36342584	36342632	49	-	CDS:461004	uc010cvk.2	729873	TBC1D3	hg19_genes_cds	410
AR_ctr	CD4 mem	chr17	36342628	36342628	1	2	50	Open Sea	NA	NA	NA	NA	0.878243	0.794576	0.0836668	0.142725	8e-07	1	0.666667	0.112389	0.933333	0.684211	0.0743029	0	0.0019418	1541107	0	1	13.8571	14.3889	3	0	22	34	5	15	chr17	36342584	36342632	49	-	exon:578781	uc010wdl.1	729873	TBC1D3	hg19_genes_exons	410
AR_ctr	CD4 mem	chr17	36342628	36342628	1	2	50	Open Sea	NA	NA	NA	NA	0.878243	0.794576	0.0836668	0.142725	8e-07	1	0.666667	0.112389	0.933333	0.684211	0.0743029	0	0.0019418	1541107	0	1	13.8571	14.3889	3	0	22	34	5	15	chr17	36342584	36342632	49	-	exon:578794	uc002hox.2	729873	TBC1D3	hg19_genes_exons	410
AR_ctr	CD4 mem	chr17	36342628	36342628	1	2	50	Open Sea	NA	NA	NA	NA	0.878243	0.794576	0.0836668	0.142725	8e-07	1	0.666667	0.112389	0.933333	0.684211	0.0743029	0	0.0019418	1541107	0	1	13.8571	14.3889	3	0	22	34	5	15	chr17	36342584	36342632	49	-	exon:578807	uc002hpp.2	729873	TBC1D3	hg19_genes_exons	410
AR_ctr	CD4 mem	chr17	36342628	36342628	1	2	50	Open Sea	NA	NA	NA	NA	0.878243	0.794576	0.0836668	0.142725	8e-07	1	0.666667	0.112389	0.933333	0.684211	0.0743029	0	0.0019418	1541107	0	1	13.8571	14.3889	3	0	22	34	5	15	chr17	36342584	36342632	49	-	exon:578822	uc002hpq.2	729873	TBC1D3	hg19_genes_exons	410
AR_ctr	CD4 mem	chr17	36342628	36342628	1	2	50	Open Sea	NA	NA	NA	NA	0.878243	0.794576	0.0836668	0.142725	8e-07	1	0.666667	0.112389	0.933333	0.684211	0.0743029	0	0.0019418	1541107	0	1	13.8571	14.3889	3	0	22	34	5	15	chr17	36342584	36342632	49	-	exon:578836	uc010cvj.1	729873	TBC1D3	hg19_genes_exons	410
AR_ctr	CD4 mem	chr17	36342628	36342628	1	2	50	Open Sea	NA	NA	NA	NA	0.878243	0.794576	0.0836668	0.142725	8e-07	1	0.666667	0.112389	0.933333	0.684211	0.0743029	0	0.0019418	1541107	0	1	13.8571	14.3889	3	0	22	34	5	15	chr17	36342584	36342632	49	-	exon:578849	uc010wdm.1	729873	TBC1D3	hg19_genes_exons	410
AR_ctr	CD4 mem	chr17	36342628	36342628	1	2	50	Open Sea	NA	NA	NA	NA	0.878243	0.794576	0.0836668	0.142725	8e-07	1	0.666667	0.112389	0.933333	0.684211	0.0743029	0	0.0019418	1541107	0	1	13.8571	14.3889	3	0	22	34	5	15	chr17	36342584	36342632	49	-	exon:578865	uc002hpr.2	729873	TBC1D3	hg19_genes_exons	410
AR_ctr	CD4 mem	chr17	36342628	36342628	1	2	50	Open Sea	NA	NA	NA	NA	0.878243	0.794576	0.0836668	0.142725	8e-07	1	0.666667	0.112389	0.933333	0.684211	0.0743029	0	0.0019418	1541107	0	1	13.8571	14.3889	3	0	22	34	5	15	chr17	36342584	36342632	49	-	exon:578883	uc010cvk.2	729873	TBC1D3	hg19_genes_exons	410
AR_ctr	CD4 mem	chr17	36342628	36342628	1	2	50	Open Sea	NA	NA	NA	NA	0.878243	0.794576	0.0836668	0.142725	8e-07	1	0.666667	0.112389	0.933333	0.684211	0.0743029	0	0.0019418	1541107	0	1	13.8571	14.3889	3	0	22	34	5	15	chr17	36342433	36342832	400	-	intronexonboundary:538599	uc010wdl.1	729873	TBC1D3	hg19_genes_intronexonboundaries	410
AR_ctr	CD4 mem	chr17	36342628	36342628	1	2	50	Open Sea	NA	NA	NA	NA	0.878243	0.794576	0.0836668	0.142725	8e-07	1	0.666667	0.112389	0.933333	0.684211	0.0743029	0	0.0019418	1541107	0	1	13.8571	14.3889	3	0	22	34	5	15	chr17	36342433	36342832	400	-	intronexonboundary:538600	uc002hox.2	729873	TBC1D3	hg19_genes_intronexonboundaries	410
AR_ctr	CD4 mem	chr17	36342628	36342628	1	2	50	Open Sea	NA	NA	NA	NA	0.878243	0.794576	0.0836668	0.142725	8e-07	1	0.666667	0.112389	0.933333	0.684211	0.0743029	0	0.0019418	1541107	0	1	13.8571	14.3889	3	0	22	34	5	15	chr17	36342433	36342832	400	-	intronexonboundary:538601	uc002hpp.2	729873	TBC1D3	hg19_genes_intronexonboundaries	410
AR_ctr	CD4 mem	chr17	36342628	36342628	1	2	50	Open Sea	NA	NA	NA	NA	0.878243	0.794576	0.0836668	0.142725	8e-07	1	0.666667	0.112389	0.933333	0.684211	0.0743029	0	0.0019418	1541107	0	1	13.8571	14.3889	3	0	22	34	5	15	chr17	36342433	36342832	400	-	intronexonboundary:538602	uc002hpq.2	729873	TBC1D3	hg19_genes_intronexonboundaries	410
AR_ctr	CD4 mem	chr17	36342628	36342628	1	2	50	Open Sea	NA	NA	NA	NA	0.878243	0.794576	0.0836668	0.142725	8e-07	1	0.666667	0.112389	0.933333	0.684211	0.0743029	0	0.0019418	1541107	0	1	13.8571	14.3889	3	0	22	34	5	15	chr17	36342433	36342832	400	-	intronexonboundary:538603	uc010cvj.1	729873	TBC1D3	hg19_genes_intronexonboundaries	410
AR_ctr	CD4 mem	chr17	36342628	36342628	1	2	50	Open Sea	NA	NA	NA	NA	0.878243	0.794576	0.0836668	0.142725	8e-07	1	0.666667	0.112389	0.933333	0.684211	0.0743029	0	0.0019418	1541107	0	1	13.8571	14.3889	3	0	22	34	5	15	chr17	36342433	36342832	400	-	intronexonboundary:538604	uc010wdm.1	729873	TBC1D3	hg19_genes_intronexonboundaries	410
AR_ctr	CD4 mem	chr17	36342628	36342628	1	2	50	Open Sea	NA	NA	NA	NA	0.878243	0.794576	0.0836668	0.142725	8e-07	1	0.666667	0.112389	0.933333	0.684211	0.0743029	0	0.0019418	1541107	0	1	13.8571	14.3889	3	0	22	34	5	15	chr17	36342433	36342832	400	-	intronexonboundary:538605	uc002hpr.2	729873	TBC1D3	hg19_genes_intronexonboundaries	410
AR_ctr	CD4 mem	chr17	36342628	36342628	1	2	50	Open Sea	NA	NA	NA	NA	0.878243	0.794576	0.0836668	0.142725	8e-07	1	0.666667	0.112389	0.933333	0.684211	0.0743029	0	0.0019418	1541107	0	1	13.8571	14.3889	3	0	22	34	5	15	chr17	36342433	36342832	400	-	intronexonboundary:538606	uc010cvk.2	729873	TBC1D3	hg19_genes_intronexonboundaries	410
AR_ctr	CD4 mem	chr17	36342628	36342628	1	2	50	Open Sea	NA	NA	NA	NA	0.878243	0.794576	0.0836668	0.142725	8e-07	1	0.666667	0.112389	0.933333	0.684211	0.0743029	0	0.0019418	1541107	0	1	13.8571	14.3889	3	0	22	34	5	15	chr17	36342385	36342784	400	-	exonintronboundary:543398	uc010wdl.1	729873	TBC1D3	hg19_genes_exonintronboundaries	410
AR_ctr	CD4 mem	chr17	36342628	36342628	1	2	50	Open Sea	NA	NA	NA	NA	0.878243	0.794576	0.0836668	0.142725	8e-07	1	0.666667	0.112389	0.933333	0.684211	0.0743029	0	0.0019418	1541107	0	1	13.8571	14.3889	3	0	22	34	5	15	chr17	36342385	36342784	400	-	exonintronboundary:543399	uc002hox.2	729873	TBC1D3	hg19_genes_exonintronboundaries	410
AR_ctr	CD4 mem	chr17	36342628	36342628	1	2	50	Open Sea	NA	NA	NA	NA	0.878243	0.794576	0.0836668	0.142725	8e-07	1	0.666667	0.112389	0.933333	0.684211	0.0743029	0	0.0019418	1541107	0	1	13.8571	14.3889	3	0	22	34	5	15	chr17	36342385	36342784	400	-	exonintronboundary:543400	uc002hpp.2	729873	TBC1D3	hg19_genes_exonintronboundaries	410
AR_ctr	CD4 mem	chr17	36342628	36342628	1	2	50	Open Sea	NA	NA	NA	NA	0.878243	0.794576	0.0836668	0.142725	8e-07	1	0.666667	0.112389	0.933333	0.684211	0.0743029	0	0.0019418	1541107	0	1	13.8571	14.3889	3	0	22	34	5	15	chr17	36342385	36342784	400	-	exonintronboundary:543401	uc002hpq.2	729873	TBC1D3	hg19_genes_exonintronboundaries	410
AR_ctr	CD4 mem	chr17	36342628	36342628	1	2	50	Open Sea	NA	NA	NA	NA	0.878243	0.794576	0.0836668	0.142725	8e-07	1	0.666667	0.112389	0.933333	0.684211	0.0743029	0	0.0019418	1541107	0	1	13.8571	14.3889	3	0	22	34	5	15	chr17	36342385	36342784	400	-	exonintronboundary:543402	uc010cvj.1	729873	TBC1D3	hg19_genes_exonintronboundaries	410
AR_ctr	CD4 mem	chr17	36342628	36342628	1	2	50	Open Sea	NA	NA	NA	NA	0.878243	0.794576	0.0836668	0.142725	8e-07	1	0.666667	0.112389	0.933333	0.684211	0.0743029	0	0.0019418	1541107	0	1	13.8571	14.3889	3	0	22	34	5	15	chr17	36342385	36342784	400	-	exonintronboundary:543403	uc010wdm.1	729873	TBC1D3	hg19_genes_exonintronboundaries	410
AR_ctr	CD4 mem	chr17	36342628	36342628	1	2	50	Open Sea	NA	NA	NA	NA	0.878243	0.794576	0.0836668	0.142725	8e-07	1	0.666667	0.112389	0.933333	0.684211	0.0743029	0	0.0019418	1541107	0	1	13.8571	14.3889	3	0	22	34	5	15	chr17	36342385	36342784	400	-	exonintronboundary:543404	uc002hpr.2	729873	TBC1D3	hg19_genes_exonintronboundaries	410
AR_ctr	CD4 mem	chr17	36342628	36342628	1	2	50	Open Sea	NA	NA	NA	NA	0.878243	0.794576	0.0836668	0.142725	8e-07	1	0.666667	0.112389	0.933333	0.684211	0.0743029	0	0.0019418	1541107	0	1	13.8571	14.3889	3	0	22	34	5	15	chr17	36342385	36342784	400	-	exonintronboundary:543405	uc010cvk.2	729873	TBC1D3	hg19_genes_exonintronboundaries	410
AR_ctr	CD4 mem	chr17	36342628	36342628	1	2	50	Open Sea	NA	NA	NA	NA	0.878243	0.794576	0.0836668	0.142725	8e-07	1	0.666667	0.112389	0.933333	0.684211	0.0743029	0	0.0019418	1541107	0	1	13.8571	14.3889	3	0	22	34	5	15	chr17	36340799	36342798	2000	*	shelf:32375	NA	NA	NA	hg19_cpg_shelves	410
AR_ctr	CD4 mem	chr16	86804789	86804789	1	1	39	Open Sea	NA	NA	NA	NA	0.825615	0.748023	0.0775921	0.140597	8.05e-07	1	0.727273	0.120575	0.952381	0	0.212777	0	0.00195413	1552923	0	0	19.5714	20.1111	8	1	49	35	6	16	chr16	86760566	87117167	356602	*	intergenic:12544	NA	NA	NA	hg19_genes_intergenic	192673
AR_ctr	CD4 mem	chr16	86804789	86804789	1	1	39	Open Sea	NA	NA	NA	NA	0.825615	0.748023	0.0775921	0.140597	8.05e-07	1	0.727273	0.120575	0.952381	0	0.212777	0	0.00195413	1552923	0	0	19.5714	20.1111	8	1	49	35	6	16	chr16	86719326	86865862	146537	*	inter:14763	NA	NA	NA	hg19_cpg_inter	192673
AR_ctr	CD4 mem	chr14	93569689	93569689	1	2	58	Open Sea	NA	NA	NA	NA	0.834057	0.793782	0.0402749	0.070536	8.2e-07	1	0.636364	0.136715	1	0.4	0.133306	0	0.0019855	2162716	0	0	11.4286	14.6667	4	5	20	27	5	14	chr14	93542965	93581413	38449	-	intron:435018	uc001ybe.2	3705	ITPK1	hg19_genes_introns	35891
AR_ctr	CD4 mem	chr14	93569689	93569689	1	2	58	Open Sea	NA	NA	NA	NA	0.834057	0.793782	0.0402749	0.070536	8.2e-07	1	0.636364	0.136715	1	0.4	0.133306	0	0.0019855	2162716	0	0	11.4286	14.6667	4	5	20	27	5	14	chr14	93483147	93581413	98267	-	intron:435027	uc001ybf.3	3705	ITPK1	hg19_genes_introns	35891
AR_ctr	CD4 mem	chr14	93569689	93569689	1	2	58	Open Sea	NA	NA	NA	NA	0.834057	0.793782	0.0402749	0.070536	8.2e-07	1	0.636364	0.136715	1	0.4	0.133306	0	0.0019855	2162716	0	0	11.4286	14.6667	4	5	20	27	5	14	chr14	93542965	93581413	38449	-	intron:435036	uc001ybg.3	3705	ITPK1	hg19_genes_introns	35891
AR_ctr	CD4 mem	chr14	93569689	93569689	1	2	58	Open Sea	NA	NA	NA	NA	0.834057	0.793782	0.0402749	0.070536	8.2e-07	1	0.636364	0.136715	1	0.4	0.133306	0	0.0019855	2162716	0	0	11.4286	14.6667	4	5	20	27	5	14	chr14	93542965	93581413	38449	-	intron:435046	uc001ybh.3	3705	ITPK1	hg19_genes_introns	35891
AR_ctr	CD4 mem	chr14	93569689	93569689	1	2	58	Open Sea	NA	NA	NA	NA	0.834057	0.793782	0.0402749	0.070536	8.2e-07	1	0.636364	0.136715	1	0.4	0.133306	0	0.0019855	2162716	0	0	11.4286	14.6667	4	5	20	27	5	14	chr14	93393900	93577083	183184	*	inter:13138	NA	NA	NA	hg19_cpg_inter	35891
AR_ctr	CD4 mem	chr19	739538	739538	1	2	52	Open Sea	NA	NA	NA	NA	0.85286	0.805727	0.0471323	0.0810389	8.2e-07	1	0.545455	0.172015	1	0.533333	0.131325	0	0.0019855	2045036	0	0	17.7143	21.3889	2	8	35	59	6	17	chr19	736079	740351	4273	+	intron:535580	uc002lpm.1	5064	PALM	hg19_genes_introns	11606
AR_ctr	CD4 mem	chr19	739538	739538	1	2	52	Open Sea	NA	NA	NA	NA	0.85286	0.805727	0.0471323	0.0810389	8.2e-07	1	0.545455	0.172015	1	0.533333	0.131325	0	0.0019855	2045036	0	0	17.7143	21.3889	2	8	35	59	6	17	chr19	736079	746284	10206	+	intron:535588	uc002lpn.1	5064	PALM	hg19_genes_introns	11606
AR_ctr	CD4 mem	chr19	739538	739538	1	2	52	Open Sea	NA	NA	NA	NA	0.85286	0.805727	0.0471323	0.0810389	8.2e-07	1	0.545455	0.172015	1	0.533333	0.131325	0	0.0019855	2045036	0	0	17.7143	21.3889	2	8	35	59	6	17	chr19	736079	740351	4273	+	intron:535592	uc010xfu.1	5064	PALM	hg19_genes_introns	11606
AR_ctr	CD4 mem	chr19	739538	739538	1	2	52	Open Sea	NA	NA	NA	NA	0.85286	0.805727	0.0471323	0.0810389	8.2e-07	1	0.545455	0.172015	1	0.533333	0.131325	0	0.0019855	2045036	0	0	17.7143	21.3889	2	8	35	59	6	17	chr19	736427	740196	3770	*	shore:40607	NA	NA	NA	hg19_cpg_shores	11606
AR_ctr	CD4 mem	chr11	65512499	65512499	1	2	61	Open Sea	NA	NA	NA	NA	1	0.928294	0.0717057	0.106243	8.32e-07	1	1	0	1	0.76	0.0661629	0	0.00201351	1802336	0	0	16.4286	28.7778	3	7	35	62	6	17	chr11	65493410	65541368	47959	*	intergenic:9384	NA	NA	NA	hg19_genes_intergenic	32407
AR_ctr	CD4 mem	chr11	65512499	65512499	1	2	61	Open Sea	NA	NA	NA	NA	1	0.928294	0.0717057	0.106243	8.32e-07	1	1	0	1	0.76	0.0661629	0	0.00201351	1802336	0	0	16.4286	28.7778	3	7	35	62	6	17	chr11	65492349	65543499	51151	*	inter:10885	NA	NA	NA	hg19_cpg_inter	32407
AR_ctr	CD4 mem	chr9	15285199	15285199	1	8	68	Open Sea	NA	NA	NA	NA	0.851282	0.704713	0.146569	0.269122	9.05e-07	1	0.692308	0.127199	0.933333	0	0.200872	0	0.0021741	1038768	0	0	11.8571	12.8889	6	4	16	21	6	16	chr9	15267947	15307081	39135	-	intron:296005	uc003zlr.2	158219	TTC39B	hg19_genes_introns	137581
AR_ctr	CD4 mem	chr9	15285199	15285199	1	8	68	Open Sea	NA	NA	NA	NA	0.851282	0.704713	0.146569	0.269122	9.05e-07	1	0.692308	0.127199	0.933333	0	0.200872	0	0.0021741	1038768	0	0	11.8571	12.8889	6	4	16	21	6	16	chr9	15267947	15307081	39135	-	intron:296024	uc010mie.2	158219	TTC39B	hg19_genes_introns	137581
AR_ctr	CD4 mem	chr9	15285199	15285199	1	8	68	Open Sea	NA	NA	NA	NA	0.851282	0.704713	0.146569	0.269122	9.05e-07	1	0.692308	0.127199	0.933333	0	0.200872	0	0.0021741	1038768	0	0	11.8571	12.8889	6	4	16	21	6	16	chr9	15267947	15307081	39135	-	intron:296042	uc011lmq.2	158219	TTC39B	hg19_genes_introns	137581
AR_ctr	CD4 mem	chr9	15285199	15285199	1	8	68	Open Sea	NA	NA	NA	NA	0.851282	0.704713	0.146569	0.269122	9.05e-07	1	0.692308	0.127199	0.933333	0	0.200872	0	0.0021741	1038768	0	0	11.8571	12.8889	6	4	16	21	6	16	chr9	15267947	15307081	39135	-	intron:296059	uc011lmr.2	158219	TTC39B	hg19_genes_introns	137581
AR_ctr	CD4 mem	chr9	15285199	15285199	1	8	68	Open Sea	NA	NA	NA	NA	0.851282	0.704713	0.146569	0.269122	9.05e-07	1	0.692308	0.127199	0.933333	0	0.200872	0	0.0021741	1038768	0	0	11.8571	12.8889	6	4	16	21	6	16	chr9	15267947	15307081	39135	-	intron:296073	uc010mif.2	158219	TTC39B	hg19_genes_introns	137581
AR_ctr	CD4 mem	chr9	15285199	15285199	1	8	68	Open Sea	NA	NA	NA	NA	0.851282	0.704713	0.146569	0.269122	9.05e-07	1	0.692308	0.127199	0.933333	0	0.200872	0	0.0021741	1038768	0	0	11.8571	12.8889	6	4	16	21	6	16	chr9	15267947	15307081	39135	-	intron:296109	uc011lms.2	158219	TTC39B	hg19_genes_introns	137581
AR_ctr	CD4 mem	chr9	15285199	15285199	1	8	68	Open Sea	NA	NA	NA	NA	0.851282	0.704713	0.146569	0.269122	9.05e-07	1	0.692308	0.127199	0.933333	0	0.200872	0	0.0021741	1038768	0	0	11.8571	12.8889	6	4	16	21	6	16	chr9	15236938	15302722	65785	*	inter:8658	NA	NA	NA	hg19_cpg_inter	137581
AR_ctr	CD4 mem	chr19	7921198	7921198	1	4	61	Open Sea	NA	NA	NA	NA	0.886267	0.782183	0.104084	0.178094	9.19e-07	1	0.777778	0.0955852	0.909091	0.555556	0.101065	0	0.00220386	1352365	0	0	18.8571	14.9444	9	3	39	30	6	13	chr19	7920955	7923076	2122	+	intron:538356	uc002min.3	115704	EVI5L	hg19_genes_introns	4877
AR_ctr	CD4 mem	chr19	7921198	7921198	1	4	61	Open Sea	NA	NA	NA	NA	0.886267	0.782183	0.104084	0.178094	9.19e-07	1	0.777778	0.0955852	0.909091	0.555556	0.101065	0	0.00220386	1352365	0	0	18.8571	14.9444	9	3	39	30	6	13	chr19	7920955	7921977	1023	+	intron:538373	uc010xjz.2	115704	EVI5L	hg19_genes_introns	4877
AR_ctr	CD4 mem	chr19	7921198	7921198	1	4	61	Open Sea	NA	NA	NA	NA	0.886267	0.782183	0.104084	0.178094	9.19e-07	1	0.777778	0.0955852	0.909091	0.555556	0.101065	0	0.00220386	1352365	0	0	18.8571	14.9444	9	3	39	30	6	13	chr19	7920955	7921864	910	+	intron:538386	uc002mio.1	115704	EVI5L	hg19_genes_introns	4877
AR_ctr	CD4 mem	chr19	7921198	7921198	1	4	61	Open Sea	NA	NA	NA	NA	0.886267	0.782183	0.104084	0.178094	9.19e-07	1	0.777778	0.0955852	0.909091	0.555556	0.101065	0	0.00220386	1352365	0	0	18.8571	14.9444	9	3	39	30	6	13	chr19	7917969	7922590	4622	*	inter:16639	NA	NA	NA	hg19_cpg_inter	4877
AR_ctr	CD4 mem	chr22	28152369	28152369	1	8	70	Open Sea	NA	NA	NA	NA	0.948923	0.905881	0.0430423	0.0662553	9.23e-07	1	0.875	0.0443916	1	0.714286	0.0786681	0	0.00221188	2217270	0	0	20.5714	27.1667	2	13	32	48	5	18	chr22	28147085	28187734	40650	-	intron:600490	uc010gvg.4	4330	MN1	hg19_genes_introns	162993
AR_ctr	CD4 mem	chr22	28152369	28152369	1	8	70	Open Sea	NA	NA	NA	NA	0.948923	0.905881	0.0430423	0.0662553	9.23e-07	1	0.875	0.0443916	1	0.714286	0.0786681	0	0.00221188	2217270	0	0	20.5714	27.1667	2	13	32	48	5	18	chr22	28147085	28192750	45666	-	intron:600491	uc003adj.3	4330	MN1	hg19_genes_introns	162993
AR_ctr	CD4 mem	chr22	28152369	28152369	1	8	70	Open Sea	NA	NA	NA	NA	0.948923	0.905881	0.0430423	0.0662553	9.23e-07	1	0.875	0.0443916	1	0.714286	0.0786681	0	0.00221188	2217270	0	0	20.5714	27.1667	2	13	32	48	5	18	chr22	28078245	28188793	110549	*	inter:18725	NA	NA	NA	hg19_cpg_inter	162993
AR_ctr	CD4 mem	chr10	2934082	2934082	1	3	38	Open Sea	NA	NA	NA	NA	0.834982	0.671604	0.163378	0.309987	9.38e-07	0.941176	0.735294	0.0823788	0.823529	0.465517	0.0985437	0	0.00224772	946418	0	0	48	45.3333	17	31	69	76	7	18	chr10	2362269	3104711	742443	*	intergenic:8220	NA	NA	NA	hg19_genes_intergenic	175628
AR_ctr	CD4 mem	chr10	2934082	2934082	1	3	38	Open Sea	NA	NA	NA	NA	0.834982	0.671604	0.163378	0.309987	9.38e-07	0.941176	0.735294	0.0823788	0.823529	0.465517	0.0985437	0	0.00224772	946418	0	0	48	45.3333	17	31	69	76	7	18	chr10	2932448	2934447	2000	*	shore:23281	NA	NA	NA	hg19_cpg_shores	175628
AR_ctr	CD4 mem	chr1	153599480	153599480	1	4	55	Open Sea	NA	NA	NA	NA	0.921695	0.783001	0.138693	0.232533	9.53e-07	1	0.806452	0.0696221	0.978261	0.333333	0.166534	0	0.00228153	1144396	0	0	44.1429	46.1111	2	3	82	97	6	17	chr1	153595873	153599872	4000	+	1to5kb:2508	uc001fck.1	6271	S100A1	hg19_genes_1to5kb	1391
AR_ctr	CD4 mem	chr1	153599480	153599480	1	4	55	Open Sea	NA	NA	NA	NA	0.921695	0.783001	0.138693	0.232533	9.53e-07	1	0.806452	0.0696221	0.978261	0.333333	0.166534	0	0.00228153	1144396	0	0	44.1429	46.1111	2	3	82	97	6	17	chr1	153595873	153599872	4000	+	1to5kb:2509	uc001fcl.1	6271	S100A1	hg19_genes_1to5kb	1391
AR_ctr	CD4 mem	chr1	153599480	153599480	1	4	55	Open Sea	NA	NA	NA	NA	0.921695	0.783001	0.138693	0.232533	9.53e-07	1	0.806452	0.0696221	0.978261	0.333333	0.166534	0	0.00228153	1144396	0	0	44.1429	46.1111	2	3	82	97	6	17	chr1	153599427	153599539	113	-	5UTR:9254	uc001fcf.4	6284	S100A13	hg19_genes_5UTRs	1391
AR_ctr	CD4 mem	chr1	153599480	153599480	1	4	55	Open Sea	NA	NA	NA	NA	0.921695	0.783001	0.138693	0.232533	9.53e-07	1	0.806452	0.0696221	0.978261	0.333333	0.166534	0	0.00228153	1144396	0	0	44.1429	46.1111	2	3	82	97	6	17	chr1	153599427	153599539	113	-	5UTR:9259	uc009woh.3	6284	S100A13	hg19_genes_5UTRs	1391
AR_ctr	CD4 mem	chr1	153599480	153599480	1	4	55	Open Sea	NA	NA	NA	NA	0.921695	0.783001	0.138693	0.232533	9.53e-07	1	0.806452	0.0696221	0.978261	0.333333	0.166534	0	0.00228153	1144396	0	0	44.1429	46.1111	2	3	82	97	6	17	chr1	153599427	153599539	113	-	exon:60195	uc001fcf.4	6284	S100A13	hg19_genes_exons	1391
AR_ctr	CD4 mem	chr1	153599480	153599480	1	4	55	Open Sea	NA	NA	NA	NA	0.921695	0.783001	0.138693	0.232533	9.53e-07	1	0.806452	0.0696221	0.978261	0.333333	0.166534	0	0.00228153	1144396	0	0	44.1429	46.1111	2	3	82	97	6	17	chr1	153599427	153599539	113	-	exon:60202	uc009woh.3	6284	S100A13	hg19_genes_exons	1391
AR_ctr	CD4 mem	chr1	153599480	153599480	1	4	55	Open Sea	NA	NA	NA	NA	0.921695	0.783001	0.138693	0.232533	9.53e-07	1	0.806452	0.0696221	0.978261	0.333333	0.166534	0	0.00228153	1144396	0	0	44.1429	46.1111	2	3	82	97	6	17	chr1	153599427	153599539	113	-	firstexon:6452	uc001fcf.4	6284	S100A13	hg19_genes_firstexons	1391
AR_ctr	CD4 mem	chr1	153599480	153599480	1	4	55	Open Sea	NA	NA	NA	NA	0.921695	0.783001	0.138693	0.232533	9.53e-07	1	0.806452	0.0696221	0.978261	0.333333	0.166534	0	0.00228153	1144396	0	0	44.1429	46.1111	2	3	82	97	6	17	chr1	153599010	153599614	605	-	intron:53745	uc001fcg.3	6284	S100A13	hg19_genes_introns	1391
AR_ctr	CD4 mem	chr1	153599480	153599480	1	4	55	Open Sea	NA	NA	NA	NA	0.921695	0.783001	0.138693	0.232533	9.53e-07	1	0.806452	0.0696221	0.978261	0.333333	0.166534	0	0.00228153	1144396	0	0	44.1429	46.1111	2	3	82	97	6	17	chr1	153599010	153599958	949	-	intron:53750	uc001fch.3	6284	S100A13	hg19_genes_introns	1391
AR_ctr	CD4 mem	chr1	153599480	153599480	1	4	55	Open Sea	NA	NA	NA	NA	0.921695	0.783001	0.138693	0.232533	9.53e-07	1	0.806452	0.0696221	0.978261	0.333333	0.166534	0	0.00228153	1144396	0	0	44.1429	46.1111	2	3	82	97	6	17	chr1	153599010	153599958	949	-	intron:53752	uc001fci.3	6284	S100A13	hg19_genes_introns	1391
AR_ctr	CD4 mem	chr1	153599480	153599480	1	4	55	Open Sea	NA	NA	NA	NA	0.921695	0.783001	0.138693	0.232533	9.53e-07	1	0.806452	0.0696221	0.978261	0.333333	0.166534	0	0.00228153	1144396	0	0	44.1429	46.1111	2	3	82	97	6	17	chr1	153599010	153603486	4477	-	intron:53755	uc001fcj.3	6284	S100A13	hg19_genes_introns	1391
AR_ctr	CD4 mem	chr1	153599480	153599480	1	4	55	Open Sea	NA	NA	NA	NA	0.921695	0.783001	0.138693	0.232533	9.53e-07	1	0.806452	0.0696221	0.978261	0.333333	0.166534	0	0.00228153	1144396	0	0	44.1429	46.1111	2	3	82	97	6	17	chr1	153599340	153599739	400	-	intronexonboundary:55163	uc001fcf.4	6284	S100A13	hg19_genes_intronexonboundaries	1391
AR_ctr	CD4 mem	chr1	153599480	153599480	1	4	55	Open Sea	NA	NA	NA	NA	0.921695	0.783001	0.138693	0.232533	9.53e-07	1	0.806452	0.0696221	0.978261	0.333333	0.166534	0	0.00228153	1144396	0	0	44.1429	46.1111	2	3	82	97	6	17	chr1	153599340	153599739	400	-	intronexonboundary:55164	uc009woh.3	6284	S100A13	hg19_genes_intronexonboundaries	1391
AR_ctr	CD4 mem	chr1	153599480	153599480	1	4	55	Open Sea	NA	NA	NA	NA	0.921695	0.783001	0.138693	0.232533	9.53e-07	1	0.806452	0.0696221	0.978261	0.333333	0.166534	0	0.00228153	1144396	0	0	44.1429	46.1111	2	3	82	97	6	17	chr1	153599228	153599627	400	-	exonintronboundary:57303	uc001fcf.4	6284	S100A13	hg19_genes_exonintronboundaries	1391
AR_ctr	CD4 mem	chr1	153599480	153599480	1	4	55	Open Sea	NA	NA	NA	NA	0.921695	0.783001	0.138693	0.232533	9.53e-07	1	0.806452	0.0696221	0.978261	0.333333	0.166534	0	0.00228153	1144396	0	0	44.1429	46.1111	2	3	82	97	6	17	chr1	153599228	153599627	400	-	exonintronboundary:57304	uc009woh.3	6284	S100A13	hg19_genes_exonintronboundaries	1391
AR_ctr	CD4 mem	chr1	153599480	153599480	1	4	55	Open Sea	NA	NA	NA	NA	0.921695	0.783001	0.138693	0.232533	9.53e-07	1	0.806452	0.0696221	0.978261	0.333333	0.166534	0	0.00228153	1144396	0	0	44.1429	46.1111	2	3	82	97	6	17	chr1	153599416	153599815	400	-	exonintronboundary:57305	uc001fcg.3	6284	S100A13	hg19_genes_exonintronboundaries	1391
AR_ctr	CD4 mem	chr1	153599480	153599480	1	4	55	Open Sea	NA	NA	NA	NA	0.921695	0.783001	0.138693	0.232533	9.53e-07	1	0.806452	0.0696221	0.978261	0.333333	0.166534	0	0.00228153	1144396	0	0	44.1429	46.1111	2	3	82	97	6	17	chr1	153599416	153599815	400	-	exonintronboundary:57306	uc009woh.3	6284	S100A13	hg19_genes_exonintronboundaries	1391
AR_ctr	CD4 mem	chr1	153599480	153599480	1	4	55	Open Sea	NA	NA	NA	NA	0.921695	0.783001	0.138693	0.232533	9.53e-07	1	0.806452	0.0696221	0.978261	0.333333	0.166534	0	0.00228153	1144396	0	0	44.1429	46.1111	2	3	82	97	6	17	chr1	153512841	153602177	89337	*	inter:1246	NA	NA	NA	hg19_cpg_inter	1391
AR_ctr	CD4 mem	chr12	15501548	15501548	1	6	49	Open Sea	NA	NA	NA	NA	0.915664	0.851698	0.0639664	0.103307	9.76e-07	1	0.818182	0.0682329	0.956522	0.5	0.117022	0	0.00233062	1828688	0	0	19.8571	22.6667	11	2	30	42	7	15	chr12	15475736	15636907	161172	+	intron:373911	uc001rcu.2	5800	PTPRO	hg19_genes_introns	26356
AR_ctr	CD4 mem	chr12	15501548	15501548	1	6	49	Open Sea	NA	NA	NA	NA	0.915664	0.851698	0.0639664	0.103307	9.76e-07	1	0.818182	0.0682329	0.956522	0.5	0.117022	0	0.00233062	1828688	0	0	19.8571	22.6667	11	2	30	42	7	15	chr12	15475736	15636907	161172	+	intron:373919	uc001rcv.2	5800	PTPRO	hg19_genes_introns	26356
AR_ctr	CD4 mem	chr12	15501548	15501548	1	6	49	Open Sea	NA	NA	NA	NA	0.915664	0.851698	0.0639664	0.103307	9.76e-07	1	0.818182	0.0682329	0.956522	0.5	0.117022	0	0.00233062	1828688	0	0	19.8571	22.6667	11	2	30	42	7	15	chr12	15475736	15636907	161172	+	intron:373945	uc001rcw.2	5800	PTPRO	hg19_genes_introns	26356
AR_ctr	CD4 mem	chr12	15501548	15501548	1	6	49	Open Sea	NA	NA	NA	NA	0.915664	0.851698	0.0639664	0.103307	9.76e-07	1	0.818182	0.0682329	0.956522	0.5	0.117022	0	0.00233062	1828688	0	0	19.8571	22.6667	11	2	30	42	7	15	chr12	15479902	15937718	457817	*	inter:11526	NA	NA	NA	hg19_cpg_inter	26356
AR_ctr	CD4 mem	chr1	14259035	14259035	1	8	57	Open Sea	NA	NA	NA	NA	0.865784	0.769336	0.0964482	0.16833	9.97e-07	1	0.75	0.106952	0.9	0.25	0.149176	0	0.00237432	1396655	0	1	11.5714	11.7778	8	0	15	26	5	12	chr1	14151575	14920212	768638	*	intergenic:146	NA	NA	NA	hg19_genes_intergenic	112572
AR_ctr	CD4 mem	chr1	14259035	14259035	1	8	57	Open Sea	NA	NA	NA	NA	0.865784	0.769336	0.0964482	0.16833	9.97e-07	1	0.75	0.106952	0.9	0.25	0.149176	0	0.00237432	1396655	0	1	11.5714	11.7778	8	0	15	26	5	12	chr1	14223738	14920610	696873	*	inter:248	NA	NA	NA	hg19_cpg_inter	112572
AR_ctr	CD4 mem	chr3	171854603	171854603	1	4	61	Open Sea	NA	NA	NA	NA	0.885852	0.782857	0.102995	0.1762	1e-06	1	0.818182	0.0789231	0.944444	0.583333	0.103863	0	0.00238855	1360755	0	0	10.7143	11.8889	6	5	14	19	5	12	chr3	171851337	171904501	53165	+	intron:129239	uc003fhx.3	64778	FNDC3B	hg19_genes_introns	3341
AR_ctr	CD4 mem	chr3	171854603	171854603	1	4	61	Open Sea	NA	NA	NA	NA	0.885852	0.782857	0.102995	0.1762	1e-06	1	0.818182	0.0789231	0.944444	0.583333	0.103863	0	0.00238855	1360755	0	0	10.7143	11.8889	6	5	14	19	5	12	chr3	171851337	171944660	93324	+	intron:129242	uc003fhy.3	64778	FNDC3B	hg19_genes_introns	3341
AR_ctr	CD4 mem	chr3	171854603	171854603	1	4	61	Open Sea	NA	NA	NA	NA	0.885852	0.782857	0.102995	0.1762	1e-06	1	0.818182	0.0789231	0.944444	0.583333	0.103863	0	0.00238855	1360755	0	0	10.7143	11.8889	6	5	14	19	5	12	chr3	171851337	171944660	93324	+	intron:129267	uc003fhz.4	64778	FNDC3B	hg19_genes_introns	3341
AR_ctr	CD4 mem	chr3	171854603	171854603	1	4	61	Open Sea	NA	NA	NA	NA	0.885852	0.782857	0.102995	0.1762	1e-06	1	0.818182	0.0789231	0.944444	0.583333	0.103863	0	0.00238855	1360755	0	0	10.7143	11.8889	6	5	14	19	5	12	chr3	171851337	171944660	93324	+	intron:129290	uc003fia.3	64778	FNDC3B	hg19_genes_introns	3341
AR_ctr	CD4 mem	chr3	171854603	171854603	1	4	61	Open Sea	NA	NA	NA	NA	0.885852	0.782857	0.102995	0.1762	1e-06	1	0.818182	0.0789231	0.944444	0.583333	0.103863	0	0.00238855	1360755	0	0	10.7143	11.8889	6	5	14	19	5	12	chr3	171762725	172161372	398648	*	inter:3999	NA	NA	NA	hg19_cpg_inter	3341
AR_ctr	CD4 mem	chr11	83992060	83992060	1	5	51	Open Sea	NA	NA	NA	NA	0.947392	0.896346	0.0510461	0.079048	1.04e-06	1	0.892857	0.042386	0.966667	0.666667	0.0706121	0	0.00246756	2065450	0	0	21.5714	21.1111	11	3	36	34	7	17	chr11	83962335	84027867	65533	-	intron:365694	uc021qof.1	1740	DLG2	hg19_genes_introns	994888
AR_ctr	CD4 mem	chr11	83992060	83992060	1	5	51	Open Sea	NA	NA	NA	NA	0.947392	0.896346	0.0510461	0.079048	1.04e-06	1	0.892857	0.042386	0.966667	0.666667	0.0706121	0	0.00246756	2065450	0	0	21.5714	21.1111	11	3	36	34	7	17	chr11	83962335	84245612	283278	-	intron:365715	uc001paj.2	1740	DLG2	hg19_genes_introns	994888
AR_ctr	CD4 mem	chr11	83992060	83992060	1	5	51	Open Sea	NA	NA	NA	NA	0.947392	0.896346	0.0510461	0.079048	1.04e-06	1	0.892857	0.042386	0.966667	0.666667	0.0706121	0	0.00246756	2065450	0	0	21.5714	21.1111	11	3	36	34	7	17	chr11	83962335	84245612	283278	-	intron:365738	uc010rsz.1	1740	DLG2	hg19_genes_introns	994888
AR_ctr	CD4 mem	chr11	83992060	83992060	1	5	51	Open Sea	NA	NA	NA	NA	0.947392	0.896346	0.0510461	0.079048	1.04e-06	1	0.892857	0.042386	0.966667	0.666667	0.0706121	0	0.00246756	2065450	0	0	21.5714	21.1111	11	3	36	34	7	17	chr11	83962335	84245612	283278	-	intron:365760	uc010rta.1	1740	DLG2	hg19_genes_introns	994888
AR_ctr	CD4 mem	chr11	83992060	83992060	1	5	51	Open Sea	NA	NA	NA	NA	0.947392	0.896346	0.0510461	0.079048	1.04e-06	1	0.892857	0.042386	0.966667	0.666667	0.0706121	0	0.00246756	2065450	0	0	21.5714	21.1111	11	3	36	34	7	17	chr11	83962335	84245612	283278	-	intron:365782	uc001pak.2	1740	DLG2	hg19_genes_introns	994888
AR_ctr	CD4 mem	chr11	83992060	83992060	1	5	51	Open Sea	NA	NA	NA	NA	0.947392	0.896346	0.0510461	0.079048	1.04e-06	1	0.892857	0.042386	0.966667	0.666667	0.0706121	0	0.00246756	2065450	0	0	21.5714	21.1111	11	3	36	34	7	17	chr11	83962335	84245612	283278	-	intron:365820	uc001pal.1	1740	DLG2	hg19_genes_introns	994888
AR_ctr	CD4 mem	chr11	83992060	83992060	1	5	51	Open Sea	NA	NA	NA	NA	0.947392	0.896346	0.0510461	0.079048	1.04e-06	1	0.892857	0.042386	0.966667	0.666667	0.0706121	0	0.00246756	2065450	0	0	21.5714	21.1111	11	3	36	34	7	17	chr11	83962335	84027867	65533	-	intron:365832	uc001pam.2	1740	DLG2	hg19_genes_introns	994888
AR_ctr	CD4 mem	chr11	83992060	83992060	1	5	51	Open Sea	NA	NA	NA	NA	0.947392	0.896346	0.0510461	0.079048	1.04e-06	1	0.892857	0.042386	0.966667	0.666667	0.0706121	0	0.00246756	2065450	0	0	21.5714	21.1111	11	3	36	34	7	17	chr11	83001537	85335343	2333807	*	inter:11101	NA	NA	NA	hg19_cpg_inter	994888
AR_ctr	CD4 mem	chr17	70112424	70112424	1	3	48	Shelf	NA	NA	NA	NA	0.028047	0.0643505	-0.0363035	-0.966558	1.05e-06	0.078125	0	0.0295399	0.136364	0.0194175	0.0303541	0	0.00248024	1794702	0	0	67.1429	87.6111	30	40	103	137	7	18	chr17	70112158	70113157	1000	-	promoter:64201	uc002jiu.1	NA	NA	hg19_genes_promoters	4735
AR_ctr	CD4 mem	chr17	70112424	70112424	1	3	48	Shelf	NA	NA	NA	NA	0.028047	0.0643505	-0.0363035	-0.966558	1.05e-06	0.078125	0	0.0295399	0.136364	0.0194175	0.0303541	0	0.00248024	1794702	0	0	67.1429	87.6111	30	40	103	137	7	18	chr17	70112161	70116160	4000	+	1to5kb:61880	uc002jiw.3	6662	SOX9	hg19_genes_1to5kb	4735
AR_ctr	CD4 mem	chr17	70112424	70112424	1	3	48	Shelf	NA	NA	NA	NA	0.028047	0.0643505	-0.0363035	-0.966558	1.05e-06	0.078125	0	0.0295399	0.136364	0.0194175	0.0303541	0	0.00248024	1794702	0	0	67.1429	87.6111	30	40	103	137	7	18	chr17	70080170	70116903	36734	-	intron:522823	uc002jiv.3	NA	NA	hg19_genes_introns	4735
AR_ctr	CD4 mem	chr17	70112424	70112424	1	3	48	Shelf	NA	NA	NA	NA	0.028047	0.0643505	-0.0363035	-0.966558	1.05e-06	0.078125	0	0.0295399	0.136364	0.0194175	0.0303541	0	0.00248024	1794702	0	0	67.1429	87.6111	30	40	103	137	7	18	chr17	70112309	70112824	516	*	shore:38774	NA	NA	NA	hg19_cpg_shores	4735
AR_ctr	CD4 mem	chr1	11334945	11334945	1	2	51	Open Sea	NA	NA	NA	NA	0.874667	0.773387	0.101279	0.175408	1.07e-06	1	0.652174	0.121207	0.965517	0.5	0.151958	0	0.00252619	1364140	0	0	17	20.1667	4	6	30	29	6	16	chr1	11334118	11345700	11583	+	intron:2728	uc001asg.3	29914	UBIAD1	hg19_genes_introns	1689
AR_ctr	CD4 mem	chr1	11334945	11334945	1	2	51	Open Sea	NA	NA	NA	NA	0.874667	0.773387	0.101279	0.175408	1.07e-06	1	0.652174	0.121207	0.965517	0.5	0.151958	0	0.00252619	1364140	0	0	17	20.1667	4	6	30	29	6	16	chr1	11333548	11335547	2000	*	shore:733	NA	NA	NA	hg19_cpg_shores	1689
AR_ctr	CD4 mem	chr20	46750063	46750063	1	2	57	Open Sea	NA	NA	NA	NA	0.587836	0.544991	0.0428443	0.107284	1.07e-06	1	0.166667	0.326302	0.8	0	0.185326	0	0.00254186	1794292	0	0	16.2857	19.5	5	5	31	42	6	16	chr20	46589680	46983653	393974	*	intergenic:14909	NA	NA	NA	hg19_genes_intergenic	165019
AR_ctr	CD4 mem	chr20	46750063	46750063	1	2	57	Open Sea	NA	NA	NA	NA	0.587836	0.544991	0.0428443	0.107284	1.07e-06	1	0.166667	0.326302	0.8	0	0.185326	0	0.00254186	1794292	0	0	16.2857	19.5	5	5	31	42	6	16	chr20	46584168	46997708	413541	*	inter:18080	NA	NA	NA	hg19_cpg_inter	165019
AR_ctr	CD4 mem	chr14	60883575	60883575	1	5	46	Open Sea	NA	NA	NA	NA	0.928581	0.889505	0.0390765	0.0613508	1.08e-06	1	0.826087	0.0694831	0.972973	0.666667	0.0807284	0	0.0025593	2278587	0	0	27	27.2778	20	9	37	49	7	17	chr14	60793620	60902673	109054	*	intergenic:11207	NA	NA	NA	hg19_genes_intergenic	89974
AR_ctr	CD4 mem	chr14	60883575	60883575	1	5	46	Open Sea	NA	NA	NA	NA	0.928581	0.889505	0.0390765	0.0613508	1.08e-06	1	0.826087	0.0694831	0.972973	0.666667	0.0807284	0	0.0025593	2278587	0	0	27	27.2778	20	9	37	49	7	17	chr14	60868678	60947976	79299	*	inter:12933	NA	NA	NA	hg19_cpg_inter	89974
AR_ctr	CD4 mem	chr6	37432774	37432774	1	5	46	Open Sea	NA	NA	NA	NA	0.697752	0.555064	0.142688	0.32483	1.11e-06	0.888889	0.571429	0.1251	0.710526	0.142857	0.145286	0	0.00262782	915462	0	0	24.5714	25.7222	9	7	42	64	6	16	chr6	37430785	37438796	8012	+	intron:206639	uc003ons.3	23070	CMTR1	hg19_genes_introns	31866
AR_ctr	CD4 mem	chr6	37432774	37432774	1	5	46	Open Sea	NA	NA	NA	NA	0.697752	0.555064	0.142688	0.32483	1.11e-06	0.888889	0.571429	0.1251	0.710526	0.142857	0.145286	0	0.00262782	915462	0	0	24.5714	25.7222	9	7	42	64	6	16	chr6	37405368	37463395	58028	*	inter:6135	NA	NA	NA	hg19_cpg_inter	31866
AR_ctr	CD4 mem	chr19	4373557	4373557	1	5	66	Open Sea	NA	NA	NA	NA	0.892643	0.831522	0.0611205	0.101154	1.15e-06	1	0.723404	0.11214	0.96	0.666667	0.0875629	0	0.00270532	1847063	0	0	34	42.6667	5	22	47	69	6	18	chr19	4366992	4400320	33329	-	intron:553310	uc002maj.3	6455	SH3GL1	hg19_genes_introns	29101
AR_ctr	CD4 mem	chr19	4373557	4373557	1	5	66	Open Sea	NA	NA	NA	NA	0.892643	0.831522	0.0611205	0.101154	1.15e-06	1	0.723404	0.11214	0.96	0.666667	0.0875629	0	0.00270532	1847063	0	0	34	42.6667	5	22	47	69	6	18	chr19	4366992	4400320	33329	-	intron:553319	uc002mak.3	6455	SH3GL1	hg19_genes_introns	29101
AR_ctr	CD4 mem	chr19	4373557	4373557	1	5	66	Open Sea	NA	NA	NA	NA	0.892643	0.831522	0.0611205	0.101154	1.15e-06	1	0.723404	0.11214	0.96	0.666667	0.0875629	0	0.00270532	1847063	0	0	34	42.6667	5	22	47	69	6	18	chr19	4366992	4400320	33329	-	intron:553327	uc010xig.2	6455	SH3GL1	hg19_genes_introns	29101
AR_ctr	CD4 mem	chr19	4373557	4373557	1	5	66	Open Sea	NA	NA	NA	NA	0.892643	0.831522	0.0611205	0.101154	1.15e-06	1	0.723404	0.11214	0.96	0.666667	0.0875629	0	0.00270532	1847063	0	0	34	42.6667	5	22	47	69	6	18	chr19	4371953	4373952	2000	*	shore:41315	NA	NA	NA	hg19_cpg_shores	29101
AR_ctr	CD4 mem	chr8	122680065	122680065	1	8	73	Open Sea	NA	NA	NA	NA	0.923584	0.778775	0.144809	0.243166	1.16e-06	1	0.823529	0.0660776	0.961538	0.583333	0.126079	0	0.00273044	1111987	0	0	22.1429	20.8889	4	9	36	32	6	17	chr8	122658631	122966844	308214	*	intergenic:7384	NA	NA	NA	hg19_genes_intergenic	28478
AR_ctr	CD4 mem	chr8	122680065	122680065	1	8	73	Open Sea	NA	NA	NA	NA	0.923584	0.778775	0.144809	0.243166	1.16e-06	1	0.823529	0.0660776	0.961538	0.583333	0.126079	0	0.00273044	1111987	0	0	22.1429	20.8889	4	9	36	32	6	17	chr8	122656390	123788369	1131980	*	inter:8425	NA	NA	NA	hg19_cpg_inter	28478
AR_ctr	CD4 mem	chr19	13306147	13306147	1	3	49	Open Sea	NA	NA	NA	NA	0.713554	0.788783	-0.075229	-0.142703	1.18e-06	1	0.48	0.224084	0.935484	0.466667	0.120782	0	0.00276812	1541221	0	1	18.5714	20.2778	8	0	28	36	6	16	chr19	13266189	13317255	51067	*	intergenic:13905	NA	NA	NA	hg19_genes_intergenic	42145
AR_ctr	CD4 mem	chr19	13306147	13306147	1	3	49	Open Sea	NA	NA	NA	NA	0.713554	0.788783	-0.075229	-0.142703	1.18e-06	1	0.48	0.224084	0.935484	0.466667	0.120782	0	0.00276812	1541221	0	1	18.5714	20.2778	8	0	28	36	6	16	chr19	13278117	13314046	35930	*	inter:16801	NA	NA	NA	hg19_cpg_inter	42145
AR_ctr	CD4 mem	chr10	18239699	18239699	1	4	60	Open Sea	NA	NA	NA	NA	0.982143	0.853962	0.128181	0.19958	1.19e-06	1	0.875	0.0472456	1	0.333333	0.154113	0	0.00279316	1261155	0	0	14.4286	24.1667	5	3	19	50	6	17	chr10	18235768	18239767	4000	+	1to5kb:37737	uc001ipn.2	221074	SLC39A12	hg19_genes_1to5kb	1067
AR_ctr	CD4 mem	chr10	18239699	18239699	1	4	60	Open Sea	NA	NA	NA	NA	0.982143	0.853962	0.128181	0.19958	1.19e-06	1	0.875	0.0472456	1	0.333333	0.154113	0	0.00279316	1261155	0	0	14.4286	24.1667	5	3	19	50	6	17	chr10	18235768	18239767	4000	+	1to5kb:37738	uc001ipo.2	221074	SLC39A12	hg19_genes_1to5kb	1067
AR_ctr	CD4 mem	chr10	18239699	18239699	1	4	60	Open Sea	NA	NA	NA	NA	0.982143	0.853962	0.128181	0.19958	1.19e-06	1	0.875	0.0472456	1	0.333333	0.154113	0	0.00279316	1261155	0	0	14.4286	24.1667	5	3	19	50	6	17	chr10	18235768	18239767	4000	+	1to5kb:37739	uc001ipp.2	221074	SLC39A12	hg19_genes_1to5kb	1067
AR_ctr	CD4 mem	chr10	18239699	18239699	1	4	60	Open Sea	NA	NA	NA	NA	0.982143	0.853962	0.128181	0.19958	1.19e-06	1	0.875	0.0472456	1	0.333333	0.154113	0	0.00279316	1261155	0	0	14.4286	24.1667	5	3	19	50	6	17	chr10	18235768	18239767	4000	+	1to5kb:37740	uc010qck.1	221074	SLC39A12	hg19_genes_1to5kb	1067
AR_ctr	CD4 mem	chr10	18239699	18239699	1	4	60	Open Sea	NA	NA	NA	NA	0.982143	0.853962	0.128181	0.19958	1.19e-06	1	0.875	0.0472456	1	0.333333	0.154113	0	0.00279316	1261155	0	0	14.4286	24.1667	5	3	19	50	6	17	chr10	17690336	18425125	734790	*	inter:9632	NA	NA	NA	hg19_cpg_inter	1067
AR_ctr	CD4 mem	chr17	20800110	20800110	1	8	63	Island	NA	NA	NA	NA	0.877188	0.867795	0.00939253	0.015355	1.28e-06	1	0.6875	0.112633	1	0.636364	0.108291	0	0.00299451	3097191	0	0	13.4286	18.3333	5	9	23	32	6	17	chr17	20799454	20800453	1000	-	promoter:62949	uc002gyf.3	339184	CCDC144NL	hg19_genes_promoters	28363
AR_ctr	CD4 mem	chr17	20800110	20800110	1	8	63	Island	NA	NA	NA	NA	0.877188	0.867795	0.00939253	0.015355	1.28e-06	1	0.6875	0.112633	1	0.636364	0.108291	0	0.00299451	3097191	0	0	13.4286	18.3333	5	9	23	32	6	17	chr17	20795746	20805530	9785	+	intron:494092	uc002gyg.1	NA	NA	hg19_genes_introns	28363
AR_ctr	CD4 mem	chr17	20800110	20800110	1	8	63	Island	NA	NA	NA	NA	0.877188	0.867795	0.00939253	0.015355	1.28e-06	1	0.6875	0.112633	1	0.636364	0.108291	0	0.00299451	3097191	0	0	13.4286	18.3333	5	9	23	32	6	17	chr17	20795746	20805530	9785	+	intron:494094	uc002gyh.1	NA	NA	hg19_genes_introns	28363
AR_ctr	CD4 mem	chr17	20800110	20800110	1	8	63	Island	NA	NA	NA	NA	0.877188	0.867795	0.00939253	0.015355	1.28e-06	1	0.6875	0.112633	1	0.636364	0.108291	0	0.00299451	3097191	0	0	13.4286	18.3333	5	9	23	32	6	17	chr17	20798958	20800112	1155	*	island:20510	NA	NA	NA	hg19_cpg_islands	28363
AR_ctr	CD4 mem	chr3	196255266	196255266	1	6	60	Open Sea	NA	NA	NA	NA	0.872135	0.763579	0.108556	0.18945	1.29e-06	1	0.714286	0.116848	0.9	0.5	0.0996551	0	0.00300206	1303828	0	0	15.8571	13.2778	3	3	35	24	6	14	chr3	196247238	196281058	33821	*	intergenic:3631	NA	NA	NA	hg19_genes_intergenic	40457
AR_ctr	CD4 mem	chr3	196255266	196255266	1	6	60	Open Sea	NA	NA	NA	NA	0.872135	0.763579	0.108556	0.18945	1.29e-06	1	0.714286	0.116848	0.9	0.5	0.0996551	0	0.00300206	1303828	0	0	15.8571	13.2778	3	3	35	24	6	14	chr3	196253496	196255495	2000	*	shore:9779	NA	NA	NA	hg19_cpg_shores	40457
AR_ctr	CD4 mem	chr8	55157377	55157377	1	3	52	Open Sea	NA	NA	NA	NA	0.786222	0.659237	0.126985	0.250653	1.38e-06	1	0.5	0.176374	0.928571	0.263158	0.188392	0	0.00321222	1090683	0	0	17.7143	24.4444	6	9	23	60	6	17	chr8	55061075	55365494	304420	*	intergenic:7135	NA	NA	NA	hg19_genes_intergenic	109595
AR_ctr	CD4 mem	chr8	55157377	55157377	1	3	52	Open Sea	NA	NA	NA	NA	0.786222	0.659237	0.126985	0.250653	1.38e-06	1	0.5	0.176374	0.928571	0.263158	0.188392	0	0.00321222	1090683	0	0	17.7143	24.4444	6	9	23	60	6	17	chr8	55052006	55362180	310175	*	inter:8180	NA	NA	NA	hg19_cpg_inter	109595
AR_ctr	CD4 mem	chr5	45346796	45346796	1	3	53	Open Sea	NA	NA	NA	NA	0.934701	0.880158	0.0545424	0.0857955	1.44e-06	1	0.75	0.0872951	0.978723	0.785714	0.0497999	0	0.00333387	1993420	0	0	40.4286	54.5556	20	22	67	85	7	18	chr5	45303942	45353201	49260	-	intron:191750	uc003jok.3	348980	HCN1	hg19_genes_introns	536850
AR_ctr	CD4 mem	chr5	45346796	45346796	1	3	53	Open Sea	NA	NA	NA	NA	0.934701	0.880158	0.0545424	0.0857955	1.44e-06	1	0.75	0.0872951	0.978723	0.785714	0.0497999	0	0.00333387	1993420	0	0	40.4286	54.5556	20	22	67	85	7	18	chr5	44813693	45691394	877702	*	inter:5112	NA	NA	NA	hg19_cpg_inter	536850
AR_ctr	CD4 mem	chr2	11316901	11316901	1	11	65	Open Sea	NA	NA	NA	NA	0.885089	0.750656	0.134432	0.234786	1.46e-06	1	0.6	0.13748	0.928571	0.5	0.127384	0	0.00337344	1137519	0	0	13.8571	12.1667	8	4	18	25	6	13	chr2	11315136	11317862	2727	+	intron:65617	uc002rbc.3	130814	PQLC3	hg19_genes_introns	21360
AR_ctr	CD4 mem	chr2	11316901	11316901	1	11	65	Open Sea	NA	NA	NA	NA	0.885089	0.750656	0.134432	0.234786	1.46e-06	1	0.6	0.13748	0.928571	0.5	0.127384	0	0.00337344	1137519	0	0	13.8571	12.1667	8	4	18	25	6	13	chr2	11312172	11317862	5691	+	intron:65622	uc010yjk.2	130814	PQLC3	hg19_genes_introns	21360
AR_ctr	CD4 mem	chr2	11316901	11316901	1	11	65	Open Sea	NA	NA	NA	NA	0.885089	0.750656	0.134432	0.234786	1.46e-06	1	0.6	0.13748	0.928571	0.5	0.127384	0	0.00337344	1137519	0	0	13.8571	12.1667	8	4	18	25	6	13	chr2	11300007	11479959	179953	*	inter:1972	NA	NA	NA	hg19_cpg_inter	21360
AR_ctr	CD4 mem	chr7	105481198	105481198	1	3	44	Open Sea	NA	NA	NA	NA	0.969294	0.971075	-0.00178101	-0.00262141	1.46e-06	1	0.92	0.0321497	1	0.9375	0.0192511	0	0.00338723	3376545	0	0	57.7143	65.4444	12	25	78	108	7	18	chr7	105429155	105516257	87103	-	intron:257294	uc003vde.2	222255	ATXN7L1	hg19_genes_introns	36067
AR_ctr	CD4 mem	chr7	105481198	105481198	1	3	44	Open Sea	NA	NA	NA	NA	0.969294	0.971075	-0.00178101	-0.00262141	1.46e-06	1	0.92	0.0321497	1	0.9375	0.0192511	0	0.00338723	3376545	0	0	57.7143	65.4444	12	25	78	108	7	18	chr7	105429155	105516257	87103	-	intron:257312	uc003vdi.2	222255	ATXN7L1	hg19_genes_introns	36067
AR_ctr	CD4 mem	chr7	105481198	105481198	1	3	44	Open Sea	NA	NA	NA	NA	0.969294	0.971075	-0.00178101	-0.00262141	1.46e-06	1	0.92	0.0321497	1	0.9375	0.0192511	0	0.00338723	3376545	0	0	57.7143	65.4444	12	25	78	108	7	18	chr7	105227851	105512844	284994	*	inter:7499	NA	NA	NA	hg19_cpg_inter	36067
AR_ctr	CD4 mem	chr7	2483686	2483686	1	10	65	Open Sea	NA	NA	NA	NA	0.88472	0.714194	0.170526	0.305061	1.52e-06	1	0.666667	0.114075	0.916667	0.5	0.116883	0	0.00350598	955852	0	0	10.7143	12	6	3	14	25	5	11	chr7	2477556	2485576	8021	+	intron:232350	uc003sme.3	NA	NA	hg19_genes_introns	6287
AR_ctr	CD4 mem	chr7	2483686	2483686	1	10	65	Open Sea	NA	NA	NA	NA	0.88472	0.714194	0.170526	0.305061	1.52e-06	1	0.666667	0.114075	0.916667	0.5	0.116883	0	0.00350598	955852	0	0	10.7143	12	6	3	14	25	5	11	chr7	2477568	2495905	18338	*	inter:6846	NA	NA	NA	hg19_cpg_inter	6287
AR_ctr	CD4 mem	chr12	54682543	54682543	1	6	58	Open Sea	NA	NA	NA	NA	0.749189	0.483307	0.265882	0.621975	1.58e-06	1	0.6	0.172845	0.823529	0.125	0.220981	0	0.00363002	570012	0	0	15.8571	12.7222	4	4	35	25	5	13	chr12	54680873	54685890	5018	*	intergenic:10186	NA	NA	NA	hg19_genes_intergenic	6963
AR_ctr	CD4 mem	chr12	54682543	54682543	1	6	58	Open Sea	NA	NA	NA	NA	0.749189	0.483307	0.265882	0.621975	1.58e-06	1	0.6	0.172845	0.823529	0.125	0.220981	0	0.00363002	570012	0	0	15.8571	12.7222	4	4	35	25	5	13	chr12	54678989	54759057	80069	*	inter:11748	NA	NA	NA	hg19_cpg_inter	6963
AR_ctr	CD4 mem	chr2	112082015	112082015	1	5	64	Open Sea	NA	NA	NA	NA	0.803819	0.68594	0.117879	0.225744	1.6e-06	1	0.473684	0.180379	0.969697	0.0833333	0.282705	0	0.00367431	1166654	0	0	25	27.5	6	9	39	43	6	17	chr2	112079669	112083668	4000	-	1to5kb:11787	uc021vmu.1	100616499	MIR4435-1	hg19_genes_1to5kb	167090
AR_ctr	CD4 mem	chr2	112082015	112082015	1	5	64	Open Sea	NA	NA	NA	NA	0.803819	0.68594	0.117879	0.225744	1.6e-06	1	0.473684	0.180379	0.969697	0.0833333	0.282705	0	0.00367431	1166654	0	0	25	27.5	6	9	39	43	6	17	chr2	112005819	112101637	95819	-	intron:98399	uc002the.2	541471	MIR4435-2HG	hg19_genes_introns	167090
AR_ctr	CD4 mem	chr2	112082015	112082015	1	5	64	Open Sea	NA	NA	NA	NA	0.803819	0.68594	0.117879	0.225744	1.6e-06	1	0.473684	0.180379	0.969697	0.0833333	0.282705	0	0.00367431	1166654	0	0	25	27.5	6	9	39	43	6	17	chr2	111986336	112637337	651002	*	inter:2513	NA	NA	NA	hg19_cpg_inter	167090
AR_ctr	CD4 mem	chr21	43166762	43166762	1	4	65	Open Sea	NA	NA	NA	NA	0.8934	0.764909	0.12849	0.221337	1.64e-06	1	0.758621	0.0912248	0.95	0.571429	0.121272	0	0.00376181	1180804	0	0	17.5714	17	1	6	32	30	5	17	chr21	43166023	43166772	750	-	intron:589315	uc002yzn.1	54101	RIPK4	hg19_genes_introns	30165
AR_ctr	CD4 mem	chr21	43166762	43166762	1	4	65	Open Sea	NA	NA	NA	NA	0.8934	0.764909	0.12849	0.221337	1.64e-06	1	0.758621	0.0912248	0.95	0.571429	0.121272	0	0.00376181	1180804	0	0	17.5714	17	1	6	32	30	5	17	chr21	43166732	43167131	400	-	intronexonboundary:617246	uc002yzn.1	54101	RIPK4	hg19_genes_intronexonboundaries	30165
AR_ctr	CD4 mem	chr21	43166762	43166762	1	4	65	Open Sea	NA	NA	NA	NA	0.8934	0.764909	0.12849	0.221337	1.64e-06	1	0.758621	0.0912248	0.95	0.571429	0.121272	0	0.00376181	1180804	0	0	17.5714	17	1	6	32	30	5	17	chr21	43166574	43166973	400	-	exonintronboundary:621000	uc002yzn.1	54101	RIPK4	hg19_genes_exonintronboundaries	30165
AR_ctr	CD4 mem	chr21	43166762	43166762	1	4	65	Open Sea	NA	NA	NA	NA	0.8934	0.764909	0.12849	0.221337	1.64e-06	1	0.758621	0.0912248	0.95	0.571429	0.121272	0	0.00376181	1180804	0	0	17.5714	17	1	6	32	30	5	17	chr21	43165949	43172662	6714	*	inter:18404	NA	NA	NA	hg19_cpg_inter	30165
AR_ctr	CD4 mem	chr22	41812266	41812266	1	5	61	Open Sea	NA	NA	NA	NA	0.938899	0.864835	0.0740641	0.117244	1.66e-06	1	0.888889	0.045825	0.981132	0.5	0.108036	0	0.00381249	1714990	0	0	32.1429	39.3333	5	2	46	58	6	17	chr22	41795333	41829491	34159	*	intergenic:15474	NA	NA	NA	hg19_genes_intergenic	34332
AR_ctr	CD4 mem	chr22	41812266	41812266	1	5	61	Open Sea	NA	NA	NA	NA	0.938899	0.864835	0.0740641	0.117244	1.66e-06	1	0.888889	0.045825	0.981132	0.5	0.108036	0	0.00381249	1714990	0	0	32.1429	39.3333	5	2	46	58	6	17	chr22	41812264	41814263	2000	*	shelf:40223	NA	NA	NA	hg19_cpg_shelves	34332
AR_ctr	CD4 mem	chr1	64966258	64966258	1	4	44	Open Sea	NA	NA	NA	NA	0.946857	0.870047	0.0768095	0.120722	1.7e-06	1	0.88172	0.0449137	0.972603	0.666667	0.0825904	0	0.00389075	1690587	0	1	45.2857	38.1111	15	0	93	78	7	16	chr1	64936626	65016276	79651	+	intron:12370	uc001dbo.1	57685	CACHD1	hg19_genes_introns	5337
AR_ctr	CD4 mem	chr1	64966258	64966258	1	4	44	Open Sea	NA	NA	NA	NA	0.946857	0.870047	0.0768095	0.120722	1.7e-06	1	0.88172	0.0449137	0.972603	0.666667	0.0825904	0	0.00389075	1690587	0	1	45.2857	38.1111	15	0	93	78	7	16	chr1	64940615	64967358	26744	*	inter:847	NA	NA	NA	hg19_cpg_inter	5337
AR_ctr	CD4 mem	chr17	38478133	38478133	1	2	53	Open Sea	NA	NA	NA	NA	0.772536	0.596656	0.175879	0.367277	1.85e-06	1	0.421053	0.211498	0.92	0.0909091	0.204013	0	0.00421494	841687	0	1	17.4286	19.4444	4	0	24	30	6	16	chr17	38477237	38480096	2860	*	enhancer:24701	NA	NA	NA	hg19_enhancers_fantom	3659
AR_ctr	CD4 mem	chr17	38478133	38478133	1	2	53	Open Sea	NA	NA	NA	NA	0.772536	0.596656	0.175879	0.367277	1.85e-06	1	0.421053	0.211498	0.92	0.0909091	0.204013	0	0.00421494	841687	0	1	17.4286	19.4444	4	0	24	30	6	16	chr17	38465539	38487108	21570	+	intron:497139	uc002huk.2	5914	RARA	hg19_genes_introns	3659
AR_ctr	CD4 mem	chr17	38478133	38478133	1	2	53	Open Sea	NA	NA	NA	NA	0.772536	0.596656	0.175879	0.367277	1.85e-06	1	0.421053	0.211498	0.92	0.0909091	0.204013	0	0.00421494	841687	0	1	17.4286	19.4444	4	0	24	30	6	16	chr17	38474701	38487108	12408	+	intron:497147	uc002hul.4	5914	RARA	hg19_genes_introns	3659
AR_ctr	CD4 mem	chr17	38478133	38478133	1	2	53	Open Sea	NA	NA	NA	NA	0.772536	0.596656	0.175879	0.367277	1.85e-06	1	0.421053	0.211498	0.92	0.0909091	0.204013	0	0.00421494	841687	0	1	17.4286	19.4444	4	0	24	30	6	16	chr17	38474701	38487108	12408	+	intron:497155	uc010wfe.2	5914	RARA	hg19_genes_introns	3659
AR_ctr	CD4 mem	chr17	38478133	38478133	1	2	53	Open Sea	NA	NA	NA	NA	0.772536	0.596656	0.175879	0.367277	1.85e-06	1	0.421053	0.211498	0.92	0.0909091	0.204013	0	0.00421494	841687	0	1	17.4286	19.4444	4	0	24	30	6	16	chr17	38476981	38478980	2000	*	shelf:32486	NA	NA	NA	hg19_cpg_shelves	3659
AR_ctr	CD4 mem	chr2	109813177	109813177	1	2	65	Open Sea	NA	NA	NA	NA	0.855959	0.824556	0.0314032	0.0532903	1.89e-06	1	0.632653	0.126782	0.954545	0.657143	0.0961278	0	0.0042928	2394208	0	0	27.4286	35.8333	1	4	49	62	6	17	chr2	109746570	109964129	217560	+	intron:74967	uc010ywt.1	344558	SH3RF3	hg19_genes_introns	67179
AR_ctr	CD4 mem	chr2	109813177	109813177	1	2	65	Open Sea	NA	NA	NA	NA	0.855959	0.824556	0.0314032	0.0532903	1.89e-06	1	0.632653	0.126782	0.954545	0.657143	0.0961278	0	0.0042928	2394208	0	0	27.4286	35.8333	1	4	49	62	6	17	chr2	109750834	110366906	616073	*	inter:2495	NA	NA	NA	hg19_cpg_inter	67179
AR_ctr	CD4 mem	chr2	127659700	127659700	1	2	51	Open Sea	NA	NA	NA	NA	0.746037	0.59508	0.150957	0.32133	1.89e-06	1	0.285714	0.252601	0.944444	0.25	0.213308	0	0.00430123	921498	0	1	16.1429	25.6667	2	0	26	54	5	16	chr2	127454252	127805598	351347	*	intergenic:2245	NA	NA	NA	hg19_genes_intergenic	246188
AR_ctr	CD4 mem	chr2	127659700	127659700	1	2	51	Open Sea	NA	NA	NA	NA	0.746037	0.59508	0.150957	0.32133	1.89e-06	1	0.285714	0.252601	0.944444	0.25	0.213308	0	0.00430123	921498	0	1	16.1429	25.6667	2	0	26	54	5	16	chr2	127648105	127725672	77568	*	inter:2586	NA	NA	NA	hg19_cpg_inter	246188
AR_ctr	CD4 mem	chr14	95725557	95725557	1	3	61	Open Sea	NA	NA	NA	NA	0.821712	0.746011	0.0757001	0.137675	1.9e-06	1	0.315789	0.249882	0.9375	0.5	0.128073	0	0.00431231	1570737	0	0	21.4286	21.1111	3	8	38	42	5	17	chr14	95696471	95786047	89577	-	intron:435421	uc001yef.2	79789	CLMN	hg19_genes_introns	81736
AR_ctr	CD4 mem	chr14	95725557	95725557	1	3	61	Open Sea	NA	NA	NA	NA	0.821712	0.746011	0.0757001	0.137675	1.9e-06	1	0.315789	0.249882	0.9375	0.5	0.128073	0	0.00431231	1570737	0	0	21.4286	21.1111	3	8	38	42	5	17	chr14	95628221	95781752	153532	*	inter:13153	NA	NA	NA	hg19_cpg_inter	81736
AR_ctr	CD4 mem	chr17	34079823	34079823	1	4	65	Open Sea	NA	NA	NA	NA	0.335254	0.430204	-0.0949497	-0.350513	1.96e-06	0.619048	0	0.24145	0.8125	0.111111	0.200568	0	0.00444877	869400	0	0	16.1429	23.3333	4	3	25	64	5	16	chr17	34079485	34079869	385	-	CDS:459979	uc002hjv.2	246176	GAS2L2	hg19_genes_cds	8091
AR_ctr	CD4 mem	chr17	34079823	34079823	1	4	65	Open Sea	NA	NA	NA	NA	0.335254	0.430204	-0.0949497	-0.350513	1.96e-06	0.619048	0	0.24145	0.8125	0.111111	0.200568	0	0.00444877	869400	0	0	16.1429	23.3333	4	3	25	64	5	16	chr17	34079485	34079897	413	-	exon:577572	uc002hjv.2	246176	GAS2L2	hg19_genes_exons	8091
AR_ctr	CD4 mem	chr17	34079823	34079823	1	4	65	Open Sea	NA	NA	NA	NA	0.335254	0.430204	-0.0949497	-0.350513	1.96e-06	0.619048	0	0.24145	0.8125	0.111111	0.200568	0	0.00444877	869400	0	0	16.1429	23.3333	4	3	25	64	5	16	chr17	34079485	34079897	413	-	firstexon:63170	uc002hjv.2	246176	GAS2L2	hg19_genes_firstexons	8091
AR_ctr	CD4 mem	chr17	34079823	34079823	1	4	65	Open Sea	NA	NA	NA	NA	0.335254	0.430204	-0.0949497	-0.350513	1.96e-06	0.619048	0	0.24145	0.8125	0.111111	0.200568	0	0.00444877	869400	0	0	16.1429	23.3333	4	3	25	64	5	16	chr17	34079698	34080097	400	-	intronexonboundary:537355	uc002hjv.2	246176	GAS2L2	hg19_genes_intronexonboundaries	8091
AR_ctr	CD4 mem	chr17	34079823	34079823	1	4	65	Open Sea	NA	NA	NA	NA	0.335254	0.430204	-0.0949497	-0.350513	1.96e-06	0.619048	0	0.24145	0.8125	0.111111	0.200568	0	0.00444877	869400	0	0	16.1429	23.3333	4	3	25	64	5	16	chr17	34072669	34087136	14468	*	inter:15288	NA	NA	NA	hg19_cpg_inter	8091
AR_ctr	CD4 mem	chr11	76378715	76378715	1	4	46	Open Sea	NA	NA	NA	NA	0.929255	0.858273	0.070982	0.113368	1.99e-06	1	0.858974	0.0619921	0.972222	0.72973	0.0724883	0	0.00450255	1746007	0	0	41.5714	52.6111	16	23	78	95	7	18	chr11	76377003	76380805	3803	-	intron:365206	uc001oxq.4	2615	LRRC32	hg19_genes_introns	114640
AR_ctr	CD4 mem	chr11	76378715	76378715	1	4	46	Open Sea	NA	NA	NA	NA	0.929255	0.858273	0.070982	0.113368	1.99e-06	1	0.858974	0.0619921	0.972222	0.72973	0.0724883	0	0.00450255	1746007	0	0	41.5714	52.6111	16	23	78	95	7	18	chr11	76377003	76381657	4655	-	intron:365208	uc001oxr.4	2615	LRRC32	hg19_genes_introns	114640
AR_ctr	CD4 mem	chr11	76378715	76378715	1	4	46	Open Sea	NA	NA	NA	NA	0.929255	0.858273	0.070982	0.113368	1.99e-06	1	0.858974	0.0619921	0.972222	0.72973	0.0724883	0	0.00450255	1746007	0	0	41.5714	52.6111	16	23	78	95	7	18	chr11	76377003	76380805	3803	-	intron:365211	uc010rsf.2	2615	LRRC32	hg19_genes_introns	114640
AR_ctr	CD4 mem	chr11	76378715	76378715	1	4	46	Open Sea	NA	NA	NA	NA	0.929255	0.858273	0.070982	0.113368	1.99e-06	1	0.858974	0.0619921	0.972222	0.72973	0.0724883	0	0.00450255	1746007	0	0	41.5714	52.6111	16	23	78	95	7	18	chr11	76377450	76379449	2000	*	shelf:23297	NA	NA	NA	hg19_cpg_shelves	114640
AR_ctr	CD4 mem	chr9	135418361	135418361	1	3	59	Open Sea	NA	NA	NA	NA	0.867757	0.781287	0.0864696	0.14962	2.03e-06	1	0.526316	0.172673	0.923077	0.285714	0.146781	0	0.00459066	1501090	0	0	17.7143	15.4444	3	7	28	22	6	15	chr9	135418333	135418434	102	+	CDS:264098	uc004cbn.3	389799	CFAP77	hg19_genes_cds	39630
AR_ctr	CD4 mem	chr9	135418361	135418361	1	3	59	Open Sea	NA	NA	NA	NA	0.867757	0.781287	0.0864696	0.14962	2.03e-06	1	0.526316	0.172673	0.923077	0.285714	0.146781	0	0.00459066	1501090	0	0	17.7143	15.4444	3	7	28	22	6	15	chr9	135418333	135418434	102	+	CDS:264104	uc004cbo.3	389799	CFAP77	hg19_genes_cds	39630
AR_ctr	CD4 mem	chr9	135418361	135418361	1	3	59	Open Sea	NA	NA	NA	NA	0.867757	0.781287	0.0864696	0.14962	2.03e-06	1	0.526316	0.172673	0.923077	0.285714	0.146781	0	0.00459066	1501090	0	0	17.7143	15.4444	3	7	28	22	6	15	chr9	135418333	135418434	102	+	exon:328464	uc004cbn.3	389799	CFAP77	hg19_genes_exons	39630
AR_ctr	CD4 mem	chr9	135418361	135418361	1	3	59	Open Sea	NA	NA	NA	NA	0.867757	0.781287	0.0864696	0.14962	2.03e-06	1	0.526316	0.172673	0.923077	0.285714	0.146781	0	0.00459066	1501090	0	0	17.7143	15.4444	3	7	28	22	6	15	chr9	135418333	135418434	102	+	exon:328470	uc004cbo.3	389799	CFAP77	hg19_genes_exons	39630
AR_ctr	CD4 mem	chr9	135418361	135418361	1	3	59	Open Sea	NA	NA	NA	NA	0.867757	0.781287	0.0864696	0.14962	2.03e-06	1	0.526316	0.172673	0.923077	0.285714	0.146781	0	0.00459066	1501090	0	0	17.7143	15.4444	3	7	28	22	6	15	chr9	135418133	135418532	400	+	intronexonboundary:305349	uc004cbn.3	389799	CFAP77	hg19_genes_intronexonboundaries	39630
AR_ctr	CD4 mem	chr9	135418361	135418361	1	3	59	Open Sea	NA	NA	NA	NA	0.867757	0.781287	0.0864696	0.14962	2.03e-06	1	0.526316	0.172673	0.923077	0.285714	0.146781	0	0.00459066	1501090	0	0	17.7143	15.4444	3	7	28	22	6	15	chr9	135418133	135418532	400	+	intronexonboundary:305350	uc004cbo.3	389799	CFAP77	hg19_genes_intronexonboundaries	39630
AR_ctr	CD4 mem	chr9	135418361	135418361	1	3	59	Open Sea	NA	NA	NA	NA	0.867757	0.781287	0.0864696	0.14962	2.03e-06	1	0.526316	0.172673	0.923077	0.285714	0.146781	0	0.00459066	1501090	0	0	17.7143	15.4444	3	7	28	22	6	15	chr9	135418234	135418633	400	+	exonintronboundary:308836	uc004cbn.3	389799	CFAP77	hg19_genes_exonintronboundaries	39630
AR_ctr	CD4 mem	chr9	135418361	135418361	1	3	59	Open Sea	NA	NA	NA	NA	0.867757	0.781287	0.0864696	0.14962	2.03e-06	1	0.526316	0.172673	0.923077	0.285714	0.146781	0	0.00459066	1501090	0	0	17.7143	15.4444	3	7	28	22	6	15	chr9	135418234	135418633	400	+	exonintronboundary:308837	uc004cbo.3	389799	CFAP77	hg19_genes_exonintronboundaries	39630
AR_ctr	CD4 mem	chr9	135418361	135418361	1	3	59	Open Sea	NA	NA	NA	NA	0.867757	0.781287	0.0864696	0.14962	2.03e-06	1	0.526316	0.172673	0.923077	0.285714	0.146781	0	0.00459066	1501090	0	0	17.7143	15.4444	3	7	28	22	6	15	chr9	135366482	135451164	84683	*	inter:9354	NA	NA	NA	hg19_cpg_inter	39630
AR_ctr	CD4 mem	chr16	3069863	3069863	1	5	59	Shelf	NA	NA	NA	NA	0.873445	0.793364	0.0800808	0.137086	2.04e-06	1	0.727273	0.120702	0.933333	0.5	0.111718	0	0.00460805	1574204	0	0	14.4286	15.7222	5	3	22	43	5	17	chr16	3069313	3070312	1000	+	promoter:57160	uc002csv.4	51330	TNFRSF12A	hg19_genes_promoters	448
AR_ctr	CD4 mem	chr16	3069863	3069863	1	5	59	Shelf	NA	NA	NA	NA	0.873445	0.793364	0.0800808	0.137086	2.04e-06	1	0.727273	0.120702	0.933333	0.5	0.111718	0	0.00460805	1574204	0	0	14.4286	15.7222	5	3	22	43	5	17	chr16	3069313	3070312	1000	+	promoter:57161	uc002csw.4	51330	TNFRSF12A	hg19_genes_promoters	448
AR_ctr	CD4 mem	chr16	3069863	3069863	1	5	59	Shelf	NA	NA	NA	NA	0.873445	0.793364	0.0800808	0.137086	2.04e-06	1	0.727273	0.120702	0.933333	0.5	0.111718	0	0.00460805	1574204	0	0	14.4286	15.7222	5	3	22	43	5	17	chr16	3069391	3070390	1000	+	promoter:57162	uc031quu.1	51330	TNFRSF12A	hg19_genes_promoters	448
AR_ctr	CD4 mem	chr16	3069863	3069863	1	5	59	Shelf	NA	NA	NA	NA	0.873445	0.793364	0.0800808	0.137086	2.04e-06	1	0.727273	0.120702	0.933333	0.5	0.111718	0	0.00460805	1574204	0	0	14.4286	15.7222	5	3	22	43	5	17	chr16	3069032	3073031	4000	+	1to5kb:57163	uc002ctb.2	79228	THOC6	hg19_genes_1to5kb	448
AR_ctr	CD4 mem	chr16	3069863	3069863	1	5	59	Shelf	NA	NA	NA	NA	0.873445	0.793364	0.0800808	0.137086	2.04e-06	1	0.727273	0.120702	0.933333	0.5	0.111718	0	0.00460805	1574204	0	0	14.4286	15.7222	5	3	22	43	5	17	chr16	3069032	3073031	4000	+	1to5kb:57164	uc002ctd.2	79228	THOC6	hg19_genes_1to5kb	448
AR_ctr	CD4 mem	chr16	3069863	3069863	1	5	59	Shelf	NA	NA	NA	NA	0.873445	0.793364	0.0800808	0.137086	2.04e-06	1	0.727273	0.120702	0.933333	0.5	0.111718	0	0.00460805	1574204	0	0	14.4286	15.7222	5	3	22	43	5	17	chr16	3069042	3073041	4000	+	1to5kb:57165	uc002cta.2	79228	THOC6	hg19_genes_1to5kb	448
AR_ctr	CD4 mem	chr16	3069863	3069863	1	5	59	Shelf	NA	NA	NA	NA	0.873445	0.793364	0.0800808	0.137086	2.04e-06	1	0.727273	0.120702	0.933333	0.5	0.111718	0	0.00460805	1574204	0	0	14.4286	15.7222	5	3	22	43	5	17	chr16	3069189	3073188	4000	-	1to5kb:58880	uc002csu.4	9074	CLDN6	hg19_genes_1to5kb	448
AR_ctr	CD4 mem	chr16	3069863	3069863	1	5	59	Shelf	NA	NA	NA	NA	0.873445	0.793364	0.0800808	0.137086	2.04e-06	1	0.727273	0.120702	0.933333	0.5	0.111718	0	0.00460805	1574204	0	0	14.4286	15.7222	5	3	22	43	5	17	chr16	3067023	3071022	4000	-	1to5kb:58881	uc021tbb.1	NA	NA	hg19_genes_1to5kb	448
AR_ctr	CD4 mem	chr16	3069863	3069863	1	5	59	Shelf	NA	NA	NA	NA	0.873445	0.793364	0.0800808	0.137086	2.04e-06	1	0.727273	0.120702	0.933333	0.5	0.111718	0	0.00460805	1574204	0	0	14.4286	15.7222	5	3	22	43	5	17	chr16	3068359	3070095	1737	*	shore:34574	NA	NA	NA	hg19_cpg_shores	448
AR_ctr	CD4 mem	chr16	89656020	89656020	1	3	68	Open Sea	NA	NA	NA	NA	0.828361	0.793169	0.0351922	0.0618684	2.07e-06	1	0.578947	0.156558	0.923077	0.5	0.134552	0	0.00465872	2272126	0	0	12.1429	14.2778	5	7	22	32	5	13	chr16	89655217	89656304	1088	+	intron:477701	uc002fnp.3	27132	CPNE7	hg19_genes_introns	13843
AR_ctr	CD4 mem	chr16	89656020	89656020	1	3	68	Open Sea	NA	NA	NA	NA	0.828361	0.793169	0.0351922	0.0618684	2.07e-06	1	0.578947	0.156558	0.923077	0.5	0.134552	0	0.00465872	2272126	0	0	12.1429	14.2778	5	7	22	32	5	13	chr16	89655217	89656304	1088	+	intron:477715	uc002fnq.3	27132	CPNE7	hg19_genes_introns	13843
AR_ctr	CD4 mem	chr16	89656020	89656020	1	3	68	Open Sea	NA	NA	NA	NA	0.828361	0.793169	0.0351922	0.0618684	2.07e-06	1	0.578947	0.156558	0.923077	0.5	0.134552	0	0.00465872	2272126	0	0	12.1429	14.2778	5	7	22	32	5	13	chr16	89654693	89656692	2000	*	shore:36558	NA	NA	NA	hg19_cpg_shores	13843
AR_ctr	CD4 mem	chr16	222155	222155	1	4	64	Open Sea	NA	NA	NA	NA	0.153665	0.213752	-0.0600869	-0.451153	2.1e-06	0.45	0	0.163486	0.545455	0.0555556	0.118861	0	0.00471961	1233292	0	0	19.7143	25.8333	1	6	35	43	6	16	chr16	221846	222845	1000	+	promoter:56898	uc002cfv.4	3040	HBA2	hg19_genes_promoters	689
AR_ctr	CD4 mem	chr16	222155	222155	1	4	64	Open Sea	NA	NA	NA	NA	0.153665	0.213752	-0.0600869	-0.451153	2.1e-06	0.45	0	0.163486	0.545455	0.0555556	0.118861	0	0.00471961	1233292	0	0	19.7143	25.8333	1	6	35	43	6	16	chr16	221679	225678	4000	+	1to5kb:56899	uc002cfx.1	3039	HBA1	hg19_genes_1to5kb	689
AR_ctr	CD4 mem	chr16	222155	222155	1	4	64	Open Sea	NA	NA	NA	NA	0.153665	0.213752	-0.0600869	-0.451153	2.1e-06	0.45	0	0.163486	0.545455	0.0555556	0.118861	0	0.00471961	1233292	0	0	19.7143	25.8333	1	6	35	43	6	16	chr16	220370	222369	2000	*	shore:34054	NA	NA	NA	hg19_cpg_shores	689
AR_ctr	CD4 mem	chr17	75059508	75059508	1	5	54	Open Sea	NA	NA	NA	NA	0.915362	0.851247	0.0641151	0.103591	2.1e-06	1	0.84	0.068868	0.933333	0.615385	0.0753086	0	0.00471961	1826486	0	0	30.4286	33.7222	16	13	50	51	7	18	chr17	74946472	75077797	131326	*	intergenic:13315	NA	NA	NA	hg19_genes_intergenic	23288
AR_ctr	CD4 mem	chr17	75059508	75059508	1	5	54	Open Sea	NA	NA	NA	NA	0.915362	0.851247	0.0641151	0.103591	2.1e-06	1	0.84	0.068868	0.933333	0.615385	0.0753086	0	0.00471961	1826486	0	0	30.4286	33.7222	16	13	50	51	7	18	chr17	75056536	75080622	24087	*	inter:15825	NA	NA	NA	hg19_cpg_inter	23288
AR_ctr	CD4 mem	chr1	150167662	150167662	1	3	57	Open Sea	NA	NA	NA	NA	0.874088	0.778575	0.0955131	0.164942	2.13e-06	1	0.8	0.0944885	0.928571	0.571429	0.0983109	0	0.00477885	1416247	0	0	13.8571	16.6667	6	9	21	25	6	17	chr1	150131842	150190716	58875	*	intergenic:920	NA	NA	NA	hg19_genes_intergenic	36919
AR_ctr	CD4 mem	chr1	150167662	150167662	1	3	57	Open Sea	NA	NA	NA	NA	0.874088	0.778575	0.0955131	0.164942	2.13e-06	1	0.8	0.0944885	0.928571	0.571429	0.0983109	0	0.00477885	1416247	0	0	13.8571	16.6667	6	9	21	25	6	17	chr1	150127079	150181902	54824	*	inter:1203	NA	NA	NA	hg19_cpg_inter	36919
AR_ctr	CD4 mem	chr10	48647894	48647894	1	1	56	Open Sea	NA	NA	NA	NA	0.775	0.754436	0.0205644	0.0382977	2.14e-06	1	0.416667	0.201212	0.944444	0.333333	0.16057	0	0.00479828	2638088	0	0	17.4286	18.1111	2	2	24	32	5	15	chr10	48444139	48737041	292903	*	intergenic:8434	NA	NA	NA	hg19_genes_intergenic	254303
AR_ctr	CD4 mem	chr10	48647894	48647894	1	1	56	Open Sea	NA	NA	NA	NA	0.775	0.754436	0.0205644	0.0382977	2.14e-06	1	0.416667	0.201212	0.944444	0.333333	0.16057	0	0.00479828	2638088	0	0	17.4286	18.1111	2	2	24	32	5	15	chr10	48443321	48823592	380272	*	inter:9797	NA	NA	NA	hg19_cpg_inter	254303
AR_ctr	CD4 mem	chr6	168394770	168394770	1	4	61	Open Sea	NA	NA	NA	NA	0.960763	0.929899	0.0308637	0.046613	2.18e-06	1	0.885714	0.0398995	0.985294	0.862745	0.0351059	0	0.00489127	2498431	0	0	47	62.6667	12	28	70	135	7	18	chr6	168393502	168394833	1332	-	exon:259594	uc003qwi.3	NA	NA	hg19_genes_exons	5000
AR_ctr	CD4 mem	chr6	168394770	168394770	1	4	61	Open Sea	NA	NA	NA	NA	0.960763	0.929899	0.0308637	0.046613	2.18e-06	1	0.885714	0.0398995	0.985294	0.862745	0.0351059	0	0.00489127	2498431	0	0	47	62.6667	12	28	70	135	7	18	chr6	168394634	168395033	400	-	intronexonboundary:242117	uc003qwi.3	NA	NA	hg19_genes_intronexonboundaries	5000
AR_ctr	CD4 mem	chr6	168394770	168394770	1	4	61	Open Sea	NA	NA	NA	NA	0.960763	0.929899	0.0308637	0.046613	2.18e-06	1	0.885714	0.0398995	0.985294	0.862745	0.0351059	0	0.00489127	2498431	0	0	47	62.6667	12	28	70	135	7	18	chr6	168393566	168395565	2000	*	shelf:14004	NA	NA	NA	hg19_cpg_shelves	5000
AR_ctr	CD4 mem	chr17	72301423	72301423	1	5	60	Open Sea	NA	NA	NA	NA	0.940048	0.88735	0.0526984	0.0823302	2.19e-06	1	0.88	0.049246	0.971429	0.8	0.0446535	0	0.00491358	2028326	0	0	29	34	5	5	54	49	6	17	chr17	72301358	72301581	224	+	CDS:450079	uc002jkf.3	64446	DNAI2	hg19_genes_cds	104
AR_ctr	CD4 mem	chr17	72301423	72301423	1	5	60	Open Sea	NA	NA	NA	NA	0.940048	0.88735	0.0526984	0.0823302	2.19e-06	1	0.88	0.049246	0.971429	0.8	0.0446535	0	0.00491358	2028326	0	0	29	34	5	5	54	49	6	17	chr17	72301358	72301581	224	+	CDS:450091	uc002jkg.3	64446	DNAI2	hg19_genes_cds	104
AR_ctr	CD4 mem	chr17	72301423	72301423	1	5	60	Open Sea	NA	NA	NA	NA	0.940048	0.88735	0.0526984	0.0823302	2.19e-06	1	0.88	0.049246	0.971429	0.8	0.0446535	0	0.00491358	2028326	0	0	29	34	5	5	54	49	6	17	chr17	72301358	72301581	224	+	exon:565599	uc002jkf.3	64446	DNAI2	hg19_genes_exons	104
AR_ctr	CD4 mem	chr17	72301423	72301423	1	5	60	Open Sea	NA	NA	NA	NA	0.940048	0.88735	0.0526984	0.0823302	2.19e-06	1	0.88	0.049246	0.971429	0.8	0.0446535	0	0.00491358	2028326	0	0	29	34	5	5	54	49	6	17	chr17	72301358	72301581	224	+	exon:565613	uc002jkg.3	64446	DNAI2	hg19_genes_exons	104
AR_ctr	CD4 mem	chr17	72301423	72301423	1	5	60	Open Sea	NA	NA	NA	NA	0.940048	0.88735	0.0526984	0.0823302	2.19e-06	1	0.88	0.049246	0.971429	0.8	0.0446535	0	0.00491358	2028326	0	0	29	34	5	5	54	49	6	17	chr17	72301358	72301581	224	+	exon:565626	uc010dfp.3	64446	DNAI2	hg19_genes_exons	104
AR_ctr	CD4 mem	chr17	72301423	72301423	1	5	60	Open Sea	NA	NA	NA	NA	0.940048	0.88735	0.0526984	0.0823302	2.19e-06	1	0.88	0.049246	0.971429	0.8	0.0446535	0	0.00491358	2028326	0	0	29	34	5	5	54	49	6	17	chr17	72301318	72301581	264	+	exon:565632	uc002jki.3	64446	DNAI2	hg19_genes_exons	104
AR_ctr	CD4 mem	chr17	72301423	72301423	1	5	60	Open Sea	NA	NA	NA	NA	0.940048	0.88735	0.0526984	0.0823302	2.19e-06	1	0.88	0.049246	0.971429	0.8	0.0446535	0	0.00491358	2028326	0	0	29	34	5	5	54	49	6	17	chr17	72299778	72303477	3700	-	exon:587370	uc002jkh.1	NA	NA	hg19_genes_exons	104
AR_ctr	CD4 mem	chr17	72301423	72301423	1	5	60	Open Sea	NA	NA	NA	NA	0.940048	0.88735	0.0526984	0.0823302	2.19e-06	1	0.88	0.049246	0.971429	0.8	0.0446535	0	0.00491358	2028326	0	0	29	34	5	5	54	49	6	17	chr17	72301318	72301581	264	+	firstexon:61902	uc002jki.3	64446	DNAI2	hg19_genes_firstexons	104
AR_ctr	CD4 mem	chr17	72301423	72301423	1	5	60	Open Sea	NA	NA	NA	NA	0.940048	0.88735	0.0526984	0.0823302	2.19e-06	1	0.88	0.049246	0.971429	0.8	0.0446535	0	0.00491358	2028326	0	0	29	34	5	5	54	49	6	17	chr17	72301158	72301557	400	+	intronexonboundary:525856	uc002jkf.3	64446	DNAI2	hg19_genes_intronexonboundaries	104
AR_ctr	CD4 mem	chr17	72301423	72301423	1	5	60	Open Sea	NA	NA	NA	NA	0.940048	0.88735	0.0526984	0.0823302	2.19e-06	1	0.88	0.049246	0.971429	0.8	0.0446535	0	0.00491358	2028326	0	0	29	34	5	5	54	49	6	17	chr17	72301158	72301557	400	+	intronexonboundary:525857	uc002jkg.3	64446	DNAI2	hg19_genes_intronexonboundaries	104
AR_ctr	CD4 mem	chr17	72301423	72301423	1	5	60	Open Sea	NA	NA	NA	NA	0.940048	0.88735	0.0526984	0.0823302	2.19e-06	1	0.88	0.049246	0.971429	0.8	0.0446535	0	0.00491358	2028326	0	0	29	34	5	5	54	49	6	17	chr17	72301158	72301557	400	+	intronexonboundary:525858	uc010dfp.3	64446	DNAI2	hg19_genes_intronexonboundaries	104
AR_ctr	CD4 mem	chr17	72301423	72301423	1	5	60	Open Sea	NA	NA	NA	NA	0.940048	0.88735	0.0526984	0.0823302	2.19e-06	1	0.88	0.049246	0.971429	0.8	0.0446535	0	0.00491358	2028326	0	0	29	34	5	5	54	49	6	17	chr17	72301381	72301780	400	+	exonintronboundary:531425	uc002jkf.3	64446	DNAI2	hg19_genes_exonintronboundaries	104
AR_ctr	CD4 mem	chr17	72301423	72301423	1	5	60	Open Sea	NA	NA	NA	NA	0.940048	0.88735	0.0526984	0.0823302	2.19e-06	1	0.88	0.049246	0.971429	0.8	0.0446535	0	0.00491358	2028326	0	0	29	34	5	5	54	49	6	17	chr17	72301381	72301780	400	+	exonintronboundary:531426	uc002jkg.3	64446	DNAI2	hg19_genes_exonintronboundaries	104
AR_ctr	CD4 mem	chr17	72301423	72301423	1	5	60	Open Sea	NA	NA	NA	NA	0.940048	0.88735	0.0526984	0.0823302	2.19e-06	1	0.88	0.049246	0.971429	0.8	0.0446535	0	0.00491358	2028326	0	0	29	34	5	5	54	49	6	17	chr17	72301381	72301780	400	+	exonintronboundary:531427	uc010dfp.3	64446	DNAI2	hg19_genes_exonintronboundaries	104
AR_ctr	CD4 mem	chr17	72301423	72301423	1	5	60	Open Sea	NA	NA	NA	NA	0.940048	0.88735	0.0526984	0.0823302	2.19e-06	1	0.88	0.049246	0.971429	0.8	0.0446535	0	0.00491358	2028326	0	0	29	34	5	5	54	49	6	17	chr17	72301381	72301780	400	+	exonintronboundary:531428	uc002jki.3	64446	DNAI2	hg19_genes_exonintronboundaries	104
AR_ctr	CD4 mem	chr17	72301423	72301423	1	5	60	Open Sea	NA	NA	NA	NA	0.940048	0.88735	0.0526984	0.0823302	2.19e-06	1	0.88	0.049246	0.971429	0.8	0.0446535	0	0.00491358	2028326	0	0	29	34	5	5	54	49	6	17	chr17	72299778	72303339	3562	-	3UTR:49276	uc002jkh.1	NA	NA	hg19_genes_3UTRs	104
AR_ctr	CD4 mem	chr17	72301423	72301423	1	5	60	Open Sea	NA	NA	NA	NA	0.940048	0.88735	0.0526984	0.0823302	2.19e-06	1	0.88	0.049246	0.971429	0.8	0.0446535	0	0.00491358	2028326	0	0	29	34	5	5	54	49	6	17	chr17	72274513	72317948	43436	*	inter:15746	NA	NA	NA	hg19_cpg_inter	104
AR_ctr	CD4 mem	chr3	171366546	171366546	1	7	53	Open Sea	NA	NA	NA	NA	0.847928	0.743821	0.104107	0.186634	2.21e-06	1	0.666667	0.134824	0.944444	0.5	0.15547	0	0.00495458	1315280	0	0	14	12.3333	5	2	23	22	5	13	chr3	171362814	171377002	14189	-	intron:148599	uc003fhs.3	5337	PLD1	hg19_genes_introns	194591
AR_ctr	CD4 mem	chr3	171366546	171366546	1	7	53	Open Sea	NA	NA	NA	NA	0.847928	0.743821	0.104107	0.186634	2.21e-06	1	0.666667	0.134824	0.944444	0.5	0.15547	0	0.00495458	1315280	0	0	14	12.3333	5	2	23	22	5	13	chr3	171362814	171377002	14189	-	intron:148625	uc003fht.3	5337	PLD1	hg19_genes_introns	194591
AR_ctr	CD4 mem	chr3	171366546	171366546	1	7	53	Open Sea	NA	NA	NA	NA	0.847928	0.743821	0.104107	0.186634	2.21e-06	1	0.666667	0.134824	0.944444	0.5	0.15547	0	0.00495458	1315280	0	0	14	12.3333	5	2	23	22	5	13	chr3	171362814	171377002	14189	-	intron:148649	uc003fhu.4	5337	PLD1	hg19_genes_introns	194591
AR_ctr	CD4 mem	chr3	171366546	171366546	1	7	53	Open Sea	NA	NA	NA	NA	0.847928	0.743821	0.104107	0.186634	2.21e-06	1	0.666667	0.134824	0.944444	0.5	0.15547	0	0.00495458	1315280	0	0	14	12.3333	5	2	23	22	5	13	chr3	171182965	171523617	340653	*	inter:3997	NA	NA	NA	hg19_cpg_inter	194591
AR_ctr	CD4 mem	chr17	1811491	1811491	1	5	53	Island	NA	NA	NA	NA	0.11828	0.176572	-0.0582921	-0.540439	2.24e-06	0.375	0	0.135097	0.333333	0.09375	0.0644012	0	0.00499794	1267780	0	0	17	29.3889	8	3	31	62	6	17	chr17	1802849	1837970	35122	*	intergenic:12602	NA	NA	NA	hg19_genes_intergenic	78217
AR_ctr	CD4 mem	chr17	1811491	1811491	1	5	53	Island	NA	NA	NA	NA	0.11828	0.176572	-0.0582921	-0.540439	2.24e-06	0.375	0	0.135097	0.333333	0.09375	0.0644012	0	0.00499794	1267780	0	0	17	29.3889	8	3	31	62	6	17	chr17	1811474	1812097	624	*	island:20156	NA	NA	NA	hg19_cpg_islands	78217
AR_ctr	CD4 mem	chr7	9660294	9660294	1	7	54	Open Sea	NA	NA	NA	NA	0.93042	0.820051	0.110369	0.180105	2.26e-06	1	0.84375	0.0674439	0.962963	0.666667	0.0923455	0	0.0050412	1343360	0	0	26.2857	26.7778	10	15	34	39	7	18	chr7	9234488	9668899	434412	*	intergenic:6128	NA	NA	NA	hg19_genes_intergenic	13604
AR_ctr	CD4 mem	chr7	9660294	9660294	1	7	54	Open Sea	NA	NA	NA	NA	0.93042	0.820051	0.110369	0.180105	2.26e-06	1	0.84375	0.0674439	0.962963	0.666667	0.0923455	0	0.0050412	1343360	0	0	26.2857	26.7778	10	15	34	39	7	18	chr7	8487712	9761661	1273950	*	inter:6937	NA	NA	NA	hg19_cpg_inter	13604
AR_ctr	CD4 mem	chr11	133098450	133098450	1	9	74	Open Sea	NA	NA	NA	NA	0.0794726	0.125581	-0.0461088	-0.599641	2.35e-06	0.16129	0	0.0700132	0.25	0.025	0.0588566	0	0.00522469	1531241	0	0	27.5714	27.1667	18	4	45	40	7	17	chr11	132812906	133402158	589253	-	intron:370111	uc001qgu.3	4978	OPCML	hg19_genes_introns	702746
AR_ctr	CD4 mem	chr11	133098450	133098450	1	9	74	Open Sea	NA	NA	NA	NA	0.0794726	0.125581	-0.0461088	-0.599641	2.35e-06	0.16129	0	0.0700132	0.25	0.025	0.0588566	0	0.00522469	1531241	0	0	27.5714	27.1667	18	4	45	40	7	17	chr11	132957308	133226884	269577	*	inter:11360	NA	NA	NA	hg19_cpg_inter	702746
AR_ctr	CD4 mem	chr16	2146678	2146678	1	5	52	Open Sea	NA	NA	NA	NA	0.956912	0.914275	0.0426376	0.0650633	2.36e-06	1	0.87234	0.0467334	0.971429	0.868421	0.0404316	0	0.00525782	2231635	0	0	43.2857	40.1667	6	25	65	54	6	18	chr16	1903368	2173074	269707	-	intron:479126	uc021tak.1	NA	NA	hg19_genes_introns	13979
AR_ctr	CD4 mem	chr16	2146678	2146678	1	5	52	Open Sea	NA	NA	NA	NA	0.956912	0.914275	0.0426376	0.0650633	2.36e-06	1	0.87234	0.0467334	0.971429	0.868421	0.0404316	0	0.00525782	2231635	0	0	43.2857	40.1667	6	25	65	54	6	18	chr16	2144212	2147148	2937	-	intron:479221	uc002cos.1	5310	PKD1	hg19_genes_introns	13979
AR_ctr	CD4 mem	chr16	2146678	2146678	1	5	52	Open Sea	NA	NA	NA	NA	0.956912	0.914275	0.0426376	0.0650633	2.36e-06	1	0.87234	0.0467334	0.971429	0.868421	0.0404316	0	0.00525782	2231635	0	0	43.2857	40.1667	6	25	65	54	6	18	chr16	2144212	2147148	2937	-	intron:479266	uc002cot.1	5310	PKD1	hg19_genes_introns	13979
AR_ctr	CD4 mem	chr16	2146678	2146678	1	5	52	Open Sea	NA	NA	NA	NA	0.956912	0.914275	0.0426376	0.0650633	2.36e-06	1	0.87234	0.0467334	0.971429	0.868421	0.0404316	0	0.00525782	2231635	0	0	43.2857	40.1667	6	25	65	54	6	18	chr16	2144212	2147148	2937	-	intron:479308	uc010bse.1	5310	PKD1	hg19_genes_introns	13979
AR_ctr	CD4 mem	chr16	2146678	2146678	1	5	52	Open Sea	NA	NA	NA	NA	0.956912	0.914275	0.0426376	0.0650633	2.36e-06	1	0.87234	0.0467334	0.971429	0.868421	0.0404316	0	0.00525782	2231635	0	0	43.2857	40.1667	6	25	65	54	6	18	chr16	2144171	2147842	3672	*	shelf:29614	NA	NA	NA	hg19_cpg_shelves	13979
AR_ctr	CD4 mem	chr9	136810643	136810643	1	4	63	Open Sea	NA	NA	NA	NA	0.81862	0.643036	0.175584	0.343548	2.37e-06	1	0.512195	0.17064	0.885714	0.354839	0.145423	0	0.00527464	880888	0	0	24.5714	27.6111	3	10	42	48	6	18	chr9	136804342	136857196	52855	-	intron:306525	uc004cer.3	7410	VAV2	hg19_genes_introns	79916
AR_ctr	CD4 mem	chr9	136810643	136810643	1	4	63	Open Sea	NA	NA	NA	NA	0.81862	0.643036	0.175584	0.343548	2.37e-06	1	0.512195	0.17064	0.885714	0.354839	0.145423	0	0.00527464	880888	0	0	24.5714	27.6111	3	10	42	48	6	18	chr9	136804342	136857196	52855	-	intron:306554	uc004ces.3	7410	VAV2	hg19_genes_introns	79916
AR_ctr	CD4 mem	chr9	136810643	136810643	1	4	63	Open Sea	NA	NA	NA	NA	0.81862	0.643036	0.175584	0.343548	2.37e-06	1	0.512195	0.17064	0.885714	0.354839	0.145423	0	0.00527464	880888	0	0	24.5714	27.6111	3	10	42	48	6	18	chr9	136762903	136830189	67287	*	inter:9386	NA	NA	NA	hg19_cpg_inter	79916
AR_ctr	CD4 mem	chr5	103109	103109	1	2	53	Open Sea	NA	NA	NA	NA	0.738984	0.576797	0.162187	0.352074	2.38e-06	1	0.411765	0.244266	0.857143	0.272727	0.150119	0	0.00528728	866858	0	0	10.8571	15.5	1	5	19	31	5	15	chr5	1	135372	135372	*	intergenic:4381	NA	NA	NA	hg19_genes_intergenic	37262
AR_ctr	CD4 mem	chr5	103109	103109	1	2	53	Open Sea	NA	NA	NA	NA	0.738984	0.576797	0.162187	0.352074	2.38e-06	1	0.411765	0.244266	0.857143	0.272727	0.150119	0	0.00528728	866858	0	0	10.8571	15.5	1	5	19	31	5	15	chr5	96439	160710	64272	*	inter:4911	NA	NA	NA	hg19_cpg_inter	37262
AR_ctr	CD4 mem	chr4	66665500	66665500	1	5	50	Open Sea	NA	NA	NA	NA	0.846224	0.775776	0.0704474	0.123869	2.43e-06	1	0.6	0.140049	0.965517	0.428571	0.168339	0	0.00539526	1669573	0	0	16.5714	20.4444	4	2	30	37	5	17	chr4	66559105	66926099	366995	*	intergenic:3894	NA	NA	NA	hg19_genes_intergenic	129820
AR_ctr	CD4 mem	chr4	66665500	66665500	1	5	50	Open Sea	NA	NA	NA	NA	0.846224	0.775776	0.0704474	0.123869	2.43e-06	1	0.6	0.140049	0.965517	0.428571	0.168339	0	0.00539526	1669573	0	0	16.5714	20.4444	4	2	30	37	5	17	chr4	66540675	68406993	1866319	*	inter:4499	NA	NA	NA	hg19_cpg_inter	129820
AR_ctr	CD4 mem	chr19	36793953	36793953	1	5	59	Island	NA	NA	NA	NA	0.97353	0.960109	0.0134209	0.0198221	2.48e-06	1	0.930233	0.0254958	0.977273	0.940299	0.0123569	0	0.00550254	3000903	0	0	85.5714	103.833	5	31	139	250	6	18	chr19	36729676	36797244	67569	*	intergenic:14130	NA	NA	NA	hg19_genes_intergenic	8290
AR_ctr	CD4 mem	chr19	36793953	36793953	1	5	59	Island	NA	NA	NA	NA	0.97353	0.960109	0.0134209	0.0198221	2.48e-06	1	0.930233	0.0254958	0.977273	0.940299	0.0123569	0	0.00550254	3000903	0	0	85.5714	103.833	5	31	139	250	6	18	chr19	36793536	36793953	418	*	island:23747	NA	NA	NA	hg19_cpg_islands	8290
AR_ctr	CD4 mem	chr9	137760958	137760958	1	7	70	Open Sea	NA	NA	NA	NA	0.765572	0.598782	0.166791	0.349336	2.5e-06	1	0.454545	0.20131	0.944444	0	0.237696	0	0.0055304	871292	1	0	12.1429	12.6667	0	2	20	24	5	12	chr9	137712056	137764394	52339	-	intron:306587	uc004cff.3	101448202	LOC101448202	hg19_genes_introns	11698
AR_ctr	CD4 mem	chr9	137760958	137760958	1	7	70	Open Sea	NA	NA	NA	NA	0.765572	0.598782	0.166791	0.349336	2.5e-06	1	0.454545	0.20131	0.944444	0	0.237696	0	0.0055304	871292	1	0	12.1429	12.6667	0	2	20	24	5	12	chr9	137738476	137963110	224635	*	inter:9409	NA	NA	NA	hg19_cpg_inter	11698
AR_ctr	CD4 mem	chr5	686494	686494	1	2	59	Open Sea	NA	NA	NA	NA	0.883508	0.854214	0.0292939	0.0480919	2.56e-06	1	0.764706	0.0945766	0.965517	0.72973	0.0754463	0	0.00563999	2476307	0	0	31.5714	42.5	13	12	58	88	7	18	chr5	678180	693392	15213	-	intron:189237	uc003jbh.4	11076	TPPP	hg19_genes_introns	74088
AR_ctr	CD4 mem	chr5	686494	686494	1	2	59	Open Sea	NA	NA	NA	NA	0.883508	0.854214	0.0292939	0.0480919	2.56e-06	1	0.764706	0.0945766	0.965517	0.72973	0.0754463	0	0.00563999	2476307	0	0	31.5714	42.5	13	12	58	88	7	18	chr5	682136	687080	4945	*	inter:4934	NA	NA	NA	hg19_cpg_inter	74088
AR_ctr	CD4 mem	chr9	8505351	8505351	1	5	53	Open Sea	NA	NA	NA	NA	0.79932	0.652843	0.146477	0.288043	2.62e-06	1	0.666667	0.139922	0.826087	0.142857	0.163167	0	0.00578501	993216	0	0	12.8571	16.5	6	2	21	37	5	14	chr9	8504406	8507300	2895	-	intron:295312	uc003zkp.3	5789	PTPRD	hg19_genes_introns	352781
AR_ctr	CD4 mem	chr9	8505351	8505351	1	5	53	Open Sea	NA	NA	NA	NA	0.79932	0.652843	0.146477	0.288043	2.62e-06	1	0.666667	0.139922	0.826087	0.142857	0.163167	0	0.00578501	993216	0	0	12.8571	16.5	6	2	21	37	5	14	chr9	8504406	8507300	2895	-	intron:295342	uc003zkq.3	5789	PTPRD	hg19_genes_introns	352781
AR_ctr	CD4 mem	chr9	8505351	8505351	1	5	53	Open Sea	NA	NA	NA	NA	0.79932	0.652843	0.146477	0.288043	2.62e-06	1	0.666667	0.139922	0.826087	0.142857	0.163167	0	0.00578501	993216	0	0	12.8571	16.5	6	2	21	37	5	14	chr9	8504406	8507300	2895	-	intron:295371	uc003zkr.3	5789	PTPRD	hg19_genes_introns	352781
AR_ctr	CD4 mem	chr9	8505351	8505351	1	5	53	Open Sea	NA	NA	NA	NA	0.79932	0.652843	0.146477	0.288043	2.62e-06	1	0.666667	0.139922	0.826087	0.142857	0.163167	0	0.00578501	993216	0	0	12.8571	16.5	6	2	21	37	5	14	chr9	8504406	8507300	2895	-	intron:295400	uc003zks.3	5789	PTPRD	hg19_genes_introns	352781
AR_ctr	CD4 mem	chr9	8505351	8505351	1	5	53	Open Sea	NA	NA	NA	NA	0.79932	0.652843	0.146477	0.288043	2.62e-06	1	0.666667	0.139922	0.826087	0.142857	0.163167	0	0.00578501	993216	0	0	12.8571	16.5	6	2	21	37	5	14	chr9	8504406	8507300	2895	-	intron:295428	uc022bdj.1	5789	PTPRD	hg19_genes_introns	352781
AR_ctr	CD4 mem	chr9	8505351	8505351	1	5	53	Open Sea	NA	NA	NA	NA	0.79932	0.652843	0.146477	0.288043	2.62e-06	1	0.666667	0.139922	0.826087	0.142857	0.163167	0	0.00578501	993216	0	0	12.8571	16.5	6	2	21	37	5	14	chr9	8504406	8507300	2895	-	intron:295461	uc003zkk.3	5789	PTPRD	hg19_genes_introns	352781
AR_ctr	CD4 mem	chr9	8505351	8505351	1	5	53	Open Sea	NA	NA	NA	NA	0.79932	0.652843	0.146477	0.288043	2.62e-06	1	0.666667	0.139922	0.826087	0.142857	0.163167	0	0.00578501	993216	0	0	12.8571	16.5	6	2	21	37	5	14	chr9	7803847	8709281	905435	*	inter:8646	NA	NA	NA	hg19_cpg_inter	352781
AR_ctr	CD4 mem	chr9	139893157	139893157	1	3	60	Open Sea	NA	NA	NA	NA	0.778847	0.634513	0.144334	0.291536	2.65e-06	1	0.515152	0.171751	0.909091	0.4	0.187641	0	0.00583262	984914	0	0	22	23.1667	3	10	37	33	6	18	chr9	139892025	139896024	4000	-	1to5kb:37482	uc004ckj.1	9022	CLIC3	hg19_genes_1to5kb	6286
AR_ctr	CD4 mem	chr9	139893157	139893157	1	3	60	Open Sea	NA	NA	NA	NA	0.778847	0.634513	0.144334	0.291536	2.65e-06	1	0.515152	0.171751	0.909091	0.4	0.187641	0	0.00583262	984914	0	0	22	23.1667	3	10	37	33	6	18	chr9	139892344	139894343	2000	*	shelf:19887	NA	NA	NA	hg19_cpg_shelves	6286
AR_ctr	CD4 mem	chr19	19855891	19855891	1	2	42	Open Sea	NA	NA	NA	NA	0.955623	0.913968	0.0416553	0.0636177	2.68e-06	1	0.823529	0.0608733	0.956522	0.818182	0.041005	0	0.00589685	2250223	0	0	36.4286	45.6667	12	21	48	66	7	18	chr19	19855485	19859484	4000	-	1to5kb:68984	uc021uqy.1	NA	NA	hg19_genes_1to5kb	3683
AR_ctr	CD4 mem	chr19	19855891	19855891	1	2	42	Open Sea	NA	NA	NA	NA	0.955623	0.913968	0.0416553	0.0636177	2.68e-06	1	0.823529	0.0608733	0.956522	0.818182	0.041005	0	0.00589685	2250223	0	0	36.4286	45.6667	12	21	48	66	7	18	chr19	19855827	19856046	220	-	5UTR:94715	uc002nnl.2	NA	NA	hg19_genes_5UTRs	3683
AR_ctr	CD4 mem	chr19	19855891	19855891	1	2	42	Open Sea	NA	NA	NA	NA	0.955623	0.913968	0.0416553	0.0636177	2.68e-06	1	0.823529	0.0608733	0.956522	0.818182	0.041005	0	0.00589685	2250223	0	0	36.4286	45.6667	12	21	48	66	7	18	chr19	19855285	19856046	762	-	exon:628220	uc002nnl.2	NA	NA	hg19_genes_exons	3683
AR_ctr	CD4 mem	chr19	19855891	19855891	1	2	42	Open Sea	NA	NA	NA	NA	0.955623	0.913968	0.0416553	0.0636177	2.68e-06	1	0.823529	0.0608733	0.956522	0.818182	0.041005	0	0.00589685	2250223	0	0	36.4286	45.6667	12	21	48	66	7	18	chr19	19855285	19856046	762	-	firstexon:68985	uc002nnl.2	NA	NA	hg19_genes_firstexons	3683
AR_ctr	CD4 mem	chr19	19855891	19855891	1	2	42	Open Sea	NA	NA	NA	NA	0.955623	0.913968	0.0416553	0.0636177	2.68e-06	1	0.823529	0.0608733	0.956522	0.818182	0.041005	0	0.00589685	2250223	0	0	36.4286	45.6667	12	21	48	66	7	18	chr19	19855847	19856246	400	-	intronexonboundary:584528	uc002nnl.2	NA	NA	hg19_genes_intronexonboundaries	3683
AR_ctr	CD4 mem	chr19	19855891	19855891	1	2	42	Open Sea	NA	NA	NA	NA	0.955623	0.913968	0.0416553	0.0636177	2.68e-06	1	0.823529	0.0608733	0.956522	0.818182	0.041005	0	0.00589685	2250223	0	0	36.4286	45.6667	12	21	48	66	7	18	chr19	19847944	19967577	119634	*	inter:16984	NA	NA	NA	hg19_cpg_inter	3683
AR_ctr	CD4 mem	chr2	239168991	239168991	1	3	59	Open Sea	NA	NA	NA	NA	0.920873	0.774741	0.146132	0.246369	2.69e-06	1	0.85	0.0607305	0.942857	0.518519	0.130825	0	0.0059184	1102596	0	0	20.8571	28.1111	8	9	30	50	6	17	chr2	239168695	239169468	774	-	intron:112465	uc002vyc.3	8864	PER2	hg19_genes_introns	28663
AR_ctr	CD4 mem	chr2	239168991	239168991	1	3	59	Open Sea	NA	NA	NA	NA	0.920873	0.774741	0.146132	0.246369	2.69e-06	1	0.85	0.0607305	0.942857	0.518519	0.130825	0	0.0059184	1102596	0	0	20.8571	28.1111	8	9	30	50	6	17	chr2	239168695	239169468	774	-	intron:112486	uc010znv.1	8864	PER2	hg19_genes_introns	28663
AR_ctr	CD4 mem	chr2	239168991	239168991	1	3	59	Open Sea	NA	NA	NA	NA	0.920873	0.774741	0.146132	0.246369	2.69e-06	1	0.85	0.0607305	0.942857	0.518519	0.130825	0	0.0059184	1102596	0	0	20.8571	28.1111	8	9	30	50	6	17	chr2	239153901	239192923	39023	*	inter:3097	NA	NA	NA	hg19_cpg_inter	28663
AR_ctr	CD4 mem	chr17	76935064	76935064	1	4	57	Open Sea	NA	NA	NA	NA	0.938537	0.896805	0.0417312	0.0649104	2.7e-06	1	0.880952	0.0454121	0.959184	0.741379	0.0569229	0	0.00593093	2234268	0	0	53.2857	70.1667	9	6	87	157	6	17	chr17	76926473	76967334	40862	*	intergenic:13329	NA	NA	NA	hg19_genes_intergenic	83950
AR_ctr	CD4 mem	chr17	76935064	76935064	1	4	57	Open Sea	NA	NA	NA	NA	0.938537	0.896805	0.0417312	0.0649104	2.7e-06	1	0.880952	0.0454121	0.959184	0.741379	0.0569229	0	0.00593093	2234268	0	0	53.2857	70.1667	9	6	87	157	6	17	chr17	76925962	76985642	59681	*	inter:15863	NA	NA	NA	hg19_cpg_inter	83950
AR_ctr	CD4 mem	chr3	49153758	49153758	1	2	64	Open Sea	NA	NA	NA	NA	0.816576	0.733619	0.0829577	0.152585	2.73e-06	1	0.526316	0.181473	0.933333	0.464286	0.148402	0	0.00597366	1479673	0	0	13.5714	16.9444	5	8	19	29	5	16	chr3	49153713	49153784	72	-	CDS:124682	uc003cwa.3	10869	USP19	hg19_genes_cds	55258
AR_ctr	CD4 mem	chr3	49153758	49153758	1	2	64	Open Sea	NA	NA	NA	NA	0.816576	0.733619	0.0829577	0.152585	2.73e-06	1	0.526316	0.181473	0.933333	0.464286	0.148402	0	0.00597366	1479673	0	0	13.5714	16.9444	5	8	19	29	5	16	chr3	49153713	49153784	72	-	CDS:124708	uc003cvz.4	10869	USP19	hg19_genes_cds	55258
AR_ctr	CD4 mem	chr3	49153758	49153758	1	2	64	Open Sea	NA	NA	NA	NA	0.816576	0.733619	0.0829577	0.152585	2.73e-06	1	0.526316	0.181473	0.933333	0.464286	0.148402	0	0.00597366	1479673	0	0	13.5714	16.9444	5	8	19	29	5	16	chr3	49153713	49153784	72	-	CDS:124734	uc003cwb.3	10869	USP19	hg19_genes_cds	55258
AR_ctr	CD4 mem	chr3	49153758	49153758	1	2	64	Open Sea	NA	NA	NA	NA	0.816576	0.733619	0.0829577	0.152585	2.73e-06	1	0.526316	0.181473	0.933333	0.464286	0.148402	0	0.00597366	1479673	0	0	13.5714	16.9444	5	8	19	29	5	16	chr3	49153713	49153784	72	-	CDS:124747	uc011bcg.2	10869	USP19	hg19_genes_cds	55258
AR_ctr	CD4 mem	chr3	49153758	49153758	1	2	64	Open Sea	NA	NA	NA	NA	0.816576	0.733619	0.0829577	0.152585	2.73e-06	1	0.526316	0.181473	0.933333	0.464286	0.148402	0	0.00597366	1479673	0	0	13.5714	16.9444	5	8	19	29	5	16	chr3	49153713	49153784	72	-	CDS:124768	uc003cwc.2	10869	USP19	hg19_genes_cds	55258
AR_ctr	CD4 mem	chr3	49153758	49153758	1	2	64	Open Sea	NA	NA	NA	NA	0.816576	0.733619	0.0829577	0.152585	2.73e-06	1	0.526316	0.181473	0.933333	0.464286	0.148402	0	0.00597366	1479673	0	0	13.5714	16.9444	5	8	19	29	5	16	chr3	49153713	49153784	72	-	CDS:124793	uc003cwd.2	10869	USP19	hg19_genes_cds	55258
AR_ctr	CD4 mem	chr3	49153758	49153758	1	2	64	Open Sea	NA	NA	NA	NA	0.816576	0.733619	0.0829577	0.152585	2.73e-06	1	0.526316	0.181473	0.933333	0.464286	0.148402	0	0.00597366	1479673	0	0	13.5714	16.9444	5	8	19	29	5	16	chr3	49153713	49153784	72	-	CDS:124819	uc011bch.2	10869	USP19	hg19_genes_cds	55258
AR_ctr	CD4 mem	chr3	49153758	49153758	1	2	64	Open Sea	NA	NA	NA	NA	0.816576	0.733619	0.0829577	0.152585	2.73e-06	1	0.526316	0.181473	0.933333	0.464286	0.148402	0	0.00597366	1479673	0	0	13.5714	16.9444	5	8	19	29	5	16	chr3	49153713	49153784	72	-	CDS:124845	uc011bci.2	10869	USP19	hg19_genes_cds	55258
AR_ctr	CD4 mem	chr3	49153758	49153758	1	2	64	Open Sea	NA	NA	NA	NA	0.816576	0.733619	0.0829577	0.152585	2.73e-06	1	0.526316	0.181473	0.933333	0.464286	0.148402	0	0.00597366	1479673	0	0	13.5714	16.9444	5	8	19	29	5	16	chr3	49153713	49153784	72	-	exon:153838	uc003cwa.3	10869	USP19	hg19_genes_exons	55258
AR_ctr	CD4 mem	chr3	49153758	49153758	1	2	64	Open Sea	NA	NA	NA	NA	0.816576	0.733619	0.0829577	0.152585	2.73e-06	1	0.526316	0.181473	0.933333	0.464286	0.148402	0	0.00597366	1479673	0	0	13.5714	16.9444	5	8	19	29	5	16	chr3	49153713	49153784	72	-	exon:153865	uc003cvz.4	10869	USP19	hg19_genes_exons	55258
AR_ctr	CD4 mem	chr3	49153758	49153758	1	2	64	Open Sea	NA	NA	NA	NA	0.816576	0.733619	0.0829577	0.152585	2.73e-06	1	0.526316	0.181473	0.933333	0.464286	0.148402	0	0.00597366	1479673	0	0	13.5714	16.9444	5	8	19	29	5	16	chr3	49153713	49153784	72	-	exon:153892	uc003cwb.3	10869	USP19	hg19_genes_exons	55258
AR_ctr	CD4 mem	chr3	49153758	49153758	1	2	64	Open Sea	NA	NA	NA	NA	0.816576	0.733619	0.0829577	0.152585	2.73e-06	1	0.526316	0.181473	0.933333	0.464286	0.148402	0	0.00597366	1479673	0	0	13.5714	16.9444	5	8	19	29	5	16	chr3	49153713	49153784	72	-	exon:153907	uc011bcg.2	10869	USP19	hg19_genes_exons	55258
AR_ctr	CD4 mem	chr3	49153758	49153758	1	2	64	Open Sea	NA	NA	NA	NA	0.816576	0.733619	0.0829577	0.152585	2.73e-06	1	0.526316	0.181473	0.933333	0.464286	0.148402	0	0.00597366	1479673	0	0	13.5714	16.9444	5	8	19	29	5	16	chr3	49153713	49153784	72	-	exon:153929	uc003cwc.2	10869	USP19	hg19_genes_exons	55258
AR_ctr	CD4 mem	chr3	49153758	49153758	1	2	64	Open Sea	NA	NA	NA	NA	0.816576	0.733619	0.0829577	0.152585	2.73e-06	1	0.526316	0.181473	0.933333	0.464286	0.148402	0	0.00597366	1479673	0	0	13.5714	16.9444	5	8	19	29	5	16	chr3	49153713	49153784	72	-	exon:153955	uc003cwd.2	10869	USP19	hg19_genes_exons	55258
AR_ctr	CD4 mem	chr3	49153758	49153758	1	2	64	Open Sea	NA	NA	NA	NA	0.816576	0.733619	0.0829577	0.152585	2.73e-06	1	0.526316	0.181473	0.933333	0.464286	0.148402	0	0.00597366	1479673	0	0	13.5714	16.9444	5	8	19	29	5	16	chr3	49153713	49153784	72	-	exon:153982	uc011bch.2	10869	USP19	hg19_genes_exons	55258
AR_ctr	CD4 mem	chr3	49153758	49153758	1	2	64	Open Sea	NA	NA	NA	NA	0.816576	0.733619	0.0829577	0.152585	2.73e-06	1	0.526316	0.181473	0.933333	0.464286	0.148402	0	0.00597366	1479673	0	0	13.5714	16.9444	5	8	19	29	5	16	chr3	49153713	49153784	72	-	exon:154009	uc011bci.2	10869	USP19	hg19_genes_exons	55258
AR_ctr	CD4 mem	chr3	49153758	49153758	1	2	64	Open Sea	NA	NA	NA	NA	0.816576	0.733619	0.0829577	0.152585	2.73e-06	1	0.526316	0.181473	0.933333	0.464286	0.148402	0	0.00597366	1479673	0	0	13.5714	16.9444	5	8	19	29	5	16	chr3	49153396	49153795	400	-	intronexonboundary:142973	uc003cwa.3	10869	USP19	hg19_genes_intronexonboundaries	55258
AR_ctr	CD4 mem	chr3	49153758	49153758	1	2	64	Open Sea	NA	NA	NA	NA	0.816576	0.733619	0.0829577	0.152585	2.73e-06	1	0.526316	0.181473	0.933333	0.464286	0.148402	0	0.00597366	1479673	0	0	13.5714	16.9444	5	8	19	29	5	16	chr3	49153396	49153795	400	-	intronexonboundary:142974	uc003cvz.4	10869	USP19	hg19_genes_intronexonboundaries	55258
AR_ctr	CD4 mem	chr3	49153758	49153758	1	2	64	Open Sea	NA	NA	NA	NA	0.816576	0.733619	0.0829577	0.152585	2.73e-06	1	0.526316	0.181473	0.933333	0.464286	0.148402	0	0.00597366	1479673	0	0	13.5714	16.9444	5	8	19	29	5	16	chr3	49153396	49153795	400	-	intronexonboundary:142975	uc003cwb.3	10869	USP19	hg19_genes_intronexonboundaries	55258
AR_ctr	CD4 mem	chr3	49153758	49153758	1	2	64	Open Sea	NA	NA	NA	NA	0.816576	0.733619	0.0829577	0.152585	2.73e-06	1	0.526316	0.181473	0.933333	0.464286	0.148402	0	0.00597366	1479673	0	0	13.5714	16.9444	5	8	19	29	5	16	chr3	49153396	49153795	400	-	intronexonboundary:142976	uc011bcg.2	10869	USP19	hg19_genes_intronexonboundaries	55258
AR_ctr	CD4 mem	chr3	49153758	49153758	1	2	64	Open Sea	NA	NA	NA	NA	0.816576	0.733619	0.0829577	0.152585	2.73e-06	1	0.526316	0.181473	0.933333	0.464286	0.148402	0	0.00597366	1479673	0	0	13.5714	16.9444	5	8	19	29	5	16	chr3	49153396	49153795	400	-	intronexonboundary:142977	uc003cwc.2	10869	USP19	hg19_genes_intronexonboundaries	55258
AR_ctr	CD4 mem	chr3	49153758	49153758	1	2	64	Open Sea	NA	NA	NA	NA	0.816576	0.733619	0.0829577	0.152585	2.73e-06	1	0.526316	0.181473	0.933333	0.464286	0.148402	0	0.00597366	1479673	0	0	13.5714	16.9444	5	8	19	29	5	16	chr3	49153396	49153795	400	-	intronexonboundary:142978	uc003cwd.2	10869	USP19	hg19_genes_intronexonboundaries	55258
AR_ctr	CD4 mem	chr3	49153758	49153758	1	2	64	Open Sea	NA	NA	NA	NA	0.816576	0.733619	0.0829577	0.152585	2.73e-06	1	0.526316	0.181473	0.933333	0.464286	0.148402	0	0.00597366	1479673	0	0	13.5714	16.9444	5	8	19	29	5	16	chr3	49153396	49153795	400	-	intronexonboundary:142979	uc011bch.2	10869	USP19	hg19_genes_intronexonboundaries	55258
AR_ctr	CD4 mem	chr3	49153758	49153758	1	2	64	Open Sea	NA	NA	NA	NA	0.816576	0.733619	0.0829577	0.152585	2.73e-06	1	0.526316	0.181473	0.933333	0.464286	0.148402	0	0.00597366	1479673	0	0	13.5714	16.9444	5	8	19	29	5	16	chr3	49153396	49153795	400	-	intronexonboundary:142980	uc011bci.2	10869	USP19	hg19_genes_intronexonboundaries	55258
AR_ctr	CD4 mem	chr3	49153758	49153758	1	2	64	Open Sea	NA	NA	NA	NA	0.816576	0.733619	0.0829577	0.152585	2.73e-06	1	0.526316	0.181473	0.933333	0.464286	0.148402	0	0.00597366	1479673	0	0	13.5714	16.9444	5	8	19	29	5	16	chr3	49153585	49153984	400	-	intronexonboundary:142981	uc003cwa.3	10869	USP19	hg19_genes_intronexonboundaries	55258
AR_ctr	CD4 mem	chr3	49153758	49153758	1	2	64	Open Sea	NA	NA	NA	NA	0.816576	0.733619	0.0829577	0.152585	2.73e-06	1	0.526316	0.181473	0.933333	0.464286	0.148402	0	0.00597366	1479673	0	0	13.5714	16.9444	5	8	19	29	5	16	chr3	49153585	49153984	400	-	intronexonboundary:142982	uc003cvz.4	10869	USP19	hg19_genes_intronexonboundaries	55258
AR_ctr	CD4 mem	chr3	49153758	49153758	1	2	64	Open Sea	NA	NA	NA	NA	0.816576	0.733619	0.0829577	0.152585	2.73e-06	1	0.526316	0.181473	0.933333	0.464286	0.148402	0	0.00597366	1479673	0	0	13.5714	16.9444	5	8	19	29	5	16	chr3	49153585	49153984	400	-	intronexonboundary:142983	uc003cwb.3	10869	USP19	hg19_genes_intronexonboundaries	55258
AR_ctr	CD4 mem	chr3	49153758	49153758	1	2	64	Open Sea	NA	NA	NA	NA	0.816576	0.733619	0.0829577	0.152585	2.73e-06	1	0.526316	0.181473	0.933333	0.464286	0.148402	0	0.00597366	1479673	0	0	13.5714	16.9444	5	8	19	29	5	16	chr3	49153585	49153984	400	-	intronexonboundary:142984	uc011bcg.2	10869	USP19	hg19_genes_intronexonboundaries	55258
AR_ctr	CD4 mem	chr3	49153758	49153758	1	2	64	Open Sea	NA	NA	NA	NA	0.816576	0.733619	0.0829577	0.152585	2.73e-06	1	0.526316	0.181473	0.933333	0.464286	0.148402	0	0.00597366	1479673	0	0	13.5714	16.9444	5	8	19	29	5	16	chr3	49153585	49153984	400	-	intronexonboundary:142985	uc003cwc.2	10869	USP19	hg19_genes_intronexonboundaries	55258
AR_ctr	CD4 mem	chr3	49153758	49153758	1	2	64	Open Sea	NA	NA	NA	NA	0.816576	0.733619	0.0829577	0.152585	2.73e-06	1	0.526316	0.181473	0.933333	0.464286	0.148402	0	0.00597366	1479673	0	0	13.5714	16.9444	5	8	19	29	5	16	chr3	49153585	49153984	400	-	intronexonboundary:142986	uc003cwd.2	10869	USP19	hg19_genes_intronexonboundaries	55258
AR_ctr	CD4 mem	chr3	49153758	49153758	1	2	64	Open Sea	NA	NA	NA	NA	0.816576	0.733619	0.0829577	0.152585	2.73e-06	1	0.526316	0.181473	0.933333	0.464286	0.148402	0	0.00597366	1479673	0	0	13.5714	16.9444	5	8	19	29	5	16	chr3	49153585	49153984	400	-	intronexonboundary:142987	uc011bch.2	10869	USP19	hg19_genes_intronexonboundaries	55258
AR_ctr	CD4 mem	chr3	49153758	49153758	1	2	64	Open Sea	NA	NA	NA	NA	0.816576	0.733619	0.0829577	0.152585	2.73e-06	1	0.526316	0.181473	0.933333	0.464286	0.148402	0	0.00597366	1479673	0	0	13.5714	16.9444	5	8	19	29	5	16	chr3	49153585	49153984	400	-	intronexonboundary:142988	uc011bci.2	10869	USP19	hg19_genes_intronexonboundaries	55258
AR_ctr	CD4 mem	chr3	49153758	49153758	1	2	64	Open Sea	NA	NA	NA	NA	0.816576	0.733619	0.0829577	0.152585	2.73e-06	1	0.526316	0.181473	0.933333	0.464286	0.148402	0	0.00597366	1479673	0	0	13.5714	16.9444	5	8	19	29	5	16	chr3	49153514	49153913	400	-	exonintronboundary:145614	uc003cwa.3	10869	USP19	hg19_genes_exonintronboundaries	55258
AR_ctr	CD4 mem	chr3	49153758	49153758	1	2	64	Open Sea	NA	NA	NA	NA	0.816576	0.733619	0.0829577	0.152585	2.73e-06	1	0.526316	0.181473	0.933333	0.464286	0.148402	0	0.00597366	1479673	0	0	13.5714	16.9444	5	8	19	29	5	16	chr3	49153514	49153913	400	-	exonintronboundary:145615	uc003cvz.4	10869	USP19	hg19_genes_exonintronboundaries	55258
AR_ctr	CD4 mem	chr3	49153758	49153758	1	2	64	Open Sea	NA	NA	NA	NA	0.816576	0.733619	0.0829577	0.152585	2.73e-06	1	0.526316	0.181473	0.933333	0.464286	0.148402	0	0.00597366	1479673	0	0	13.5714	16.9444	5	8	19	29	5	16	chr3	49153514	49153913	400	-	exonintronboundary:145616	uc003cwb.3	10869	USP19	hg19_genes_exonintronboundaries	55258
AR_ctr	CD4 mem	chr3	49153758	49153758	1	2	64	Open Sea	NA	NA	NA	NA	0.816576	0.733619	0.0829577	0.152585	2.73e-06	1	0.526316	0.181473	0.933333	0.464286	0.148402	0	0.00597366	1479673	0	0	13.5714	16.9444	5	8	19	29	5	16	chr3	49153514	49153913	400	-	exonintronboundary:145617	uc011bcg.2	10869	USP19	hg19_genes_exonintronboundaries	55258
AR_ctr	CD4 mem	chr3	49153758	49153758	1	2	64	Open Sea	NA	NA	NA	NA	0.816576	0.733619	0.0829577	0.152585	2.73e-06	1	0.526316	0.181473	0.933333	0.464286	0.148402	0	0.00597366	1479673	0	0	13.5714	16.9444	5	8	19	29	5	16	chr3	49153514	49153913	400	-	exonintronboundary:145618	uc003cwc.2	10869	USP19	hg19_genes_exonintronboundaries	55258
AR_ctr	CD4 mem	chr3	49153758	49153758	1	2	64	Open Sea	NA	NA	NA	NA	0.816576	0.733619	0.0829577	0.152585	2.73e-06	1	0.526316	0.181473	0.933333	0.464286	0.148402	0	0.00597366	1479673	0	0	13.5714	16.9444	5	8	19	29	5	16	chr3	49153514	49153913	400	-	exonintronboundary:145619	uc003cwd.2	10869	USP19	hg19_genes_exonintronboundaries	55258
AR_ctr	CD4 mem	chr3	49153758	49153758	1	2	64	Open Sea	NA	NA	NA	NA	0.816576	0.733619	0.0829577	0.152585	2.73e-06	1	0.526316	0.181473	0.933333	0.464286	0.148402	0	0.00597366	1479673	0	0	13.5714	16.9444	5	8	19	29	5	16	chr3	49153514	49153913	400	-	exonintronboundary:145620	uc011bch.2	10869	USP19	hg19_genes_exonintronboundaries	55258
AR_ctr	CD4 mem	chr3	49153758	49153758	1	2	64	Open Sea	NA	NA	NA	NA	0.816576	0.733619	0.0829577	0.152585	2.73e-06	1	0.526316	0.181473	0.933333	0.464286	0.148402	0	0.00597366	1479673	0	0	13.5714	16.9444	5	8	19	29	5	16	chr3	49153514	49153913	400	-	exonintronboundary:145621	uc011bci.2	10869	USP19	hg19_genes_exonintronboundaries	55258
AR_ctr	CD4 mem	chr3	49153758	49153758	1	2	64	Open Sea	NA	NA	NA	NA	0.816576	0.733619	0.0829577	0.152585	2.73e-06	1	0.526316	0.181473	0.933333	0.464286	0.148402	0	0.00597366	1479673	0	0	13.5714	16.9444	5	8	19	29	5	16	chr3	49153685	49154084	400	-	exonintronboundary:145622	uc003cwa.3	10869	USP19	hg19_genes_exonintronboundaries	55258
AR_ctr	CD4 mem	chr3	49153758	49153758	1	2	64	Open Sea	NA	NA	NA	NA	0.816576	0.733619	0.0829577	0.152585	2.73e-06	1	0.526316	0.181473	0.933333	0.464286	0.148402	0	0.00597366	1479673	0	0	13.5714	16.9444	5	8	19	29	5	16	chr3	49153685	49154084	400	-	exonintronboundary:145623	uc003cvz.4	10869	USP19	hg19_genes_exonintronboundaries	55258
AR_ctr	CD4 mem	chr3	49153758	49153758	1	2	64	Open Sea	NA	NA	NA	NA	0.816576	0.733619	0.0829577	0.152585	2.73e-06	1	0.526316	0.181473	0.933333	0.464286	0.148402	0	0.00597366	1479673	0	0	13.5714	16.9444	5	8	19	29	5	16	chr3	49153685	49154084	400	-	exonintronboundary:145624	uc003cwb.3	10869	USP19	hg19_genes_exonintronboundaries	55258
AR_ctr	CD4 mem	chr3	49153758	49153758	1	2	64	Open Sea	NA	NA	NA	NA	0.816576	0.733619	0.0829577	0.152585	2.73e-06	1	0.526316	0.181473	0.933333	0.464286	0.148402	0	0.00597366	1479673	0	0	13.5714	16.9444	5	8	19	29	5	16	chr3	49153685	49154084	400	-	exonintronboundary:145625	uc011bcg.2	10869	USP19	hg19_genes_exonintronboundaries	55258
AR_ctr	CD4 mem	chr3	49153758	49153758	1	2	64	Open Sea	NA	NA	NA	NA	0.816576	0.733619	0.0829577	0.152585	2.73e-06	1	0.526316	0.181473	0.933333	0.464286	0.148402	0	0.00597366	1479673	0	0	13.5714	16.9444	5	8	19	29	5	16	chr3	49153685	49154084	400	-	exonintronboundary:145626	uc003cwc.2	10869	USP19	hg19_genes_exonintronboundaries	55258
AR_ctr	CD4 mem	chr3	49153758	49153758	1	2	64	Open Sea	NA	NA	NA	NA	0.816576	0.733619	0.0829577	0.152585	2.73e-06	1	0.526316	0.181473	0.933333	0.464286	0.148402	0	0.00597366	1479673	0	0	13.5714	16.9444	5	8	19	29	5	16	chr3	49153685	49154084	400	-	exonintronboundary:145627	uc003cwd.2	10869	USP19	hg19_genes_exonintronboundaries	55258
AR_ctr	CD4 mem	chr3	49153758	49153758	1	2	64	Open Sea	NA	NA	NA	NA	0.816576	0.733619	0.0829577	0.152585	2.73e-06	1	0.526316	0.181473	0.933333	0.464286	0.148402	0	0.00597366	1479673	0	0	13.5714	16.9444	5	8	19	29	5	16	chr3	49153685	49154084	400	-	exonintronboundary:145628	uc011bch.2	10869	USP19	hg19_genes_exonintronboundaries	55258
AR_ctr	CD4 mem	chr3	49153758	49153758	1	2	64	Open Sea	NA	NA	NA	NA	0.816576	0.733619	0.0829577	0.152585	2.73e-06	1	0.526316	0.181473	0.933333	0.464286	0.148402	0	0.00597366	1479673	0	0	13.5714	16.9444	5	8	19	29	5	16	chr3	49153685	49154084	400	-	exonintronboundary:145629	uc011bci.2	10869	USP19	hg19_genes_exonintronboundaries	55258
AR_ctr	CD4 mem	chr3	49153758	49153758	1	2	64	Open Sea	NA	NA	NA	NA	0.816576	0.733619	0.0829577	0.152585	2.73e-06	1	0.526316	0.181473	0.933333	0.464286	0.148402	0	0.00597366	1479673	0	0	13.5714	16.9444	5	8	19	29	5	16	chr3	49146374	49153768	7395	*	inter:3470	NA	NA	NA	hg19_cpg_inter	55258
AR_ctr	CD4 mem	chr6	153129806	153129806	1	7	52	Open Sea	NA	NA	NA	NA	0.91102	0.863633	0.0473878	0.0762065	2.74e-06	1	0.8	0.0723263	0.960784	0.636364	0.0799738	0	0.00599333	2096206	0	0	18	22.3889	8	5	25	51	6	17	chr6	153080903	153291657	210755	*	intergenic:5985	NA	NA	NA	hg19_genes_intergenic	57873
AR_ctr	CD4 mem	chr6	153129806	153129806	1	7	52	Open Sea	NA	NA	NA	NA	0.91102	0.863633	0.0473878	0.0762065	2.74e-06	1	0.8	0.0723263	0.960784	0.636364	0.0799738	0	0.00599333	2096206	0	0	18	22.3889	8	5	25	51	6	17	chr6	152962473	153299408	336936	*	inter:6589	NA	NA	NA	hg19_cpg_inter	57873
AR_ctr	CD4 mem	chr16	86027187	86027187	1	2	48	Open Sea	NA	NA	NA	NA	0.762132	0.656646	0.105486	0.211927	2.79e-06	1	0.333333	0.230679	0.933333	0	0.234541	0	0.0060936	1214402	0	0	12.4286	13.2778	6	3	21	29	5	13	chr16	85956212	86315036	358825	*	intergenic:12537	NA	NA	NA	hg19_genes_intergenic	90868
AR_ctr	CD4 mem	chr16	86027187	86027187	1	2	48	Open Sea	NA	NA	NA	NA	0.762132	0.656646	0.105486	0.211927	2.79e-06	1	0.333333	0.230679	0.933333	0	0.234541	0	0.0060936	1214402	0	0	12.4286	13.2778	6	3	21	29	5	13	chr16	86011688	86316175	304488	*	inter:14755	NA	NA	NA	hg19_cpg_inter	90868
AR_ctr	CD4 mem	chr9	132096659	132096659	1	3	64	Open Sea	NA	NA	NA	NA	0.124093	0.281712	-0.157619	-1.12131	2.8e-06	0.372549	0	0.12882	0.475	0.0714286	0.0989985	0	0.00610836	327764	0	0	27.1429	24.3333	4	5	51	40	6	16	chr9	132093803	132097802	4000	+	1to5kb:35540	uc004bxt.1	NA	NA	hg19_genes_1to5kb	2142
AR_ctr	CD4 mem	chr9	132096659	132096659	1	3	64	Open Sea	NA	NA	NA	NA	0.124093	0.281712	-0.157619	-1.12131	2.8e-06	0.372549	0	0.12882	0.475	0.0714286	0.0989985	0	0.00610836	327764	0	0	27.1429	24.3333	4	5	51	40	6	16	chr9	132095124	132097123	2000	*	shelf:19500	NA	NA	NA	hg19_cpg_shelves	2142
AR_ctr	CD4 mem	chr12	48370896	48370896	1	1	64	Open Sea	NA	NA	NA	NA	0.651867	0.702378	-0.0505106	-0.106101	2.82e-06	1	0.347826	0.260508	1	0.357143	0.168912	0	0.00614908	1803336	0	1	14.4286	15.1667	3	0	27	40	5	11	chr12	48370397	48374396	4000	-	1to5kb:48079	uc001rqt.3	1280	COL2A1	hg19_genes_1to5kb	13565
AR_ctr	CD4 mem	chr12	48370896	48370896	1	1	64	Open Sea	NA	NA	NA	NA	0.651867	0.702378	-0.0505106	-0.106101	2.82e-06	1	0.347826	0.260508	1	0.357143	0.168912	0	0.00614908	1803336	0	1	14.4286	15.1667	3	0	27	40	5	11	chr12	48370885	48370938	54	-	CDS:355937	uc001rqu.3	1280	COL2A1	hg19_genes_cds	13565
AR_ctr	CD4 mem	chr12	48370896	48370896	1	1	64	Open Sea	NA	NA	NA	NA	0.651867	0.702378	-0.0505106	-0.106101	2.82e-06	1	0.347826	0.260508	1	0.357143	0.168912	0	0.00614908	1803336	0	1	14.4286	15.1667	3	0	27	40	5	11	chr12	48370885	48370938	54	-	CDS:355990	uc001rqv.3	1280	COL2A1	hg19_genes_cds	13565
AR_ctr	CD4 mem	chr12	48370896	48370896	1	1	64	Open Sea	NA	NA	NA	NA	0.651867	0.702378	-0.0505106	-0.106101	2.82e-06	1	0.347826	0.260508	1	0.357143	0.168912	0	0.00614908	1803336	0	1	14.4286	15.1667	3	0	27	40	5	11	chr12	48370885	48370938	54	-	exon:441386	uc009zkw.3	1280	COL2A1	hg19_genes_exons	13565
AR_ctr	CD4 mem	chr12	48370896	48370896	1	1	64	Open Sea	NA	NA	NA	NA	0.651867	0.702378	-0.0505106	-0.106101	2.82e-06	1	0.347826	0.260508	1	0.357143	0.168912	0	0.00614908	1803336	0	1	14.4286	15.1667	3	0	27	40	5	11	chr12	48370885	48370938	54	-	exon:441440	uc001rqu.3	1280	COL2A1	hg19_genes_exons	13565
AR_ctr	CD4 mem	chr12	48370896	48370896	1	1	64	Open Sea	NA	NA	NA	NA	0.651867	0.702378	-0.0505106	-0.106101	2.82e-06	1	0.347826	0.260508	1	0.357143	0.168912	0	0.00614908	1803336	0	1	14.4286	15.1667	3	0	27	40	5	11	chr12	48370885	48370938	54	-	exon:441493	uc001rqv.3	1280	COL2A1	hg19_genes_exons	13565
AR_ctr	CD4 mem	chr12	48370896	48370896	1	1	64	Open Sea	NA	NA	NA	NA	0.651867	0.702378	-0.0505106	-0.106101	2.82e-06	1	0.347826	0.260508	1	0.357143	0.168912	0	0.00614908	1803336	0	1	14.4286	15.1667	3	0	27	40	5	11	chr12	48370503	48370902	400	-	intronexonboundary:410801	uc009zkw.3	1280	COL2A1	hg19_genes_intronexonboundaries	13565
AR_ctr	CD4 mem	chr12	48370896	48370896	1	1	64	Open Sea	NA	NA	NA	NA	0.651867	0.702378	-0.0505106	-0.106101	2.82e-06	1	0.347826	0.260508	1	0.357143	0.168912	0	0.00614908	1803336	0	1	14.4286	15.1667	3	0	27	40	5	11	chr12	48370503	48370902	400	-	intronexonboundary:410802	uc001rqu.3	1280	COL2A1	hg19_genes_intronexonboundaries	13565
AR_ctr	CD4 mem	chr12	48370896	48370896	1	1	64	Open Sea	NA	NA	NA	NA	0.651867	0.702378	-0.0505106	-0.106101	2.82e-06	1	0.347826	0.260508	1	0.357143	0.168912	0	0.00614908	1803336	0	1	14.4286	15.1667	3	0	27	40	5	11	chr12	48370503	48370902	400	-	intronexonboundary:410803	uc001rqv.3	1280	COL2A1	hg19_genes_intronexonboundaries	13565
AR_ctr	CD4 mem	chr12	48370896	48370896	1	1	64	Open Sea	NA	NA	NA	NA	0.651867	0.702378	-0.0505106	-0.106101	2.82e-06	1	0.347826	0.260508	1	0.357143	0.168912	0	0.00614908	1803336	0	1	14.4286	15.1667	3	0	27	40	5	11	chr12	48370739	48371138	400	-	intronexonboundary:410804	uc009zkw.3	1280	COL2A1	hg19_genes_intronexonboundaries	13565
AR_ctr	CD4 mem	chr12	48370896	48370896	1	1	64	Open Sea	NA	NA	NA	NA	0.651867	0.702378	-0.0505106	-0.106101	2.82e-06	1	0.347826	0.260508	1	0.357143	0.168912	0	0.00614908	1803336	0	1	14.4286	15.1667	3	0	27	40	5	11	chr12	48370739	48371138	400	-	intronexonboundary:410805	uc001rqu.3	1280	COL2A1	hg19_genes_intronexonboundaries	13565
AR_ctr	CD4 mem	chr12	48370896	48370896	1	1	64	Open Sea	NA	NA	NA	NA	0.651867	0.702378	-0.0505106	-0.106101	2.82e-06	1	0.347826	0.260508	1	0.357143	0.168912	0	0.00614908	1803336	0	1	14.4286	15.1667	3	0	27	40	5	11	chr12	48370739	48371138	400	-	intronexonboundary:410806	uc001rqv.3	1280	COL2A1	hg19_genes_intronexonboundaries	13565
AR_ctr	CD4 mem	chr12	48370896	48370896	1	1	64	Open Sea	NA	NA	NA	NA	0.651867	0.702378	-0.0505106	-0.106101	2.82e-06	1	0.347826	0.260508	1	0.357143	0.168912	0	0.00614908	1803336	0	1	14.4286	15.1667	3	0	27	40	5	11	chr12	48370686	48371085	400	-	exonintronboundary:414437	uc009zkw.3	1280	COL2A1	hg19_genes_exonintronboundaries	13565
AR_ctr	CD4 mem	chr12	48370896	48370896	1	1	64	Open Sea	NA	NA	NA	NA	0.651867	0.702378	-0.0505106	-0.106101	2.82e-06	1	0.347826	0.260508	1	0.357143	0.168912	0	0.00614908	1803336	0	1	14.4286	15.1667	3	0	27	40	5	11	chr12	48370686	48371085	400	-	exonintronboundary:414438	uc001rqu.3	1280	COL2A1	hg19_genes_exonintronboundaries	13565
AR_ctr	CD4 mem	chr12	48370896	48370896	1	1	64	Open Sea	NA	NA	NA	NA	0.651867	0.702378	-0.0505106	-0.106101	2.82e-06	1	0.347826	0.260508	1	0.357143	0.168912	0	0.00614908	1803336	0	1	14.4286	15.1667	3	0	27	40	5	11	chr12	48370686	48371085	400	-	exonintronboundary:414439	uc001rqv.3	1280	COL2A1	hg19_genes_exonintronboundaries	13565
AR_ctr	CD4 mem	chr12	48370896	48370896	1	1	64	Open Sea	NA	NA	NA	NA	0.651867	0.702378	-0.0505106	-0.106101	2.82e-06	1	0.347826	0.260508	1	0.357143	0.168912	0	0.00614908	1803336	0	1	14.4286	15.1667	3	0	27	40	5	11	chr12	48361508	48391368	29861	*	inter:11629	NA	NA	NA	hg19_cpg_inter	13565
AR_ctr	CD4 mem	chr13	114019180	114019180	1	5	50	Island	NA	NA	NA	NA	0.792022	0.674191	0.117831	0.229242	2.94e-06	1	0.529412	0.189879	0.857143	0.5	0.0895143	0	0.00640762	1155659	0	0	12.2857	21.0556	3	7	24	42	5	16	chr13	114018464	114019463	1000	-	promoter:50673	uc001vtn.3	79774	GRTP1	hg19_genes_promoters	67710
AR_ctr	CD4 mem	chr13	114019180	114019180	1	5	50	Island	NA	NA	NA	NA	0.792022	0.674191	0.117831	0.229242	2.94e-06	1	0.529412	0.189879	0.857143	0.5	0.0895143	0	0.00640762	1155659	0	0	12.2857	21.0556	3	7	24	42	5	16	chr13	114018464	114019463	1000	-	promoter:50675	uc010tkc.2	79774	GRTP1	hg19_genes_promoters	67710
AR_ctr	CD4 mem	chr13	114019180	114019180	1	5	50	Island	NA	NA	NA	NA	0.792022	0.674191	0.117831	0.229242	2.94e-06	1	0.529412	0.189879	0.857143	0.5	0.0895143	0	0.00640762	1155659	0	0	12.2857	21.0556	3	7	24	42	5	16	chr13	114018464	114019463	1000	-	promoter:50676	uc010agv.1	79774	GRTP1	hg19_genes_promoters	67710
AR_ctr	CD4 mem	chr13	114019180	114019180	1	5	50	Island	NA	NA	NA	NA	0.792022	0.674191	0.117831	0.229242	2.94e-06	1	0.529412	0.189879	0.857143	0.5	0.0895143	0	0.00640762	1155659	0	0	12.2857	21.0556	3	7	24	42	5	16	chr13	114018790	114019685	896	*	island:16923	NA	NA	NA	hg19_cpg_islands	67710
AR_ctr	CD4 mem	chr3	45092395	45092395	1	2	47	Open Sea	NA	NA	NA	NA	0.978035	0.94557	0.0324649	0.0482004	3.02e-06	1	0.936709	0.0226885	0.989899	0.915493	0.0207911	0	0.00654847	2474871	0	0	68.7143	80.7778	19	33	106	134	7	18	chr3	45077564	45123768	46205	*	intergenic:2954	NA	NA	NA	hg19_genes_intergenic	24635
AR_ctr	CD4 mem	chr3	45092395	45092395	1	2	47	Open Sea	NA	NA	NA	NA	0.978035	0.94557	0.0324649	0.0482004	3.02e-06	1	0.936709	0.0226885	0.989899	0.915493	0.0207911	0	0.00654847	2474871	0	0	68.7143	80.7778	19	33	106	134	7	18	chr3	45081691	45183026	101336	*	inter:3414	NA	NA	NA	hg19_cpg_inter	24635
AR_ctr	CD4 mem	chr7	25133529	25133529	1	7	54	Open Sea	NA	NA	NA	NA	0.849611	0.74277	0.106841	0.191475	3.06e-06	1	0.705882	0.112785	0.9	0.5	0.130287	0	0.006628	1292767	0	0	14.1429	14.8889	7	6	21	24	5	15	chr7	25024761	25158269	133509	*	intergenic:6186	NA	NA	NA	hg19_genes_intergenic	170744
AR_ctr	CD4 mem	chr7	25133529	25133529	1	7	54	Open Sea	NA	NA	NA	NA	0.849611	0.74277	0.106841	0.191475	3.06e-06	1	0.705882	0.112785	0.9	0.5	0.130287	0	0.006628	1292767	0	0	14.1429	14.8889	7	6	21	24	5	15	chr7	25025521	25160548	135028	*	inter:6989	NA	NA	NA	hg19_cpg_inter	170744
AR_ctr	CD4 mem	chr19	16779937	16779937	1	3	48	Open Sea	NA	NA	NA	NA	0.877814	0.838273	0.0395401	0.0657274	3.07e-06	1	0.64	0.121093	0.969697	0.652174	0.0801355	0	0.00663767	2223676	0	0	31.7143	37.1667	12	14	49	66	7	18	chr19	16772153	16790794	18642	+	intron:541062	uc002nes.3	79041	TMEM38A	hg19_genes_introns	7998
AR_ctr	CD4 mem	chr19	16779937	16779937	1	3	48	Open Sea	NA	NA	NA	NA	0.877814	0.838273	0.0395401	0.0657274	3.07e-06	1	0.64	0.121093	0.969697	0.652174	0.0801355	0	0.00663767	2223676	0	0	31.7143	37.1667	12	14	49	66	7	18	chr19	16776633	16914458	137826	*	inter:16880	NA	NA	NA	hg19_cpg_inter	7998
AR_ctr	CD4 mem	chr15	35304447	35304447	1	2	47	Open Sea	NA	NA	NA	NA	0.915697	0.82314	0.0925568	0.151981	3.08e-06	1	0.769231	0.0891671	0.979167	0.517241	0.143755	0	0.0066564	1482954	0	0	31.5714	38.2778	11	3	51	91	7	17	chr15	35285498	35524526	239029	*	intergenic:11592	NA	NA	NA	hg19_genes_intergenic	33756
AR_ctr	CD4 mem	chr15	35304447	35304447	1	2	47	Open Sea	NA	NA	NA	NA	0.915697	0.82314	0.0925568	0.151981	3.08e-06	1	0.769231	0.0891671	0.979167	0.517241	0.143755	0	0.0066564	1482954	0	0	31.5714	38.2778	11	3	51	91	7	17	chr15	35284838	35381071	96234	*	inter:13443	NA	NA	NA	hg19_cpg_inter	33756
AR_ctr	CD4 mem	chr9	137371652	137371652	1	1	50	Open Sea	NA	NA	NA	NA	0.899603	0.910379	-0.0107755	-0.0169903	3.09e-06	1	0.638889	0.127055	1	0.666667	0.080502	0	0.00667848	3061174	0	0	23.1429	22.4444	8	3	36	41	6	17	chr9	137332432	137528650	196219	*	intergenic:8161	NA	NA	NA	hg19_genes_intergenic	62647
AR_ctr	CD4 mem	chr9	137371652	137371652	1	1	50	Open Sea	NA	NA	NA	NA	0.899603	0.910379	-0.0107755	-0.0169903	3.09e-06	1	0.638889	0.127055	1	0.666667	0.080502	0	0.00667848	3061174	0	0	23.1429	22.4444	8	3	36	41	6	17	chr9	137362803	137389048	26246	*	inter:9401	NA	NA	NA	hg19_cpg_inter	62647
AR_ctr	CD4 mem	chr1	6582128	6582128	1	4	55	Open Sea	NA	NA	NA	NA	0.958765	0.934097	0.024668	0.0372116	3.09e-06	1	0.888889	0.0409136	0.978723	0.777778	0.0478332	0	0.00668082	2656765	0	0	40.5714	43.0556	13	9	55	74	7	17	chr1	6581122	6585121	4000	-	1to5kb:4334	uc001anp.2	57449	PLEKHG5	hg19_genes_1to5kb	33208
AR_ctr	CD4 mem	chr1	6582128	6582128	1	4	55	Open Sea	NA	NA	NA	NA	0.958765	0.934097	0.024668	0.0372116	3.09e-06	1	0.888889	0.0409136	0.978723	0.777778	0.0478332	0	0.00668082	2656765	0	0	40.5714	43.0556	13	9	55	74	7	17	chr1	6581122	6585121	4000	-	1to5kb:4335	uc001anq.2	57449	PLEKHG5	hg19_genes_1to5kb	33208
AR_ctr	CD4 mem	chr1	6582128	6582128	1	4	55	Open Sea	NA	NA	NA	NA	0.958765	0.934097	0.024668	0.0372116	3.09e-06	1	0.888889	0.0409136	0.978723	0.777778	0.0478332	0	0.00668082	2656765	0	0	40.5714	43.0556	13	9	55	74	7	17	chr1	6581407	6586063	4657	-	exon:40166	uc001ans.3	79707	NOL9	hg19_genes_exons	33208
AR_ctr	CD4 mem	chr1	6582128	6582128	1	4	55	Open Sea	NA	NA	NA	NA	0.958765	0.934097	0.024668	0.0372116	3.09e-06	1	0.888889	0.0409136	0.978723	0.777778	0.0478332	0	0.00668082	2656765	0	0	40.5714	43.0556	13	9	55	74	7	17	chr1	6581407	6586063	4657	-	exon:40178	uc010nzs.2	79707	NOL9	hg19_genes_exons	33208
AR_ctr	CD4 mem	chr1	6582128	6582128	1	4	55	Open Sea	NA	NA	NA	NA	0.958765	0.934097	0.024668	0.0372116	3.09e-06	1	0.888889	0.0409136	0.978723	0.777778	0.0478332	0	0.00668082	2656765	0	0	40.5714	43.0556	13	9	55	74	7	17	chr1	6581407	6585913	4507	-	3UTR:3460	uc001ans.3	79707	NOL9	hg19_genes_3UTRs	33208
AR_ctr	CD4 mem	chr1	6582128	6582128	1	4	55	Open Sea	NA	NA	NA	NA	0.958765	0.934097	0.024668	0.0372116	3.09e-06	1	0.888889	0.0409136	0.978723	0.777778	0.0478332	0	0.00668082	2656765	0	0	40.5714	43.0556	13	9	55	74	7	17	chr1	6561873	6610136	48264	*	inter:153	NA	NA	NA	hg19_cpg_inter	33208
AR_ctr	CD4 mem	chr7	75916667	75916667	1	3	64	Open Sea	NA	NA	NA	NA	0.844488	0.823739	0.0207488	0.0354641	3.11e-06	1	0.615385	0.146932	0.958333	0.702128	0.0827016	0	0.0067129	2689115	0	0	25.1429	36.4444	7	14	45	71	6	18	chr7	75916405	75916804	400	+	exonintronboundary:251348	uc010ldi.2	222183	SRRM3	hg19_genes_exonintronboundaries	2291
AR_ctr	CD4 mem	chr7	75916667	75916667	1	3	64	Open Sea	NA	NA	NA	NA	0.844488	0.823739	0.0207488	0.0354641	3.11e-06	1	0.615385	0.146932	0.958333	0.702128	0.0827016	0	0.0067129	2689115	0	0	25.1429	36.4444	7	14	45	71	6	18	chr7	75916405	75916804	400	+	exonintronboundary:251349	uc003uet.1	222183	SRRM3	hg19_genes_exonintronboundaries	2291
AR_ctr	CD4 mem	chr7	75916667	75916667	1	3	64	Open Sea	NA	NA	NA	NA	0.844488	0.823739	0.0207488	0.0354641	3.11e-06	1	0.615385	0.146932	0.958333	0.702128	0.0827016	0	0.0067129	2689115	0	0	25.1429	36.4444	7	14	45	71	6	18	chr7	75916418	75916817	400	+	exonintronboundary:251350	uc022agm.2	NA	NA	hg19_genes_exonintronboundaries	2291
AR_ctr	CD4 mem	chr7	75916667	75916667	1	3	64	Open Sea	NA	NA	NA	NA	0.844488	0.823739	0.0207488	0.0354641	3.11e-06	1	0.615385	0.146932	0.958333	0.702128	0.0827016	0	0.0067129	2689115	0	0	25.1429	36.4444	7	14	45	71	6	18	chr7	75916619	75926874	10256	*	intergenic:6431	NA	NA	NA	hg19_genes_intergenic	2291
AR_ctr	CD4 mem	chr7	75916667	75916667	1	3	64	Open Sea	NA	NA	NA	NA	0.844488	0.823739	0.0207488	0.0354641	3.11e-06	1	0.615385	0.146932	0.958333	0.702128	0.0827016	0	0.0067129	2689115	0	0	25.1429	36.4444	7	14	45	71	6	18	chr7	75916497	75927704	11208	*	inter:7314	NA	NA	NA	hg19_cpg_inter	2291
AR_ctr	CD4 mem	chr9	130478527	130478527	1	5	69	Open Sea	NA	NA	NA	NA	0.872981	0.726364	0.146616	0.261962	3.13e-06	1	0.755556	0.0959729	0.852941	0.428571	0.107366	0	0.00673942	1055610	0	0	33.8571	29.1111	1	7	51	78	6	16	chr9	130478269	130479268	1000	+	promoter:35419	uc004brr.1	158248	TTC16	hg19_genes_promoters	168
AR_ctr	CD4 mem	chr9	130478527	130478527	1	5	69	Open Sea	NA	NA	NA	NA	0.872981	0.726364	0.146616	0.261962	3.13e-06	1	0.755556	0.0959729	0.852941	0.428571	0.107366	0	0.00673942	1055610	0	0	33.8571	29.1111	1	7	51	78	6	16	chr9	130477925	130478924	1000	-	promoter:37162	uc004brm.3	NA	NA	hg19_genes_promoters	168
AR_ctr	CD4 mem	chr9	130478527	130478527	1	5	69	Open Sea	NA	NA	NA	NA	0.872981	0.726364	0.146616	0.261962	3.13e-06	1	0.755556	0.0959729	0.852941	0.428571	0.107366	0	0.00673942	1055610	0	0	33.8571	29.1111	1	7	51	78	6	16	chr9	130477545	130481544	4000	+	1to5kb:35420	uc010mxn.1	158248	TTC16	hg19_genes_1to5kb	168
AR_ctr	CD4 mem	chr9	130478527	130478527	1	5	69	Open Sea	NA	NA	NA	NA	0.872981	0.726364	0.146616	0.261962	3.13e-06	1	0.755556	0.0959729	0.852941	0.428571	0.107366	0	0.00673942	1055610	0	0	33.8571	29.1111	1	7	51	78	6	16	chr9	130477919	130479238	1320	-	5UTR:51710	uc004bro.3	138428	PTRH1	hg19_genes_5UTRs	168
AR_ctr	CD4 mem	chr9	130478527	130478527	1	5	69	Open Sea	NA	NA	NA	NA	0.872981	0.726364	0.146616	0.261962	3.13e-06	1	0.755556	0.0959729	0.852941	0.428571	0.107366	0	0.00673942	1055610	0	0	33.8571	29.1111	1	7	51	78	6	16	chr9	130477958	130479238	1281	-	5UTR:51711	uc010mxm.3	138428	PTRH1	hg19_genes_5UTRs	168
AR_ctr	CD4 mem	chr9	130478527	130478527	1	5	69	Open Sea	NA	NA	NA	NA	0.872981	0.726364	0.146616	0.261962	3.13e-06	1	0.755556	0.0959729	0.852941	0.428571	0.107366	0	0.00673942	1055610	0	0	33.8571	29.1111	1	7	51	78	6	16	chr9	130477919	130479238	1320	-	5UTR:51713	uc011mah.2	138428	PTRH1	hg19_genes_5UTRs	168
AR_ctr	CD4 mem	chr9	130478527	130478527	1	5	69	Open Sea	NA	NA	NA	NA	0.872981	0.726364	0.146616	0.261962	3.13e-06	1	0.755556	0.0959729	0.852941	0.428571	0.107366	0	0.00673942	1055610	0	0	33.8571	29.1111	1	7	51	78	6	16	chr9	130477823	130479238	1416	-	exon:341980	uc004bro.3	138428	PTRH1	hg19_genes_exons	168
AR_ctr	CD4 mem	chr9	130478527	130478527	1	5	69	Open Sea	NA	NA	NA	NA	0.872981	0.726364	0.146616	0.261962	3.13e-06	1	0.755556	0.0959729	0.852941	0.428571	0.107366	0	0.00673942	1055610	0	0	33.8571	29.1111	1	7	51	78	6	16	chr9	130477823	130479238	1416	-	exon:341985	uc010mxm.3	138428	PTRH1	hg19_genes_exons	168
AR_ctr	CD4 mem	chr9	130478527	130478527	1	5	69	Open Sea	NA	NA	NA	NA	0.872981	0.726364	0.146616	0.261962	3.13e-06	1	0.755556	0.0959729	0.852941	0.428571	0.107366	0	0.00673942	1055610	0	0	33.8571	29.1111	1	7	51	78	6	16	chr9	130477823	130479238	1416	-	exon:341990	uc011mah.2	138428	PTRH1	hg19_genes_exons	168
AR_ctr	CD4 mem	chr9	130478527	130478527	1	5	69	Open Sea	NA	NA	NA	NA	0.872981	0.726364	0.146616	0.261962	3.13e-06	1	0.755556	0.0959729	0.852941	0.428571	0.107366	0	0.00673942	1055610	0	0	33.8571	29.1111	1	7	51	78	6	16	chr9	130477823	130479238	1416	-	firstexon:37163	uc004bro.3	138428	PTRH1	hg19_genes_firstexons	168
AR_ctr	CD4 mem	chr9	130478527	130478527	1	5	69	Open Sea	NA	NA	NA	NA	0.872981	0.726364	0.146616	0.261962	3.13e-06	1	0.755556	0.0959729	0.852941	0.428571	0.107366	0	0.00673942	1055610	0	0	33.8571	29.1111	1	7	51	78	6	16	chr9	130477823	130479238	1416	-	firstexon:37164	uc010mxm.3	138428	PTRH1	hg19_genes_firstexons	168
AR_ctr	CD4 mem	chr9	130478527	130478527	1	5	69	Open Sea	NA	NA	NA	NA	0.872981	0.726364	0.146616	0.261962	3.13e-06	1	0.755556	0.0959729	0.852941	0.428571	0.107366	0	0.00673942	1055610	0	0	33.8571	29.1111	1	7	51	78	6	16	chr9	130478443	130479122	680	+	intron:290785	uc004brq.1	158248	TTC16	hg19_genes_introns	168
AR_ctr	CD4 mem	chr9	130478527	130478527	1	5	69	Open Sea	NA	NA	NA	NA	0.872981	0.726364	0.146616	0.261962	3.13e-06	1	0.755556	0.0959729	0.852941	0.428571	0.107366	0	0.00673942	1055610	0	0	33.8571	29.1111	1	7	51	78	6	16	chr9	130478443	130479122	680	+	intron:290798	uc011mai.1	158248	TTC16	hg19_genes_introns	168
AR_ctr	CD4 mem	chr9	130478527	130478527	1	5	69	Open Sea	NA	NA	NA	NA	0.872981	0.726364	0.146616	0.261962	3.13e-06	1	0.755556	0.0959729	0.852941	0.428571	0.107366	0	0.00673942	1055610	0	0	33.8571	29.1111	1	7	51	78	6	16	chr9	130478242	130478641	400	+	exonintronboundary:306583	uc004brq.1	158248	TTC16	hg19_genes_exonintronboundaries	168
AR_ctr	CD4 mem	chr9	130478527	130478527	1	5	69	Open Sea	NA	NA	NA	NA	0.872981	0.726364	0.146616	0.261962	3.13e-06	1	0.755556	0.0959729	0.852941	0.428571	0.107366	0	0.00673942	1055610	0	0	33.8571	29.1111	1	7	51	78	6	16	chr9	130478242	130478641	400	+	exonintronboundary:306584	uc011mai.1	158248	TTC16	hg19_genes_exonintronboundaries	168
AR_ctr	CD4 mem	chr9	130478527	130478527	1	5	69	Open Sea	NA	NA	NA	NA	0.872981	0.726364	0.146616	0.261962	3.13e-06	1	0.755556	0.0959729	0.852941	0.428571	0.107366	0	0.00673942	1055610	0	0	33.8571	29.1111	1	7	51	78	6	16	chr9	130478147	130480146	2000	*	shore:22383	NA	NA	NA	hg19_cpg_shores	168
AR_ctr	CD4 mem	chr7	128165920	128165920	1	1	44	Open Sea	NA	NA	NA	NA	0.863426	0.874594	-0.0111681	-0.0183301	3.14e-06	1	0.722222	0.117662	1	0.535714	0.113699	0	0.00676812	3032454	0	0	19.5714	21.8333	4	3	27	46	6	17	chr7	128142979	128276294	133316	*	intergenic:6660	NA	NA	NA	hg19_genes_intergenic	48808
AR_ctr	CD4 mem	chr7	128165920	128165920	1	1	44	Open Sea	NA	NA	NA	NA	0.863426	0.874594	-0.0111681	-0.0183301	3.14e-06	1	0.722222	0.117662	1	0.535714	0.113699	0	0.00676812	3032454	0	0	19.5714	21.8333	4	3	27	46	6	17	chr7	128121313	128166734	45422	*	inter:7568	NA	NA	NA	hg19_cpg_inter	48808
AR_ctr	CD4 mem	chr20	2667918	2667918	1	1	42	Open Sea	NA	NA	NA	NA	0.927381	0.897854	0.0295267	0.0461748	3.15e-06	1	0.816667	0.0808986	0.978723	0.787234	0.0507599	0	0.00679161	2505005	0	0	52	59.8333	30	36	61	86	7	18	chr20	2649866	2668523	18658	*	intergenic:14601	NA	NA	NA	hg19_genes_intergenic	5604
AR_ctr	CD4 mem	chr20	2667918	2667918	1	1	42	Open Sea	NA	NA	NA	NA	0.927381	0.897854	0.0295267	0.0461748	3.15e-06	1	0.816667	0.0808986	0.978723	0.787234	0.0507599	0	0.00679161	2505005	0	0	52	59.8333	30	36	61	86	7	18	chr20	2648902	2668904	20003	*	inter:17771	NA	NA	NA	hg19_cpg_inter	5604
AR_ctr	CD4 mem	chr2	1287088	1287088	1	3	68	Open Sea	NA	NA	NA	NA	0.807579	0.732117	0.0754622	0.139712	3.18e-06	1	0.571429	0.171219	0.96	0.512821	0.116538	0	0.00684844	1558527	0	0	22.5714	37.7778	4	10	43	90	6	18	chr2	1271344	1312265	40922	+	intron:65024	uc002qwq.3	54221	SNTG2	hg19_genes_introns	90905
AR_ctr	CD4 mem	chr2	1287088	1287088	1	3	68	Open Sea	NA	NA	NA	NA	0.807579	0.732117	0.0754622	0.139712	3.18e-06	1	0.571429	0.171219	0.96	0.512821	0.116538	0	0.00684844	1558527	0	0	22.5714	37.7778	4	10	43	90	6	18	chr2	1271344	1312265	40922	+	intron:65034	uc010ewi.3	54221	SNTG2	hg19_genes_introns	90905
AR_ctr	CD4 mem	chr2	1287088	1287088	1	3	68	Open Sea	NA	NA	NA	NA	0.807579	0.732117	0.0754622	0.139712	3.18e-06	1	0.571429	0.171219	0.96	0.512821	0.116538	0	0.00684844	1558527	0	0	22.5714	37.7778	4	10	43	90	6	18	chr2	1286643	1288642	2000	*	shore:4605	NA	NA	NA	hg19_cpg_shores	90905
AR_ctr	CD4 mem	chr1	6559451	6559451	1	1	62	Open Sea	NA	NA	NA	NA	0.907988	0.892346	0.0156422	0.0247949	3.2e-06	1	0.788462	0.0812853	0.981132	0.793103	0.0544121	0	0.00688191	2895530	0	0	55.2857	61.6111	7	17	95	132	6	18	chr1	6557757	6561756	4000	-	1to5kb:4331	uc001ann.1	57449	PLEKHG5	hg19_genes_1to5kb	51347
AR_ctr	CD4 mem	chr1	6559451	6559451	1	1	62	Open Sea	NA	NA	NA	NA	0.907988	0.892346	0.0156422	0.0247949	3.2e-06	1	0.788462	0.0812853	0.981132	0.793103	0.0544121	0	0.00688191	2895530	0	0	55.2857	61.6111	7	17	95	132	6	18	chr1	6558157	6562156	4000	-	1to5kb:4332	uc031plb.1	57449	PLEKHG5	hg19_genes_1to5kb	51347
AR_ctr	CD4 mem	chr1	6559451	6559451	1	1	62	Open Sea	NA	NA	NA	NA	0.907988	0.892346	0.0156422	0.0247949	3.2e-06	1	0.788462	0.0812853	0.981132	0.793103	0.0544121	0	0.00688191	2895530	0	0	55.2857	61.6111	7	17	95	132	6	18	chr1	6558485	6562484	4000	-	1to5kb:4333	uc001ano.1	57449	PLEKHG5	hg19_genes_1to5kb	51347
AR_ctr	CD4 mem	chr1	6559451	6559451	1	1	62	Open Sea	NA	NA	NA	NA	0.907988	0.892346	0.0156422	0.0247949	3.2e-06	1	0.788462	0.0812853	0.981132	0.793103	0.0544121	0	0.00688191	2895530	0	0	55.2857	61.6111	7	17	95	132	6	18	chr1	6556630	6579504	22875	-	intron:35796	uc001anp.2	57449	PLEKHG5	hg19_genes_introns	51347
AR_ctr	CD4 mem	chr1	6559451	6559451	1	1	62	Open Sea	NA	NA	NA	NA	0.907988	0.892346	0.0156422	0.0247949	3.2e-06	1	0.788462	0.0812853	0.981132	0.793103	0.0544121	0	0.00688191	2895530	0	0	55.2857	61.6111	7	17	95	132	6	18	chr1	6556630	6579504	22875	-	intron:35817	uc001anq.2	57449	PLEKHG5	hg19_genes_introns	51347
AR_ctr	CD4 mem	chr1	6559451	6559451	1	1	62	Open Sea	NA	NA	NA	NA	0.907988	0.892346	0.0156422	0.0247949	3.2e-06	1	0.788462	0.0812853	0.981132	0.793103	0.0544121	0	0.00688191	2895530	0	0	55.2857	61.6111	7	17	95	132	6	18	chr1	6557873	6559872	2000	*	shore:568	NA	NA	NA	hg19_cpg_shores	51347
AR_ctr	CD4 mem	chr12	124816558	124816558	1	3	62	Open Sea	NA	NA	NA	NA	0.870955	0.6898	0.181155	0.332125	3.21e-06	1	0.730769	0.103556	1	0.125	0.214988	0	0.00688998	901534	0	0	19.1429	18.0556	1	3	31	34	6	13	chr12	124815445	124816864	1420	-	intron:404274	uc010tax.2	9612	NCOR2	hg19_genes_introns	36488
AR_ctr	CD4 mem	chr12	124816558	124816558	1	3	62	Open Sea	NA	NA	NA	NA	0.870955	0.6898	0.181155	0.332125	3.21e-06	1	0.730769	0.103556	1	0.125	0.214988	0	0.00688998	901534	0	0	19.1429	18.0556	1	3	31	34	6	13	chr12	124815445	124816864	1420	-	intron:404284	uc010tbb.2	9612	NCOR2	hg19_genes_introns	36488
AR_ctr	CD4 mem	chr12	124816558	124816558	1	3	62	Open Sea	NA	NA	NA	NA	0.870955	0.6898	0.181155	0.332125	3.21e-06	1	0.730769	0.103556	1	0.125	0.214988	0	0.00688998	901534	0	0	19.1429	18.0556	1	3	31	34	6	13	chr12	124815445	124816864	1420	-	intron:404332	uc010tbc.2	9612	NCOR2	hg19_genes_introns	36488
AR_ctr	CD4 mem	chr12	124816558	124816558	1	3	62	Open Sea	NA	NA	NA	NA	0.870955	0.6898	0.181155	0.332125	3.21e-06	1	0.730769	0.103556	1	0.125	0.214988	0	0.00688998	901534	0	0	19.1429	18.0556	1	3	31	34	6	13	chr12	124815445	124816864	1420	-	intron:404379	uc021rgc.1	9612	NCOR2	hg19_genes_introns	36488
AR_ctr	CD4 mem	chr12	124816558	124816558	1	3	62	Open Sea	NA	NA	NA	NA	0.870955	0.6898	0.181155	0.332125	3.21e-06	1	0.730769	0.103556	1	0.125	0.214988	0	0.00688998	901534	0	0	19.1429	18.0556	1	3	31	34	6	13	chr12	124814978	124817019	2042	*	inter:12161	NA	NA	NA	hg19_cpg_inter	36488
AR_ctr	CD4 mem	chr12	111459870	111459870	1	3	48	Open Sea	NA	NA	NA	NA	0.913819	0.849157	0.0646616	0.104688	3.23e-06	1	0.8	0.0775003	0.933333	0.666667	0.0759181	0	0.00693752	1817635	0	0	14	18.6667	1	3	20	37	6	17	chr12	111375251	111466827	91577	*	intergenic:10473	NA	NA	NA	hg19_genes_intergenic	11956
AR_ctr	CD4 mem	chr12	111459870	111459870	1	3	48	Open Sea	NA	NA	NA	NA	0.913819	0.849157	0.0646616	0.104688	3.23e-06	1	0.8	0.0775003	0.933333	0.666667	0.0759181	0	0.00693752	1817635	0	0	14	18.6667	1	3	20	37	6	17	chr12	111185029	111467061	282033	*	inter:12020	NA	NA	NA	hg19_cpg_inter	11956
AR_ctr	CD4 mem	chr2	27600179	27600179	1	1	57	Open Sea	NA	NA	NA	NA	0.740938	0.655168	0.0857692	0.174973	3.25e-06	1	0.55814	0.192698	0.944444	0.4	0.154008	0	0.0069573	1366920	0	0	27.7143	24.8889	4	5	47	44	6	17	chr2	27599473	27600400	928	+	exon:74868	uc002rkg.2	9784	SNX17	hg19_genes_exons	6058
AR_ctr	CD4 mem	chr2	27600179	27600179	1	1	57	Open Sea	NA	NA	NA	NA	0.740938	0.655168	0.0857692	0.174973	3.25e-06	1	0.55814	0.192698	0.944444	0.4	0.154008	0	0.0069573	1366920	0	0	27.7143	24.8889	4	5	47	44	6	17	chr2	27599473	27600400	928	+	exon:74884	uc002rkh.2	9784	SNX17	hg19_genes_exons	6058
AR_ctr	CD4 mem	chr2	27600179	27600179	1	1	57	Open Sea	NA	NA	NA	NA	0.740938	0.655168	0.0857692	0.174973	3.25e-06	1	0.55814	0.192698	0.944444	0.4	0.154008	0	0.0069573	1366920	0	0	27.7143	24.8889	4	5	47	44	6	17	chr2	27599473	27600400	928	+	exon:74896	uc002rki.2	9784	SNX17	hg19_genes_exons	6058
AR_ctr	CD4 mem	chr2	27600179	27600179	1	1	57	Open Sea	NA	NA	NA	NA	0.740938	0.655168	0.0857692	0.174973	3.25e-06	1	0.55814	0.192698	0.944444	0.4	0.154008	0	0.0069573	1366920	0	0	27.7143	24.8889	4	5	47	44	6	17	chr2	27599473	27600400	928	+	exon:74910	uc010eza.2	9784	SNX17	hg19_genes_exons	6058
AR_ctr	CD4 mem	chr2	27600179	27600179	1	1	57	Open Sea	NA	NA	NA	NA	0.740938	0.655168	0.0857692	0.174973	3.25e-06	1	0.55814	0.192698	0.944444	0.4	0.154008	0	0.0069573	1366920	0	0	27.7143	24.8889	4	5	47	44	6	17	chr2	27599473	27600400	928	+	exon:74925	uc010ylj.2	9784	SNX17	hg19_genes_exons	6058
AR_ctr	CD4 mem	chr2	27600179	27600179	1	1	57	Open Sea	NA	NA	NA	NA	0.740938	0.655168	0.0857692	0.174973	3.25e-06	1	0.55814	0.192698	0.944444	0.4	0.154008	0	0.0069573	1366920	0	0	27.7143	24.8889	4	5	47	44	6	17	chr2	27599473	27600400	928	+	exon:74938	uc010ylk.2	9784	SNX17	hg19_genes_exons	6058
AR_ctr	CD4 mem	chr2	27600179	27600179	1	1	57	Open Sea	NA	NA	NA	NA	0.740938	0.655168	0.0857692	0.174973	3.25e-06	1	0.55814	0.192698	0.944444	0.4	0.154008	0	0.0069573	1366920	0	0	27.7143	24.8889	4	5	47	44	6	17	chr2	27599473	27600400	928	+	exon:74954	uc010yll.2	9784	SNX17	hg19_genes_exons	6058
AR_ctr	CD4 mem	chr2	27600179	27600179	1	1	57	Open Sea	NA	NA	NA	NA	0.740938	0.655168	0.0857692	0.174973	3.25e-06	1	0.55814	0.192698	0.944444	0.4	0.154008	0	0.0069573	1366920	0	0	27.7143	24.8889	4	5	47	44	6	17	chr2	27599473	27600400	928	+	exon:74969	uc010ylm.2	9784	SNX17	hg19_genes_exons	6058
AR_ctr	CD4 mem	chr2	27600179	27600179	1	1	57	Open Sea	NA	NA	NA	NA	0.740938	0.655168	0.0857692	0.174973	3.25e-06	1	0.55814	0.192698	0.944444	0.4	0.154008	0	0.0069573	1366920	0	0	27.7143	24.8889	4	5	47	44	6	17	chr2	27599473	27600400	928	+	exon:74984	uc010yln.2	9784	SNX17	hg19_genes_exons	6058
AR_ctr	CD4 mem	chr2	27600179	27600179	1	1	57	Open Sea	NA	NA	NA	NA	0.740938	0.655168	0.0857692	0.174973	3.25e-06	1	0.55814	0.192698	0.944444	0.4	0.154008	0	0.0069573	1366920	0	0	27.7143	24.8889	4	5	47	44	6	17	chr2	27599473	27600400	928	+	exon:74999	uc010ylo.2	9784	SNX17	hg19_genes_exons	6058
AR_ctr	CD4 mem	chr2	27600179	27600179	1	1	57	Open Sea	NA	NA	NA	NA	0.740938	0.655168	0.0857692	0.174973	3.25e-06	1	0.55814	0.192698	0.944444	0.4	0.154008	0	0.0069573	1366920	0	0	27.7143	24.8889	4	5	47	44	6	17	chr2	27599473	27600400	928	+	exon:75013	uc010ylp.2	9784	SNX17	hg19_genes_exons	6058
AR_ctr	CD4 mem	chr2	27600179	27600179	1	1	57	Open Sea	NA	NA	NA	NA	0.740938	0.655168	0.0857692	0.174973	3.25e-06	1	0.55814	0.192698	0.944444	0.4	0.154008	0	0.0069573	1366920	0	0	27.7143	24.8889	4	5	47	44	6	17	chr2	27599473	27600400	928	+	exon:75028	uc010ylq.2	9784	SNX17	hg19_genes_exons	6058
AR_ctr	CD4 mem	chr2	27600179	27600179	1	1	57	Open Sea	NA	NA	NA	NA	0.740938	0.655168	0.0857692	0.174973	3.25e-06	1	0.55814	0.192698	0.944444	0.4	0.154008	0	0.0069573	1366920	0	0	27.7143	24.8889	4	5	47	44	6	17	chr2	27600098	27601238	1141	-	exon:101488	uc002rkj.3	130557	ZNF513	hg19_genes_exons	6058
AR_ctr	CD4 mem	chr2	27600179	27600179	1	1	57	Open Sea	NA	NA	NA	NA	0.740938	0.655168	0.0857692	0.174973	3.25e-06	1	0.55814	0.192698	0.944444	0.4	0.154008	0	0.0069573	1366920	0	0	27.7143	24.8889	4	5	47	44	6	17	chr2	27600098	27601238	1141	-	exon:101492	uc002rkk.3	130557	ZNF513	hg19_genes_exons	6058
AR_ctr	CD4 mem	chr2	27600179	27600179	1	1	57	Open Sea	NA	NA	NA	NA	0.740938	0.655168	0.0857692	0.174973	3.25e-06	1	0.55814	0.192698	0.944444	0.4	0.154008	0	0.0069573	1366920	0	0	27.7143	24.8889	4	5	47	44	6	17	chr2	27599587	27600400	814	+	3UTR:6505	uc002rkg.2	9784	SNX17	hg19_genes_3UTRs	6058
AR_ctr	CD4 mem	chr2	27600179	27600179	1	1	57	Open Sea	NA	NA	NA	NA	0.740938	0.655168	0.0857692	0.174973	3.25e-06	1	0.55814	0.192698	0.944444	0.4	0.154008	0	0.0069573	1366920	0	0	27.7143	24.8889	4	5	47	44	6	17	chr2	27599587	27600400	814	+	3UTR:6506	uc002rkh.2	9784	SNX17	hg19_genes_3UTRs	6058
AR_ctr	CD4 mem	chr2	27600179	27600179	1	1	57	Open Sea	NA	NA	NA	NA	0.740938	0.655168	0.0857692	0.174973	3.25e-06	1	0.55814	0.192698	0.944444	0.4	0.154008	0	0.0069573	1366920	0	0	27.7143	24.8889	4	5	47	44	6	17	chr2	27599587	27600400	814	+	3UTR:6507	uc010eza.2	9784	SNX17	hg19_genes_3UTRs	6058
AR_ctr	CD4 mem	chr2	27600179	27600179	1	1	57	Open Sea	NA	NA	NA	NA	0.740938	0.655168	0.0857692	0.174973	3.25e-06	1	0.55814	0.192698	0.944444	0.4	0.154008	0	0.0069573	1366920	0	0	27.7143	24.8889	4	5	47	44	6	17	chr2	27599587	27600400	814	+	3UTR:6508	uc010ylj.2	9784	SNX17	hg19_genes_3UTRs	6058
AR_ctr	CD4 mem	chr2	27600179	27600179	1	1	57	Open Sea	NA	NA	NA	NA	0.740938	0.655168	0.0857692	0.174973	3.25e-06	1	0.55814	0.192698	0.944444	0.4	0.154008	0	0.0069573	1366920	0	0	27.7143	24.8889	4	5	47	44	6	17	chr2	27599587	27600400	814	+	3UTR:6509	uc010ylk.2	9784	SNX17	hg19_genes_3UTRs	6058
AR_ctr	CD4 mem	chr2	27600179	27600179	1	1	57	Open Sea	NA	NA	NA	NA	0.740938	0.655168	0.0857692	0.174973	3.25e-06	1	0.55814	0.192698	0.944444	0.4	0.154008	0	0.0069573	1366920	0	0	27.7143	24.8889	4	5	47	44	6	17	chr2	27599587	27600400	814	+	3UTR:6510	uc010yll.2	9784	SNX17	hg19_genes_3UTRs	6058
AR_ctr	CD4 mem	chr2	27600179	27600179	1	1	57	Open Sea	NA	NA	NA	NA	0.740938	0.655168	0.0857692	0.174973	3.25e-06	1	0.55814	0.192698	0.944444	0.4	0.154008	0	0.0069573	1366920	0	0	27.7143	24.8889	4	5	47	44	6	17	chr2	27599587	27600400	814	+	3UTR:6511	uc010ylm.2	9784	SNX17	hg19_genes_3UTRs	6058
AR_ctr	CD4 mem	chr2	27600179	27600179	1	1	57	Open Sea	NA	NA	NA	NA	0.740938	0.655168	0.0857692	0.174973	3.25e-06	1	0.55814	0.192698	0.944444	0.4	0.154008	0	0.0069573	1366920	0	0	27.7143	24.8889	4	5	47	44	6	17	chr2	27599587	27600400	814	+	3UTR:6512	uc010yln.2	9784	SNX17	hg19_genes_3UTRs	6058
AR_ctr	CD4 mem	chr2	27600179	27600179	1	1	57	Open Sea	NA	NA	NA	NA	0.740938	0.655168	0.0857692	0.174973	3.25e-06	1	0.55814	0.192698	0.944444	0.4	0.154008	0	0.0069573	1366920	0	0	27.7143	24.8889	4	5	47	44	6	17	chr2	27599587	27600400	814	+	3UTR:6513	uc010ylo.2	9784	SNX17	hg19_genes_3UTRs	6058
AR_ctr	CD4 mem	chr2	27600179	27600179	1	1	57	Open Sea	NA	NA	NA	NA	0.740938	0.655168	0.0857692	0.174973	3.25e-06	1	0.55814	0.192698	0.944444	0.4	0.154008	0	0.0069573	1366920	0	0	27.7143	24.8889	4	5	47	44	6	17	chr2	27599587	27600400	814	+	3UTR:6514	uc010ylp.2	9784	SNX17	hg19_genes_3UTRs	6058
AR_ctr	CD4 mem	chr2	27600179	27600179	1	1	57	Open Sea	NA	NA	NA	NA	0.740938	0.655168	0.0857692	0.174973	3.25e-06	1	0.55814	0.192698	0.944444	0.4	0.154008	0	0.0069573	1366920	0	0	27.7143	24.8889	4	5	47	44	6	17	chr2	27599587	27600400	814	+	3UTR:6515	uc010ylq.2	9784	SNX17	hg19_genes_3UTRs	6058
AR_ctr	CD4 mem	chr2	27600179	27600179	1	1	57	Open Sea	NA	NA	NA	NA	0.740938	0.655168	0.0857692	0.174973	3.25e-06	1	0.55814	0.192698	0.944444	0.4	0.154008	0	0.0069573	1366920	0	0	27.7143	24.8889	4	5	47	44	6	17	chr2	27600098	27600411	314	-	3UTR:8691	uc002rkj.3	130557	ZNF513	hg19_genes_3UTRs	6058
AR_ctr	CD4 mem	chr2	27600179	27600179	1	1	57	Open Sea	NA	NA	NA	NA	0.740938	0.655168	0.0857692	0.174973	3.25e-06	1	0.55814	0.192698	0.944444	0.4	0.154008	0	0.0069573	1366920	0	0	27.7143	24.8889	4	5	47	44	6	17	chr2	27600098	27600411	314	-	3UTR:8692	uc002rkk.3	130557	ZNF513	hg19_genes_3UTRs	6058
AR_ctr	CD4 mem	chr2	27600179	27600179	1	1	57	Open Sea	NA	NA	NA	NA	0.740938	0.655168	0.0857692	0.174973	3.25e-06	1	0.55814	0.192698	0.944444	0.4	0.154008	0	0.0069573	1366920	0	0	27.7143	24.8889	4	5	47	44	6	17	chr2	27599342	27601341	2000	*	shore:4993	NA	NA	NA	hg19_cpg_shores	6058
AR_ctr	CD4 mem	chr2	119391491	119391491	1	2	48	Open Sea	NA	NA	NA	NA	0.894091	0.79893	0.0951616	0.160454	3.29e-06	1	0.702128	0.111862	0.916667	0.333333	0.141258	0	0.00703644	1438933	0	0	29.8571	29.1111	15	9	47	53	7	17	chr2	118954627	119599746	645120	*	intergenic:2221	NA	NA	NA	hg19_genes_intergenic	308252
AR_ctr	CD4 mem	chr2	119391491	119391491	1	2	48	Open Sea	NA	NA	NA	NA	0.894091	0.79893	0.0951616	0.160454	3.29e-06	1	0.702128	0.111862	0.916667	0.333333	0.141258	0	0.00703644	1438933	0	0	29.8571	29.1111	15	9	47	53	7	17	chr2	118986467	119528065	541599	*	inter:2551	NA	NA	NA	hg19_cpg_inter	308252
AR_ctr	CD4 mem	chr22	46387864	46387864	1	3	59	Open Sea	NA	NA	NA	NA	0.884323	0.833668	0.0506547	0.0841202	3.34e-06	1	0.771429	0.100837	0.925373	0.744681	0.0551432	0	0.00712442	2010016	0	0	48.2857	67.6111	8	34	70	113	6	18	chr22	46378009	46397495	19487	*	intergenic:15520	NA	NA	NA	hg19_genes_intergenic	14630
AR_ctr	CD4 mem	chr22	46387864	46387864	1	3	59	Open Sea	NA	NA	NA	NA	0.884323	0.833668	0.0506547	0.0841202	3.34e-06	1	0.771429	0.100837	0.925373	0.744681	0.0551432	0	0.00712442	2010016	0	0	48.2857	67.6111	8	34	70	113	6	18	chr22	46379235	46419299	40065	*	inter:18978	NA	NA	NA	hg19_cpg_inter	14630
AR_ctr	CD4 mem	chr17	4440786	4440786	1	4	64	Open Sea	NA	NA	NA	NA	0.833107	0.70991	0.123197	0.227899	3.38e-06	1	0.535714	0.157858	0.956522	0.125	0.226926	0	0.00718369	1159876	0	0	20.1429	23.4444	2	5	39	45	6	16	chr17	4440748	4441234	487	+	CDS:437413	uc002fxy.2	124976	SPNS2	hg19_genes_cds	728
AR_ctr	CD4 mem	chr17	4440786	4440786	1	4	64	Open Sea	NA	NA	NA	NA	0.833107	0.70991	0.123197	0.227899	3.38e-06	1	0.535714	0.157858	0.956522	0.125	0.226926	0	0.00718369	1159876	0	0	20.1429	23.4444	2	5	39	45	6	16	chr17	4440748	4443228	2481	+	exon:550347	uc002fxx.2	124976	SPNS2	hg19_genes_exons	728
AR_ctr	CD4 mem	chr17	4440786	4440786	1	4	64	Open Sea	NA	NA	NA	NA	0.833107	0.70991	0.123197	0.227899	3.38e-06	1	0.535714	0.157858	0.956522	0.125	0.226926	0	0.00718369	1159876	0	0	20.1429	23.4444	2	5	39	45	6	16	chr17	4440748	4443228	2481	+	exon:550349	uc002fxy.2	124976	SPNS2	hg19_genes_exons	728
AR_ctr	CD4 mem	chr17	4440786	4440786	1	4	64	Open Sea	NA	NA	NA	NA	0.833107	0.70991	0.123197	0.227899	3.38e-06	1	0.535714	0.157858	0.956522	0.125	0.226926	0	0.00718369	1159876	0	0	20.1429	23.4444	2	5	39	45	6	16	chr17	4440548	4440947	400	+	intronexonboundary:512684	uc002fxx.2	124976	SPNS2	hg19_genes_intronexonboundaries	728
AR_ctr	CD4 mem	chr17	4440786	4440786	1	4	64	Open Sea	NA	NA	NA	NA	0.833107	0.70991	0.123197	0.227899	3.38e-06	1	0.535714	0.157858	0.956522	0.125	0.226926	0	0.00718369	1159876	0	0	20.1429	23.4444	2	5	39	45	6	16	chr17	4440548	4440947	400	+	intronexonboundary:512685	uc002fxy.2	124976	SPNS2	hg19_genes_intronexonboundaries	728
AR_ctr	CD4 mem	chr17	4440786	4440786	1	4	64	Open Sea	NA	NA	NA	NA	0.833107	0.70991	0.123197	0.227899	3.38e-06	1	0.535714	0.157858	0.956522	0.125	0.226926	0	0.00718369	1159876	0	0	20.1429	23.4444	2	5	39	45	6	16	chr17	4440748	4443228	2481	+	3UTR:46111	uc002fxx.2	124976	SPNS2	hg19_genes_3UTRs	728
AR_ctr	CD4 mem	chr17	4440786	4440786	1	4	64	Open Sea	NA	NA	NA	NA	0.833107	0.70991	0.123197	0.227899	3.38e-06	1	0.535714	0.157858	0.956522	0.125	0.226926	0	0.00718369	1159876	0	0	20.1429	23.4444	2	5	39	45	6	16	chr17	4439706	4441705	2000	*	shore:36878	NA	NA	NA	hg19_cpg_shores	728
AR_ctr	CD4 mem	chr14	57279101	57279101	1	6	63	Island	NA	NA	NA	NA	0.0480621	0.0913558	-0.0432937	-0.80376	3.46e-06	0.113208	0	0.0427983	0.282609	0.0253165	0.065967	0	0.00734108	1600780	0	0	55.2857	67.5	37	17	75	127	7	18	chr14	57278901	57279900	1000	+	promoter:51375	uc001xcr.3	100309464	OTX2-AS1	hg19_genes_promoters	376
AR_ctr	CD4 mem	chr14	57279101	57279101	1	6	63	Island	NA	NA	NA	NA	0.0480621	0.0913558	-0.0432937	-0.80376	3.46e-06	0.113208	0	0.0427983	0.282609	0.0253165	0.065967	0	0.00734108	1600780	0	0	55.2857	67.5	37	17	75	127	7	18	chr14	57278195	57282194	4000	-	1to5kb:52817	uc001xcq.4	5015	OTX2	hg19_genes_1to5kb	376
AR_ctr	CD4 mem	chr14	57279101	57279101	1	6	63	Island	NA	NA	NA	NA	0.0480621	0.0913558	-0.0432937	-0.80376	3.46e-06	0.113208	0	0.0427983	0.282609	0.0253165	0.065967	0	0.00734108	1600780	0	0	55.2857	67.5	37	17	75	127	7	18	chr14	57278195	57282194	4000	-	1to5kb:52818	uc010aou.4	5015	OTX2	hg19_genes_1to5kb	376
AR_ctr	CD4 mem	chr14	57279101	57279101	1	6	63	Island	NA	NA	NA	NA	0.0480621	0.0913558	-0.0432937	-0.80376	3.46e-06	0.113208	0	0.0427983	0.282609	0.0253165	0.065967	0	0.00734108	1600780	0	0	55.2857	67.5	37	17	75	127	7	18	chr14	57278195	57282194	4000	-	1to5kb:52819	uc031qos.1	5015	OTX2	hg19_genes_1to5kb	376
AR_ctr	CD4 mem	chr14	57279101	57279101	1	6	63	Island	NA	NA	NA	NA	0.0480621	0.0913558	-0.0432937	-0.80376	3.46e-06	0.113208	0	0.0427983	0.282609	0.0253165	0.065967	0	0.00734108	1600780	0	0	55.2857	67.5	37	17	75	127	7	18	chr14	57278195	57282194	4000	-	1to5kb:52820	uc031qot.1	5015	OTX2	hg19_genes_1to5kb	376
AR_ctr	CD4 mem	chr14	57279101	57279101	1	6	63	Island	NA	NA	NA	NA	0.0480621	0.0913558	-0.0432937	-0.80376	3.46e-06	0.113208	0	0.0427983	0.282609	0.0253165	0.065967	0	0.00734108	1600780	0	0	55.2857	67.5	37	17	75	127	7	18	chr14	57278975	57280029	1055	+	intron:420062	uc021rtn.1	100309464	OTX2-AS1	hg19_genes_introns	376
AR_ctr	CD4 mem	chr14	57279101	57279101	1	6	63	Island	NA	NA	NA	NA	0.0480621	0.0913558	-0.0432937	-0.80376	3.46e-06	0.113208	0	0.0427983	0.282609	0.0253165	0.065967	0	0.00734108	1600780	0	0	55.2857	67.5	37	17	75	127	7	18	chr14	57278774	57279173	400	+	exonintronboundary:442299	uc021rtn.1	100309464	OTX2-AS1	hg19_genes_exonintronboundaries	376
AR_ctr	CD4 mem	chr14	57279101	57279101	1	6	63	Island	NA	NA	NA	NA	0.0480621	0.0913558	-0.0432937	-0.80376	3.46e-06	0.113208	0	0.0427983	0.282609	0.0253165	0.065967	0	0.00734108	1600780	0	0	55.2857	67.5	37	17	75	127	7	18	chr14	57278710	57279116	407	*	island:17259	NA	NA	NA	hg19_cpg_islands	376
AR_ctr	CD4 mem	chr16	68543438	68543438	1	3	53	Open Sea	NA	NA	NA	NA	0.824425	0.756547	0.0678785	0.122409	3.47e-06	1	0.6	0.161681	0.933333	0.5	0.129972	0	0.00735867	1679257	0	2	17.4286	12.8333	9	0	34	29	6	14	chr16	68513568	68559047	45480	*	intergenic:12425	NA	NA	NA	hg19_genes_intergenic	20608
AR_ctr	CD4 mem	chr16	68543438	68543438	1	3	53	Open Sea	NA	NA	NA	NA	0.824425	0.756547	0.0678785	0.122409	3.47e-06	1	0.6	0.161681	0.933333	0.5	0.129972	0	0.00735867	1679257	0	2	17.4286	12.8333	9	0	34	29	6	14	chr16	68541926	68543925	2000	*	shore:35870	NA	NA	NA	hg19_cpg_shores	20608
AR_ctr	CD4 mem	chr22	24317408	24317408	1	5	52	Open Sea	NA	NA	NA	NA	0.679279	0.551837	0.127442	0.294936	3.48e-06	0.846154	0.5	0.1368	0.73913	0.111111	0.159008	0	0.00736943	977572	0	0	13.5714	14.7222	8	8	27	23	5	15	chr22	24316681	24317680	1000	-	promoter:74674	uc002zyz.4	1652	DDT	hg19_genes_promoters	4904
AR_ctr	CD4 mem	chr22	24317408	24317408	1	5	52	Open Sea	NA	NA	NA	NA	0.679279	0.551837	0.127442	0.294936	3.48e-06	0.846154	0.5	0.1368	0.73913	0.111111	0.159008	0	0.00736943	977572	0	0	13.5714	14.7222	8	8	27	23	5	15	chr22	24317314	24321313	4000	+	1to5kb:73731	uc002zzb.4	2953	GSTT2	hg19_genes_1to5kb	4904
AR_ctr	CD4 mem	chr22	24317408	24317408	1	5	52	Open Sea	NA	NA	NA	NA	0.679279	0.551837	0.127442	0.294936	3.48e-06	0.846154	0.5	0.1368	0.73913	0.111111	0.159008	0	0.00736943	977572	0	0	13.5714	14.7222	8	8	27	23	5	15	chr22	24317314	24321313	4000	+	1to5kb:73732	uc002zzc.4	2953	GSTT2	hg19_genes_1to5kb	4904
AR_ctr	CD4 mem	chr22	24317408	24317408	1	5	52	Open Sea	NA	NA	NA	NA	0.679279	0.551837	0.127442	0.294936	3.48e-06	0.846154	0.5	0.1368	0.73913	0.111111	0.159008	0	0.00736943	977572	0	0	13.5714	14.7222	8	8	27	23	5	15	chr22	24316629	24321916	5288	-	intron:600113	uc002zza.4	1652	DDT	hg19_genes_introns	4904
AR_ctr	CD4 mem	chr22	24317408	24317408	1	5	52	Open Sea	NA	NA	NA	NA	0.679279	0.551837	0.127442	0.294936	3.48e-06	0.846154	0.5	0.1368	0.73913	0.111111	0.159008	0	0.00736943	977572	0	0	13.5714	14.7222	8	8	27	23	5	15	chr22	24316944	24318943	2000	*	shore:47225	NA	NA	NA	hg19_cpg_shores	4904
AR_ctr	CD4 mem	chr2	169296302	169296302	1	1	44	Open Sea	NA	NA	NA	NA	0.218367	0.351593	-0.133225	-0.663008	3.49e-06	0.428571	0	0.177375	0.833333	0	0.203719	0	0.00739553	542158	0	0	10.5714	16.5556	4	6	15	30	5	14	chr2	169109106	169302833	193728	*	intergenic:2396	NA	NA	NA	hg19_genes_intergenic	11530
AR_ctr	CD4 mem	chr2	169296302	169296302	1	1	44	Open Sea	NA	NA	NA	NA	0.218367	0.351593	-0.133225	-0.663008	3.49e-06	0.428571	0	0.177375	0.833333	0	0.203719	0	0.00739553	542158	0	0	10.5714	16.5556	4	6	15	30	5	14	chr2	169108455	169308417	199963	*	inter:2749	NA	NA	NA	hg19_cpg_inter	11530
AR_ctr	CD4 mem	chr1	228776689	228776689	1	14	69	Island	NA	NA	NA	NA	0.792701	0.658316	0.134385	0.264332	3.52e-06	1	0.4	0.230894	1	0.25	0.202451	0	0.00745297	1050129	0	1	14.8571	13	2	0	27	24	5	13	chr1	228775394	228779393	4000	+	1to5kb:3831	uc001htd.2	574029	DUSP5P1	hg19_genes_1to5kb	3703
AR_ctr	CD4 mem	chr1	228776689	228776689	1	14	69	Island	NA	NA	NA	NA	0.792701	0.658316	0.134385	0.264332	3.52e-06	1	0.4	0.230894	1	0.25	0.202451	0	0.00745297	1050129	0	1	14.8571	13	2	0	27	24	5	13	chr1	228775394	228779393	4000	+	1to5kb:3832	uc021pkj.1	58480	RHOU	hg19_genes_1to5kb	3703
AR_ctr	CD4 mem	chr1	228776689	228776689	1	14	69	Island	NA	NA	NA	NA	0.792701	0.658316	0.134385	0.264332	3.52e-06	1	0.4	0.230894	1	0.25	0.202451	0	0.00745297	1050129	0	1	14.8571	13	2	0	27	24	5	13	chr1	228744111	228784168	40058	*	island:2319	NA	NA	NA	hg19_cpg_islands	3703
AR_ctr	CD4 mem	chr11	57536680	57536680	1	4	56	Open Sea	NA	NA	NA	NA	0.152494	0.223335	-0.0708403	-0.522011	3.55e-06	0.375	0	0.138095	0.419355	0.0869565	0.083993	0	0.00751443	1049917	0	0	21.7143	29.1667	9	12	40	46	6	18	chr11	57505141	57556508	51368	+	intron:343091	uc001nlf.2	100528016	TMX2-CTNND1	hg19_genes_introns	7445
AR_ctr	CD4 mem	chr11	57536680	57536680	1	4	56	Open Sea	NA	NA	NA	NA	0.152494	0.223335	-0.0708403	-0.522011	3.55e-06	0.375	0	0.138095	0.419355	0.0869565	0.083993	0	0.00751443	1049917	0	0	21.7143	29.1667	9	12	40	46	6	18	chr11	57521015	57556508	35494	+	intron:343113	uc021qjk.1	1500	CTNND1	hg19_genes_introns	7445
AR_ctr	CD4 mem	chr11	57536680	57536680	1	4	56	Open Sea	NA	NA	NA	NA	0.152494	0.223335	-0.0708403	-0.522011	3.55e-06	0.375	0	0.138095	0.419355	0.0869565	0.083993	0	0.00751443	1049917	0	0	21.7143	29.1667	9	12	40	46	6	18	chr11	57520880	57556508	35629	+	intron:343131	uc001nlh.1	100528016	TMX2-CTNND1	hg19_genes_introns	7445
AR_ctr	CD4 mem	chr11	57536680	57536680	1	4	56	Open Sea	NA	NA	NA	NA	0.152494	0.223335	-0.0708403	-0.522011	3.55e-06	0.375	0	0.138095	0.419355	0.0869565	0.083993	0	0.00751443	1049917	0	0	21.7143	29.1667	9	12	40	46	6	18	chr11	57529592	57556508	26917	+	intron:343150	uc001nli.4	1500	CTNND1	hg19_genes_introns	7445
AR_ctr	CD4 mem	chr11	57536680	57536680	1	4	56	Open Sea	NA	NA	NA	NA	0.152494	0.223335	-0.0708403	-0.522011	3.55e-06	0.375	0	0.138095	0.419355	0.0869565	0.083993	0	0.00751443	1049917	0	0	21.7143	29.1667	9	12	40	46	6	18	chr11	57529519	57558965	29447	+	intron:343168	uc001nlj.4	1500	CTNND1	hg19_genes_introns	7445
AR_ctr	CD4 mem	chr11	57536680	57536680	1	4	56	Open Sea	NA	NA	NA	NA	0.152494	0.223335	-0.0708403	-0.522011	3.55e-06	0.375	0	0.138095	0.419355	0.0869565	0.083993	0	0.00751443	1049917	0	0	21.7143	29.1667	9	12	40	46	6	18	chr11	57529519	57558965	29447	+	intron:343186	uc001nlk.4	1500	CTNND1	hg19_genes_introns	7445
AR_ctr	CD4 mem	chr11	57536680	57536680	1	4	56	Open Sea	NA	NA	NA	NA	0.152494	0.223335	-0.0708403	-0.522011	3.55e-06	0.375	0	0.138095	0.419355	0.0869565	0.083993	0	0.00751443	1049917	0	0	21.7143	29.1667	9	12	40	46	6	18	chr11	57529592	57556508	26917	+	intron:343204	uc001nll.4	1500	CTNND1	hg19_genes_introns	7445
AR_ctr	CD4 mem	chr11	57536680	57536680	1	4	56	Open Sea	NA	NA	NA	NA	0.152494	0.223335	-0.0708403	-0.522011	3.55e-06	0.375	0	0.138095	0.419355	0.0869565	0.083993	0	0.00751443	1049917	0	0	21.7143	29.1667	9	12	40	46	6	18	chr11	57529592	57556508	26917	+	intron:343222	uc001nlm.4	1500	CTNND1	hg19_genes_introns	7445
AR_ctr	CD4 mem	chr11	57536680	57536680	1	4	56	Open Sea	NA	NA	NA	NA	0.152494	0.223335	-0.0708403	-0.522011	3.55e-06	0.375	0	0.138095	0.419355	0.0869565	0.083993	0	0.00751443	1049917	0	0	21.7143	29.1667	9	12	40	46	6	18	chr11	57529519	57558856	29338	+	intron:343240	uc001nln.4	1500	CTNND1	hg19_genes_introns	7445
AR_ctr	CD4 mem	chr11	57536680	57536680	1	4	56	Open Sea	NA	NA	NA	NA	0.152494	0.223335	-0.0708403	-0.522011	3.55e-06	0.375	0	0.138095	0.419355	0.0869565	0.083993	0	0.00751443	1049917	0	0	21.7143	29.1667	9	12	40	46	6	18	chr11	57529519	57561481	31963	+	intron:343257	uc001nlo.4	1500	CTNND1	hg19_genes_introns	7445
AR_ctr	CD4 mem	chr11	57536680	57536680	1	4	56	Open Sea	NA	NA	NA	NA	0.152494	0.223335	-0.0708403	-0.522011	3.55e-06	0.375	0	0.138095	0.419355	0.0869565	0.083993	0	0.00751443	1049917	0	0	21.7143	29.1667	9	12	40	46	6	18	chr11	57529519	57558965	29447	+	intron:343274	uc001nlp.4	1500	CTNND1	hg19_genes_introns	7445
AR_ctr	CD4 mem	chr11	57536680	57536680	1	4	56	Open Sea	NA	NA	NA	NA	0.152494	0.223335	-0.0708403	-0.522011	3.55e-06	0.375	0	0.138095	0.419355	0.0869565	0.083993	0	0.00751443	1049917	0	0	21.7143	29.1667	9	12	40	46	6	18	chr11	57529519	57561481	31963	+	intron:343291	uc001nlq.4	1500	CTNND1	hg19_genes_introns	7445
AR_ctr	CD4 mem	chr11	57536680	57536680	1	4	56	Open Sea	NA	NA	NA	NA	0.152494	0.223335	-0.0708403	-0.522011	3.55e-06	0.375	0	0.138095	0.419355	0.0869565	0.083993	0	0.00751443	1049917	0	0	21.7143	29.1667	9	12	40	46	6	18	chr11	57529519	57558965	29447	+	intron:343308	uc001nlr.4	1500	CTNND1	hg19_genes_introns	7445
AR_ctr	CD4 mem	chr11	57536680	57536680	1	4	56	Open Sea	NA	NA	NA	NA	0.152494	0.223335	-0.0708403	-0.522011	3.55e-06	0.375	0	0.138095	0.419355	0.0869565	0.083993	0	0.00751443	1049917	0	0	21.7143	29.1667	9	12	40	46	6	18	chr11	57529519	57561481	31963	+	intron:343325	uc001nls.4	1500	CTNND1	hg19_genes_introns	7445
AR_ctr	CD4 mem	chr11	57536680	57536680	1	4	56	Open Sea	NA	NA	NA	NA	0.152494	0.223335	-0.0708403	-0.522011	3.55e-06	0.375	0	0.138095	0.419355	0.0869565	0.083993	0	0.00751443	1049917	0	0	21.7143	29.1667	9	12	40	46	6	18	chr11	57529519	57561481	31963	+	intron:343341	uc001nlt.4	1500	CTNND1	hg19_genes_introns	7445
AR_ctr	CD4 mem	chr11	57536680	57536680	1	4	56	Open Sea	NA	NA	NA	NA	0.152494	0.223335	-0.0708403	-0.522011	3.55e-06	0.375	0	0.138095	0.419355	0.0869565	0.083993	0	0.00751443	1049917	0	0	21.7143	29.1667	9	12	40	46	6	18	chr11	57529592	57561481	31890	+	intron:343357	uc001nlu.4	1500	CTNND1	hg19_genes_introns	7445
AR_ctr	CD4 mem	chr11	57536680	57536680	1	4	56	Open Sea	NA	NA	NA	NA	0.152494	0.223335	-0.0708403	-0.522011	3.55e-06	0.375	0	0.138095	0.419355	0.0869565	0.083993	0	0.00751443	1049917	0	0	21.7143	29.1667	9	12	40	46	6	18	chr11	57529541	57561481	31941	+	intron:343373	uc001nlv.4	1500	CTNND1	hg19_genes_introns	7445
AR_ctr	CD4 mem	chr11	57536680	57536680	1	4	56	Open Sea	NA	NA	NA	NA	0.152494	0.223335	-0.0708403	-0.522011	3.55e-06	0.375	0	0.138095	0.419355	0.0869565	0.083993	0	0.00751443	1049917	0	0	21.7143	29.1667	9	12	40	46	6	18	chr11	57529519	57563048	33530	+	intron:343389	uc001nlw.4	1500	CTNND1	hg19_genes_introns	7445
AR_ctr	CD4 mem	chr11	57536680	57536680	1	4	56	Open Sea	NA	NA	NA	NA	0.152494	0.223335	-0.0708403	-0.522011	3.55e-06	0.375	0	0.138095	0.419355	0.0869565	0.083993	0	0.00751443	1049917	0	0	21.7143	29.1667	9	12	40	46	6	18	chr11	57529519	57569204	39686	+	intron:343404	uc001nlx.4	1500	CTNND1	hg19_genes_introns	7445
AR_ctr	CD4 mem	chr11	57536680	57536680	1	4	56	Open Sea	NA	NA	NA	NA	0.152494	0.223335	-0.0708403	-0.522011	3.55e-06	0.375	0	0.138095	0.419355	0.0869565	0.083993	0	0.00751443	1049917	0	0	21.7143	29.1667	9	12	40	46	6	18	chr11	57529519	57569204	39686	+	intron:343419	uc001nly.4	1500	CTNND1	hg19_genes_introns	7445
AR_ctr	CD4 mem	chr11	57536680	57536680	1	4	56	Open Sea	NA	NA	NA	NA	0.152494	0.223335	-0.0708403	-0.522011	3.55e-06	0.375	0	0.138095	0.419355	0.0869565	0.083993	0	0.00751443	1049917	0	0	21.7143	29.1667	9	12	40	46	6	18	chr11	57529519	57569204	39686	+	intron:343433	uc001nlz.4	1500	CTNND1	hg19_genes_introns	7445
AR_ctr	CD4 mem	chr11	57536680	57536680	1	4	56	Open Sea	NA	NA	NA	NA	0.152494	0.223335	-0.0708403	-0.522011	3.55e-06	0.375	0	0.138095	0.419355	0.0869565	0.083993	0	0.00751443	1049917	0	0	21.7143	29.1667	9	12	40	46	6	18	chr11	57529519	57569204	39686	+	intron:343447	uc001nma.4	1500	CTNND1	hg19_genes_introns	7445
AR_ctr	CD4 mem	chr11	57536680	57536680	1	4	56	Open Sea	NA	NA	NA	NA	0.152494	0.223335	-0.0708403	-0.522011	3.55e-06	0.375	0	0.138095	0.419355	0.0869565	0.083993	0	0.00751443	1049917	0	0	21.7143	29.1667	9	12	40	46	6	18	chr11	57529519	57569204	39686	+	intron:343460	uc001nmb.4	1500	CTNND1	hg19_genes_introns	7445
AR_ctr	CD4 mem	chr11	57536680	57536680	1	4	56	Open Sea	NA	NA	NA	NA	0.152494	0.223335	-0.0708403	-0.522011	3.55e-06	0.375	0	0.138095	0.419355	0.0869565	0.083993	0	0.00751443	1049917	0	0	21.7143	29.1667	9	12	40	46	6	18	chr11	57529592	57556508	26917	+	intron:343473	uc001nmc.4	1500	CTNND1	hg19_genes_introns	7445
AR_ctr	CD4 mem	chr11	57536680	57536680	1	4	56	Open Sea	NA	NA	NA	NA	0.152494	0.223335	-0.0708403	-0.522011	3.55e-06	0.375	0	0.138095	0.419355	0.0869565	0.083993	0	0.00751443	1049917	0	0	21.7143	29.1667	9	12	40	46	6	18	chr11	57529519	57558965	29447	+	intron:343493	uc001nmd.4	1500	CTNND1	hg19_genes_introns	7445
AR_ctr	CD4 mem	chr11	57536680	57536680	1	4	56	Open Sea	NA	NA	NA	NA	0.152494	0.223335	-0.0708403	-0.522011	3.55e-06	0.375	0	0.138095	0.419355	0.0869565	0.083993	0	0.00751443	1049917	0	0	21.7143	29.1667	9	12	40	46	6	18	chr11	57529592	57556508	26917	+	intron:343512	uc001nme.4	1500	CTNND1	hg19_genes_introns	7445
AR_ctr	CD4 mem	chr11	57536680	57536680	1	4	56	Open Sea	NA	NA	NA	NA	0.152494	0.223335	-0.0708403	-0.522011	3.55e-06	0.375	0	0.138095	0.419355	0.0869565	0.083993	0	0.00751443	1049917	0	0	21.7143	29.1667	9	12	40	46	6	18	chr11	57529592	57556508	26917	+	intron:343531	uc001nmf.4	1500	CTNND1	hg19_genes_introns	7445
AR_ctr	CD4 mem	chr11	57536680	57536680	1	4	56	Open Sea	NA	NA	NA	NA	0.152494	0.223335	-0.0708403	-0.522011	3.55e-06	0.375	0	0.138095	0.419355	0.0869565	0.083993	0	0.00751443	1049917	0	0	21.7143	29.1667	9	12	40	46	6	18	chr11	57529519	57556508	26990	+	intron:343550	uc001nmg.4	1500	CTNND1	hg19_genes_introns	7445
AR_ctr	CD4 mem	chr11	57536680	57536680	1	4	56	Open Sea	NA	NA	NA	NA	0.152494	0.223335	-0.0708403	-0.522011	3.55e-06	0.375	0	0.138095	0.419355	0.0869565	0.083993	0	0.00751443	1049917	0	0	21.7143	29.1667	9	12	40	46	6	18	chr11	57529519	57556508	26990	+	intron:343568	uc001nmh.4	1500	CTNND1	hg19_genes_introns	7445
AR_ctr	CD4 mem	chr11	57536680	57536680	1	4	56	Open Sea	NA	NA	NA	NA	0.152494	0.223335	-0.0708403	-0.522011	3.55e-06	0.375	0	0.138095	0.419355	0.0869565	0.083993	0	0.00751443	1049917	0	0	21.7143	29.1667	9	12	40	46	6	18	chr11	57529519	57561481	31963	+	intron:343586	uc001nmi.4	1500	CTNND1	hg19_genes_introns	7445
AR_ctr	CD4 mem	chr11	57536680	57536680	1	4	56	Open Sea	NA	NA	NA	NA	0.152494	0.223335	-0.0708403	-0.522011	3.55e-06	0.375	0	0.138095	0.419355	0.0869565	0.083993	0	0.00751443	1049917	0	0	21.7143	29.1667	9	12	40	46	6	18	chr11	57529592	57569204	39613	+	intron:343604	uc009ymn.3	1500	CTNND1	hg19_genes_introns	7445
AR_ctr	CD4 mem	chr11	57536680	57536680	1	4	56	Open Sea	NA	NA	NA	NA	0.152494	0.223335	-0.0708403	-0.522011	3.55e-06	0.375	0	0.138095	0.419355	0.0869565	0.083993	0	0.00751443	1049917	0	0	21.7143	29.1667	9	12	40	46	6	18	chr11	57524754	58341673	816920	*	inter:10747	NA	NA	NA	hg19_cpg_inter	7445
AR_ctr	CD4 mem	chr11	116451193	116451193	1	14	74	Island	NA	NA	NA	NA	0.112265	0.205009	-0.0927439	-0.814386	3.56e-06	0.307692	0	0.118377	0.625	0.0384615	0.152973	0	0.00752239	760052	0	0	19.1429	20.9444	13	2	27	39	7	16	chr11	116354915	116618885	263971	*	intergenic:9675	NA	NA	NA	hg19_genes_intergenic	249429
AR_ctr	CD4 mem	chr11	116451193	116451193	1	14	74	Island	NA	NA	NA	NA	0.112265	0.205009	-0.0927439	-0.814386	3.56e-06	0.307692	0	0.118377	0.625	0.0384615	0.152973	0	0.00752239	760052	0	0	19.1429	20.9444	13	2	27	39	7	16	chr11	116450660	116451912	1253	*	island:14986	NA	NA	NA	hg19_cpg_islands	249429
AR_ctr	CD4 mem	chr17	73601335	73601335	1	6	52	Open Sea	NA	NA	NA	NA	0.88017	0.67087	0.2093	0.386701	3.61e-06	1	0.6875	0.113142	0.846154	0.285714	0.165825	0	0.00761991	812683	0	0	11.7143	12.1111	4	5	17	19	5	14	chr17	73599269	73601519	2251	+	exon:566491	uc002joq.4	80022	MYO15B	hg19_genes_exons	2423
AR_ctr	CD4 mem	chr17	73601335	73601335	1	6	52	Open Sea	NA	NA	NA	NA	0.88017	0.67087	0.2093	0.386701	3.61e-06	1	0.6875	0.113142	0.846154	0.285714	0.165825	0	0.00761991	812683	0	0	11.7143	12.1111	4	5	17	19	5	14	chr17	73599362	73601567	2206	+	intron:504135	uc002jom.1	80022	MYO15B	hg19_genes_introns	2423
AR_ctr	CD4 mem	chr17	73601335	73601335	1	6	52	Open Sea	NA	NA	NA	NA	0.88017	0.67087	0.2093	0.386701	3.61e-06	1	0.6875	0.113142	0.846154	0.285714	0.165825	0	0.00761991	812683	0	0	11.7143	12.1111	4	5	17	19	5	14	chr17	73599394	73601584	2191	+	intron:504159	uc002jon.1	80022	MYO15B	hg19_genes_introns	2423
AR_ctr	CD4 mem	chr17	73601335	73601335	1	6	52	Open Sea	NA	NA	NA	NA	0.88017	0.67087	0.2093	0.386701	3.61e-06	1	0.6875	0.113142	0.846154	0.285714	0.165825	0	0.00761991	812683	0	0	11.7143	12.1111	4	5	17	19	5	14	chr17	73599159	73606246	7088	+	intron:504190	uc002joo.1	80022	MYO15B	hg19_genes_introns	2423
AR_ctr	CD4 mem	chr17	73601335	73601335	1	6	52	Open Sea	NA	NA	NA	NA	0.88017	0.67087	0.2093	0.386701	3.61e-06	1	0.6875	0.113142	0.846154	0.285714	0.165825	0	0.00761991	812683	0	0	11.7143	12.1111	4	5	17	19	5	14	chr17	73599394	73601584	2191	+	intron:504224	uc010dgh.3	80022	MYO15B	hg19_genes_introns	2423
AR_ctr	CD4 mem	chr17	73601335	73601335	1	6	52	Open Sea	NA	NA	NA	NA	0.88017	0.67087	0.2093	0.386701	3.61e-06	1	0.6875	0.113142	0.846154	0.285714	0.165825	0	0.00761991	812683	0	0	11.7143	12.1111	4	5	17	19	5	14	chr17	73599394	73601584	2191	+	intron:504286	uc010wse.2	80022	MYO15B	hg19_genes_introns	2423
AR_ctr	CD4 mem	chr17	73601335	73601335	1	6	52	Open Sea	NA	NA	NA	NA	0.88017	0.67087	0.2093	0.386701	3.61e-06	1	0.6875	0.113142	0.846154	0.285714	0.165825	0	0.00761991	812683	0	0	11.7143	12.1111	4	5	17	19	5	14	chr17	73599394	73601584	2191	+	intron:504336	uc010dgi.1	80022	MYO15B	hg19_genes_introns	2423
AR_ctr	CD4 mem	chr17	73601335	73601335	1	6	52	Open Sea	NA	NA	NA	NA	0.88017	0.67087	0.2093	0.386701	3.61e-06	1	0.6875	0.113142	0.846154	0.285714	0.165825	0	0.00761991	812683	0	0	11.7143	12.1111	4	5	17	19	5	14	chr17	73601319	73601718	400	+	exonintronboundary:532172	uc002joq.4	80022	MYO15B	hg19_genes_exonintronboundaries	2423
AR_ctr	CD4 mem	chr17	73601335	73601335	1	6	52	Open Sea	NA	NA	NA	NA	0.88017	0.67087	0.2093	0.386701	3.61e-06	1	0.6875	0.113142	0.846154	0.285714	0.165825	0	0.00761991	812683	0	0	11.7143	12.1111	4	5	17	19	5	14	chr17	73599470	73601519	2050	+	3UTR:47493	uc002joq.4	80022	MYO15B	hg19_genes_3UTRs	2423
AR_ctr	CD4 mem	chr17	73601335	73601335	1	6	52	Open Sea	NA	NA	NA	NA	0.88017	0.67087	0.2093	0.386701	3.61e-06	1	0.6875	0.113142	0.846154	0.285714	0.165825	0	0.00761991	812683	0	0	11.7143	12.1111	4	5	17	19	5	14	chr17	73590338	73623542	33205	*	inter:15784	NA	NA	NA	hg19_cpg_inter	2423
AR_ctr	CD4 mem	chr20	3145681	3145681	1	8	68	Island	NA	NA	NA	NA	0.817077	0.678593	0.138484	0.264369	3.71e-06	1	0.45	0.190958	0.941176	0.307692	0.173506	0	0.00779407	1050032	0	0	21.2857	24.2778	1	5	36	48	6	17	chr20	3145100	3145798	699	-	CDS:516526	uc002wia.1	9762	LZTS3	hg19_genes_cds	43831
AR_ctr	CD4 mem	chr20	3145681	3145681	1	8	68	Island	NA	NA	NA	NA	0.817077	0.678593	0.138484	0.264369	3.71e-06	1	0.45	0.190958	0.941176	0.307692	0.173506	0	0.00779407	1050032	0	0	21.2857	24.2778	1	5	36	48	6	17	chr20	3145100	3145798	699	-	CDS:516530	uc002wib.1	9762	LZTS3	hg19_genes_cds	43831
AR_ctr	CD4 mem	chr20	3145681	3145681	1	8	68	Island	NA	NA	NA	NA	0.817077	0.678593	0.138484	0.264369	3.71e-06	1	0.45	0.190958	0.941176	0.307692	0.173506	0	0.00779407	1050032	0	0	21.2857	24.2778	1	5	36	48	6	17	chr20	3143273	3145798	2526	-	exon:647849	uc002wia.1	9762	LZTS3	hg19_genes_exons	43831
AR_ctr	CD4 mem	chr20	3145681	3145681	1	8	68	Island	NA	NA	NA	NA	0.817077	0.678593	0.138484	0.264369	3.71e-06	1	0.45	0.190958	0.941176	0.307692	0.173506	0	0.00779407	1050032	0	0	21.2857	24.2778	1	5	36	48	6	17	chr20	3143273	3145798	2526	-	exon:647855	uc002wib.1	9762	LZTS3	hg19_genes_exons	43831
AR_ctr	CD4 mem	chr20	3145681	3145681	1	8	68	Island	NA	NA	NA	NA	0.817077	0.678593	0.138484	0.264369	3.71e-06	1	0.45	0.190958	0.941176	0.307692	0.173506	0	0.00779407	1050032	0	0	21.2857	24.2778	1	5	36	48	6	17	chr20	3145599	3145998	400	-	intronexonboundary:602892	uc002wia.1	9762	LZTS3	hg19_genes_intronexonboundaries	43831
AR_ctr	CD4 mem	chr20	3145681	3145681	1	8	68	Island	NA	NA	NA	NA	0.817077	0.678593	0.138484	0.264369	3.71e-06	1	0.45	0.190958	0.941176	0.307692	0.173506	0	0.00779407	1050032	0	0	21.2857	24.2778	1	5	36	48	6	17	chr20	3145599	3145998	400	-	intronexonboundary:602893	uc002wib.1	9762	LZTS3	hg19_genes_intronexonboundaries	43831
AR_ctr	CD4 mem	chr20	3145681	3145681	1	8	68	Island	NA	NA	NA	NA	0.817077	0.678593	0.138484	0.264369	3.71e-06	1	0.45	0.190958	0.941176	0.307692	0.173506	0	0.00779407	1050032	0	0	21.2857	24.2778	1	5	36	48	6	17	chr20	3145122	3145746	625	*	island:24823	NA	NA	NA	hg19_cpg_islands	43831
AR_ctr	CD4 mem	chr22	45665014	45665014	1	10	68	Open Sea	NA	NA	NA	NA	0.0527417	0	0.0527417	2.64942	3.72e-06	0.25	0	0.0883189	0	0	0	0	0.00781569	1380460	0	0	29.5714	31.7222	4	7	45	53	6	17	chr22	45664919	45665214	296	*	enhancer:39532	NA	NA	NA	hg19_enhancers_fantom	15852
AR_ctr	CD4 mem	chr22	45665014	45665014	1	10	68	Open Sea	NA	NA	NA	NA	0.0527417	0	0.0527417	2.64942	3.72e-06	0.25	0	0.0883189	0	0	0	0	0.00781569	1380460	0	0	29.5714	31.7222	4	7	45	53	6	17	chr22	45641651	45675867	34217	*	intergenic:15512	NA	NA	NA	hg19_genes_intergenic	15852
AR_ctr	CD4 mem	chr22	45665014	45665014	1	10	68	Open Sea	NA	NA	NA	NA	0.0527417	0	0.0527417	2.64942	3.72e-06	0.25	0	0.0883189	0	0	0	0	0.00781569	1380460	0	0	29.5714	31.7222	4	7	45	53	6	17	chr22	45664821	45666820	2000	*	shore:47870	NA	NA	NA	hg19_cpg_shores	15852
AR_ctr	CD4 mem	chr18	39355118	39355118	1	7	64	Open Sea	NA	NA	NA	NA	0.936751	0.91818	0.0185714	0.028581	3.76e-06	1	0.878788	0.0489873	1	0.833333	0.0441167	0	0.00786819	2819691	0	0	29.2857	31.3889	10	14	45	46	7	18	chr18	39105562	39530198	424637	*	intergenic:13528	NA	NA	NA	hg19_genes_intergenic	180079
AR_ctr	CD4 mem	chr18	39355118	39355118	1	7	64	Open Sea	NA	NA	NA	NA	0.936751	0.91818	0.0185714	0.028581	3.76e-06	1	0.878788	0.0489873	1	0.833333	0.0441167	0	0.00786819	2819691	0	0	29.2857	31.3889	10	14	45	46	7	18	chr18	37425830	42254983	4829154	*	inter:16176	NA	NA	NA	hg19_cpg_inter	180079
AR_ctr	CD4 mem	chr10	129867928	129867928	1	10	64	Open Sea	NA	NA	NA	NA	0.0792082	0.146991	-0.0677832	-0.815437	3.85e-06	0.2	0	0.0769465	0.304348	0.0243902	0.0755723	0	0.00806031	1096183	0	0	23.2857	30.1111	5	10	45	48	6	18	chr10	129866551	129867955	1405	+	intron:321183	uc001lkb.3	5791	PTPRE	hg19_genes_introns	20133
AR_ctr	CD4 mem	chr10	129867928	129867928	1	10	64	Open Sea	NA	NA	NA	NA	0.0792082	0.146991	-0.0677832	-0.815437	3.85e-06	0.2	0	0.0769465	0.304348	0.0243902	0.0755723	0	0.00806031	1096183	0	0	23.2857	30.1111	5	10	45	48	6	18	chr10	129866551	129867955	1405	+	intron:321204	uc009yat.3	5791	PTPRE	hg19_genes_introns	20133
AR_ctr	CD4 mem	chr10	129867928	129867928	1	10	64	Open Sea	NA	NA	NA	NA	0.0792082	0.146991	-0.0677832	-0.815437	3.85e-06	0.2	0	0.0769465	0.304348	0.0243902	0.0755723	0	0.00806031	1096183	0	0	23.2857	30.1111	5	10	45	48	6	18	chr10	129866551	129867955	1405	+	intron:321232	uc009yau.2	5791	PTPRE	hg19_genes_introns	20133
AR_ctr	CD4 mem	chr10	129867928	129867928	1	10	64	Open Sea	NA	NA	NA	NA	0.0792082	0.146991	-0.0677832	-0.815437	3.85e-06	0.2	0	0.0769465	0.304348	0.0243902	0.0755723	0	0.00806031	1096183	0	0	23.2857	30.1111	5	10	45	48	6	18	chr10	129866551	129867955	1405	+	intron:321255	uc001lkd.3	5791	PTPRE	hg19_genes_introns	20133
AR_ctr	CD4 mem	chr10	129867928	129867928	1	10	64	Open Sea	NA	NA	NA	NA	0.0792082	0.146991	-0.0677832	-0.815437	3.85e-06	0.2	0	0.0769465	0.304348	0.0243902	0.0755723	0	0.00806031	1096183	0	0	23.2857	30.1111	5	10	45	48	6	18	chr10	129866551	129867955	1405	+	intron:321270	uc010quq.1	5791	PTPRE	hg19_genes_introns	20133
AR_ctr	CD4 mem	chr10	129867928	129867928	1	10	64	Open Sea	NA	NA	NA	NA	0.0792082	0.146991	-0.0677832	-0.815437	3.85e-06	0.2	0	0.0769465	0.304348	0.0243902	0.0755723	0	0.00806031	1096183	0	0	23.2857	30.1111	5	10	45	48	6	18	chr10	129867756	129868155	400	+	intronexonboundary:335176	uc001lkb.3	5791	PTPRE	hg19_genes_intronexonboundaries	20133
AR_ctr	CD4 mem	chr10	129867928	129867928	1	10	64	Open Sea	NA	NA	NA	NA	0.0792082	0.146991	-0.0677832	-0.815437	3.85e-06	0.2	0	0.0769465	0.304348	0.0243902	0.0755723	0	0.00806031	1096183	0	0	23.2857	30.1111	5	10	45	48	6	18	chr10	129867756	129868155	400	+	intronexonboundary:335177	uc009yat.3	5791	PTPRE	hg19_genes_intronexonboundaries	20133
AR_ctr	CD4 mem	chr10	129867928	129867928	1	10	64	Open Sea	NA	NA	NA	NA	0.0792082	0.146991	-0.0677832	-0.815437	3.85e-06	0.2	0	0.0769465	0.304348	0.0243902	0.0755723	0	0.00806031	1096183	0	0	23.2857	30.1111	5	10	45	48	6	18	chr10	129867756	129868155	400	+	intronexonboundary:335178	uc009yau.2	5791	PTPRE	hg19_genes_intronexonboundaries	20133
AR_ctr	CD4 mem	chr10	129867928	129867928	1	10	64	Open Sea	NA	NA	NA	NA	0.0792082	0.146991	-0.0677832	-0.815437	3.85e-06	0.2	0	0.0769465	0.304348	0.0243902	0.0755723	0	0.00806031	1096183	0	0	23.2857	30.1111	5	10	45	48	6	18	chr10	129867756	129868155	400	+	intronexonboundary:335179	uc001lkd.3	5791	PTPRE	hg19_genes_intronexonboundaries	20133
AR_ctr	CD4 mem	chr10	129867928	129867928	1	10	64	Open Sea	NA	NA	NA	NA	0.0792082	0.146991	-0.0677832	-0.815437	3.85e-06	0.2	0	0.0769465	0.304348	0.0243902	0.0755723	0	0.00806031	1096183	0	0	23.2857	30.1111	5	10	45	48	6	18	chr10	129867756	129868155	400	+	intronexonboundary:335180	uc010quq.1	5791	PTPRE	hg19_genes_intronexonboundaries	20133
AR_ctr	CD4 mem	chr10	129867928	129867928	1	10	64	Open Sea	NA	NA	NA	NA	0.0792082	0.146991	-0.0677832	-0.815437	3.85e-06	0.2	0	0.0769465	0.304348	0.0243902	0.0755723	0	0.00806031	1096183	0	0	23.2857	30.1111	5	10	45	48	6	18	chr10	129867891	129868290	400	+	exonintronboundary:338750	uc001lkb.3	5791	PTPRE	hg19_genes_exonintronboundaries	20133
AR_ctr	CD4 mem	chr10	129867928	129867928	1	10	64	Open Sea	NA	NA	NA	NA	0.0792082	0.146991	-0.0677832	-0.815437	3.85e-06	0.2	0	0.0769465	0.304348	0.0243902	0.0755723	0	0.00806031	1096183	0	0	23.2857	30.1111	5	10	45	48	6	18	chr10	129867891	129868290	400	+	exonintronboundary:338751	uc009yat.3	5791	PTPRE	hg19_genes_exonintronboundaries	20133
AR_ctr	CD4 mem	chr10	129867928	129867928	1	10	64	Open Sea	NA	NA	NA	NA	0.0792082	0.146991	-0.0677832	-0.815437	3.85e-06	0.2	0	0.0769465	0.304348	0.0243902	0.0755723	0	0.00806031	1096183	0	0	23.2857	30.1111	5	10	45	48	6	18	chr10	129867891	129868290	400	+	exonintronboundary:338752	uc009yau.2	5791	PTPRE	hg19_genes_exonintronboundaries	20133
AR_ctr	CD4 mem	chr10	129867928	129867928	1	10	64	Open Sea	NA	NA	NA	NA	0.0792082	0.146991	-0.0677832	-0.815437	3.85e-06	0.2	0	0.0769465	0.304348	0.0243902	0.0755723	0	0.00806031	1096183	0	0	23.2857	30.1111	5	10	45	48	6	18	chr10	129867891	129868290	400	+	exonintronboundary:338753	uc001lkd.3	5791	PTPRE	hg19_genes_exonintronboundaries	20133
AR_ctr	CD4 mem	chr10	129867928	129867928	1	10	64	Open Sea	NA	NA	NA	NA	0.0792082	0.146991	-0.0677832	-0.815437	3.85e-06	0.2	0	0.0769465	0.304348	0.0243902	0.0755723	0	0.00806031	1096183	0	0	23.2857	30.1111	5	10	45	48	6	18	chr10	129867891	129868290	400	+	exonintronboundary:338754	uc010quq.1	5791	PTPRE	hg19_genes_exonintronboundaries	20133
AR_ctr	CD4 mem	chr10	129867928	129867928	1	10	64	Open Sea	NA	NA	NA	NA	0.0792082	0.146991	-0.0677832	-0.815437	3.85e-06	0.2	0	0.0769465	0.304348	0.0243902	0.0755723	0	0.00806031	1096183	0	0	23.2857	30.1111	5	10	45	48	6	18	chr10	129710238	129919813	209576	*	inter:10288	NA	NA	NA	hg19_cpg_inter	20133
AR_ctr	CD4 mem	chr9	127616547	127616547	1	2	64	Open Sea	NA	NA	NA	NA	0.913612	0.804438	0.109174	0.181482	3.89e-06	1	0.76	0.0821944	0.925926	0.548387	0.0995533	0	0.00812857	1337456	0	0	23.1429	30.5	10	14	36	63	7	18	chr9	127616484	127616604	121	+	CDS:261480	uc004box.4	401551	WDR38	hg19_genes_cds	850
AR_ctr	CD4 mem	chr9	127616547	127616547	1	2	64	Open Sea	NA	NA	NA	NA	0.913612	0.804438	0.109174	0.181482	3.89e-06	1	0.76	0.0821944	0.925926	0.548387	0.0995533	0	0.00812857	1337456	0	0	23.1429	30.5	10	14	36	63	7	18	chr9	127616517	127616604	88	+	CDS:261489	uc011lzn.3	401551	WDR38	hg19_genes_cds	850
AR_ctr	CD4 mem	chr9	127616547	127616547	1	2	64	Open Sea	NA	NA	NA	NA	0.913612	0.804438	0.109174	0.181482	3.89e-06	1	0.76	0.0821944	0.925926	0.548387	0.0995533	0	0.00812857	1337456	0	0	23.1429	30.5	10	14	36	63	7	18	chr9	127616484	127616604	121	+	CDS:261498	uc011lzo.3	401551	WDR38	hg19_genes_cds	850
AR_ctr	CD4 mem	chr9	127616547	127616547	1	2	64	Open Sea	NA	NA	NA	NA	0.913612	0.804438	0.109174	0.181482	3.89e-06	1	0.76	0.0821944	0.925926	0.548387	0.0995533	0	0.00812857	1337456	0	0	23.1429	30.5	10	14	36	63	7	18	chr9	127616509	127616604	96	+	CDS:261506	uc011lzp.3	401551	WDR38	hg19_genes_cds	850
AR_ctr	CD4 mem	chr9	127616547	127616547	1	2	64	Open Sea	NA	NA	NA	NA	0.913612	0.804438	0.109174	0.181482	3.89e-06	1	0.76	0.0821944	0.925926	0.548387	0.0995533	0	0.00812857	1337456	0	0	23.1429	30.5	10	14	36	63	7	18	chr9	127616484	127616604	121	+	exon:325458	uc004box.4	401551	WDR38	hg19_genes_exons	850
AR_ctr	CD4 mem	chr9	127616547	127616547	1	2	64	Open Sea	NA	NA	NA	NA	0.913612	0.804438	0.109174	0.181482	3.89e-06	1	0.76	0.0821944	0.925926	0.548387	0.0995533	0	0.00812857	1337456	0	0	23.1429	30.5	10	14	36	63	7	18	chr9	127616517	127616604	88	+	exon:325467	uc011lzn.3	401551	WDR38	hg19_genes_exons	850
AR_ctr	CD4 mem	chr9	127616547	127616547	1	2	64	Open Sea	NA	NA	NA	NA	0.913612	0.804438	0.109174	0.181482	3.89e-06	1	0.76	0.0821944	0.925926	0.548387	0.0995533	0	0.00812857	1337456	0	0	23.1429	30.5	10	14	36	63	7	18	chr9	127616484	127616604	121	+	exon:325476	uc011lzo.3	401551	WDR38	hg19_genes_exons	850
AR_ctr	CD4 mem	chr9	127616547	127616547	1	2	64	Open Sea	NA	NA	NA	NA	0.913612	0.804438	0.109174	0.181482	3.89e-06	1	0.76	0.0821944	0.925926	0.548387	0.0995533	0	0.00812857	1337456	0	0	23.1429	30.5	10	14	36	63	7	18	chr9	127616484	127616604	121	+	exon:325485	uc011lzp.3	401551	WDR38	hg19_genes_exons	850
AR_ctr	CD4 mem	chr9	127616547	127616547	1	2	64	Open Sea	NA	NA	NA	NA	0.913612	0.804438	0.109174	0.181482	3.89e-06	1	0.76	0.0821944	0.925926	0.548387	0.0995533	0	0.00812857	1337456	0	0	23.1429	30.5	10	14	36	63	7	18	chr9	127616284	127616683	400	+	intronexonboundary:302667	uc004box.4	401551	WDR38	hg19_genes_intronexonboundaries	850
AR_ctr	CD4 mem	chr9	127616547	127616547	1	2	64	Open Sea	NA	NA	NA	NA	0.913612	0.804438	0.109174	0.181482	3.89e-06	1	0.76	0.0821944	0.925926	0.548387	0.0995533	0	0.00812857	1337456	0	0	23.1429	30.5	10	14	36	63	7	18	chr9	127616284	127616683	400	+	intronexonboundary:302668	uc011lzo.3	401551	WDR38	hg19_genes_intronexonboundaries	850
AR_ctr	CD4 mem	chr9	127616547	127616547	1	2	64	Open Sea	NA	NA	NA	NA	0.913612	0.804438	0.109174	0.181482	3.89e-06	1	0.76	0.0821944	0.925926	0.548387	0.0995533	0	0.00812857	1337456	0	0	23.1429	30.5	10	14	36	63	7	18	chr9	127616284	127616683	400	+	intronexonboundary:302669	uc011lzp.3	401551	WDR38	hg19_genes_intronexonboundaries	850
AR_ctr	CD4 mem	chr9	127616547	127616547	1	2	64	Open Sea	NA	NA	NA	NA	0.913612	0.804438	0.109174	0.181482	3.89e-06	1	0.76	0.0821944	0.925926	0.548387	0.0995533	0	0.00812857	1337456	0	0	23.1429	30.5	10	14	36	63	7	18	chr9	127616317	127616716	400	+	intronexonboundary:302670	uc011lzn.3	401551	WDR38	hg19_genes_intronexonboundaries	850
AR_ctr	CD4 mem	chr9	127616547	127616547	1	2	64	Open Sea	NA	NA	NA	NA	0.913612	0.804438	0.109174	0.181482	3.89e-06	1	0.76	0.0821944	0.925926	0.548387	0.0995533	0	0.00812857	1337456	0	0	23.1429	30.5	10	14	36	63	7	18	chr9	127616404	127616803	400	+	exonintronboundary:305829	uc004box.4	401551	WDR38	hg19_genes_exonintronboundaries	850
AR_ctr	CD4 mem	chr9	127616547	127616547	1	2	64	Open Sea	NA	NA	NA	NA	0.913612	0.804438	0.109174	0.181482	3.89e-06	1	0.76	0.0821944	0.925926	0.548387	0.0995533	0	0.00812857	1337456	0	0	23.1429	30.5	10	14	36	63	7	18	chr9	127616404	127616803	400	+	exonintronboundary:305830	uc011lzn.3	401551	WDR38	hg19_genes_exonintronboundaries	850
AR_ctr	CD4 mem	chr9	127616547	127616547	1	2	64	Open Sea	NA	NA	NA	NA	0.913612	0.804438	0.109174	0.181482	3.89e-06	1	0.76	0.0821944	0.925926	0.548387	0.0995533	0	0.00812857	1337456	0	0	23.1429	30.5	10	14	36	63	7	18	chr9	127616404	127616803	400	+	exonintronboundary:305831	uc011lzo.3	401551	WDR38	hg19_genes_exonintronboundaries	850
AR_ctr	CD4 mem	chr9	127616547	127616547	1	2	64	Open Sea	NA	NA	NA	NA	0.913612	0.804438	0.109174	0.181482	3.89e-06	1	0.76	0.0821944	0.925926	0.548387	0.0995533	0	0.00812857	1337456	0	0	23.1429	30.5	10	14	36	63	7	18	chr9	127616404	127616803	400	+	exonintronboundary:305832	uc011lzp.3	401551	WDR38	hg19_genes_exonintronboundaries	850
AR_ctr	CD4 mem	chr9	127616547	127616547	1	2	64	Open Sea	NA	NA	NA	NA	0.913612	0.804438	0.109174	0.181482	3.89e-06	1	0.76	0.0821944	0.925926	0.548387	0.0995533	0	0.00812857	1337456	0	0	23.1429	30.5	10	14	36	63	7	18	chr9	127615875	127617874	2000	*	shore:22292	NA	NA	NA	hg19_cpg_shores	850
AR_ctr	CD4 mem	chr10	128615522	128615522	1	2	46	Open Sea	NA	NA	NA	NA	0.907516	0.875404	0.032112	0.0513974	3.97e-06	1	0.772277	0.0830549	0.967213	0.702703	0.0750945	0	0.00826469	2424133	0	0	56.2857	78.6667	4	23	101	148	6	18	chr10	128594133	128768965	174833	+	intron:321043	uc001ljt.3	1793	DOCK1	hg19_genes_introns	6145
AR_ctr	CD4 mem	chr10	128615522	128615522	1	2	46	Open Sea	NA	NA	NA	NA	0.907516	0.875404	0.032112	0.0513974	3.97e-06	1	0.772277	0.0830549	0.967213	0.702703	0.0750945	0	0.00826469	2424133	0	0	56.2857	78.6667	4	23	101	148	6	18	chr10	128594133	128768965	174833	+	intron:321094	uc010qun.2	1793	DOCK1	hg19_genes_introns	6145
AR_ctr	CD4 mem	chr10	128615522	128615522	1	2	46	Open Sea	NA	NA	NA	NA	0.907516	0.875404	0.032112	0.0513974	3.97e-06	1	0.772277	0.0830549	0.967213	0.702703	0.0750945	0	0.00826469	2424133	0	0	56.2857	78.6667	4	23	101	148	6	18	chr10	128599049	128969590	370542	*	inter:10283	NA	NA	NA	hg19_cpg_inter	6145
AR_ctr	CD4 mem	chr2	70324036	70324036	1	5	49	Open Sea	NA	NA	NA	NA	0.557995	0.735881	-0.177886	-0.393068	3.97e-06	0.714286	0	0.255611	1	0.222222	0.200276	0	0.00827307	802402	0	0	13.5714	11.1667	2	3	24	20	5	11	chr2	70319148	70351167	32020	*	intergenic:1952	NA	NA	NA	hg19_genes_intergenic	9450
AR_ctr	CD4 mem	chr2	70324036	70324036	1	5	49	Open Sea	NA	NA	NA	NA	0.557995	0.735881	-0.177886	-0.393068	3.97e-06	0.714286	0	0.255611	1	0.222222	0.200276	0	0.00827307	802402	0	0	13.5714	11.1667	2	3	24	20	5	11	chr2	70319491	70347315	27825	*	inter:2253	NA	NA	NA	hg19_cpg_inter	9450
AR_ctr	CD4 mem	chr2	209909547	209909547	1	4	59	Open Sea	NA	NA	NA	NA	0.763709	0.640029	0.123679	0.251285	4.01e-06	1	0.444444	0.209509	0.769231	0.333333	0.109338	0	0.00832899	1088993	0	0	10.1429	13.7778	1	6	15	24	5	14	chr2	209704819	210283770	578952	*	intergenic:2574	NA	NA	NA	hg19_genes_intergenic	379222
AR_ctr	CD4 mem	chr2	209909547	209909547	1	4	59	Open Sea	NA	NA	NA	NA	0.763709	0.640029	0.123679	0.251285	4.01e-06	1	0.444444	0.209509	0.769231	0.333333	0.109338	0	0.00832899	1088993	0	0	10.1429	13.7778	1	6	15	24	5	14	chr2	209275988	210006093	730106	*	inter:2916	NA	NA	NA	hg19_cpg_inter	379222
AR_ctr	CD4 mem	chr14	54184500	54184500	1	3	49	Open Sea	NA	NA	NA	NA	0.882728	0.869617	0.0131109	0.021345	4.01e-06	1	0.6	0.137125	0.947368	0.77551	0.0574701	0	0.00832899	2967787	0	0	24.5714	29.2222	10	9	34	50	7	17	chr14	53625047	54415144	790098	*	intergenic:11172	NA	NA	NA	hg19_genes_intergenic	679171
AR_ctr	CD4 mem	chr14	54184500	54184500	1	3	49	Open Sea	NA	NA	NA	NA	0.882728	0.869617	0.0131109	0.021345	4.01e-06	1	0.6	0.137125	0.947368	0.77551	0.0574701	0	0.00832899	2967787	0	0	24.5714	29.2222	10	9	34	50	7	17	chr14	53624040	54409304	785265	*	inter:12888	NA	NA	NA	hg19_cpg_inter	679171
AR_ctr	CD4 mem	chr6	55964118	55964118	1	7	66	Open Sea	NA	NA	NA	NA	0.868767	0.758534	0.110232	0.19337	4.08e-06	1	0.666667	0.121228	0.9	0.571429	0.078947	0	0.00846922	1285514	0	0	17.7143	20.1667	9	12	30	34	6	18	chr6	55942372	55966269	23898	-	intron:223290	uc010jzz.3	81578	COL21A1	hg19_genes_introns	771850
AR_ctr	CD4 mem	chr6	55964118	55964118	1	7	66	Open Sea	NA	NA	NA	NA	0.868767	0.758534	0.110232	0.19337	4.08e-06	1	0.666667	0.121228	0.9	0.571429	0.078947	0	0.00846922	1285514	0	0	17.7143	20.1667	9	12	30	34	6	18	chr6	55942372	55966269	23898	-	intron:223305	uc011dxg.2	81578	COL21A1	hg19_genes_introns	771850
AR_ctr	CD4 mem	chr6	55964118	55964118	1	7	66	Open Sea	NA	NA	NA	NA	0.868767	0.758534	0.110232	0.19337	4.08e-06	1	0.666667	0.121228	0.9	0.571429	0.078947	0	0.00846922	1285514	0	0	17.7143	20.1667	9	12	30	34	6	18	chr6	55942987	55966269	23283	-	intron:223322	uc011dxh.3	81578	COL21A1	hg19_genes_introns	771850
AR_ctr	CD4 mem	chr6	55964118	55964118	1	7	66	Open Sea	NA	NA	NA	NA	0.868767	0.758534	0.110232	0.19337	4.08e-06	1	0.666667	0.121228	0.9	0.571429	0.078947	0	0.00846922	1285514	0	0	17.7143	20.1667	9	12	30	34	6	18	chr6	55942372	55966269	23898	-	intron:223337	uc003pcs.3	81578	COL21A1	hg19_genes_introns	771850
AR_ctr	CD4 mem	chr6	55964118	55964118	1	7	66	Open Sea	NA	NA	NA	NA	0.868767	0.758534	0.110232	0.19337	4.08e-06	1	0.666667	0.121228	0.9	0.571429	0.078947	0	0.00846922	1285514	0	0	17.7143	20.1667	9	12	30	34	6	18	chr6	55448093	56108188	660096	*	inter:6255	NA	NA	NA	hg19_cpg_inter	771850
AR_ctr	CD4 mem	chr1	149616125	149616125	1	6	71	Island	NA	NA	NA	NA	0.131028	0.273078	-0.14205	-1.00522	4.12e-06	0.285714	0	0.102872	0.444444	0.111111	0.0976959	0	0.00854096	389163	0	0	16.2857	24.6111	3	6	31	39	5	17	chr1	149615691	149616690	1000	-	promoter:6248	uc021oxr.1	NA	NA	hg19_genes_promoters	7515
AR_ctr	CD4 mem	chr1	149616125	149616125	1	6	71	Island	NA	NA	NA	NA	0.131028	0.273078	-0.14205	-1.00522	4.12e-06	0.285714	0	0.102872	0.444444	0.111111	0.0976959	0	0.00854096	389163	0	0	16.2857	24.6111	3	6	31	39	5	17	chr1	149615765	149616786	1022	+	exon:22070	uc001esk.5	728855	LINC00623	hg19_genes_exons	7515
AR_ctr	CD4 mem	chr1	149616125	149616125	1	6	71	Island	NA	NA	NA	NA	0.131028	0.273078	-0.14205	-1.00522	4.12e-06	0.285714	0	0.102872	0.444444	0.111111	0.0976959	0	0.00854096	389163	0	0	16.2857	24.6111	3	6	31	39	5	17	chr1	149616112	149616545	434	+	intron:19752	uc001esl.5	728855	LINC00623	hg19_genes_introns	7515
AR_ctr	CD4 mem	chr1	149616125	149616125	1	6	71	Island	NA	NA	NA	NA	0.131028	0.273078	-0.14205	-1.00522	4.12e-06	0.285714	0	0.102872	0.444444	0.111111	0.0976959	0	0.00854096	389163	0	0	16.2857	24.6111	3	6	31	39	5	17	chr1	149577663	149670208	92546	+	intron:19754	uc009wlc.3	57234	LINC00869	hg19_genes_introns	7515
AR_ctr	CD4 mem	chr1	149616125	149616125	1	6	71	Island	NA	NA	NA	NA	0.131028	0.273078	-0.14205	-1.00522	4.12e-06	0.285714	0	0.102872	0.444444	0.111111	0.0976959	0	0.00854096	389163	0	0	16.2857	24.6111	3	6	31	39	5	17	chr1	149576701	149670208	93508	+	intron:19756	uc009wld.3	57234	LINC00869	hg19_genes_introns	7515
AR_ctr	CD4 mem	chr1	149616125	149616125	1	6	71	Island	NA	NA	NA	NA	0.131028	0.273078	-0.14205	-1.00522	4.12e-06	0.285714	0	0.102872	0.444444	0.111111	0.0976959	0	0.00854096	389163	0	0	16.2857	24.6111	3	6	31	39	5	17	chr1	149576701	149670208	93508	+	intron:19758	uc031poo.1	57234	LINC00869	hg19_genes_introns	7515
AR_ctr	CD4 mem	chr1	149616125	149616125	1	6	71	Island	NA	NA	NA	NA	0.131028	0.273078	-0.14205	-1.00522	4.12e-06	0.285714	0	0.102872	0.444444	0.111111	0.0976959	0	0.00854096	389163	0	0	16.2857	24.6111	3	6	31	39	5	17	chr1	149576701	149671771	95071	+	intron:19761	uc031pop.1	57234	LINC00869	hg19_genes_introns	7515
AR_ctr	CD4 mem	chr1	149616125	149616125	1	6	71	Island	NA	NA	NA	NA	0.131028	0.273078	-0.14205	-1.00522	4.12e-06	0.285714	0	0.102872	0.444444	0.111111	0.0976959	0	0.00854096	389163	0	0	16.2857	24.6111	3	6	31	39	5	17	chr1	149615911	149616310	400	+	exonintronboundary:22077	uc001esl.5	728855	LINC00623	hg19_genes_exonintronboundaries	7515
AR_ctr	CD4 mem	chr1	149616125	149616125	1	6	71	Island	NA	NA	NA	NA	0.131028	0.273078	-0.14205	-1.00522	4.12e-06	0.285714	0	0.102872	0.444444	0.111111	0.0976959	0	0.00854096	389163	0	0	16.2857	24.6111	3	6	31	39	5	17	chr1	149615819	149616407	589	*	island:1636	NA	NA	NA	hg19_cpg_islands	7515
AR_ctr	CD4 mem	chr7	98120656	98120656	1	2	65	Open Sea	NA	NA	NA	NA	0.775595	0.728288	0.0473071	0.0896021	4.15e-06	1	0.35	0.236149	0.970588	0.333333	0.167493	0	0.00858283	1955594	0	1	12	16.6111	5	0	20	34	5	14	chr7	98035428	98241596	206169	*	intergenic:6517	NA	NA	NA	hg19_genes_intergenic	125939
AR_ctr	CD4 mem	chr7	98120656	98120656	1	2	65	Open Sea	NA	NA	NA	NA	0.775595	0.728288	0.0473071	0.0896021	4.15e-06	1	0.35	0.236149	0.970588	0.333333	0.167493	0	0.00858283	1955594	0	1	12	16.6111	5	0	20	34	5	14	chr7	98104290	98241805	137516	*	inter:7403	NA	NA	NA	hg19_cpg_inter	125939
AR_ctr	CD4 mem	chr17	42205271	42205271	1	5	53	Open Sea	NA	NA	NA	NA	0.851892	0.751114	0.100778	0.179394	4.17e-06	1	0.68	0.129965	0.916667	0.409091	0.148926	0	0.00863451	1346358	0	0	19.4286	19.6667	6	8	31	31	6	17	chr17	42201644	42205643	4000	-	1to5kb:63658	uc002ifd.1	10014	HDAC5	hg19_genes_1to5kb	14001
AR_ctr	CD4 mem	chr17	42205271	42205271	1	5	53	Open Sea	NA	NA	NA	NA	0.851892	0.751114	0.100778	0.179394	4.17e-06	1	0.68	0.129965	0.916667	0.409091	0.148926	0	0.00863451	1346358	0	0	19.4286	19.6667	6	8	31	31	6	17	chr17	42202015	42206014	4000	-	1to5kb:63659	uc002ife.1	10014	HDAC5	hg19_genes_1to5kb	14001
AR_ctr	CD4 mem	chr17	42205271	42205271	1	5	53	Open Sea	NA	NA	NA	NA	0.851892	0.751114	0.100778	0.179394	4.17e-06	1	0.68	0.129965	0.916667	0.409091	0.148926	0	0.00863451	1346358	0	0	19.4286	19.6667	6	8	31	31	6	17	chr17	42202015	42206014	4000	-	1to5kb:63660	uc002iff.1	10014	HDAC5	hg19_genes_1to5kb	14001
AR_ctr	CD4 mem	chr17	42205271	42205271	1	5	53	Open Sea	NA	NA	NA	NA	0.851892	0.751114	0.100778	0.179394	4.17e-06	1	0.68	0.129965	0.916667	0.409091	0.148926	0	0.00863451	1346358	0	0	19.4286	19.6667	6	8	31	31	6	17	chr17	42202015	42206014	4000	-	1to5kb:63661	uc010czp.1	10014	HDAC5	hg19_genes_1to5kb	14001
AR_ctr	CD4 mem	chr17	42205271	42205271	1	5	53	Open Sea	NA	NA	NA	NA	0.851892	0.751114	0.100778	0.179394	4.17e-06	1	0.68	0.129965	0.916667	0.409091	0.148926	0	0.00863451	1346358	0	0	19.4286	19.6667	6	8	31	31	6	17	chr17	42202015	42206014	4000	-	1to5kb:63663	uc002ifh.2	10014	HDAC5	hg19_genes_1to5kb	14001
AR_ctr	CD4 mem	chr17	42205271	42205271	1	5	53	Open Sea	NA	NA	NA	NA	0.851892	0.751114	0.100778	0.179394	4.17e-06	1	0.68	0.129965	0.916667	0.409091	0.148926	0	0.00863451	1346358	0	0	19.4286	19.6667	6	8	31	31	6	17	chr17	42203544	42205543	2000	*	shelf:32645	NA	NA	NA	hg19_cpg_shelves	14001
AR_ctr	CD4 mem	chr13	111998462	111998462	1	3	56	Open Sea	NA	NA	NA	NA	0.81688	0.798712	0.0181675	0.0320511	4.18e-06	1	0.347826	0.227103	0.954545	0.666667	0.0808718	0	0.00863542	2753468	0	0	27.4286	31.7778	3	5	51	59	6	17	chr13	111996595	112716912	720318	*	intergenic:10964	NA	NA	NA	hg19_genes_intergenic	25446
AR_ctr	CD4 mem	chr13	111998462	111998462	1	3	56	Open Sea	NA	NA	NA	NA	0.81688	0.798712	0.0181675	0.0320511	4.18e-06	1	0.347826	0.227103	0.954545	0.666667	0.0808718	0	0.00863542	2753468	0	0	27.4286	31.7778	3	5	51	59	6	17	chr13	111983100	112050425	67326	*	inter:12634	NA	NA	NA	hg19_cpg_inter	25446
AR_ctr	CD4 mem	chr1	228765872	228765872	1	9	68	Island	NA	NA	NA	NA	0.854739	0.752574	0.102165	0.181387	4.22e-06	1	0.75	0.102996	0.869565	0.333333	0.133641	0	0.00870031	1337885	0	0	28.8571	25.5	4	3	56	69	6	15	chr1	228683890	228775393	91504	*	intergenic:1513	NA	NA	NA	hg19_genes_intergenic	14520
AR_ctr	CD4 mem	chr1	228765872	228765872	1	9	68	Island	NA	NA	NA	NA	0.854739	0.752574	0.102165	0.181387	4.22e-06	1	0.75	0.102996	0.869565	0.333333	0.133641	0	0.00870031	1337885	0	0	28.8571	25.5	4	3	56	69	6	15	chr1	228744111	228784168	40058	*	island:2319	NA	NA	NA	hg19_cpg_islands	14520
AR_ctr	CD4 mem	chr19	54792700	54792700	1	3	56	Open Sea	NA	NA	NA	NA	0.915339	0.883217	0.0321221	0.0509714	4.22e-06	1	0.8	0.0762432	0.977778	0.765625	0.060178	0	0.00870031	2430368	0	0	54.8571	65.7222	36	18	75	110	7	18	chr19	54746407	54804139	57733	-	intron:566326	uc002qew.2	79168	LILRA6	hg19_genes_introns	6735
AR_ctr	CD4 mem	chr19	54792700	54792700	1	3	56	Open Sea	NA	NA	NA	NA	0.915339	0.883217	0.0321221	0.0509714	4.22e-06	1	0.8	0.0762432	0.977778	0.765625	0.060178	0	0.00870031	2430368	0	0	54.8571	65.7222	36	18	75	110	7	18	chr19	54715376	54923902	208527	*	inter:17606	NA	NA	NA	hg19_cpg_inter	6735
AR_ctr	CD4 mem	chr4	84047192	84047192	1	2	54	Open Sea	NA	NA	NA	NA	0.133271	0.261415	-0.128144	-0.921757	4.3e-06	0.230769	0	0.1101	0.666667	0.0714286	0.13865	0	0.00886403	466673	0	0	19.2857	29.2222	9	3	45	53	6	17	chr4	84040912	84182688	141777	*	intergenic:4011	NA	NA	NA	hg19_genes_intergenic	90952
AR_ctr	CD4 mem	chr4	84047192	84047192	1	2	54	Open Sea	NA	NA	NA	NA	0.133271	0.261415	-0.128144	-0.921757	4.3e-06	0.230769	0	0.1101	0.666667	0.0714286	0.13865	0	0.00886403	466673	0	0	19.2857	29.2222	9	3	45	53	6	17	chr4	84035310	84201381	166072	*	inter:4573	NA	NA	NA	hg19_cpg_inter	90952
AR_ctr	CD4 mem	chr20	3759137	3759137	1	11	68	Island	NA	NA	NA	NA	0.0654932	0.214337	-0.148844	-1.57125	4.33e-06	0.137931	0	0.0511439	0.428571	0.04	0.124089	0	0.00890987	355746	0	0	24.8571	27.6111	3	5	58	50	6	17	chr20	3759068	3759191	124	-	CDS:516913	uc002wjj.3	25876	SPEF1	hg19_genes_cds	8439
AR_ctr	CD4 mem	chr20	3759137	3759137	1	11	68	Island	NA	NA	NA	NA	0.0654932	0.214337	-0.148844	-1.57125	4.33e-06	0.137931	0	0.0511439	0.428571	0.04	0.124089	0	0.00890987	355746	0	0	24.8571	27.6111	3	5	58	50	6	17	chr20	3759068	3759191	124	-	exon:648310	uc002wjj.3	25876	SPEF1	hg19_genes_exons	8439
AR_ctr	CD4 mem	chr20	3759137	3759137	1	11	68	Island	NA	NA	NA	NA	0.0654932	0.214337	-0.148844	-1.57125	4.33e-06	0.137931	0	0.0511439	0.428571	0.04	0.124089	0	0.00890987	355746	0	0	24.8571	27.6111	3	5	58	50	6	17	chr20	3758767	3759166	400	-	intronexonboundary:603350	uc002wjj.3	25876	SPEF1	hg19_genes_intronexonboundaries	8439
AR_ctr	CD4 mem	chr20	3759137	3759137	1	11	68	Island	NA	NA	NA	NA	0.0654932	0.214337	-0.148844	-1.57125	4.33e-06	0.137931	0	0.0511439	0.428571	0.04	0.124089	0	0.00890987	355746	0	0	24.8571	27.6111	3	5	58	50	6	17	chr20	3758992	3759391	400	-	intronexonboundary:603351	uc002wjj.3	25876	SPEF1	hg19_genes_intronexonboundaries	8439
AR_ctr	CD4 mem	chr20	3759137	3759137	1	11	68	Island	NA	NA	NA	NA	0.0654932	0.214337	-0.148844	-1.57125	4.33e-06	0.137931	0	0.0511439	0.428571	0.04	0.124089	0	0.00890987	355746	0	0	24.8571	27.6111	3	5	58	50	6	17	chr20	3758869	3759268	400	-	exonintronboundary:607830	uc002wjj.3	25876	SPEF1	hg19_genes_exonintronboundaries	8439
AR_ctr	CD4 mem	chr20	3759137	3759137	1	11	68	Island	NA	NA	NA	NA	0.0654932	0.214337	-0.148844	-1.57125	4.33e-06	0.137931	0	0.0511439	0.428571	0.04	0.124089	0	0.00890987	355746	0	0	24.8571	27.6111	3	5	58	50	6	17	chr20	3758207	3759184	978	*	island:24844	NA	NA	NA	hg19_cpg_islands	8439
AR_ctr	CD4 mem	chr7	12281924	12281924	1	8	65	Open Sea	NA	NA	NA	NA	0.974624	0.892873	0.0817508	0.125049	4.46e-06	1	0.875	0.0481101	1	0.6	0.0960787	0	0.00913171	1654421	0	0	14.1429	17.5	2	11	32	25	5	18	chr7	12276891	12370508	93618	*	intergenic:6134	NA	NA	NA	hg19_genes_intergenic	31075
AR_ctr	CD4 mem	chr7	12281924	12281924	1	8	65	Open Sea	NA	NA	NA	NA	0.974624	0.892873	0.0817508	0.125049	4.46e-06	1	0.875	0.0481101	1	0.6	0.0960787	0	0.00913171	1654421	0	0	14.1429	17.5	2	11	32	25	5	18	chr7	12255215	12439163	183949	*	inter:6943	NA	NA	NA	hg19_cpg_inter	31075
AR_ctr	CD4 mem	chr10	431132	431132	1	6	70	Open Sea	NA	NA	NA	NA	1	0.896063	0.103937	0.156672	4.46e-06	1	1	0	1	0.75	0.0657361	0	0.00914385	1458262	0	0	13.7143	16.8333	4	4	27	32	5	15	chr10	430580	433684	3105	-	intron:321758	uc001ifp.3	22982	DIP2C	hg19_genes_introns	175302
AR_ctr	CD4 mem	chr10	431132	431132	1	6	70	Open Sea	NA	NA	NA	NA	1	0.896063	0.103937	0.156672	4.46e-06	1	1	0	1	0.75	0.0657361	0	0.00914385	1458262	0	0	13.7143	16.8333	4	4	27	32	5	15	chr10	430580	433684	3105	-	intron:321793	uc009xhj.1	22982	DIP2C	hg19_genes_introns	175302
AR_ctr	CD4 mem	chr10	431132	431132	1	6	70	Open Sea	NA	NA	NA	NA	1	0.896063	0.103937	0.156672	4.46e-06	1	1	0	1	0.75	0.0657361	0	0.00914385	1458262	0	0	13.7143	16.8333	4	4	27	32	5	15	chr10	426412	440909	14498	*	inter:9512	NA	NA	NA	hg19_cpg_inter	175302
AR_ctr	CD4 mem	chr17	40125572	40125572	1	5	60	Open Sea	NA	NA	NA	NA	0.901361	0.835989	0.0653718	0.107383	4.5e-06	1	0.758621	0.0841389	0.952381	0.692308	0.087697	0	0.00921638	1793452	0	0	30.4286	31.2778	2	17	47	52	6	18	chr17	40125493	40125942	450	+	CDS:444077	uc002hyl.1	1267	CNP	hg19_genes_cds	5177
AR_ctr	CD4 mem	chr17	40125572	40125572	1	5	60	Open Sea	NA	NA	NA	NA	0.901361	0.835989	0.0653718	0.107383	4.5e-06	1	0.758621	0.0841389	0.952381	0.692308	0.087697	0	0.00921638	1793452	0	0	30.4286	31.2778	2	17	47	52	6	18	chr17	40125493	40125942	450	+	CDS:444080	uc002hym.1	1267	CNP	hg19_genes_cds	5177
AR_ctr	CD4 mem	chr17	40125572	40125572	1	5	60	Open Sea	NA	NA	NA	NA	0.901361	0.835989	0.0653718	0.107383	4.5e-06	1	0.758621	0.0841389	0.952381	0.692308	0.087697	0	0.00921638	1793452	0	0	30.4286	31.2778	2	17	47	52	6	18	chr17	40125493	40125942	450	+	CDS:444085	uc010wfz.1	1267	CNP	hg19_genes_cds	5177
AR_ctr	CD4 mem	chr17	40125572	40125572	1	5	60	Open Sea	NA	NA	NA	NA	0.901361	0.835989	0.0653718	0.107383	4.5e-06	1	0.758621	0.0841389	0.952381	0.692308	0.087697	0	0.00921638	1793452	0	0	30.4286	31.2778	2	17	47	52	6	18	chr17	40125493	40125942	450	+	CDS:444087	uc010wga.1	1267	CNP	hg19_genes_cds	5177
AR_ctr	CD4 mem	chr17	40125572	40125572	1	5	60	Open Sea	NA	NA	NA	NA	0.901361	0.835989	0.0653718	0.107383	4.5e-06	1	0.758621	0.0841389	0.952381	0.692308	0.087697	0	0.00921638	1793452	0	0	30.4286	31.2778	2	17	47	52	6	18	chr17	40125493	40129754	4262	+	exon:558586	uc002hyl.1	1267	CNP	hg19_genes_exons	5177
AR_ctr	CD4 mem	chr17	40125572	40125572	1	5	60	Open Sea	NA	NA	NA	NA	0.901361	0.835989	0.0653718	0.107383	4.5e-06	1	0.758621	0.0841389	0.952381	0.692308	0.087697	0	0.00921638	1793452	0	0	30.4286	31.2778	2	17	47	52	6	18	chr17	40125493	40129754	4262	+	exon:558590	uc002hym.1	1267	CNP	hg19_genes_exons	5177
AR_ctr	CD4 mem	chr17	40125572	40125572	1	5	60	Open Sea	NA	NA	NA	NA	0.901361	0.835989	0.0653718	0.107383	4.5e-06	1	0.758621	0.0841389	0.952381	0.692308	0.087697	0	0.00921638	1793452	0	0	30.4286	31.2778	2	17	47	52	6	18	chr17	40125493	40129754	4262	+	exon:558595	uc010wfz.1	1267	CNP	hg19_genes_exons	5177
AR_ctr	CD4 mem	chr17	40125572	40125572	1	5	60	Open Sea	NA	NA	NA	NA	0.901361	0.835989	0.0653718	0.107383	4.5e-06	1	0.758621	0.0841389	0.952381	0.692308	0.087697	0	0.00921638	1793452	0	0	30.4286	31.2778	2	17	47	52	6	18	chr17	40125493	40129754	4262	+	exon:558598	uc010wga.1	1267	CNP	hg19_genes_exons	5177
AR_ctr	CD4 mem	chr17	40125572	40125572	1	5	60	Open Sea	NA	NA	NA	NA	0.901361	0.835989	0.0653718	0.107383	4.5e-06	1	0.758621	0.0841389	0.952381	0.692308	0.087697	0	0.00921638	1793452	0	0	30.4286	31.2778	2	17	47	52	6	18	chr17	40125293	40125692	400	+	intronexonboundary:519766	uc002hyl.1	1267	CNP	hg19_genes_intronexonboundaries	5177
AR_ctr	CD4 mem	chr17	40125572	40125572	1	5	60	Open Sea	NA	NA	NA	NA	0.901361	0.835989	0.0653718	0.107383	4.5e-06	1	0.758621	0.0841389	0.952381	0.692308	0.087697	0	0.00921638	1793452	0	0	30.4286	31.2778	2	17	47	52	6	18	chr17	40125293	40125692	400	+	intronexonboundary:519767	uc002hym.1	1267	CNP	hg19_genes_intronexonboundaries	5177
AR_ctr	CD4 mem	chr17	40125572	40125572	1	5	60	Open Sea	NA	NA	NA	NA	0.901361	0.835989	0.0653718	0.107383	4.5e-06	1	0.758621	0.0841389	0.952381	0.692308	0.087697	0	0.00921638	1793452	0	0	30.4286	31.2778	2	17	47	52	6	18	chr17	40125293	40125692	400	+	intronexonboundary:519768	uc010wfz.1	1267	CNP	hg19_genes_intronexonboundaries	5177
AR_ctr	CD4 mem	chr17	40125572	40125572	1	5	60	Open Sea	NA	NA	NA	NA	0.901361	0.835989	0.0653718	0.107383	4.5e-06	1	0.758621	0.0841389	0.952381	0.692308	0.087697	0	0.00921638	1793452	0	0	30.4286	31.2778	2	17	47	52	6	18	chr17	40125293	40125692	400	+	intronexonboundary:519769	uc010wga.1	1267	CNP	hg19_genes_intronexonboundaries	5177
AR_ctr	CD4 mem	chr17	40125572	40125572	1	5	60	Open Sea	NA	NA	NA	NA	0.901361	0.835989	0.0653718	0.107383	4.5e-06	1	0.758621	0.0841389	0.952381	0.692308	0.087697	0	0.00921638	1793452	0	0	30.4286	31.2778	2	17	47	52	6	18	chr17	40124472	40164999	40528	*	inter:15397	NA	NA	NA	hg19_cpg_inter	5177
AR_ctr	CD4 mem	chr11	116985792	116985792	1	4	53	Open Sea	NA	NA	NA	NA	0.863946	0.860191	0.00375481	0.00621173	4.51e-06	1	0.714286	0.11771	0.962963	0.733333	0.0563388	0	0.00922282	3299983	0	0	22.4286	27.1111	12	12	28	38	7	18	chr11	116973994	117002261	28268	*	intergenic:9680	NA	NA	NA	hg19_genes_intergenic	21468
AR_ctr	CD4 mem	chr11	116985792	116985792	1	4	53	Open Sea	NA	NA	NA	NA	0.863946	0.860191	0.00375481	0.00621173	4.51e-06	1	0.714286	0.11771	0.962963	0.733333	0.0563388	0	0.00922282	3299983	0	0	22.4286	27.1111	12	12	28	38	7	18	chr11	116973513	117010699	37187	*	inter:11230	NA	NA	NA	hg19_cpg_inter	21468
AR_ctr	CD4 mem	chr12	110270327	110270327	1	1	71	Open Sea	NA	NA	NA	NA	0.782456	0.694675	0.0877816	0.169374	4.51e-06	1	0.444444	0.207982	0.964286	0.352941	0.144588	0	0.00922282	1392193	0	0	22.2857	26.8333	8	9	40	50	6	17	chr12	110270153	110271152	1000	+	promoter:47070	uc021rdr.1	100616454	MIR4497	hg19_genes_promoters	824
AR_ctr	CD4 mem	chr12	110270327	110270327	1	1	71	Open Sea	NA	NA	NA	NA	0.782456	0.694675	0.0877816	0.169374	4.51e-06	1	0.444444	0.207982	0.964286	0.352941	0.144588	0	0.00922282	1392193	0	0	22.2857	26.8333	8	9	40	50	6	17	chr12	110252633	110271154	18522	-	intron:401361	uc001tpk.2	59341	TRPV4	hg19_genes_introns	824
AR_ctr	CD4 mem	chr12	110270327	110270327	1	1	71	Open Sea	NA	NA	NA	NA	0.782456	0.694675	0.0877816	0.169374	4.51e-06	1	0.444444	0.207982	0.964286	0.352941	0.144588	0	0.00922282	1392193	0	0	22.2857	26.8333	8	9	40	50	6	17	chr12	110269001	110271000	2000	*	shore:29205	NA	NA	NA	hg19_cpg_shores	824
AR_ctr	CD4 mem	chr11	66138255	66138255	1	6	65	Open Sea	NA	NA	NA	NA	0.866805	0.827079	0.0397255	0.0668914	4.6e-06	1	0.769231	0.0950144	0.965517	0.666667	0.079905	0	0.00938378	2207556	0	0	27	27.3889	15	14	43	37	7	18	chr11	66135747	66138329	2583	+	exon:388543	uc001ohw.1	NA	NA	hg19_genes_exons	2507
AR_ctr	CD4 mem	chr11	66138255	66138255	1	6	65	Open Sea	NA	NA	NA	NA	0.866805	0.827079	0.0397255	0.0668914	4.6e-06	1	0.769231	0.0950144	0.965517	0.666667	0.079905	0	0.00938378	2207556	0	0	27	27.3889	15	14	43	37	7	18	chr11	66135747	66138329	2583	+	firstexon:42172	uc001ohw.1	NA	NA	hg19_genes_firstexons	2507
AR_ctr	CD4 mem	chr11	66138255	66138255	1	6	65	Open Sea	NA	NA	NA	NA	0.866805	0.827079	0.0397255	0.0668914	4.6e-06	1	0.769231	0.0950144	0.965517	0.666667	0.079905	0	0.00938378	2207556	0	0	27	27.3889	15	14	43	37	7	18	chr11	66137004	66138714	1711	-	intron:363281	uc009yrf.3	3177	SLC29A2	hg19_genes_introns	2507
AR_ctr	CD4 mem	chr11	66138255	66138255	1	6	65	Open Sea	NA	NA	NA	NA	0.866805	0.827079	0.0397255	0.0668914	4.6e-06	1	0.769231	0.0950144	0.965517	0.666667	0.079905	0	0.00938378	2207556	0	0	27	27.3889	15	14	43	37	7	18	chr11	66137004	66138714	1711	-	intron:363292	uc001oht.3	3177	SLC29A2	hg19_genes_introns	2507
AR_ctr	CD4 mem	chr11	66138255	66138255	1	6	65	Open Sea	NA	NA	NA	NA	0.866805	0.827079	0.0397255	0.0668914	4.6e-06	1	0.769231	0.0950144	0.965517	0.666667	0.079905	0	0.00938378	2207556	0	0	27	27.3889	15	14	43	37	7	18	chr11	66137004	66138714	1711	-	intron:363303	uc001ohu.3	3177	SLC29A2	hg19_genes_introns	2507
AR_ctr	CD4 mem	chr11	66138255	66138255	1	6	65	Open Sea	NA	NA	NA	NA	0.866805	0.827079	0.0397255	0.0668914	4.6e-06	1	0.769231	0.0950144	0.965517	0.666667	0.079905	0	0.00938378	2207556	0	0	27	27.3889	15	14	43	37	7	18	chr11	66137004	66138714	1711	-	intron:363314	uc001ohv.3	3177	SLC29A2	hg19_genes_introns	2507
AR_ctr	CD4 mem	chr11	66138255	66138255	1	6	65	Open Sea	NA	NA	NA	NA	0.866805	0.827079	0.0397255	0.0668914	4.6e-06	1	0.769231	0.0950144	0.965517	0.666667	0.079905	0	0.00938378	2207556	0	0	27	27.3889	15	14	43	37	7	18	chr11	66138129	66138528	400	+	exonintronboundary:364905	uc001ohw.1	NA	NA	hg19_genes_exonintronboundaries	2507
AR_ctr	CD4 mem	chr11	66138255	66138255	1	6	65	Open Sea	NA	NA	NA	NA	0.866805	0.827079	0.0397255	0.0668914	4.6e-06	1	0.769231	0.0950144	0.965517	0.666667	0.079905	0	0.00938378	2207556	0	0	27	27.3889	15	14	43	37	7	18	chr11	66136807	66138806	2000	*	shore:26665	NA	NA	NA	hg19_cpg_shores	2507
AR_ctr	CD4 mem	chr22	50655185	50655185	1	8	67	Island	NA	NA	NA	NA	0.977083	0.813352	0.163732	0.261663	4.63e-06	1	0.90625	0.0399109	0.95	0.6	0.0916255	0	0.00944001	1056345	0	0	14.5714	27.1111	2	15	32	50	5	18	chr22	50655120	50655305	186	+	CDS:535720	uc021wry.1	83642	SELENOO	hg19_genes_cds	4282
AR_ctr	CD4 mem	chr22	50655185	50655185	1	8	67	Island	NA	NA	NA	NA	0.977083	0.813352	0.163732	0.261663	4.63e-06	1	0.90625	0.0399109	0.95	0.6	0.0916255	0	0.00944001	1056345	0	0	14.5714	27.1111	2	15	32	50	5	18	chr22	50655120	50655305	186	+	CDS:535728	uc010hap.3	83642	SELENOO	hg19_genes_cds	4282
AR_ctr	CD4 mem	chr22	50655185	50655185	1	8	67	Island	NA	NA	NA	NA	0.977083	0.813352	0.163732	0.261663	4.63e-06	1	0.90625	0.0399109	0.95	0.6	0.0916255	0	0.00944001	1056345	0	0	14.5714	27.1111	2	15	32	50	5	18	chr22	50655120	50655305	186	+	CDS:535734	uc003bjy.3	83642	SELENOO	hg19_genes_cds	4282
AR_ctr	CD4 mem	chr22	50655185	50655185	1	8	67	Island	NA	NA	NA	NA	0.977083	0.813352	0.163732	0.261663	4.63e-06	1	0.90625	0.0399109	0.95	0.6	0.0916255	0	0.00944001	1056345	0	0	14.5714	27.1111	2	15	32	50	5	18	chr22	50655120	50655320	201	+	5UTR:102269	uc031ryc.1	83642	SELENOO	hg19_genes_5UTRs	4282
AR_ctr	CD4 mem	chr22	50655185	50655185	1	8	67	Island	NA	NA	NA	NA	0.977083	0.813352	0.163732	0.261663	4.63e-06	1	0.90625	0.0399109	0.95	0.6	0.0916255	0	0.00944001	1056345	0	0	14.5714	27.1111	2	15	32	50	5	18	chr22	50655120	50655305	186	+	exon:672621	uc021wry.1	83642	SELENOO	hg19_genes_exons	4282
AR_ctr	CD4 mem	chr22	50655185	50655185	1	8	67	Island	NA	NA	NA	NA	0.977083	0.813352	0.163732	0.261663	4.63e-06	1	0.90625	0.0399109	0.95	0.6	0.0916255	0	0.00944001	1056345	0	0	14.5714	27.1111	2	15	32	50	5	18	chr22	50655120	50655305	186	+	exon:672629	uc010hap.3	83642	SELENOO	hg19_genes_exons	4282
AR_ctr	CD4 mem	chr22	50655185	50655185	1	8	67	Island	NA	NA	NA	NA	0.977083	0.813352	0.163732	0.261663	4.63e-06	1	0.90625	0.0399109	0.95	0.6	0.0916255	0	0.00944001	1056345	0	0	14.5714	27.1111	2	15	32	50	5	18	chr22	50655120	50655305	186	+	exon:672636	uc003bjy.3	83642	SELENOO	hg19_genes_exons	4282
AR_ctr	CD4 mem	chr22	50655185	50655185	1	8	67	Island	NA	NA	NA	NA	0.977083	0.813352	0.163732	0.261663	4.63e-06	1	0.90625	0.0399109	0.95	0.6	0.0916255	0	0.00944001	1056345	0	0	14.5714	27.1111	2	15	32	50	5	18	chr22	50655120	50655557	438	+	exon:672641	uc031ryc.1	83642	SELENOO	hg19_genes_exons	4282
AR_ctr	CD4 mem	chr22	50655185	50655185	1	8	67	Island	NA	NA	NA	NA	0.977083	0.813352	0.163732	0.261663	4.63e-06	1	0.90625	0.0399109	0.95	0.6	0.0916255	0	0.00944001	1056345	0	0	14.5714	27.1111	2	15	32	50	5	18	chr22	50654920	50655319	400	+	intronexonboundary:625902	uc021wry.1	83642	SELENOO	hg19_genes_intronexonboundaries	4282
AR_ctr	CD4 mem	chr22	50655185	50655185	1	8	67	Island	NA	NA	NA	NA	0.977083	0.813352	0.163732	0.261663	4.63e-06	1	0.90625	0.0399109	0.95	0.6	0.0916255	0	0.00944001	1056345	0	0	14.5714	27.1111	2	15	32	50	5	18	chr22	50654920	50655319	400	+	intronexonboundary:625903	uc010hap.3	83642	SELENOO	hg19_genes_intronexonboundaries	4282
AR_ctr	CD4 mem	chr22	50655185	50655185	1	8	67	Island	NA	NA	NA	NA	0.977083	0.813352	0.163732	0.261663	4.63e-06	1	0.90625	0.0399109	0.95	0.6	0.0916255	0	0.00944001	1056345	0	0	14.5714	27.1111	2	15	32	50	5	18	chr22	50654920	50655319	400	+	intronexonboundary:625904	uc003bjy.3	83642	SELENOO	hg19_genes_intronexonboundaries	4282
AR_ctr	CD4 mem	chr22	50655185	50655185	1	8	67	Island	NA	NA	NA	NA	0.977083	0.813352	0.163732	0.261663	4.63e-06	1	0.90625	0.0399109	0.95	0.6	0.0916255	0	0.00944001	1056345	0	0	14.5714	27.1111	2	15	32	50	5	18	chr22	50654920	50655319	400	+	intronexonboundary:625905	uc031ryc.1	83642	SELENOO	hg19_genes_intronexonboundaries	4282
AR_ctr	CD4 mem	chr22	50655185	50655185	1	8	67	Island	NA	NA	NA	NA	0.977083	0.813352	0.163732	0.261663	4.63e-06	1	0.90625	0.0399109	0.95	0.6	0.0916255	0	0.00944001	1056345	0	0	14.5714	27.1111	2	15	32	50	5	18	chr22	50655105	50655504	400	+	exonintronboundary:630660	uc021wry.1	83642	SELENOO	hg19_genes_exonintronboundaries	4282
AR_ctr	CD4 mem	chr22	50655185	50655185	1	8	67	Island	NA	NA	NA	NA	0.977083	0.813352	0.163732	0.261663	4.63e-06	1	0.90625	0.0399109	0.95	0.6	0.0916255	0	0.00944001	1056345	0	0	14.5714	27.1111	2	15	32	50	5	18	chr22	50655105	50655504	400	+	exonintronboundary:630661	uc010hap.3	83642	SELENOO	hg19_genes_exonintronboundaries	4282
AR_ctr	CD4 mem	chr22	50655185	50655185	1	8	67	Island	NA	NA	NA	NA	0.977083	0.813352	0.163732	0.261663	4.63e-06	1	0.90625	0.0399109	0.95	0.6	0.0916255	0	0.00944001	1056345	0	0	14.5714	27.1111	2	15	32	50	5	18	chr22	50655105	50655504	400	+	exonintronboundary:630662	uc003bjy.3	83642	SELENOO	hg19_genes_exonintronboundaries	4282
AR_ctr	CD4 mem	chr22	50655185	50655185	1	8	67	Island	NA	NA	NA	NA	0.977083	0.813352	0.163732	0.261663	4.63e-06	1	0.90625	0.0399109	0.95	0.6	0.0916255	0	0.00944001	1056345	0	0	14.5714	27.1111	2	15	32	50	5	18	chr22	50655146	50655811	666	*	island:26590	NA	NA	NA	hg19_cpg_islands	4282
AR_ctr	CD4 mem	chr5	159591544	159591544	1	3	50	Open Sea	NA	NA	NA	NA	0.92344	0.891705	0.0317351	0.0499019	4.65e-06	1	0.829787	0.064656	0.982456	0.744186	0.0643808	0	0.00945868	2445846	0	0	33.2857	44.6667	20	21	48	73	7	18	chr5	159551453	159609373	57921	*	intergenic:4996	NA	NA	NA	hg19_genes_intergenic	22828
AR_ctr	CD4 mem	chr5	159591544	159591544	1	3	50	Open Sea	NA	NA	NA	NA	0.92344	0.891705	0.0317351	0.0499019	4.65e-06	1	0.829787	0.064656	0.982456	0.744186	0.0643808	0	0.00945868	2445846	0	0	33.2857	44.6667	20	21	48	73	7	18	chr5	159550535	159734781	184247	*	inter:5598	NA	NA	NA	hg19_cpg_inter	22828
AR_ctr	CD4 mem	chr5	164743297	164743297	1	3	51	Open Sea	NA	NA	NA	NA	0.910649	0.865322	0.0453272	0.0728378	4.67e-06	1	0.782609	0.077997	0.95	0.615385	0.0962104	0	0.00948766	2136662	0	0	14	15	5	6	23	20	6	17	chr5	164029424	165031445	1002022	*	intergenic:5009	NA	NA	NA	hg19_genes_intergenic	293147
AR_ctr	CD4 mem	chr5	164743297	164743297	1	3	51	Open Sea	NA	NA	NA	NA	0.910649	0.865322	0.0453272	0.0728378	4.67e-06	1	0.782609	0.077997	0.95	0.615385	0.0962104	0	0.00948766	2136662	0	0	14	15	5	6	23	20	6	17	chr5	162936947	166401484	3464538	*	inter:5606	NA	NA	NA	hg19_cpg_inter	293147
AR_ctr	CD4 mem	chr6	33662317	33662317	1	7	63	Open Sea	NA	NA	NA	NA	0.151515	0.180986	-0.0294706	-0.241796	4.72e-06	0.4	0	0.167941	0.5	0.05	0.129309	0	0.00958085	2015070	0	0	14.8571	19.1111	2	9	33	33	5	17	chr6	33662057	33666434	4378	-	exon:247261	uc003oez.1	NA	NA	hg19_genes_exons	73160
AR_ctr	CD4 mem	chr6	33662317	33662317	1	7	63	Open Sea	NA	NA	NA	NA	0.151515	0.180986	-0.0294706	-0.241796	4.72e-06	0.4	0	0.167941	0.5	0.05	0.129309	0	0.00958085	2015070	0	0	14.8571	19.1111	2	9	33	33	5	17	chr6	33662057	33666434	4378	-	firstexon:26500	uc003oez.1	NA	NA	hg19_genes_firstexons	73160
AR_ctr	CD4 mem	chr6	33662317	33662317	1	7	63	Open Sea	NA	NA	NA	NA	0.151515	0.180986	-0.0294706	-0.241796	4.72e-06	0.4	0	0.167941	0.5	0.05	0.129309	0	0.00958085	2015070	0	0	14.8571	19.1111	2	9	33	33	5	17	chr6	33661483	33662700	1218	+	intron:205794	uc021ywr.1	3710	ITPR3	hg19_genes_introns	73160
AR_ctr	CD4 mem	chr6	33662317	33662317	1	7	63	Open Sea	NA	NA	NA	NA	0.151515	0.180986	-0.0294706	-0.241796	4.72e-06	0.4	0	0.167941	0.5	0.05	0.129309	0	0.00958085	2015070	0	0	14.8571	19.1111	2	9	33	33	5	17	chr6	33660239	33675158	14920	*	inter:6076	NA	NA	NA	hg19_cpg_inter	73160
AR_ctr	CD4 mem	chr19	50053379	50053379	1	6	61	Open Sea	NA	NA	NA	NA	0.900658	0.808991	0.0916676	0.153063	4.76e-06	1	0.8	0.0752176	0.9375	0.6	0.105579	0	0.0096455	1477298	0	0	15.5714	16.1111	7	3	23	36	5	15	chr19	50046891	50058724	11834	*	intergenic:14364	NA	NA	NA	hg19_genes_intergenic	22503
AR_ctr	CD4 mem	chr19	50053379	50053379	1	6	61	Open Sea	NA	NA	NA	NA	0.900658	0.808991	0.0916676	0.153063	4.76e-06	1	0.8	0.0752176	0.9375	0.6	0.105579	0	0.0096455	1477298	0	0	15.5714	16.1111	7	3	23	36	5	15	chr19	50041671	50054876	13206	*	inter:17476	NA	NA	NA	hg19_cpg_inter	22503
AR_ctr	CD4 mem	chr21	45249915	45249915	1	5	62	Open Sea	NA	NA	NA	NA	0.789381	0.674171	0.11521	0.224527	4.78e-06	1	0.387097	0.214196	0.863636	0.333333	0.142245	0	0.00966609	1170424	0	0	19	21.6111	5	5	33	42	6	15	chr21	45237449	45280115	42667	*	intergenic:15203	NA	NA	NA	hg19_genes_intergenic	32672
AR_ctr	CD4 mem	chr21	45249915	45249915	1	5	62	Open Sea	NA	NA	NA	NA	0.789381	0.674171	0.11521	0.224527	4.78e-06	1	0.387097	0.214196	0.863636	0.333333	0.142245	0	0.00966609	1170424	0	0	19	21.6111	5	5	33	42	6	15	chr21	45248491	45250490	2000	*	shelf:39272	NA	NA	NA	hg19_cpg_shelves	32672
AR_ctr	CD4 mem	chr9	91605894	91605894	1	7	55	Island	NA	NA	2987	9023	0.254154	0.310825	-0.0566717	-0.280411	4.79e-06	0.5	0	0.19281	0.619048	0.111111	0.145381	0	0.00966616	1297545	0	0	12.2857	22.2222	7	9	18	36	6	17	chr9	91605324	91606323	1000	+	promoter:34935	uc004aqe.4	1903	S1PR3	hg19_genes_promoters	115
AR_ctr	CD4 mem	chr9	91605894	91605894	1	7	55	Island	NA	NA	2987	9023	0.254154	0.310825	-0.0566717	-0.280411	4.79e-06	0.5	0	0.19281	0.619048	0.111111	0.145381	0	0.00966616	1297545	0	0	12.2857	22.2222	7	9	18	36	6	17	chr9	91605778	91605910	133	+	5UTR:48763	uc004aqc.2	286223	C9orf47	hg19_genes_5UTRs	115
AR_ctr	CD4 mem	chr9	91605894	91605894	1	7	55	Island	NA	NA	2987	9023	0.254154	0.310825	-0.0566717	-0.280411	4.79e-06	0.5	0	0.19281	0.619048	0.111111	0.145381	0	0.00966616	1297545	0	0	12.2857	22.2222	7	9	18	36	6	17	chr9	91605778	91605910	133	+	5UTR:48764	uc004aqd.3	286223	C9orf47	hg19_genes_5UTRs	115
AR_ctr	CD4 mem	chr9	91605894	91605894	1	7	55	Island	NA	NA	2987	9023	0.254154	0.310825	-0.0566717	-0.280411	4.79e-06	0.5	0	0.19281	0.619048	0.111111	0.145381	0	0.00966616	1297545	0	0	12.2857	22.2222	7	9	18	36	6	17	chr9	91605778	91606099	322	+	exon:321624	uc004aqc.2	286223	C9orf47	hg19_genes_exons	115
AR_ctr	CD4 mem	chr9	91605894	91605894	1	7	55	Island	NA	NA	2987	9023	0.254154	0.310825	-0.0566717	-0.280411	4.79e-06	0.5	0	0.19281	0.619048	0.111111	0.145381	0	0.00966616	1297545	0	0	12.2857	22.2222	7	9	18	36	6	17	chr9	91605778	91606156	379	+	exon:321627	uc004aqd.3	286223	C9orf47	hg19_genes_exons	115
AR_ctr	CD4 mem	chr9	91605894	91605894	1	7	55	Island	NA	NA	2987	9023	0.254154	0.310825	-0.0566717	-0.280411	4.79e-06	0.5	0	0.19281	0.619048	0.111111	0.145381	0	0.00966616	1297545	0	0	12.2857	22.2222	7	9	18	36	6	17	chr9	91605778	91606099	322	+	firstexon:34933	uc004aqc.2	286223	C9orf47	hg19_genes_firstexons	115
AR_ctr	CD4 mem	chr9	91605894	91605894	1	7	55	Island	NA	NA	2987	9023	0.254154	0.310825	-0.0566717	-0.280411	4.79e-06	0.5	0	0.19281	0.619048	0.111111	0.145381	0	0.00966616	1297545	0	0	12.2857	22.2222	7	9	18	36	6	17	chr9	91605778	91606156	379	+	firstexon:34934	uc004aqd.3	286223	C9orf47	hg19_genes_firstexons	115
AR_ctr	CD4 mem	chr9	91605894	91605894	1	7	55	Island	NA	NA	2987	9023	0.254154	0.310825	-0.0566717	-0.280411	4.79e-06	0.5	0	0.19281	0.619048	0.111111	0.145381	0	0.00966616	1297545	0	0	12.2857	22.2222	7	9	18	36	6	17	chr9	91605765	91606141	377	*	island:11866	NA	NA	NA	hg19_cpg_islands	115
AR_ctr	CD4 mem	chr11	61061453	61061453	1	4	62	Open Sea	NA	NA	NA	NA	0.102088	0.159908	-0.0578198	-0.600119	4.8e-06	0.222222	0	0.0912846	0.232558	0.05	0.0509385	0	0.00969309	1275573	0	0	50.2857	68	7	20	105	112	6	18	chr11	61059049	61062399	3351	-	intron:361001	uc001nra.3	220001	VWCE	hg19_genes_introns	39199
AR_ctr	CD4 mem	chr11	61061453	61061453	1	4	62	Open Sea	NA	NA	NA	NA	0.102088	0.159908	-0.0578198	-0.600119	4.8e-06	0.222222	0	0.0912846	0.232558	0.05	0.0509385	0	0.00969309	1275573	0	0	50.2857	68	7	20	105	112	6	18	chr11	61059049	61062399	3351	-	intron:361020	uc001nrb.3	220001	VWCE	hg19_genes_introns	39199
AR_ctr	CD4 mem	chr11	61061453	61061453	1	4	62	Open Sea	NA	NA	NA	NA	0.102088	0.159908	-0.0578198	-0.600119	4.8e-06	0.222222	0	0.0912846	0.232558	0.05	0.0509385	0	0.00969309	1275573	0	0	50.2857	68	7	20	105	112	6	18	chr11	61059752	61061751	2000	*	shore:26284	NA	NA	NA	hg19_cpg_shores	39199
AR_ctr	CD4 mem	chr2	134598911	134598911	1	2	43	Open Sea	NA	NA	NA	NA	0.91397	0.826099	0.0878707	0.144172	4.81e-06	1	0.8125	0.0722748	0.961538	0.555556	0.104019	0	0.00970762	1532237	0	0	22.1429	26.6667	8	9	39	39	6	17	chr2	134353971	134879695	525725	*	intergenic:2303	NA	NA	NA	hg19_genes_intergenic	245248
AR_ctr	CD4 mem	chr2	134598911	134598911	1	2	43	Open Sea	NA	NA	NA	NA	0.91397	0.826099	0.0878707	0.144172	4.81e-06	1	0.8125	0.0722748	0.961538	0.555556	0.104019	0	0.00970762	1532237	0	0	22.1429	26.6667	8	9	39	39	6	17	chr2	134028468	134763365	734898	*	inter:2674	NA	NA	NA	hg19_cpg_inter	245248
AR_ctr	CD4 mem	chr3	25894262	25894262	1	6	56	Open Sea	NA	NA	NA	NA	0.921352	0.820117	0.101235	0.166012	4.84e-06	1	0.689655	0.106804	0.923077	0.607143	0.087819	0	0.00974322	1411154	0	0	30.4286	35.2222	10	16	44	57	7	18	chr3	25836531	25900022	63492	*	intergenic:2867	NA	NA	NA	hg19_genes_intergenic	62698
AR_ctr	CD4 mem	chr3	25894262	25894262	1	6	56	Open Sea	NA	NA	NA	NA	0.921352	0.820117	0.101235	0.166012	4.84e-06	1	0.689655	0.106804	0.923077	0.607143	0.087819	0	0.00974322	1411154	0	0	30.4286	35.2222	10	16	44	57	7	18	chr3	25829457	26660104	830648	*	inter:3312	NA	NA	NA	hg19_cpg_inter	62698
AR_ctr	CD4 mem	chr15	85942456	85942456	1	7	53	Open Sea	NA	NA	NA	NA	0.817965	0.726599	0.0913663	0.168691	4.86e-06	1	0.666667	0.14715	0.896552	0.444444	0.134784	0	0.00978148	1395117	0	0	10.1429	11.9444	7	4	15	29	5	11	chr15	85924030	86028940	104911	+	intron:450030	uc002bls.4	11214	AKAP13	hg19_genes_introns	18608
AR_ctr	CD4 mem	chr15	85942456	85942456	1	7	53	Open Sea	NA	NA	NA	NA	0.817965	0.726599	0.0913663	0.168691	4.86e-06	1	0.666667	0.14715	0.896552	0.444444	0.134784	0	0.00978148	1395117	0	0	10.1429	11.9444	7	4	15	29	5	11	chr15	85924030	86028940	104911	+	intron:450033	uc002blt.2	11214	AKAP13	hg19_genes_introns	18608
AR_ctr	CD4 mem	chr15	85942456	85942456	1	7	53	Open Sea	NA	NA	NA	NA	0.817965	0.726599	0.0913663	0.168691	4.86e-06	1	0.666667	0.14715	0.896552	0.444444	0.134784	0	0.00978148	1395117	0	0	10.1429	11.9444	7	4	15	29	5	11	chr15	85924030	86028940	104911	+	intron:450047	uc002blu.2	11214	AKAP13	hg19_genes_introns	18608
AR_ctr	CD4 mem	chr15	85942456	85942456	1	7	53	Open Sea	NA	NA	NA	NA	0.817965	0.726599	0.0913663	0.168691	4.86e-06	1	0.666667	0.14715	0.896552	0.444444	0.134784	0	0.00978148	1395117	0	0	10.1429	11.9444	7	4	15	29	5	11	chr15	85924030	86028940	104911	+	intron:450083	uc002blv.2	11214	AKAP13	hg19_genes_introns	18608
AR_ctr	CD4 mem	chr15	85942456	85942456	1	7	53	Open Sea	NA	NA	NA	NA	0.817965	0.726599	0.0913663	0.168691	4.86e-06	1	0.666667	0.14715	0.896552	0.444444	0.134784	0	0.00978148	1395117	0	0	10.1429	11.9444	7	4	15	29	5	11	chr15	85928681	86280329	351649	*	inter:13862	NA	NA	NA	hg19_cpg_inter	18608
AR_ctr	CD4 mem	chr9	128169690	128169690	1	4	62	Open Sea	NA	NA	NA	NA	0.806772	0.676062	0.13071	0.251595	4.87e-06	1	0.454545	0.203567	0.888889	0.384615	0.133731	0	0.00979396	1088185	0	0	14.4286	11.5556	1	4	25	21	5	11	chr9	128127291	128199672	72382	*	intergenic:8072	NA	NA	NA	hg19_genes_intergenic	61520
AR_ctr	CD4 mem	chr9	128169690	128169690	1	4	62	Open Sea	NA	NA	NA	NA	0.806772	0.676062	0.13071	0.251595	4.87e-06	1	0.454545	0.203567	0.888889	0.384615	0.133731	0	0.00979396	1088185	0	0	14.4286	11.5556	1	4	25	21	5	11	chr9	128168166	128170165	2000	*	shore:22309	NA	NA	NA	hg19_cpg_shores	61520
AR_ctr	CD4 mem	chr10	12170921	12170921	1	9	57	Open Sea	NA	NA	NA	NA	0.897522	0.762816	0.134706	0.231808	5.03e-06	1	0.8	0.0845299	0.909091	0.4	0.12477	0	0.0100734	1147570	0	0	12.2857	12.0556	7	5	19	18	5	11	chr10	12170640	12171639	1000	+	promoter:37672	uc001ile.2	55176	SEC61A2	hg19_genes_promoters	717
AR_ctr	CD4 mem	chr10	12170921	12170921	1	9	57	Open Sea	NA	NA	NA	NA	0.897522	0.762816	0.134706	0.231808	5.03e-06	1	0.8	0.0845299	0.909091	0.4	0.12477	0	0.0100734	1147570	0	0	12.2857	12.0556	7	5	19	18	5	11	chr10	12170640	12171639	1000	+	promoter:37673	uc010qbq.1	55176	SEC61A2	hg19_genes_promoters	717
AR_ctr	CD4 mem	chr10	12170921	12170921	1	9	57	Open Sea	NA	NA	NA	NA	0.897522	0.762816	0.134706	0.231808	5.03e-06	1	0.8	0.0845299	0.909091	0.4	0.12477	0	0.0100734	1147570	0	0	12.2857	12.0556	7	5	19	18	5	11	chr10	12170640	12171639	1000	+	promoter:37674	uc001ilf.4	55176	SEC61A2	hg19_genes_promoters	717
AR_ctr	CD4 mem	chr10	12170921	12170921	1	9	57	Open Sea	NA	NA	NA	NA	0.897522	0.762816	0.134706	0.231808	5.03e-06	1	0.8	0.0845299	0.909091	0.4	0.12477	0	0.0100734	1147570	0	0	12.2857	12.0556	7	5	19	18	5	11	chr10	12170640	12171639	1000	+	promoter:37675	uc001ilg.4	55176	SEC61A2	hg19_genes_promoters	717
AR_ctr	CD4 mem	chr10	12170921	12170921	1	9	57	Open Sea	NA	NA	NA	NA	0.897522	0.762816	0.134706	0.231808	5.03e-06	1	0.8	0.0845299	0.909091	0.4	0.12477	0	0.0100734	1147570	0	0	12.2857	12.0556	7	5	19	18	5	11	chr10	12170640	12171639	1000	+	promoter:37676	uc001ilh.4	55176	SEC61A2	hg19_genes_promoters	717
AR_ctr	CD4 mem	chr10	12170921	12170921	1	9	57	Open Sea	NA	NA	NA	NA	0.897522	0.762816	0.134706	0.231808	5.03e-06	1	0.8	0.0845299	0.909091	0.4	0.12477	0	0.0100734	1147570	0	0	12.2857	12.0556	7	5	19	18	5	11	chr10	12169226	12171225	2000	*	shore:23387	NA	NA	NA	hg19_cpg_shores	717
AR_ctr	CD4 mem	chr16	85316057	85316057	1	2	46	Open Sea	NA	NA	17686	32090	0.778521	0.657343	0.121178	0.240721	5.11e-06	1	0.511111	0.189344	0.826087	0.26087	0.14371	0	0.0101983	1119344	0	1	26.5714	25.2222	8	0	45	56	6	17	chr16	85315564	85316563	1000	+	promoter:58527	uc021tmc.1	197196	LINC00311	hg19_genes_promoters	505
AR_ctr	CD4 mem	chr16	85316057	85316057	1	2	46	Open Sea	NA	NA	17686	32090	0.778521	0.657343	0.121178	0.240721	5.11e-06	1	0.511111	0.189344	0.826087	0.26087	0.14371	0	0.0101983	1119344	0	1	26.5714	25.2222	8	0	45	56	6	17	chr16	85315750	85317749	2000	*	shore:36159	NA	NA	NA	hg19_cpg_shores	505
AR_ctr	CD4 mem	chr19	4800982	4800982	1	4	59	Open Sea	NA	NA	NA	NA	0.83355	0.752463	0.0810872	0.145807	5.14e-06	1	0.6	0.153557	1	0.333333	0.171255	0	0.0102457	1522795	0	0	11.1429	14.4444	2	6	16	19	5	16	chr19	4799949	4815935	15987	*	intergenic:13757	NA	NA	NA	hg19_genes_intergenic	9253
AR_ctr	CD4 mem	chr19	4800982	4800982	1	4	59	Open Sea	NA	NA	NA	NA	0.83355	0.752463	0.0810872	0.145807	5.14e-06	1	0.6	0.153557	1	0.333333	0.171255	0	0.0102457	1522795	0	0	11.1429	14.4444	2	6	16	19	5	16	chr19	4797218	4827433	30216	*	inter:16555	NA	NA	NA	hg19_cpg_inter	9253
AR_ctr	CD4 mem	chr19	8402999	8402999	1	2	59	Open Sea	NA	NA	NA	NA	0.920036	0.792104	0.127932	0.213497	5.14e-06	1	0.772727	0.0909086	1	0.333333	0.145001	0	0.0102457	1208468	0	0	25.8571	24	12	4	44	46	7	16	chr19	8400315	8404314	4000	-	1to5kb:68507	uc002mjp.1	256949	KANK3	hg19_genes_1to5kb	16614
AR_ctr	CD4 mem	chr19	8402999	8402999	1	2	59	Open Sea	NA	NA	NA	NA	0.920036	0.792104	0.127932	0.213497	5.14e-06	1	0.772727	0.0909086	1	0.333333	0.145001	0	0.0102457	1208468	0	0	25.8571	24	12	4	44	46	7	16	chr19	8402741	8408108	5368	-	intron:554582	uc010dwa.3	256949	KANK3	hg19_genes_introns	16614
AR_ctr	CD4 mem	chr19	8402999	8402999	1	2	59	Open Sea	NA	NA	NA	NA	0.920036	0.792104	0.127932	0.213497	5.14e-06	1	0.772727	0.0909086	1	0.333333	0.145001	0	0.0102457	1208468	0	0	25.8571	24	12	4	44	46	7	16	chr19	8402462	8405674	3213	*	shelf:35330	NA	NA	NA	hg19_cpg_shelves	16614
AR_ctr	CD4 mem	chr1	1068572	1068572	1	1	63	Shelf	NA	NA	NA	NA	0.819846	0.687399	0.132448	0.25086	5.18e-06	1	0.62963	0.164106	0.857143	0.448276	0.113374	0	0.010329	1090074	0	0	16	28.2778	1	5	41	58	5	17	chr1	1067397	1071396	4000	+	1to5kb:67	uc001acv.3	254099	LINC01342	hg19_genes_1to5kb	3823
AR_ctr	CD4 mem	chr1	1068572	1068572	1	1	63	Shelf	NA	NA	NA	NA	0.819846	0.687399	0.132448	0.25086	5.18e-06	1	0.62963	0.164106	0.857143	0.448276	0.113374	0	0.010329	1090074	0	0	16	28.2778	1	5	41	58	5	17	chr1	1068370	1070369	2000	*	shelf:45	NA	NA	NA	hg19_cpg_shelves	3823
AR_ctr	CD4 mem	chr5	127872852	127872852	1	8	71	Island	NA	NA	NA	NA	0.123384	0.183342	-0.0599575	-0.535566	5.19e-06	0.222222	0	0.0919704	0.311111	0.0625	0.0671953	0	0.010329	1235686	0	0	32	45.1111	7	14	49	93	6	18	chr5	127872178	127873042	865	-	intron:195236	uc003kuu.3	2201	FBN2	hg19_genes_introns	379171
AR_ctr	CD4 mem	chr5	127872852	127872852	1	8	71	Island	NA	NA	NA	NA	0.123384	0.183342	-0.0599575	-0.535566	5.19e-06	0.222222	0	0.0919704	0.311111	0.0625	0.0671953	0	0.010329	1235686	0	0	32	45.1111	7	14	49	93	6	18	chr5	127872178	127873042	865	-	intron:195268	uc003kuv.2	2201	FBN2	hg19_genes_introns	379171
AR_ctr	CD4 mem	chr5	127872852	127872852	1	8	71	Island	NA	NA	NA	NA	0.123384	0.183342	-0.0599575	-0.535566	5.19e-06	0.222222	0	0.0919704	0.311111	0.0625	0.0671953	0	0.010329	1235686	0	0	32	45.1111	7	14	49	93	6	18	chr5	127872178	127873042	865	-	intron:195275	uc003kuw.4	2201	FBN2	hg19_genes_introns	379171
AR_ctr	CD4 mem	chr5	127872852	127872852	1	8	71	Island	NA	NA	NA	NA	0.123384	0.183342	-0.0599575	-0.535566	5.19e-06	0.222222	0	0.0919704	0.311111	0.0625	0.0671953	0	0.010329	1235686	0	0	32	45.1111	7	14	49	93	6	18	chr5	127872844	127873243	400	-	exonintronboundary:205433	uc003kuu.3	2201	FBN2	hg19_genes_exonintronboundaries	379171
AR_ctr	CD4 mem	chr5	127872852	127872852	1	8	71	Island	NA	NA	NA	NA	0.123384	0.183342	-0.0599575	-0.535566	5.19e-06	0.222222	0	0.0919704	0.311111	0.0625	0.0671953	0	0.010329	1235686	0	0	32	45.1111	7	14	49	93	6	18	chr5	127872844	127873243	400	-	exonintronboundary:205434	uc003kuv.2	2201	FBN2	hg19_genes_exonintronboundaries	379171
AR_ctr	CD4 mem	chr5	127872852	127872852	1	8	71	Island	NA	NA	NA	NA	0.123384	0.183342	-0.0599575	-0.535566	5.19e-06	0.222222	0	0.0919704	0.311111	0.0625	0.0671953	0	0.010329	1235686	0	0	32	45.1111	7	14	49	93	6	18	chr5	127872844	127873243	400	-	exonintronboundary:205435	uc003kuw.4	2201	FBN2	hg19_genes_exonintronboundaries	379171
AR_ctr	CD4 mem	chr5	127872852	127872852	1	8	71	Island	NA	NA	NA	NA	0.123384	0.183342	-0.0599575	-0.535566	5.19e-06	0.222222	0	0.0919704	0.311111	0.0625	0.0671953	0	0.010329	1235686	0	0	32	45.1111	7	14	49	93	6	18	chr5	127872564	127874945	2382	*	island:6968	NA	NA	NA	hg19_cpg_islands	379171
AR_ctr	CD4 mem	chr10	121314670	121314670	1	2	54	Open Sea	NA	NA	NA	NA	0.899449	0.909645	-0.0101962	-0.0160846	5.26e-06	1	0.782609	0.0823691	1	0.666667	0.0797234	0	0.0104598	3080607	0	0	22.5714	26.9444	6	14	33	42	6	18	chr10	121307223	121332977	25755	*	intergenic:8794	NA	NA	NA	hg19_genes_intergenic	96210
AR_ctr	CD4 mem	chr10	121314670	121314670	1	2	54	Open Sea	NA	NA	NA	NA	0.899449	0.909645	-0.0101962	-0.0160846	5.26e-06	1	0.782609	0.0823691	1	0.666667	0.0797234	0	0.0104598	3080607	0	0	22.5714	26.9444	6	14	33	42	6	18	chr10	121307170	121351813	44644	*	inter:10228	NA	NA	NA	hg19_cpg_inter	96210
AR_ctr	CD4 mem	chr16	89114846	89114846	1	9	79	Island	NA	NA	NA	NA	0.251918	0.380137	-0.12822	-0.574869	5.37e-06	0.588235	0	0.237934	0.642857	0.0666667	0.158608	0	0.01065	608015	0	0	11.8571	14.9444	1	5	19	38	5	14	chr16	89114229	89118868	4640	-	intron:489271	uc002fmo.1	NA	NA	hg19_genes_introns	45369
AR_ctr	CD4 mem	chr16	89114846	89114846	1	9	79	Island	NA	NA	NA	NA	0.251918	0.380137	-0.12822	-0.574869	5.37e-06	0.588235	0	0.237934	0.642857	0.0666667	0.158608	0	0.01065	608015	0	0	11.8571	14.9444	1	5	19	38	5	14	chr16	89114530	89114863	334	*	island:19987	NA	NA	NA	hg19_cpg_islands	45369
AR_ctr	CD4 mem	chr1	32758847	32758847	1	2	56	Open Sea	NA	NA	NA	NA	0.856439	0.758983	0.097456	0.172147	5.47e-06	1	0.653846	0.128971	0.941176	0.533333	0.128536	0	0.0108252	1379600	0	0	19.2857	25.7778	7	12	26	43	5	18	chr1	32757820	32768221	10402	+	intron:7091	uc010ohd.1	3065	HDAC1	hg19_genes_introns	853
AR_ctr	CD4 mem	chr1	32758847	32758847	1	2	56	Open Sea	NA	NA	NA	NA	0.856439	0.758983	0.097456	0.172147	5.47e-06	1	0.653846	0.128971	0.941176	0.533333	0.128536	0	0.0108252	1379600	0	0	19.2857	25.7778	7	12	26	43	5	18	chr1	32757820	32782265	24446	+	intron:7096	uc010ohe.1	3065	HDAC1	hg19_genes_introns	853
AR_ctr	CD4 mem	chr1	32758847	32758847	1	2	56	Open Sea	NA	NA	NA	NA	0.856439	0.758983	0.097456	0.172147	5.47e-06	1	0.653846	0.128971	0.941176	0.533333	0.128536	0	0.0108252	1379600	0	0	19.2857	25.7778	7	12	26	43	5	18	chr1	32757820	32768221	10402	+	intron:7100	uc001bvb.1	3065	HDAC1	hg19_genes_introns	853
AR_ctr	CD4 mem	chr1	32758847	32758847	1	2	56	Open Sea	NA	NA	NA	NA	0.856439	0.758983	0.097456	0.172147	5.47e-06	1	0.653846	0.128971	0.941176	0.533333	0.128536	0	0.0108252	1379600	0	0	19.2857	25.7778	7	12	26	43	5	18	chr1	32758039	32768221	10183	+	intron:7113	uc010ohf.1	3065	HDAC1	hg19_genes_introns	853
AR_ctr	CD4 mem	chr1	32758847	32758847	1	2	56	Open Sea	NA	NA	NA	NA	0.856439	0.758983	0.097456	0.172147	5.47e-06	1	0.653846	0.128971	0.941176	0.533333	0.128536	0	0.0108252	1379600	0	0	19.2857	25.7778	7	12	26	43	5	18	chr1	32758035	32760034	2000	*	shore:1456	NA	NA	NA	hg19_cpg_shores	853
AR_ctr	CD4 mem	chr1	183745485	183745485	1	8	53	Open Sea	NA	NA	NA	NA	0.919825	0.877774	0.0420515	0.0667675	5.48e-06	1	0.826087	0.0651502	0.972222	0.769231	0.0661911	0	0.0108252	2208938	0	0	30.7143	34.5	14	15	51	53	7	18	chr1	183711425	183852919	141495	+	intron:26582	uc010pof.1	23179	RGL1	hg19_genes_introns	28788
AR_ctr	CD4 mem	chr1	183745485	183745485	1	8	53	Open Sea	NA	NA	NA	NA	0.919825	0.877774	0.0420515	0.0667675	5.48e-06	1	0.826087	0.0651502	0.972222	0.769231	0.0661911	0	0.0108252	2208938	0	0	30.7143	34.5	14	15	51	53	7	18	chr1	183711425	183775508	64084	+	intron:26593	uc001gqm.3	23179	RGL1	hg19_genes_introns	28788
AR_ctr	CD4 mem	chr1	183745485	183745485	1	8	53	Open Sea	NA	NA	NA	NA	0.919825	0.877774	0.0420515	0.0667675	5.48e-06	1	0.826087	0.0651502	0.972222	0.769231	0.0661911	0	0.0108252	2208938	0	0	30.7143	34.5	14	15	51	53	7	18	chr1	183711425	183816699	105275	+	intron:26612	uc010pog.2	23179	RGL1	hg19_genes_introns	28788
AR_ctr	CD4 mem	chr1	183745485	183745485	1	8	53	Open Sea	NA	NA	NA	NA	0.919825	0.877774	0.0420515	0.0667675	5.48e-06	1	0.826087	0.0651502	0.972222	0.769231	0.0661911	0	0.0108252	2208938	0	0	30.7143	34.5	14	15	51	53	7	18	chr1	183711425	183816699	105275	+	intron:26629	uc010poh.2	23179	RGL1	hg19_genes_introns	28788
AR_ctr	CD4 mem	chr1	183745485	183745485	1	8	53	Open Sea	NA	NA	NA	NA	0.919825	0.877774	0.0420515	0.0667675	5.48e-06	1	0.826087	0.0651502	0.972222	0.769231	0.0661911	0	0.0108252	2208938	0	0	30.7143	34.5	14	15	51	53	7	18	chr1	183609334	183770193	160860	*	inter:1482	NA	NA	NA	hg19_cpg_inter	28788
AR_ctr	CD4 mem	chr14	56662583	56662583	1	3	61	Open Sea	NA	NA	NA	NA	0.140837	0.188603	-0.0477661	-0.396898	5.49e-06	0.230769	0	0.0981407	0.315789	0.0487805	0.0759104	0	0.0108446	1490219	0	0	33.2857	44.3333	22	15	45	97	7	18	chr14	56645183	56746393	101211	+	intron:419969	uc001xch.3	57161	PELI2	hg19_genes_introns	77489
AR_ctr	CD4 mem	chr14	56662583	56662583	1	3	61	Open Sea	NA	NA	NA	NA	0.140837	0.188603	-0.0477661	-0.396898	5.49e-06	0.230769	0	0.0981407	0.315789	0.0487805	0.0759104	0	0.0108446	1490219	0	0	33.2857	44.3333	22	15	45	97	7	18	chr14	56590235	57042472	452238	*	inter:12907	NA	NA	NA	hg19_cpg_inter	77489
AR_ctr	CD4 mem	chr1	228778839	228778839	1	9	71	Island	NA	NA	NA	NA	0.736565	0.575583	0.160982	0.350395	5.52e-06	1	0.416667	0.222566	1	0.25	0.191645	0	0.0108865	869575	0	0	13.7143	15.3333	2	2	29	53	5	13	chr1	228775394	228779393	4000	+	1to5kb:3831	uc001htd.2	574029	DUSP5P1	hg19_genes_1to5kb	1553
AR_ctr	CD4 mem	chr1	228778839	228778839	1	9	71	Island	NA	NA	NA	NA	0.736565	0.575583	0.160982	0.350395	5.52e-06	1	0.416667	0.222566	1	0.25	0.191645	0	0.0108865	869575	0	0	13.7143	15.3333	2	2	29	53	5	13	chr1	228775394	228779393	4000	+	1to5kb:3832	uc021pkj.1	58480	RHOU	hg19_genes_1to5kb	1553
AR_ctr	CD4 mem	chr1	228778839	228778839	1	9	71	Island	NA	NA	NA	NA	0.736565	0.575583	0.160982	0.350395	5.52e-06	1	0.416667	0.222566	1	0.25	0.191645	0	0.0108865	869575	0	0	13.7143	15.3333	2	2	29	53	5	13	chr1	228744111	228784168	40058	*	island:2319	NA	NA	NA	hg19_cpg_islands	1553
AR_ctr	CD4 mem	chr17	78518185	78518185	1	6	50	Open Sea	NA	NA	NA	NA	0.923225	0.872564	0.0506611	0.0805241	5.53e-06	1	0.815789	0.0634668	0.972973	0.612903	0.0886724	0	0.0109121	2050143	0	0	34.5714	34.9444	8	6	59	64	6	17	chr17	78517625	78518624	1000	+	promoter:62174	uc002jys.3	57521	RPTOR	hg19_genes_promoters	438
AR_ctr	CD4 mem	chr17	78518185	78518185	1	6	50	Open Sea	NA	NA	NA	NA	0.923225	0.872564	0.0506611	0.0805241	5.53e-06	1	0.815789	0.0634668	0.972973	0.612903	0.0886724	0	0.0109121	2050143	0	0	34.5714	34.9444	8	6	59	64	6	17	chr17	78517625	78518624	1000	+	promoter:62175	uc010wuf.1	57521	RPTOR	hg19_genes_promoters	438
AR_ctr	CD4 mem	chr17	78518185	78518185	1	6	50	Open Sea	NA	NA	NA	NA	0.923225	0.872564	0.0506611	0.0805241	5.53e-06	1	0.815789	0.0634668	0.972973	0.612903	0.0886724	0	0.0109121	2050143	0	0	34.5714	34.9444	8	6	59	64	6	17	chr17	78517625	78518624	1000	+	promoter:62176	uc002jyt.1	57521	RPTOR	hg19_genes_promoters	438
AR_ctr	CD4 mem	chr17	78518185	78518185	1	6	50	Open Sea	NA	NA	NA	NA	0.923225	0.872564	0.0506611	0.0805241	5.53e-06	1	0.815789	0.0634668	0.972973	0.612903	0.0886724	0	0.0109121	2050143	0	0	34.5714	34.9444	8	6	59	64	6	17	chr17	78517625	78518624	1000	+	promoter:62177	uc010wug.1	57521	RPTOR	hg19_genes_promoters	438
AR_ctr	CD4 mem	chr17	78518185	78518185	1	6	50	Open Sea	NA	NA	NA	NA	0.923225	0.872564	0.0506611	0.0805241	5.53e-06	1	0.815789	0.0634668	0.972973	0.612903	0.0886724	0	0.0109121	2050143	0	0	34.5714	34.9444	8	6	59	64	6	17	chr17	78516751	78518750	2000	*	shore:39188	NA	NA	NA	hg19_cpg_shores	438
AR_ctr	CD4 mem	chr2	236243482	236243482	1	4	57	Open Sea	NA	NA	NA	NA	0.923185	0.800759	0.122425	0.202889	5.55e-06	1	0.794118	0.0731973	0.964286	0.25	0.178579	0	0.0109205	1248654	0	0	26.5714	28	9	4	39	55	6	17	chr2	235964359	236397732	433374	*	intergenic:2721	NA	NA	NA	hg19_genes_intergenic	159249
AR_ctr	CD4 mem	chr2	236243482	236243482	1	4	57	Open Sea	NA	NA	NA	NA	0.923185	0.800759	0.122425	0.202889	5.55e-06	1	0.794118	0.0731973	0.964286	0.25	0.178579	0	0.0109205	1248654	0	0	26.5714	28	9	4	39	55	6	17	chr2	235955815	236289300	333486	*	inter:3065	NA	NA	NA	hg19_cpg_inter	159249
AR_ctr	CD4 mem	chr5	58938472	58938472	1	1	47	Open Sea	NA	NA	NA	NA	0.798073	0.633381	0.164692	0.328812	5.56e-06	1	0.545455	0.173686	0.944444	0.135135	0.210263	0	0.0109214	907154	0	0	15.8571	17.7222	1	3	29	37	6	13	chr5	58511795	59064072	552278	-	intron:192261	uc003jry.3	5144	PDE4D	hg19_genes_introns	785342
AR_ctr	CD4 mem	chr5	58938472	58938472	1	1	47	Open Sea	NA	NA	NA	NA	0.798073	0.633381	0.164692	0.328812	5.56e-06	1	0.545455	0.173686	0.944444	0.135135	0.210263	0	0.0109214	907154	0	0	15.8571	17.7222	1	3	29	37	6	13	chr5	58511795	59064072	552278	-	intron:192275	uc003jrz.3	5144	PDE4D	hg19_genes_introns	785342
AR_ctr	CD4 mem	chr5	58938472	58938472	1	1	47	Open Sea	NA	NA	NA	NA	0.798073	0.633381	0.164692	0.328812	5.56e-06	1	0.545455	0.173686	0.944444	0.135135	0.210263	0	0.0109214	907154	0	0	15.8571	17.7222	1	3	29	37	6	13	chr5	58511795	59188994	677200	-	intron:192289	uc003jsa.2	5144	PDE4D	hg19_genes_introns	785342
AR_ctr	CD4 mem	chr5	58938472	58938472	1	1	47	Open Sea	NA	NA	NA	NA	0.798073	0.633381	0.164692	0.328812	5.56e-06	1	0.545455	0.173686	0.944444	0.135135	0.210263	0	0.0109214	907154	0	0	15.8571	17.7222	1	3	29	37	6	13	chr5	58511795	59284314	772520	-	intron:192303	uc003jsb.3	5144	PDE4D	hg19_genes_introns	785342
AR_ctr	CD4 mem	chr5	58938472	58938472	1	1	47	Open Sea	NA	NA	NA	NA	0.798073	0.633381	0.164692	0.328812	5.56e-06	1	0.545455	0.173686	0.944444	0.135135	0.210263	0	0.0109214	907154	0	0	15.8571	17.7222	1	3	29	37	6	13	chr5	58511795	59064072	552278	-	intron:192314	uc003jsc.3	5144	PDE4D	hg19_genes_introns	785342
AR_ctr	CD4 mem	chr5	58938472	58938472	1	1	47	Open Sea	NA	NA	NA	NA	0.798073	0.633381	0.164692	0.328812	5.56e-06	1	0.545455	0.173686	0.944444	0.135135	0.210263	0	0.0109214	907154	0	0	15.8571	17.7222	1	3	29	37	6	13	chr5	58339882	59185046	845165	*	inter:5143	NA	NA	NA	hg19_cpg_inter	785342
AR_ctr	CD4 mem	chr1	48289110	48289110	1	2	64	Open Sea	NA	NA	NA	NA	0.802898	0.693233	0.109665	0.209072	5.58e-06	1	0.53125	0.18817	0.941176	0.181818	0.197598	0	0.0109551	1224985	0	0	22.1429	24.2222	2	9	34	41	6	17	chr1	48267292	48459705	192414	-	intron:43757	uc021ong.1	388630	TRABD2B	hg19_genes_introns	387420
AR_ctr	CD4 mem	chr1	48289110	48289110	1	2	64	Open Sea	NA	NA	NA	NA	0.802898	0.693233	0.109665	0.209072	5.58e-06	1	0.53125	0.18817	0.941176	0.181818	0.197598	0	0.0109551	1224985	0	0	22.1429	24.2222	2	9	34	41	6	17	chr1	48194993	48445870	250878	*	inter:755	NA	NA	NA	hg19_cpg_inter	387420
AR_ctr	CD4 mem	chr2	232789081	232789081	1	4	59	Shore	NA	NA	NA	NA	0.958455	0.943423	0.0150318	0.0225682	5.59e-06	1	0.916667	0.0352153	1	0.844156	0.0410438	0	0.0109856	2941227	0	0	53.5714	54.8889	10	28	94	83	7	18	chr2	232787026	232790114	3089	-	intron:111941	uc002vsl.2	4880	NPPC	hg19_genes_introns	37210
AR_ctr	CD4 mem	chr2	232789081	232789081	1	4	59	Shore	NA	NA	NA	NA	0.958455	0.943423	0.0150318	0.0225682	5.59e-06	1	0.916667	0.0352153	1	0.844156	0.0410438	0	0.0109856	2941227	0	0	53.5714	54.8889	10	28	94	83	7	18	chr2	232787996	232789995	2000	*	shore:7268	NA	NA	NA	hg19_cpg_shores	37210
AR_ctr	CD4 mem	chr4	847689	847689	1	6	62	Open Sea	NA	NA	NA	NA	0.836518	0.772592	0.0639259	0.11328	5.61e-06	1	0.681818	0.12646	0.90625	0.636364	0.0834688	0	0.0109964	1746815	0	0	17.1429	22.1667	2	10	30	37	6	18	chr4	845763	853393	7631	-	intron:163222	uc010ibj.3	2580	GAK	hg19_genes_introns	78571
AR_ctr	CD4 mem	chr4	847689	847689	1	6	62	Open Sea	NA	NA	NA	NA	0.836518	0.772592	0.0639259	0.11328	5.61e-06	1	0.681818	0.12646	0.90625	0.636364	0.0834688	0	0.0109964	1746815	0	0	17.1429	22.1667	2	10	30	37	6	18	chr4	845763	853393	7631	-	intron:163232	uc003gbl.4	2580	GAK	hg19_genes_introns	78571
AR_ctr	CD4 mem	chr4	847689	847689	1	6	62	Open Sea	NA	NA	NA	NA	0.836518	0.772592	0.0639259	0.11328	5.61e-06	1	0.681818	0.12646	0.90625	0.636364	0.0834688	0	0.0109964	1746815	0	0	17.1429	22.1667	2	10	30	37	6	18	chr4	845763	853393	7631	-	intron:163256	uc003gbm.4	2580	GAK	hg19_genes_introns	78571
AR_ctr	CD4 mem	chr4	847689	847689	1	6	62	Open Sea	NA	NA	NA	NA	0.836518	0.772592	0.0639259	0.11328	5.61e-06	1	0.681818	0.12646	0.90625	0.636364	0.0834688	0	0.0109964	1746815	0	0	17.1429	22.1667	2	10	30	37	6	18	chr4	845763	853393	7631	-	intron:163283	uc003gbn.4	2580	GAK	hg19_genes_introns	78571
AR_ctr	CD4 mem	chr4	847689	847689	1	6	62	Open Sea	NA	NA	NA	NA	0.836518	0.772592	0.0639259	0.11328	5.61e-06	1	0.681818	0.12646	0.90625	0.636364	0.0834688	0	0.0109964	1746815	0	0	17.1429	22.1667	2	10	30	37	6	18	chr4	845937	847936	2000	*	shelf:8733	NA	NA	NA	hg19_cpg_shelves	78571
AR_ctr	CD4 mem	chr10	43931173	43931173	1	6	64	Open Sea	NA	NA	NA	NA	0.960165	0.856729	0.103436	0.162649	5.64e-06	1	0.846154	0.0685392	0.979592	0.555556	0.106276	0	0.0110492	1427309	0	0	20.8571	21.8333	11	6	32	49	7	16	chr10	43927574	43931573	4000	+	1to5kb:37980	uc010qfb.1	642819	ZNF487	hg19_genes_1to5kb	1399
AR_ctr	CD4 mem	chr10	43931173	43931173	1	6	64	Open Sea	NA	NA	NA	NA	0.960165	0.856729	0.103436	0.162649	5.64e-06	1	0.846154	0.0685392	0.979592	0.555556	0.106276	0	0.0110492	1427309	0	0	20.8571	21.8333	11	6	32	49	7	16	chr10	43929959	43931958	2000	*	shore:23704	NA	NA	NA	hg19_cpg_shores	1399
AR_ctr	CD4 mem	chr7	102222845	102222845	1	4	70	Open Sea	NA	NA	NA	NA	0.901263	0.813185	0.0880778	0.14665	5.65e-06	1	0.807692	0.077475	0.964286	0.666667	0.0943886	0	0.0110496	1517538	0	0	19.1429	18.1667	1	6	36	34	6	14	chr7	102221259	102225258	4000	-	1to5kb:31114	uc010lif.1	NA	NA	hg19_genes_1to5kb	10156
AR_ctr	CD4 mem	chr7	102222845	102222845	1	4	70	Open Sea	NA	NA	NA	NA	0.901263	0.813185	0.0880778	0.14665	5.65e-06	1	0.807692	0.077475	0.964286	0.666667	0.0943886	0	0.0110496	1517538	0	0	19.1429	18.1667	1	6	36	34	6	14	chr7	102220093	102223339	3247	-	exon:287511	uc011kky.2	10156	RASA4	hg19_genes_exons	10156
AR_ctr	CD4 mem	chr7	102222845	102222845	1	4	70	Open Sea	NA	NA	NA	NA	0.901263	0.813185	0.0880778	0.14665	5.65e-06	1	0.807692	0.077475	0.964286	0.666667	0.0943886	0	0.0110496	1517538	0	0	19.1429	18.1667	1	6	36	34	6	14	chr7	102220093	102223339	3247	-	exon:287516	uc011kkz.2	10156	RASA4	hg19_genes_exons	10156
AR_ctr	CD4 mem	chr7	102222845	102222845	1	4	70	Open Sea	NA	NA	NA	NA	0.901263	0.813185	0.0880778	0.14665	5.65e-06	1	0.807692	0.077475	0.964286	0.666667	0.0943886	0	0.0110496	1517538	0	0	19.1429	18.1667	1	6	36	34	6	14	chr7	102220093	102223339	3247	-	exon:287536	uc011kla.2	10156	RASA4	hg19_genes_exons	10156
AR_ctr	CD4 mem	chr7	102222845	102222845	1	4	70	Open Sea	NA	NA	NA	NA	0.901263	0.813185	0.0880778	0.14665	5.65e-06	1	0.807692	0.077475	0.964286	0.666667	0.0943886	0	0.0110496	1517538	0	0	19.1429	18.1667	1	6	36	34	6	14	chr7	102220093	102223339	3247	-	exon:287557	uc010lig.3	10156	RASA4	hg19_genes_exons	10156
AR_ctr	CD4 mem	chr7	102222845	102222845	1	4	70	Open Sea	NA	NA	NA	NA	0.901263	0.813185	0.0880778	0.14665	5.65e-06	1	0.807692	0.077475	0.964286	0.666667	0.0943886	0	0.0110496	1517538	0	0	19.1429	18.1667	1	6	36	34	6	14	chr7	102220093	102223339	3247	-	exon:287578	uc003vae.3	10156	RASA4	hg19_genes_exons	10156
AR_ctr	CD4 mem	chr7	102222845	102222845	1	4	70	Open Sea	NA	NA	NA	NA	0.901263	0.813185	0.0880778	0.14665	5.65e-06	1	0.807692	0.077475	0.964286	0.666667	0.0943886	0	0.0110496	1517538	0	0	19.1429	18.1667	1	6	36	34	6	14	chr7	102220093	102223339	3247	-	exon:287598	uc003vaf.3	10156	RASA4	hg19_genes_exons	10156
AR_ctr	CD4 mem	chr7	102222845	102222845	1	4	70	Open Sea	NA	NA	NA	NA	0.901263	0.813185	0.0880778	0.14665	5.65e-06	1	0.807692	0.077475	0.964286	0.666667	0.0943886	0	0.0110496	1517538	0	0	19.1429	18.1667	1	6	36	34	6	14	chr7	102220093	102223339	3247	-	exon:287624	uc011klb.2	10156	RASA4	hg19_genes_exons	10156
AR_ctr	CD4 mem	chr7	102222845	102222845	1	4	70	Open Sea	NA	NA	NA	NA	0.901263	0.813185	0.0880778	0.14665	5.65e-06	1	0.807692	0.077475	0.964286	0.666667	0.0943886	0	0.0110496	1517538	0	0	19.1429	18.1667	1	6	36	34	6	14	chr7	102220093	102223217	3125	-	3UTR:24368	uc011kkz.2	10156	RASA4	hg19_genes_3UTRs	10156
AR_ctr	CD4 mem	chr7	102222845	102222845	1	4	70	Open Sea	NA	NA	NA	NA	0.901263	0.813185	0.0880778	0.14665	5.65e-06	1	0.807692	0.077475	0.964286	0.666667	0.0943886	0	0.0110496	1517538	0	0	19.1429	18.1667	1	6	36	34	6	14	chr7	102220093	102223217	3125	-	3UTR:24369	uc011kla.2	10156	RASA4	hg19_genes_3UTRs	10156
AR_ctr	CD4 mem	chr7	102222845	102222845	1	4	70	Open Sea	NA	NA	NA	NA	0.901263	0.813185	0.0880778	0.14665	5.65e-06	1	0.807692	0.077475	0.964286	0.666667	0.0943886	0	0.0110496	1517538	0	0	19.1429	18.1667	1	6	36	34	6	14	chr7	102220093	102223217	3125	-	3UTR:24370	uc010lig.3	10156	RASA4	hg19_genes_3UTRs	10156
AR_ctr	CD4 mem	chr7	102222845	102222845	1	4	70	Open Sea	NA	NA	NA	NA	0.901263	0.813185	0.0880778	0.14665	5.65e-06	1	0.807692	0.077475	0.964286	0.666667	0.0943886	0	0.0110496	1517538	0	0	19.1429	18.1667	1	6	36	34	6	14	chr7	102220093	102223217	3125	-	3UTR:24371	uc003vae.3	10156	RASA4	hg19_genes_3UTRs	10156
AR_ctr	CD4 mem	chr7	102222845	102222845	1	4	70	Open Sea	NA	NA	NA	NA	0.901263	0.813185	0.0880778	0.14665	5.65e-06	1	0.807692	0.077475	0.964286	0.666667	0.0943886	0	0.0110496	1517538	0	0	19.1429	18.1667	1	6	36	34	6	14	chr7	102220093	102223217	3125	-	3UTR:24372	uc003vaf.3	10156	RASA4	hg19_genes_3UTRs	10156
AR_ctr	CD4 mem	chr7	102222845	102222845	1	4	70	Open Sea	NA	NA	NA	NA	0.901263	0.813185	0.0880778	0.14665	5.65e-06	1	0.807692	0.077475	0.964286	0.666667	0.0943886	0	0.0110496	1517538	0	0	19.1429	18.1667	1	6	36	34	6	14	chr7	102220093	102223217	3125	-	3UTR:24373	uc011klb.2	10156	RASA4	hg19_genes_3UTRs	10156
AR_ctr	CD4 mem	chr7	102222845	102222845	1	4	70	Open Sea	NA	NA	NA	NA	0.901263	0.813185	0.0880778	0.14665	5.65e-06	1	0.807692	0.077475	0.964286	0.666667	0.0943886	0	0.0110496	1517538	0	0	19.1429	18.1667	1	6	36	34	6	14	chr7	102217263	102229327	12065	*	inter:7478	NA	NA	NA	hg19_cpg_inter	10156
AR_ctr	CD4 mem	chr16	87983585	87983585	1	8	68	Shore	NA	NA	NA	NA	0.846533	0.768711	0.0778216	0.13742	5.7e-06	1	0.6	0.142763	0.923077	0.684211	0.059381	0	0.0111456	1572256	0	0	14.1429	13.8889	5	7	19	21	5	15	chr16	87983238	87984237	1000	+	promoter:58551	uc002fko.1	54971	BANP	hg19_genes_promoters	651
AR_ctr	CD4 mem	chr16	87983585	87983585	1	8	68	Shore	NA	NA	NA	NA	0.846533	0.768711	0.0778216	0.13742	5.7e-06	1	0.6	0.142763	0.923077	0.684211	0.059381	0	0.0111456	1572256	0	0	14.1429	13.8889	5	7	19	21	5	15	chr16	87980038	87984037	4000	+	1to5kb:58552	uc002fkp.3	54971	BANP	hg19_genes_1to5kb	651
AR_ctr	CD4 mem	chr16	87983585	87983585	1	8	68	Shore	NA	NA	NA	NA	0.846533	0.768711	0.0778216	0.13742	5.7e-06	1	0.6	0.142763	0.923077	0.684211	0.059381	0	0.0111456	1572256	0	0	14.1429	13.8889	5	7	19	21	5	15	chr16	87980038	87984037	4000	+	1to5kb:58553	uc002fkq.3	54971	BANP	hg19_genes_1to5kb	651
AR_ctr	CD4 mem	chr16	87983585	87983585	1	8	68	Shore	NA	NA	NA	NA	0.846533	0.768711	0.0778216	0.13742	5.7e-06	1	0.6	0.142763	0.923077	0.684211	0.059381	0	0.0111456	1572256	0	0	14.1429	13.8889	5	7	19	21	5	15	chr16	87980038	87984037	4000	+	1to5kb:58554	uc002fks.4	54971	BANP	hg19_genes_1to5kb	651
AR_ctr	CD4 mem	chr16	87983585	87983585	1	8	68	Shore	NA	NA	NA	NA	0.846533	0.768711	0.0778216	0.13742	5.7e-06	1	0.6	0.142763	0.923077	0.684211	0.059381	0	0.0111456	1572256	0	0	14.1429	13.8889	5	7	19	21	5	15	chr16	87980038	87984037	4000	+	1to5kb:58555	uc010vov.2	54971	BANP	hg19_genes_1to5kb	651
AR_ctr	CD4 mem	chr16	87983585	87983585	1	8	68	Shore	NA	NA	NA	NA	0.846533	0.768711	0.0778216	0.13742	5.7e-06	1	0.6	0.142763	0.923077	0.684211	0.059381	0	0.0111456	1572256	0	0	14.1429	13.8889	5	7	19	21	5	15	chr16	87980038	87984037	4000	+	1to5kb:58556	uc010vow.2	54971	BANP	hg19_genes_1to5kb	651
AR_ctr	CD4 mem	chr16	87983585	87983585	1	8	68	Shore	NA	NA	NA	NA	0.846533	0.768711	0.0778216	0.13742	5.7e-06	1	0.6	0.142763	0.923077	0.684211	0.059381	0	0.0111456	1572256	0	0	14.1429	13.8889	5	7	19	21	5	15	chr16	87982402	87984401	2000	*	shore:36297	NA	NA	NA	hg19_cpg_shores	651
AR_ctr	CD4 mem	chr11	16855453	16855453	1	2	50	Open Sea	NA	NA	NA	NA	0.93237	0.847467	0.0849032	0.136213	5.79e-06	1	0.825	0.0592445	0.976744	0.533333	0.106094	0	0.0112897	1579289	0	0	33.7143	38.2778	6	10	56	99	6	18	chr11	16848138	16863093	14956	-	intron:357731	uc010rcu.1	144100	PLEKHA7	hg19_genes_introns	95304
AR_ctr	CD4 mem	chr11	16855453	16855453	1	2	50	Open Sea	NA	NA	NA	NA	0.93237	0.847467	0.0849032	0.136213	5.79e-06	1	0.825	0.0592445	0.976744	0.533333	0.106094	0	0.0112897	1579289	0	0	33.7143	38.2778	6	10	56	99	6	18	chr11	16848138	16863093	14956	-	intron:357782	uc001mmo.3	144100	PLEKHA7	hg19_genes_introns	95304
AR_ctr	CD4 mem	chr11	16855453	16855453	1	2	50	Open Sea	NA	NA	NA	NA	0.93237	0.847467	0.0849032	0.136213	5.79e-06	1	0.825	0.0592445	0.976744	0.533333	0.106094	0	0.0112897	1579289	0	0	33.7143	38.2778	6	10	56	99	6	18	chr11	16764387	16942392	178006	*	inter:10564	NA	NA	NA	hg19_cpg_inter	95304
AR_ctr	CD4 mem	chr4	39831428	39831428	1	3	53	Open Sea	NA	NA	NA	NA	0.930551	0.83001	0.100541	0.163099	5.83e-06	1	0.73913	0.0897263	0.964286	0.714286	0.079678	0	0.0113635	1425026	0	0	17.7143	17.0556	6	5	37	28	6	16	chr4	39827109	39839475	12367	-	intron:165542	uc003guv.4	23244	PDS5A	hg19_genes_introns	131668
AR_ctr	CD4 mem	chr4	39831428	39831428	1	3	53	Open Sea	NA	NA	NA	NA	0.930551	0.83001	0.100541	0.163099	5.83e-06	1	0.73913	0.0897263	0.964286	0.714286	0.079678	0	0.0113635	1425026	0	0	17.7143	17.0556	6	5	37	28	6	16	chr4	39777310	39974066	196757	*	inter:4415	NA	NA	NA	hg19_cpg_inter	131668
AR_ctr	CD4 mem	chr18	2638311	2638311	1	5	64	Open Sea	NA	NA	NA	NA	0.895559	0.801861	0.0936979	0.157576	5.84e-06	1	0.6	0.13756	0.947368	0.533333	0.115796	0	0.0113657	1453329	0	0	16.7143	16	12	7	32	27	7	17	chr18	2616635	2650885	34251	*	intergenic:13398	NA	NA	NA	hg19_genes_intergenic	17573
AR_ctr	CD4 mem	chr18	2638311	2638311	1	5	64	Open Sea	NA	NA	NA	NA	0.895559	0.801861	0.0936979	0.157576	5.84e-06	1	0.6	0.13756	0.947368	0.533333	0.115796	0	0.0113657	1453329	0	0	16.7143	16	12	7	32	27	7	17	chr18	2575581	2650918	75338	*	inter:16002	NA	NA	NA	hg19_cpg_inter	17573
AR_ctr	CD4 mem	chr6	21589147	21589147	1	9	61	Island	NA	NA	NA	NA	0.0179131	0.00209644	0.0158167	1.20636	5.87e-06	0.0909091	0	0.0346587	0.0377358	0	0.00889442	0	0.0114059	2564142	0	0	24.2857	32.5	8	13	38	60	6	18	chr6	21587724	21589288	1565	*	enhancer:51286	NA	NA	NA	hg19_enhancers_fantom	4823
AR_ctr	CD4 mem	chr6	21589147	21589147	1	9	61	Island	NA	NA	NA	NA	0.0179131	0.00209644	0.0158167	1.20636	5.87e-06	0.0909091	0	0.0346587	0.0377358	0	0.00889442	0	0.0114059	2564142	0	0	24.2857	32.5	8	13	38	60	6	18	chr6	21588972	21592971	4000	+	1to5kb:23837	uc003ndi.3	6659	SOX4	hg19_genes_1to5kb	4823
AR_ctr	CD4 mem	chr6	21589147	21589147	1	9	61	Island	NA	NA	NA	NA	0.0179131	0.00209644	0.0158167	1.20636	5.87e-06	0.0909091	0	0.0346587	0.0377358	0	0.00889442	0	0.0114059	2564142	0	0	24.2857	32.5	8	13	38	60	6	18	chr6	21587422	21589175	1754	*	island:7735	NA	NA	NA	hg19_cpg_islands	4823
AR_ctr	CD4 mem	chr11	116451698	116451698	1	12	67	Island	NA	NA	NA	NA	0.16943	0.193639	-0.024209	-0.182593	5.88e-06	0.421053	0	0.152113	0.411765	0.0333333	0.107361	0	0.0114059	2205506	0	0	14.2857	32.7778	3	12	24	43	5	18	chr11	116354915	116618885	263971	*	intergenic:9675	NA	NA	NA	hg19_genes_intergenic	248924
AR_ctr	CD4 mem	chr11	116451698	116451698	1	12	67	Island	NA	NA	NA	NA	0.16943	0.193639	-0.024209	-0.182593	5.88e-06	0.421053	0	0.152113	0.411765	0.0333333	0.107361	0	0.0114059	2205506	0	0	14.2857	32.7778	3	12	24	43	5	18	chr11	116450660	116451912	1253	*	island:14986	NA	NA	NA	hg19_cpg_islands	248924
AR_ctr	CD4 mem	chr18	20825390	20825390	1	5	59	Open Sea	NA	NA	NA	NA	0.85684	0.728626	0.128213	0.23092	5.88e-06	1	0.727273	0.110648	0.857143	0.526316	0.103044	0	0.0114059	1150544	0	0	11.5714	18.3889	6	13	16	28	5	18	chr18	20794019	20832923	38905	+	intron:527332	uc002kub.2	91768	CABLES1	hg19_genes_introns	89600
AR_ctr	CD4 mem	chr18	20825390	20825390	1	5	59	Open Sea	NA	NA	NA	NA	0.85684	0.728626	0.128213	0.23092	5.88e-06	1	0.727273	0.110648	0.857143	0.526316	0.103044	0	0.0114059	1150544	0	0	11.5714	18.3889	6	13	16	28	5	18	chr18	20817210	20832923	15714	+	intron:527341	uc031rhr.1	91768	CABLES1	hg19_genes_introns	89600
AR_ctr	CD4 mem	chr18	20825390	20825390	1	5	59	Open Sea	NA	NA	NA	NA	0.85684	0.728626	0.128213	0.23092	5.88e-06	1	0.727273	0.110648	0.857143	0.526316	0.103044	0	0.0114059	1150544	0	0	11.5714	18.3889	6	13	16	28	5	18	chr18	20817210	20832923	15714	+	intron:527350	uc002kuc.2	91768	CABLES1	hg19_genes_introns	89600
AR_ctr	CD4 mem	chr18	20825390	20825390	1	5	59	Open Sea	NA	NA	NA	NA	0.85684	0.728626	0.128213	0.23092	5.88e-06	1	0.727273	0.110648	0.857143	0.526316	0.103044	0	0.0114059	1150544	0	0	11.5714	18.3889	6	13	16	28	5	18	chr18	20817210	20832923	15714	+	intron:527359	uc002kud.2	91768	CABLES1	hg19_genes_introns	89600
AR_ctr	CD4 mem	chr18	20825390	20825390	1	5	59	Open Sea	NA	NA	NA	NA	0.85684	0.728626	0.128213	0.23092	5.88e-06	1	0.727273	0.110648	0.857143	0.526316	0.103044	0	0.0114059	1150544	0	0	11.5714	18.3889	6	13	16	28	5	18	chr18	20799220	20889643	90424	-	intron:532040	uc010xaq.2	85019	TMEM241	hg19_genes_introns	89600
AR_ctr	CD4 mem	chr18	20825390	20825390	1	5	59	Open Sea	NA	NA	NA	NA	0.85684	0.728626	0.128213	0.23092	5.88e-06	1	0.727273	0.110648	0.857143	0.526316	0.103044	0	0.0114059	1150544	0	0	11.5714	18.3889	6	13	16	28	5	18	chr18	20721072	21013671	292600	*	inter:16114	NA	NA	NA	hg19_cpg_inter	89600
AR_ctr	CD4 mem	chr10	125652422	125652422	1	4	63	Open Sea	NA	NA	19730	36119	0.88745	0.798229	0.0892207	0.151067	5.89e-06	1	0.741935	0.101737	0.958333	0.592593	0.0988795	0	0.0114087	1487532	0	0	20.5714	29.7222	1	8	33	53	6	17	chr10	125651501	125652500	1000	-	promoter:40765	uc001lhk.1	119587	CPXM2	hg19_genes_promoters	226550
AR_ctr	CD4 mem	chr10	125652422	125652422	1	4	63	Open Sea	NA	NA	19730	36119	0.88745	0.798229	0.0892207	0.151067	5.89e-06	1	0.741935	0.101737	0.958333	0.592593	0.0988795	0	0.0114087	1487532	0	0	20.5714	29.7222	1	8	33	53	6	17	chr10	125639826	125698992	59167	-	intron:335495	uc001lhj.3	119587	CPXM2	hg19_genes_introns	226550
AR_ctr	CD4 mem	chr10	125652422	125652422	1	4	63	Open Sea	NA	NA	19730	36119	0.88745	0.798229	0.0892207	0.151067	5.89e-06	1	0.741935	0.101737	0.958333	0.592593	0.0988795	0	0.0114087	1487532	0	0	20.5714	29.7222	1	8	33	53	6	17	chr10	125651374	125653373	2000	*	shore:24874	NA	NA	NA	hg19_cpg_shores	226550
AR_ctr	CD4 mem	chr11	64983000	64983000	1	1	62	Open Sea	NA	NA	NA	NA	0.781145	0.894819	-0.113674	-0.193686	5.93e-06	0.93617	0.25	0.246642	1	0.69697	0.0823532	0	0.0114783	1284362	0	0	34.7143	31.5	4	4	54	49	6	17	chr11	64981901	64985005	3105	+	intron:345691	uc021qlg.1	440044	SLC22A20P	hg19_genes_introns	1688
AR_ctr	CD4 mem	chr11	64983000	64983000	1	1	62	Open Sea	NA	NA	NA	NA	0.781145	0.894819	-0.113674	-0.193686	5.93e-06	0.93617	0.25	0.246642	1	0.69697	0.0823532	0	0.0114783	1284362	0	0	34.7143	31.5	4	4	54	49	6	17	chr11	64981901	64985005	3105	+	intron:345696	uc021qlh.1	440044	SLC22A20P	hg19_genes_introns	1688
AR_ctr	CD4 mem	chr11	64983000	64983000	1	1	62	Open Sea	NA	NA	NA	NA	0.781145	0.894819	-0.113674	-0.193686	5.93e-06	0.93617	0.25	0.246642	1	0.69697	0.0823532	0	0.0114783	1284362	0	0	34.7143	31.5	4	4	54	49	6	17	chr11	64976405	64989280	12876	*	inter:10867	NA	NA	NA	hg19_cpg_inter	1688
AR_ctr	CD4 mem	chr8	98203533	98203533	1	2	47	Open Sea	NA	NA	NA	NA	0.847684	0.848335	-0.000651008	-0.00109463	5.94e-06	1	0.653846	0.134429	0.962963	0.68	0.0824981	0	0.0114848	3407393	0	1	22.4286	22.8333	17	0	29	52	7	15	chr8	98155723	98285713	129991	*	intergenic:7304	NA	NA	NA	hg19_genes_intergenic	406440
AR_ctr	CD4 mem	chr8	98203533	98203533	1	2	47	Open Sea	NA	NA	NA	NA	0.847684	0.848335	-0.000651008	-0.00109463	5.94e-06	1	0.653846	0.134429	0.962963	0.68	0.0824981	0	0.0114848	3407393	0	1	22.4286	22.8333	17	0	29	52	7	15	chr8	97661944	98285604	623661	*	inter:8343	NA	NA	NA	hg19_cpg_inter	406440
AR_ctr	CD4 mem	chr14	77181660	77181660	1	3	51	Open Sea	NA	NA	NA	NA	0.731137	0.619741	0.111396	0.234981	5.95e-06	1	0.28	0.266373	0.9	0.181818	0.16387	0	0.0114957	1136970	0	0	14.8571	15.9444	6	5	25	37	5	14	chr14	76968181	77190665	222485	*	intergenic:11312	NA	NA	NA	hg19_genes_intergenic	46573
AR_ctr	CD4 mem	chr14	77181660	77181660	1	3	51	Open Sea	NA	NA	NA	NA	0.731137	0.619741	0.111396	0.234981	5.95e-06	1	0.28	0.266373	0.9	0.181818	0.16387	0	0.0114957	1136970	0	0	14.8571	15.9444	6	5	25	37	5	14	chr14	76962075	77223569	261495	*	inter:13064	NA	NA	NA	hg19_cpg_inter	46573
AR_ctr	CD4 mem	chr1	227124391	227124391	1	9	66	Shelf	NA	NA	NA	NA	0.881366	0.770099	0.111266	0.19236	6e-06	1	0.722222	0.101992	0.909091	0.555556	0.103195	0	0.0115748	1289321	0	0	12.5714	14.8889	4	8	18	25	5	16	chr1	227122938	227126937	4000	+	1to5kb:3777	uc010pvp.1	56997	COQ8A	hg19_genes_1to5kb	3545
AR_ctr	CD4 mem	chr1	227124391	227124391	1	9	66	Shelf	NA	NA	NA	NA	0.881366	0.770099	0.111266	0.19236	6e-06	1	0.722222	0.101992	0.909091	0.555556	0.103195	0	0.0115748	1289321	0	0	12.5714	14.8889	4	8	18	25	5	16	chr1	227122938	227126937	4000	+	1to5kb:3778	uc001hqn.1	56997	COQ8A	hg19_genes_1to5kb	3545
AR_ctr	CD4 mem	chr1	227124391	227124391	1	9	66	Shelf	NA	NA	NA	NA	0.881366	0.770099	0.111266	0.19236	6e-06	1	0.722222	0.101992	0.909091	0.555556	0.103195	0	0.0115748	1289321	0	0	12.5714	14.8889	4	8	18	25	5	16	chr1	227122938	227126937	4000	+	1to5kb:3779	uc009xeq.1	56997	COQ8A	hg19_genes_1to5kb	3545
AR_ctr	CD4 mem	chr1	227124391	227124391	1	9	66	Shelf	NA	NA	NA	NA	0.881366	0.770099	0.111266	0.19236	6e-06	1	0.722222	0.101992	0.909091	0.555556	0.103195	0	0.0115748	1289321	0	0	12.5714	14.8889	4	8	18	25	5	16	chr1	227122938	227126937	4000	+	1to5kb:3780	uc010pvq.1	56997	COQ8A	hg19_genes_1to5kb	3545
AR_ctr	CD4 mem	chr1	227124391	227124391	1	9	66	Shelf	NA	NA	NA	NA	0.881366	0.770099	0.111266	0.19236	6e-06	1	0.722222	0.101992	0.909091	0.555556	0.103195	0	0.0115748	1289321	0	0	12.5714	14.8889	4	8	18	25	5	16	chr1	227105362	227127108	21747	+	intron:31291	uc001hqm.1	56997	COQ8A	hg19_genes_introns	3545
AR_ctr	CD4 mem	chr1	227124391	227124391	1	9	66	Shelf	NA	NA	NA	NA	0.881366	0.770099	0.111266	0.19236	6e-06	1	0.722222	0.101992	0.909091	0.555556	0.103195	0	0.0115748	1289321	0	0	12.5714	14.8889	4	8	18	25	5	16	chr1	227123070	227125069	2000	*	shelf:3625	NA	NA	NA	hg19_cpg_shelves	3545
AR_ctr	CD4 mem	chr8	144465284	144465284	1	3	63	Open Sea	NA	NA	NA	NA	0.819795	0.766225	0.0535699	0.09628	6e-06	1	0.567568	0.169917	0.885714	0.5	0.0855972	0	0.0115771	1892297	0	0	22.4286	32.4444	3	12	37	67	6	18	chr8	144464606	144466390	1785	+	exon:303810	uc003yyb.3	114822	RHPN1	hg19_genes_exons	14258
AR_ctr	CD4 mem	chr8	144465284	144465284	1	3	63	Open Sea	NA	NA	NA	NA	0.819795	0.766225	0.0535699	0.09628	6e-06	1	0.567568	0.169917	0.885714	0.5	0.0855972	0	0.0115771	1892297	0	0	22.4286	32.4444	3	12	37	67	6	18	chr8	144464822	144466390	1569	+	3UTR:25722	uc003yyb.3	114822	RHPN1	hg19_genes_3UTRs	14258
AR_ctr	CD4 mem	chr8	144465284	144465284	1	3	63	Open Sea	NA	NA	NA	NA	0.819795	0.766225	0.0535699	0.09628	6e-06	1	0.567568	0.169917	0.885714	0.5	0.0855972	0	0.0115771	1892297	0	0	22.4286	32.4444	3	12	37	67	6	18	chr8	144464955	144466954	2000	*	shelf:17927	NA	NA	NA	hg19_cpg_shelves	14258
AR_ctr	CD4 mem	chr1	22247444	22247444	1	2	58	Open Sea	NA	NA	NA	NA	0.900004	0.867205	0.0327984	0.0529579	6.04e-06	1	0.76	0.103664	0.954545	0.333333	0.140155	0	0.0116285	2398934	0	0	26	24.1111	7	9	34	41	6	17	chr1	22222804	22263647	40844	-	intron:38592	uc001bfj.3	3339	HSPG2	hg19_genes_introns	55972
AR_ctr	CD4 mem	chr1	22247444	22247444	1	2	58	Open Sea	NA	NA	NA	NA	0.900004	0.867205	0.0327984	0.0529579	6.04e-06	1	0.76	0.103664	0.954545	0.333333	0.140155	0	0.0116285	2398934	0	0	26	24.1111	7	9	34	41	6	17	chr1	22222804	22263647	40844	-	intron:38688	uc009vqd.3	3339	HSPG2	hg19_genes_introns	55972
AR_ctr	CD4 mem	chr1	22247444	22247444	1	2	58	Open Sea	NA	NA	NA	NA	0.900004	0.867205	0.0327984	0.0529579	6.04e-06	1	0.76	0.103664	0.954545	0.333333	0.140155	0	0.0116285	2398934	0	0	26	24.1111	7	9	34	41	6	17	chr1	22218120	22347917	129798	*	inter:366	NA	NA	NA	hg19_cpg_inter	55972
AR_ctr	CD4 mem	chr2	109013891	109013891	1	3	48	Open Sea	NA	NA	NA	NA	0.887253	0.868731	0.0185221	0.0300934	6.07e-06	1	0.75	0.104766	0.967742	0.6875	0.0720077	0	0.0116794	2788548	0	0	22.7143	26.5	5	9	40	43	6	17	chr2	109004271	109060576	56306	*	intergenic:2160	NA	NA	NA	hg19_genes_intergenic	19469
AR_ctr	CD4 mem	chr2	109013891	109013891	1	3	48	Open Sea	NA	NA	NA	NA	0.887253	0.868731	0.0185221	0.0300934	6.07e-06	1	0.75	0.104766	0.967742	0.6875	0.0720077	0	0.0116794	2788548	0	0	22.7143	26.5	5	9	40	43	6	17	chr2	108607468	109061509	454042	*	inter:2488	NA	NA	NA	hg19_cpg_inter	19469
AR_ctr	CD4 mem	chr6	162232726	162232726	1	4	61	Open Sea	NA	NA	NA	NA	0.786532	0.683789	0.102743	0.199236	6.08e-06	0.888889	0.666667	0.0842254	0.846154	0.428571	0.101225	0	0.011697	1262607	0	0	17	18.5556	9	5	24	29	6	17	chr6	162206941	162257979	51039	-	intron:231277	uc011egf.2	5071	PRKN	hg19_genes_introns	710660
AR_ctr	CD4 mem	chr6	162232726	162232726	1	4	61	Open Sea	NA	NA	NA	NA	0.786532	0.683789	0.102743	0.199236	6.08e-06	0.888889	0.666667	0.0842254	0.846154	0.428571	0.101225	0	0.011697	1262607	0	0	17	18.5556	9	5	24	29	6	17	chr6	162206941	162394333	187393	-	intron:231280	uc003qtv.4	5071	PRKN	hg19_genes_introns	710660
AR_ctr	CD4 mem	chr6	162232726	162232726	1	4	61	Open Sea	NA	NA	NA	NA	0.786532	0.683789	0.102743	0.199236	6.08e-06	0.888889	0.666667	0.0842254	0.846154	0.428571	0.101225	0	0.011697	1262607	0	0	17	18.5556	9	5	24	29	6	17	chr6	162206941	162394333	187393	-	intron:231288	uc003qtw.4	5071	PRKN	hg19_genes_introns	710660
AR_ctr	CD4 mem	chr6	162232726	162232726	1	4	61	Open Sea	NA	NA	NA	NA	0.786532	0.683789	0.102743	0.199236	6.08e-06	0.888889	0.666667	0.0842254	0.846154	0.428571	0.101225	0	0.011697	1262607	0	0	17	18.5556	9	5	24	29	6	17	chr6	162206941	162394333	187393	-	intron:231297	uc010kkd.3	5071	PRKN	hg19_genes_introns	710660
AR_ctr	CD4 mem	chr6	162232726	162232726	1	4	61	Open Sea	NA	NA	NA	NA	0.786532	0.683789	0.102743	0.199236	6.08e-06	0.888889	0.666667	0.0842254	0.846154	0.428571	0.101225	0	0.011697	1262607	0	0	17	18.5556	9	5	24	29	6	17	chr6	162206941	162394333	187393	-	intron:231306	uc003qtx.4	5071	PRKN	hg19_genes_introns	710660
AR_ctr	CD4 mem	chr6	162232726	162232726	1	4	61	Open Sea	NA	NA	NA	NA	0.786532	0.683789	0.102743	0.199236	6.08e-06	0.888889	0.666667	0.0842254	0.846154	0.428571	0.101225	0	0.011697	1262607	0	0	17	18.5556	9	5	24	29	6	17	chr6	162206941	162394333	187393	-	intron:231317	uc003qty.4	5071	PRKN	hg19_genes_introns	710660
AR_ctr	CD4 mem	chr6	162232726	162232726	1	4	61	Open Sea	NA	NA	NA	NA	0.786532	0.683789	0.102743	0.199236	6.08e-06	0.888889	0.666667	0.0842254	0.846154	0.428571	0.101225	0	0.011697	1262607	0	0	17	18.5556	9	5	24	29	6	17	chr6	162206941	162394333	187393	-	intron:231327	uc003qtz.4	5071	PRKN	hg19_genes_introns	710660
AR_ctr	CD4 mem	chr6	162232726	162232726	1	4	61	Open Sea	NA	NA	NA	NA	0.786532	0.683789	0.102743	0.199236	6.08e-06	0.888889	0.666667	0.0842254	0.846154	0.428571	0.101225	0	0.011697	1262607	0	0	17	18.5556	9	5	24	29	6	17	chr6	162206941	162394333	187393	-	intron:231334	uc021zhs.1	5071	PRKN	hg19_genes_introns	710660
AR_ctr	CD4 mem	chr6	162232726	162232726	1	4	61	Open Sea	NA	NA	NA	NA	0.786532	0.683789	0.102743	0.199236	6.08e-06	0.888889	0.666667	0.0842254	0.846154	0.428571	0.101225	0	0.011697	1262607	0	0	17	18.5556	9	5	24	29	6	17	chr6	162206941	162394333	187393	-	intron:231342	uc021zht.1	5071	PRKN	hg19_genes_introns	710660
AR_ctr	CD4 mem	chr6	162232726	162232726	1	4	61	Open Sea	NA	NA	NA	NA	0.786532	0.683789	0.102743	0.199236	6.08e-06	0.888889	0.666667	0.0842254	0.846154	0.428571	0.101225	0	0.011697	1262607	0	0	17	18.5556	9	5	24	29	6	17	chr6	162206941	162394333	187393	-	intron:231352	uc021zhu.1	5071	PRKN	hg19_genes_introns	710660
AR_ctr	CD4 mem	chr6	162232726	162232726	1	4	61	Open Sea	NA	NA	NA	NA	0.786532	0.683789	0.102743	0.199236	6.08e-06	0.888889	0.666667	0.0842254	0.846154	0.428571	0.101225	0	0.011697	1262607	0	0	17	18.5556	9	5	24	29	6	17	chr6	162206941	162394333	187393	-	intron:231364	uc021zhv.1	5071	PRKN	hg19_genes_introns	710660
AR_ctr	CD4 mem	chr6	162232726	162232726	1	4	61	Open Sea	NA	NA	NA	NA	0.786532	0.683789	0.102743	0.199236	6.08e-06	0.888889	0.666667	0.0842254	0.846154	0.428571	0.101225	0	0.011697	1262607	0	0	17	18.5556	9	5	24	29	6	17	chr6	162206941	162394333	187393	-	intron:231376	uc021zhw.1	5071	PRKN	hg19_genes_introns	710660
AR_ctr	CD4 mem	chr6	162232726	162232726	1	4	61	Open Sea	NA	NA	NA	NA	0.786532	0.683789	0.102743	0.199236	6.08e-06	0.888889	0.666667	0.0842254	0.846154	0.428571	0.101225	0	0.011697	1262607	0	0	17	18.5556	9	5	24	29	6	17	chr6	162206941	162394333	187393	-	intron:231385	uc021zhx.1	5071	PRKN	hg19_genes_introns	710660
AR_ctr	CD4 mem	chr6	162232726	162232726	1	4	61	Open Sea	NA	NA	NA	NA	0.786532	0.683789	0.102743	0.199236	6.08e-06	0.888889	0.666667	0.0842254	0.846154	0.428571	0.101225	0	0.011697	1262607	0	0	17	18.5556	9	5	24	29	6	17	chr6	162206941	162394333	187393	-	intron:231394	uc021zhy.1	5071	PRKN	hg19_genes_introns	710660
AR_ctr	CD4 mem	chr6	162232726	162232726	1	4	61	Open Sea	NA	NA	NA	NA	0.786532	0.683789	0.102743	0.199236	6.08e-06	0.888889	0.666667	0.0842254	0.846154	0.428571	0.101225	0	0.011697	1262607	0	0	17	18.5556	9	5	24	29	6	17	chr6	162206941	162394333	187393	-	intron:231405	uc031sqz.1	5071	PRKN	hg19_genes_introns	710660
AR_ctr	CD4 mem	chr6	162232726	162232726	1	4	61	Open Sea	NA	NA	NA	NA	0.786532	0.683789	0.102743	0.199236	6.08e-06	0.888889	0.666667	0.0842254	0.846154	0.428571	0.101225	0	0.011697	1262607	0	0	17	18.5556	9	5	24	29	6	17	chr6	162206941	162394333	187393	-	intron:231417	uc010kke.1	5071	PRKN	hg19_genes_introns	710660
AR_ctr	CD4 mem	chr6	162232726	162232726	1	4	61	Open Sea	NA	NA	NA	NA	0.786532	0.683789	0.102743	0.199236	6.08e-06	0.888889	0.666667	0.0842254	0.846154	0.428571	0.101225	0	0.011697	1262607	0	0	17	18.5556	9	5	24	29	6	17	chr6	162071690	163144376	1072687	*	inter:6643	NA	NA	NA	hg19_cpg_inter	710660
AR_ctr	CD4 mem	chr10	133148916	133148916	1	3	39	Open Sea	NA	NA	NA	NA	0.980761	0.895633	0.0851289	0.129612	6.13e-06	1	0.95	0.020796	0.980952	0.783784	0.058278	0	0.01178	1624746	0	0	42.2857	62.5556	12	37	66	105	7	18	chr10	133114985	133604733	489749	*	intergenic:8848	NA	NA	NA	hg19_genes_intergenic	599042
AR_ctr	CD4 mem	chr10	133148916	133148916	1	3	39	Open Sea	NA	NA	NA	NA	0.980761	0.895633	0.0851289	0.129612	6.13e-06	1	0.95	0.020796	0.980952	0.783784	0.058278	0	0.01178	1624746	0	0	42.2857	62.5556	12	37	66	105	7	18	chr10	133146843	133314028	167186	*	inter:10315	NA	NA	NA	hg19_cpg_inter	599042
AR_ctr	CD4 mem	chr5	41926492	41926492	1	5	50	Open Sea	NA	NA	NA	NA	0.852566	0.764936	0.0876298	0.154557	6.13e-06	1	0.727273	0.113641	0.9375	0.461538	0.121903	0	0.0117884	1468966	0	0	15.8571	17.3333	7	10	30	27	6	18	chr5	41925601	41927114	1514	+	intron:176569	uc003jmp.3	26272	FBXO4	hg19_genes_introns	1135
AR_ctr	CD4 mem	chr5	41926492	41926492	1	5	50	Open Sea	NA	NA	NA	NA	0.852566	0.764936	0.0876298	0.154557	6.13e-06	1	0.727273	0.113641	0.9375	0.461538	0.121903	0	0.0117884	1468966	0	0	15.8571	17.3333	7	10	30	27	6	18	chr5	41925601	41927114	1514	+	intron:176573	uc003jmq.3	26272	FBXO4	hg19_genes_introns	1135
AR_ctr	CD4 mem	chr5	41926492	41926492	1	5	50	Open Sea	NA	NA	NA	NA	0.852566	0.764936	0.0876298	0.154557	6.13e-06	1	0.727273	0.113641	0.9375	0.461538	0.121903	0	0.0117884	1468966	0	0	15.8571	17.3333	7	10	30	27	6	18	chr5	41925717	41927716	2000	*	shore:12190	NA	NA	NA	hg19_cpg_shores	1135
AR_ctr	CD4 mem	chr19	2979406	2979406	1	6	56	Open Sea	NA	NA	NA	NA	0.989796	0.918533	0.0712631	0.106681	6.14e-06	1	0.928571	0.0269975	1	0.833333	0.051805	0	0.0117957	1799019	0	0	19.5714	28	9	14	27	50	6	18	chr19	2978283	2980097	1815	+	intron:536463	uc002lwt.2	79816	TLE6	hg19_genes_introns	1869
AR_ctr	CD4 mem	chr19	2979406	2979406	1	6	56	Open Sea	NA	NA	NA	NA	0.989796	0.918533	0.0712631	0.106681	6.14e-06	1	0.928571	0.0269975	1	0.833333	0.051805	0	0.0117957	1799019	0	0	19.5714	28	9	14	27	50	6	18	chr19	2977618	2980097	2480	+	intron:536478	uc002lwu.2	79816	TLE6	hg19_genes_introns	1869
AR_ctr	CD4 mem	chr19	2979406	2979406	1	6	56	Open Sea	NA	NA	NA	NA	0.989796	0.918533	0.0712631	0.106681	6.14e-06	1	0.928571	0.0269975	1	0.833333	0.051805	0	0.0117957	1799019	0	0	19.5714	28	9	14	27	50	6	18	chr19	2977472	2979471	2000	*	shore:41100	NA	NA	NA	hg19_cpg_shores	1869
AR_ctr	CD4 mem	chr1	165729772	165729772	1	3	48	Open Sea	NA	NA	NA	NA	0.827012	0.823789	0.00322326	0.00556641	6.16e-06	1	0.444444	0.194072	0.9375	0.625	0.0897501	0	0.0118192	3314146	0	0	13.5714	14.5556	9	5	21	25	5	15	chr1	165728822	165737428	8607	-	intron:57868	uc001gdj.5	54499	TMCO1	hg19_genes_introns	8392
AR_ctr	CD4 mem	chr1	165729772	165729772	1	3	48	Open Sea	NA	NA	NA	NA	0.827012	0.823789	0.00322326	0.00556641	6.16e-06	1	0.444444	0.194072	0.9375	0.625	0.0897501	0	0.0118192	3314146	0	0	13.5714	14.5556	9	5	21	25	5	15	chr1	165728822	165737428	8607	-	intron:57874	uc001gdk.5	54499	TMCO1	hg19_genes_introns	8392
AR_ctr	CD4 mem	chr1	165729772	165729772	1	3	48	Open Sea	NA	NA	NA	NA	0.827012	0.823789	0.00322326	0.00556641	6.16e-06	1	0.444444	0.194072	0.9375	0.625	0.0897501	0	0.0118192	3314146	0	0	13.5714	14.5556	9	5	21	25	5	15	chr1	165728822	165737428	8607	-	intron:57880	uc031prd.1	54499	TMCO1	hg19_genes_introns	8392
AR_ctr	CD4 mem	chr1	165729772	165729772	1	3	48	Open Sea	NA	NA	NA	NA	0.827012	0.823789	0.00322326	0.00556641	6.16e-06	1	0.444444	0.194072	0.9375	0.625	0.0897501	0	0.0118192	3314146	0	0	13.5714	14.5556	9	5	21	25	5	15	chr1	165728822	165737428	8607	-	intron:57886	uc031pre.1	54499	TMCO1	hg19_genes_introns	8392
AR_ctr	CD4 mem	chr1	165729772	165729772	1	3	48	Open Sea	NA	NA	NA	NA	0.827012	0.823789	0.00322326	0.00556641	6.16e-06	1	0.444444	0.194072	0.9375	0.625	0.0897501	0	0.0118192	3314146	0	0	13.5714	14.5556	9	5	21	25	5	15	chr1	165728822	165737428	8607	-	intron:57892	uc001gdn.4	54499	TMCO1	hg19_genes_introns	8392
AR_ctr	CD4 mem	chr1	165729772	165729772	1	3	48	Open Sea	NA	NA	NA	NA	0.827012	0.823789	0.00322326	0.00556641	6.16e-06	1	0.444444	0.194072	0.9375	0.625	0.0897501	0	0.0118192	3314146	0	0	13.5714	14.5556	9	5	21	25	5	15	chr1	165671818	165733832	62015	*	inter:1389	NA	NA	NA	hg19_cpg_inter	8392
AR_ctr	CD4 mem	chr1	164927934	164927934	1	8	52	Open Sea	NA	NA	NA	NA	0.870355	0.789668	0.0806872	0.138685	6.18e-06	1	0.75	0.107106	0.931034	0.555556	0.112538	0	0.0118368	1564640	0	0	12.5714	17.4444	4	7	20	29	5	15	chr1	164854301	165171103	316803	*	intergenic:1145	NA	NA	NA	hg19_genes_intergenic	332660
AR_ctr	CD4 mem	chr1	164927934	164927934	1	8	52	Open Sea	NA	NA	NA	NA	0.870355	0.789668	0.0806872	0.138685	6.18e-06	1	0.75	0.107106	0.931034	0.555556	0.112538	0	0.0118368	1564640	0	0	12.5714	17.4444	4	7	20	29	5	15	chr1	164549918	165082756	532839	*	inter:1383	NA	NA	NA	hg19_cpg_inter	332660
AR_ctr	CD4 mem	chr6	164031500	164031500	1	4	53	Open Sea	NA	NA	NA	NA	0.747563	0.654377	0.0931861	0.189364	6.18e-06	1	0.538462	0.19267	0.904762	0.153846	0.158281	0	0.0118368	1304216	0	0	19.5714	20.5556	7	9	36	39	6	17	chr6	163999629	164087635	88007	*	intergenic:6022	NA	NA	NA	hg19_genes_intergenic	61134
AR_ctr	CD4 mem	chr6	164031500	164031500	1	4	53	Open Sea	NA	NA	NA	NA	0.747563	0.654377	0.0931861	0.189364	6.18e-06	1	0.538462	0.19267	0.904762	0.153846	0.158281	0	0.0118368	1304216	0	0	19.5714	20.5556	7	9	36	39	6	17	chr6	163574815	164047485	472671	*	inter:6646	NA	NA	NA	hg19_cpg_inter	61134
AR_ctr	CD4 mem	chr6	160483500	160483500	1	4	48	Open Sea	NA	NA	NA	NA	0.933393	0.832158	0.101235	0.163767	6.18e-06	1	0.846154	0.0578369	0.969697	0.631579	0.0940541	0	0.0118378	1422017	0	0	18.5714	21	11	12	28	33	7	18	chr6	160482961	160483563	603	+	intron:215423	uc003qta.3	3482	IGF2R	hg19_genes_introns	30612
AR_ctr	CD4 mem	chr6	160483500	160483500	1	4	48	Open Sea	NA	NA	NA	NA	0.933393	0.832158	0.101235	0.163767	6.18e-06	1	0.846154	0.0578369	0.969697	0.631579	0.0940541	0	0.0118378	1422017	0	0	18.5714	21	11	12	28	33	7	18	chr6	160483364	160483763	400	+	intronexonboundary:223724	uc003qta.3	3482	IGF2R	hg19_genes_intronexonboundaries	30612
AR_ctr	CD4 mem	chr6	160483500	160483500	1	4	48	Open Sea	NA	NA	NA	NA	0.933393	0.832158	0.101235	0.163767	6.18e-06	1	0.846154	0.0578369	0.969697	0.631579	0.0940541	0	0.0118378	1422017	0	0	18.5714	21	11	12	28	33	7	18	chr6	160483451	160483850	400	+	exonintronboundary:227426	uc003qta.3	3482	IGF2R	hg19_genes_exonintronboundaries	30612
AR_ctr	CD4 mem	chr6	160483500	160483500	1	4	48	Open Sea	NA	NA	NA	NA	0.933393	0.832158	0.101235	0.163767	6.18e-06	1	0.846154	0.0578369	0.969697	0.631579	0.0940541	0	0.0118378	1422017	0	0	18.5714	21	11	12	28	33	7	18	chr6	160431503	160507936	76434	*	inter:6633	NA	NA	NA	hg19_cpg_inter	30612
AR_ctr	CD4 mem	chr11	91556142	91556142	1	2	54	Open Sea	NA	NA	NA	NA	0.860045	0.784954	0.0750911	0.130219	6.19e-06	1	0.62963	0.127349	0.923077	0.333333	0.138372	0	0.0118456	1620914	0	0	18.5714	19.4444	10	3	30	36	7	16	chr11	90596751	92080261	1483511	*	intergenic:9563	NA	NA	NA	hg19_genes_intergenic	529118
AR_ctr	CD4 mem	chr11	91556142	91556142	1	2	54	Open Sea	NA	NA	NA	NA	0.860045	0.784954	0.0750911	0.130219	6.19e-06	1	0.62963	0.127349	0.923077	0.333333	0.138372	0	0.0118456	1620914	0	0	18.5714	19.4444	10	3	30	36	7	16	chr11	89960359	91953635	1993277	*	inter:11128	NA	NA	NA	hg19_cpg_inter	529118
AR_ctr	CD4 mem	chr18	20990167	20990167	1	4	51	Open Sea	NA	NA	NA	NA	0.871975	0.839678	0.0322978	0.0538229	6.21e-06	1	0.692308	0.11246	0.953488	0.5	0.109066	0	0.0118863	2386950	0	0	13.4286	17.2778	7	2	20	43	5	15	chr18	20965032	21001330	36299	-	intron:532051	uc010xaq.2	85019	TMEM241	hg19_genes_introns	42618
AR_ctr	CD4 mem	chr18	20990167	20990167	1	4	51	Open Sea	NA	NA	NA	NA	0.871975	0.839678	0.0322978	0.0538229	6.21e-06	1	0.692308	0.11246	0.953488	0.5	0.109066	0	0.0118863	2386950	0	0	13.4286	17.2778	7	2	20	43	5	15	chr18	20979612	21001330	21719	-	intron:532067	uc002kuf.3	85019	TMEM241	hg19_genes_introns	42618
AR_ctr	CD4 mem	chr18	20990167	20990167	1	4	51	Open Sea	NA	NA	NA	NA	0.871975	0.839678	0.0322978	0.0538229	6.21e-06	1	0.692308	0.11246	0.953488	0.5	0.109066	0	0.0118863	2386950	0	0	13.4286	17.2778	7	2	20	43	5	15	chr18	20979612	21001330	21719	-	intron:532080	uc002kug.3	85019	TMEM241	hg19_genes_introns	42618
AR_ctr	CD4 mem	chr18	20990167	20990167	1	4	51	Open Sea	NA	NA	NA	NA	0.871975	0.839678	0.0322978	0.0538229	6.21e-06	1	0.692308	0.11246	0.953488	0.5	0.109066	0	0.0118863	2386950	0	0	13.4286	17.2778	7	2	20	43	5	15	chr18	20979612	21010594	30983	-	intron:532091	uc002kuh.3	85019	TMEM241	hg19_genes_introns	42618
AR_ctr	CD4 mem	chr18	20990167	20990167	1	4	51	Open Sea	NA	NA	NA	NA	0.871975	0.839678	0.0322978	0.0538229	6.21e-06	1	0.692308	0.11246	0.953488	0.5	0.109066	0	0.0118863	2386950	0	0	13.4286	17.2778	7	2	20	43	5	15	chr18	20979612	21001330	21719	-	intron:532103	uc010xar.2	85019	TMEM241	hg19_genes_introns	42618
AR_ctr	CD4 mem	chr18	20990167	20990167	1	4	51	Open Sea	NA	NA	NA	NA	0.871975	0.839678	0.0322978	0.0538229	6.21e-06	1	0.692308	0.11246	0.953488	0.5	0.109066	0	0.0118863	2386950	0	0	13.4286	17.2778	7	2	20	43	5	15	chr18	20979612	21001330	21719	-	intron:532118	uc031rhs.1	85019	TMEM241	hg19_genes_introns	42618
AR_ctr	CD4 mem	chr18	20990167	20990167	1	4	51	Open Sea	NA	NA	NA	NA	0.871975	0.839678	0.0322978	0.0538229	6.21e-06	1	0.692308	0.11246	0.953488	0.5	0.109066	0	0.0118863	2386950	0	0	13.4286	17.2778	7	2	20	43	5	15	chr18	20721072	21013671	292600	*	inter:16114	NA	NA	NA	hg19_cpg_inter	42618
AR_ctr	CD4 mem	chr1	28663173	28663173	1	6	56	Open Sea	NA	NA	NA	NA	0.905123	0.852534	0.052589	0.0853843	6.24e-06	1	0.73913	0.104415	0.952381	0.666667	0.0982633	0	0.0119271	1997231	0	0	14.1429	15.6111	5	8	23	28	5	16	chr1	28662479	28691092	28614	*	intergenic:304	NA	NA	NA	hg19_genes_intergenic	7659
AR_ctr	CD4 mem	chr1	28663173	28663173	1	6	56	Open Sea	NA	NA	NA	NA	0.905123	0.852534	0.052589	0.0853843	6.24e-06	1	0.73913	0.104415	0.952381	0.666667	0.0982633	0	0.0119271	1997231	0	0	14.1429	15.6111	5	8	23	28	5	16	chr1	28659668	28692041	32374	*	inter:480	NA	NA	NA	hg19_cpg_inter	7659
AR_ctr	CD4 mem	chr6	73912294	73912294	1	6	56	Open Sea	NA	NA	NA	NA	0.905777	0.878079	0.0276974	0.0443074	6.26e-06	1	0.789474	0.0886181	0.97619	0.782609	0.0586199	0	0.0119571	2535458	0	0	30.5714	30.4444	15	12	52	62	7	18	chr6	73908574	73919470	10897	*	intergenic:5662	NA	NA	NA	hg19_genes_intergenic	60654
AR_ctr	CD4 mem	chr6	73912294	73912294	1	6	56	Open Sea	NA	NA	NA	NA	0.905777	0.878079	0.0276974	0.0443074	6.26e-06	1	0.789474	0.0886181	0.97619	0.782609	0.0586199	0	0.0119571	2535458	0	0	30.5714	30.4444	15	12	52	62	7	18	chr6	73871935	73968819	96885	*	inter:6287	NA	NA	NA	hg19_cpg_inter	60654
AR_ctr	CD4 mem	chr7	72612369	72612369	1	4	57	Open Sea	NA	NA	NA	NA	0.927796	0.881091	0.0467058	0.0737026	6.29e-06	1	0.85	0.0554275	0.96875	0.783784	0.0546746	0	0.0120041	2124002	0	0	20.8571	25.2778	10	16	33	40	7	18	chr7	72442259	72745659	303401	+	intron:237339	uc003twz.2	8468	FKBP6	hg19_genes_introns	22303
AR_ctr	CD4 mem	chr7	72612369	72612369	1	4	57	Open Sea	NA	NA	NA	NA	0.927796	0.881091	0.0467058	0.0737026	6.29e-06	1	0.85	0.0554275	0.96875	0.783784	0.0546746	0	0.0120041	2124002	0	0	20.8571	25.2778	10	16	33	40	7	18	chr7	72612060	72612732	673	+	intron:237398	uc011keq.2	100093631	GTF2IP4	hg19_genes_introns	22303
AR_ctr	CD4 mem	chr7	72612369	72612369	1	4	57	Open Sea	NA	NA	NA	NA	0.927796	0.881091	0.0467058	0.0737026	6.29e-06	1	0.85	0.0554275	0.96875	0.783784	0.0546746	0	0.0120041	2124002	0	0	20.8571	25.2778	10	16	33	40	7	18	chr7	72612060	72612732	673	+	intron:237420	uc003txo.4	100093631	GTF2IP4	hg19_genes_introns	22303
AR_ctr	CD4 mem	chr7	72612369	72612369	1	4	57	Open Sea	NA	NA	NA	NA	0.927796	0.881091	0.0467058	0.0737026	6.29e-06	1	0.85	0.0554275	0.96875	0.783784	0.0546746	0	0.0120041	2124002	0	0	20.8571	25.2778	10	16	33	40	7	18	chr7	72573129	72644653	71525	*	inter:7254	NA	NA	NA	hg19_cpg_inter	22303
AR_ctr	CD4 mem	chr4	2439713	2439713	1	8	70	Open Sea	NA	NA	NA	NA	0.838023	0.746487	0.0915356	0.164787	6.3e-06	1	0.583333	0.178391	0.962963	0.5	0.114863	0	0.0120255	1417149	0	1	21.1429	18.2778	1	0	36	34	6	16	chr4	2438746	2439796	1051	+	intron:152305	uc021xkr.1	402160	CFAP99	hg19_genes_introns	11526
AR_ctr	CD4 mem	chr4	2439713	2439713	1	8	70	Open Sea	NA	NA	NA	NA	0.838023	0.746487	0.0915356	0.164787	6.3e-06	1	0.583333	0.178391	0.962963	0.5	0.114863	0	0.0120255	1417149	0	1	21.1429	18.2778	1	0	36	34	6	16	chr4	2438746	2439796	1051	+	intron:152319	uc003gfa.1	402160	CFAP99	hg19_genes_introns	11526
AR_ctr	CD4 mem	chr4	2439713	2439713	1	8	70	Open Sea	NA	NA	NA	NA	0.838023	0.746487	0.0915356	0.164787	6.3e-06	1	0.583333	0.178391	0.962963	0.5	0.114863	0	0.0120255	1417149	0	1	21.1429	18.2778	1	0	36	34	6	16	chr4	2439597	2439996	400	+	intronexonboundary:158682	uc021xkr.1	402160	CFAP99	hg19_genes_intronexonboundaries	11526
AR_ctr	CD4 mem	chr4	2439713	2439713	1	8	70	Open Sea	NA	NA	NA	NA	0.838023	0.746487	0.0915356	0.164787	6.3e-06	1	0.583333	0.178391	0.962963	0.5	0.114863	0	0.0120255	1417149	0	1	21.1429	18.2778	1	0	36	34	6	16	chr4	2439597	2439996	400	+	intronexonboundary:158683	uc003gfa.1	402160	CFAP99	hg19_genes_intronexonboundaries	11526
AR_ctr	CD4 mem	chr4	2439713	2439713	1	8	70	Open Sea	NA	NA	NA	NA	0.838023	0.746487	0.0915356	0.164787	6.3e-06	1	0.583333	0.178391	0.962963	0.5	0.114863	0	0.0120255	1417149	0	1	21.1429	18.2778	1	0	36	34	6	16	chr4	2439691	2440090	400	+	exonintronboundary:159710	uc021xkr.1	402160	CFAP99	hg19_genes_exonintronboundaries	11526
AR_ctr	CD4 mem	chr4	2439713	2439713	1	8	70	Open Sea	NA	NA	NA	NA	0.838023	0.746487	0.0915356	0.164787	6.3e-06	1	0.583333	0.178391	0.962963	0.5	0.114863	0	0.0120255	1417149	0	1	21.1429	18.2778	1	0	36	34	6	16	chr4	2439691	2440090	400	+	exonintronboundary:159711	uc003gfa.1	402160	CFAP99	hg19_genes_exonintronboundaries	11526
AR_ctr	CD4 mem	chr4	2439713	2439713	1	8	70	Open Sea	NA	NA	NA	NA	0.838023	0.746487	0.0915356	0.164787	6.3e-06	1	0.583333	0.178391	0.962963	0.5	0.114863	0	0.0120255	1417149	0	1	21.1429	18.2778	1	0	36	34	6	16	chr4	2436329	2460006	23678	*	inter:4237	NA	NA	NA	hg19_cpg_inter	11526
AR_ctr	CD4 mem	chr2	177881392	177881392	1	2	49	Open Sea	NA	NA	NA	NA	0.839052	0.795095	0.0439565	0.076693	6.39e-06	1	0.672727	0.128894	0.901639	0.641791	0.0793289	0	0.0121798	2090711	0	0	36.8571	36.5556	10	6	63	83	7	17	chr2	177529495	178072421	542927	*	intergenic:2448	NA	NA	NA	hg19_genes_intergenic	196028
AR_ctr	CD4 mem	chr2	177881392	177881392	1	2	49	Open Sea	NA	NA	NA	NA	0.839052	0.795095	0.0439565	0.076693	6.39e-06	1	0.672727	0.128894	0.901639	0.641791	0.0793289	0	0.0121798	2090711	0	0	36.8571	36.5556	10	6	63	83	7	17	chr2	177506911	178073185	566275	*	inter:2797	NA	NA	NA	hg19_cpg_inter	196028
AR_ctr	CD4 mem	chr1	17553765	17553765	1	2	43	Open Sea	NA	NA	NA	NA	0.903758	0.856095	0.0476625	0.0772861	6.42e-06	1	0.8125	0.0728287	0.954545	0.631579	0.0833749	0	0.0122272	2084223	0	0	30.7143	36.3333	9	19	42	54	6	18	chr1	17552654	17555119	2466	+	intron:4093	uc001bah.1	29943	PADI1	hg19_genes_introns	6009
AR_ctr	CD4 mem	chr1	17553765	17553765	1	2	43	Open Sea	NA	NA	NA	NA	0.903758	0.856095	0.0476625	0.0772861	6.42e-06	1	0.8125	0.0728287	0.954545	0.631579	0.0833749	0	0.0122272	2084223	0	0	30.7143	36.3333	9	19	42	54	6	18	chr1	17480076	17730435	250360	*	inter:306	NA	NA	NA	hg19_cpg_inter	6009
AR_ctr	CD4 mem	chr1	21700382	21700382	1	5	49	Open Sea	NA	NA	NA	NA	0.945938	0.863098	0.0828403	0.130774	6.49e-06	1	0.869565	0.0486768	0.965517	0.666667	0.0767149	0	0.0123495	1617339	0	0	27	25.4444	19	6	36	48	7	17	chr1	21677035	21749600	72566	*	intergenic:217	NA	NA	NA	hg19_genes_intergenic	61449
AR_ctr	CD4 mem	chr1	21700382	21700382	1	5	49	Open Sea	NA	NA	NA	NA	0.945938	0.863098	0.0828403	0.130774	6.49e-06	1	0.869565	0.0486768	0.965517	0.666667	0.0767149	0	0.0123495	1617339	0	0	27	25.4444	19	6	36	48	7	17	chr1	21676320	21750797	74478	*	inter:354	NA	NA	NA	hg19_cpg_inter	61449
AR_ctr	CD4 mem	chr1	240576250	240576250	1	6	50	Open Sea	NA	NA	NA	NA	0.845857	0.762284	0.0835727	0.148238	6.55e-06	1	0.642857	0.142007	0.866667	0.588235	0.0654088	0	0.0124409	1508804	0	0	17.8571	19.6111	8	11	28	32	6	18	chr1	240555863	240601360	45498	+	intron:33085	uc010pyd.2	56776	FMN2	hg19_genes_introns	44542
AR_ctr	CD4 mem	chr1	240576250	240576250	1	6	50	Open Sea	NA	NA	NA	NA	0.845857	0.762284	0.0835727	0.148238	6.55e-06	1	0.642857	0.142007	0.866667	0.588235	0.0654088	0	0.0124409	1508804	0	0	17.8571	19.6111	8	11	28	32	6	18	chr1	240555863	240601360	45498	+	intron:33103	uc010pye.2	56776	FMN2	hg19_genes_introns	44542
AR_ctr	CD4 mem	chr1	240576250	240576250	1	6	50	Open Sea	NA	NA	NA	NA	0.845857	0.762284	0.0835727	0.148238	6.55e-06	1	0.642857	0.142007	0.866667	0.588235	0.0654088	0	0.0124409	1508804	0	0	17.8571	19.6111	8	11	28	32	6	18	chr1	240555863	240601360	45498	+	intron:33121	uc010pyg.2	56776	FMN2	hg19_genes_introns	44542
AR_ctr	CD4 mem	chr1	240576250	240576250	1	6	50	Open Sea	NA	NA	NA	NA	0.845857	0.762284	0.0835727	0.148238	6.55e-06	1	0.642857	0.142007	0.866667	0.588235	0.0654088	0	0.0124409	1508804	0	0	17.8571	19.6111	8	11	28	32	6	18	chr1	240573680	240652253	78574	*	inter:1814	NA	NA	NA	hg19_cpg_inter	44542
AR_ctr	CD4 mem	chr5	82759349	82759349	1	10	57	Open Sea	NA	NA	NA	NA	0.916117	0.837752	0.0783647	0.127552	6.56e-06	1	0.75	0.0890759	0.966667	0.666667	0.0884391	0	0.0124527	1638349	0	0	21	26.0556	6	12	36	45	6	18	chr5	82649580	82762492	112913	*	intergenic:4666	NA	NA	NA	hg19_genes_intergenic	8142
AR_ctr	CD4 mem	chr5	82759349	82759349	1	10	57	Open Sea	NA	NA	NA	NA	0.916117	0.837752	0.0783647	0.127552	6.56e-06	1	0.75	0.0890759	0.966667	0.666667	0.0884391	0	0.0124527	1638349	0	0	21	26.0556	6	12	36	45	6	18	chr5	82377348	82764387	387040	*	inter:5259	NA	NA	NA	hg19_cpg_inter	8142
AR_ctr	CD4 mem	chr5	103854593	103854593	1	8	56	Open Sea	NA	NA	NA	NA	0.930787	0.903463	0.027324	0.0425218	6.61e-06	1	0.875	0.0494597	0.964286	0.810811	0.042777	0	0.0125396	2565684	0	0	34.8571	43.2778	19	18	53	82	7	18	chr5	102903491	104430174	1526684	*	intergenic:4718	NA	NA	NA	hg19_genes_intergenic	580580
AR_ctr	CD4 mem	chr5	103854593	103854593	1	8	56	Open Sea	NA	NA	NA	NA	0.930787	0.903463	0.027324	0.0425218	6.61e-06	1	0.875	0.0494597	0.964286	0.810811	0.042777	0	0.0125396	2565684	0	0	34.8571	43.2778	19	18	53	82	7	18	chr5	102599551	107001130	4401580	*	inter:5304	NA	NA	NA	hg19_cpg_inter	580580
AR_ctr	CD4 mem	chr15	99524444	99524444	1	7	58	Open Sea	NA	NA	NA	NA	0.890807	0.81621	0.074597	0.12471	6.61e-06	1	0.75	0.0913193	0.944444	0.428571	0.118777	0	0.0125399	1656489	0	0	18.8571	23	11	7	22	49	7	17	chr15	99514388	99544415	30028	-	intron:463197	uc002bum.3	145814	PGPEP1L	hg19_genes_introns	47327
AR_ctr	CD4 mem	chr15	99524444	99524444	1	7	58	Open Sea	NA	NA	NA	NA	0.890807	0.81621	0.074597	0.12471	6.61e-06	1	0.75	0.0913193	0.944444	0.428571	0.118777	0	0.0125399	1656489	0	0	18.8571	23	11	7	22	49	7	17	chr15	99514388	99548657	34270	-	intron:463201	uc010bop.3	145814	PGPEP1L	hg19_genes_introns	47327
AR_ctr	CD4 mem	chr15	99524444	99524444	1	7	58	Open Sea	NA	NA	NA	NA	0.890807	0.81621	0.074597	0.12471	6.61e-06	1	0.75	0.0913193	0.944444	0.428571	0.118777	0	0.0125399	1656489	0	0	18.8571	23	11	7	22	49	7	17	chr15	99514388	99548657	34270	-	intron:463204	uc002bun.3	145814	PGPEP1L	hg19_genes_introns	47327
AR_ctr	CD4 mem	chr15	99524444	99524444	1	7	58	Open Sea	NA	NA	NA	NA	0.890807	0.81621	0.074597	0.12471	6.61e-06	1	0.75	0.0913193	0.944444	0.428571	0.118777	0	0.0125399	1656489	0	0	18.8571	23	11	7	22	49	7	17	chr15	99516892	99553978	37087	*	inter:13947	NA	NA	NA	hg19_cpg_inter	47327
AR_ctr	CD4 mem	chr11	47448711	47448711	1	7	62	Open Sea	NA	NA	NA	NA	0.138009	0.286849	-0.14884	-1.00405	6.65e-06	0.311111	0	0.111751	0.573529	0.131579	0.108811	0	0.012593	368577	0	0	42.2857	62	12	22	65	121	7	18	chr11	47448025	47449024	1000	-	promoter:44087	uc001nfh.2	5702	PSMC3	hg19_genes_promoters	18664
AR_ctr	CD4 mem	chr11	47448711	47448711	1	7	62	Open Sea	NA	NA	NA	NA	0.138009	0.286849	-0.14884	-1.00405	6.65e-06	0.311111	0	0.111751	0.573529	0.131579	0.108811	0	0.012593	368577	0	0	42.2857	62	12	22	65	121	7	18	chr11	47448258	47450257	2000	*	shore:26142	NA	NA	NA	hg19_cpg_shores	18664
AR_ctr	CD4 mem	chr18	18823269	18823269	1	9	60	Island	NA	NA	NA	NA	0.0143113	0.0776203	-0.0633091	-1.84964	6.65e-06	0.0769231	0	0.0289376	0.2	0.030303	0.0507084	0	0.012593	1174921	0	0	26.4286	27.7222	4	10	43	43	6	18	chr18	18822355	18945987	123633	+	intron:527096	uc002ktf.1	80000	GREB1L	hg19_genes_introns	1065
AR_ctr	CD4 mem	chr18	18823269	18823269	1	9	60	Island	NA	NA	NA	NA	0.0143113	0.0776203	-0.0633091	-1.84964	6.65e-06	0.0769231	0	0.0289376	0.2	0.030303	0.0507084	0	0.012593	1174921	0	0	26.4286	27.7222	4	10	43	43	6	18	chr18	18822355	18945987	123633	+	intron:527110	uc010dlp.1	80000	GREB1L	hg19_genes_introns	1065
AR_ctr	CD4 mem	chr18	18823269	18823269	1	9	60	Island	NA	NA	NA	NA	0.0143113	0.0776203	-0.0633091	-1.84964	6.65e-06	0.0769231	0	0.0289376	0.2	0.030303	0.0507084	0	0.012593	1174921	0	0	26.4286	27.7222	4	10	43	43	6	18	chr18	18822355	18945987	123633	+	intron:527129	uc010xam.2	80000	GREB1L	hg19_genes_introns	1065
AR_ctr	CD4 mem	chr18	18823269	18823269	1	9	60	Island	NA	NA	NA	NA	0.0143113	0.0776203	-0.0633091	-1.84964	6.65e-06	0.0769231	0	0.0289376	0.2	0.030303	0.0507084	0	0.012593	1174921	0	0	26.4286	27.7222	4	10	43	43	6	18	chr18	18821384	18823349	1966	*	island:21838	NA	NA	NA	hg19_cpg_islands	1065
AR_ctr	CD4 mem	chr15	41883431	41883431	1	1	49	Open Sea	NA	NA	NA	NA	0.812178	0.696468	0.115711	0.218828	6.76e-06	1	0.62963	0.138809	0.869565	0.285714	0.154125	0	0.0127696	1190471	0	0	29.2857	28.8333	12	16	54	44	7	18	chr15	41871537	41908763	37227	*	intergenic:11637	NA	NA	NA	hg19_genes_intergenic	30331
AR_ctr	CD4 mem	chr15	41883431	41883431	1	1	49	Open Sea	NA	NA	NA	NA	0.812178	0.696468	0.115711	0.218828	6.76e-06	1	0.62963	0.138809	0.869565	0.285714	0.154125	0	0.0127696	1190471	0	0	29.2857	28.8333	12	16	54	44	7	18	chr15	41881872	41909333	27462	*	inter:13496	NA	NA	NA	hg19_cpg_inter	30331
AR_ctr	CD4 mem	chr2	110279536	110279536	1	6	70	Open Sea	NA	NA	NA	NA	0.903938	0.815506	0.0884322	0.146818	6.79e-06	1	0.8	0.0947018	0.980392	0.646154	0.0985147	0	0.0128207	1516596	0	0	34	46.7222	13	11	47	78	7	18	chr2	110262208	110300373	38166	*	intergenic:2164	NA	NA	NA	hg19_genes_intergenic	92373
AR_ctr	CD4 mem	chr2	110279536	110279536	1	6	70	Open Sea	NA	NA	NA	NA	0.903938	0.815506	0.0884322	0.146818	6.79e-06	1	0.8	0.0947018	0.980392	0.646154	0.0985147	0	0.0128207	1516596	0	0	34	46.7222	13	11	47	78	7	18	chr2	109750834	110366906	616073	*	inter:2495	NA	NA	NA	hg19_cpg_inter	92373
AR_ctr	CD4 mem	chr2	2698352	2698352	1	3	43	Open Sea	NA	NA	NA	NA	0.937382	0.866727	0.0706554	0.111819	6.79e-06	1	0.777778	0.0759934	0.976744	0.75	0.061243	0	0.0128292	1758091	0	0	36.7143	40.3889	19	21	49	75	7	18	chr2	2340046	2898819	558774	*	intergenic:1656	NA	NA	NA	hg19_genes_intergenic	375347
AR_ctr	CD4 mem	chr2	2698352	2698352	1	3	43	Open Sea	NA	NA	NA	NA	0.937382	0.866727	0.0706554	0.111819	6.79e-06	1	0.777778	0.0759934	0.976744	0.75	0.061243	0	0.0128292	1758091	0	0	36.7143	40.3889	19	21	49	75	7	18	chr2	2658359	2750742	92384	*	inter:1913	NA	NA	NA	hg19_cpg_inter	375347
AR_ctr	CD4 mem	chr12	6654119	6654119	1	7	58	Open Sea	NA	NA	NA	NA	0.853658	0.745771	0.107887	0.192511	6.81e-06	1	0.733333	0.115588	0.96	0.5	0.129484	0	0.0128615	1288825	0	0	16.8571	16.7778	10	2	24	45	7	14	chr12	6650809	6657230	6422	-	intron:388915	uc001qoy.3	25900	IFFO1	hg19_genes_introns	8452
AR_ctr	CD4 mem	chr12	6654119	6654119	1	7	58	Open Sea	NA	NA	NA	NA	0.853658	0.745771	0.107887	0.192511	6.81e-06	1	0.733333	0.115588	0.96	0.5	0.129484	0	0.0128615	1288825	0	0	16.8571	16.7778	10	2	24	45	7	14	chr12	6650809	6657230	6422	-	intron:388925	uc001qoz.2	25900	IFFO1	hg19_genes_introns	8452
AR_ctr	CD4 mem	chr12	6654119	6654119	1	7	58	Open Sea	NA	NA	NA	NA	0.853658	0.745771	0.107887	0.192511	6.81e-06	1	0.733333	0.115588	0.96	0.5	0.129484	0	0.0128615	1288825	0	0	16.8571	16.7778	10	2	24	45	7	14	chr12	6650809	6657230	6422	-	intron:388929	uc001qpa.2	25900	IFFO1	hg19_genes_introns	8452
AR_ctr	CD4 mem	chr12	6654119	6654119	1	7	58	Open Sea	NA	NA	NA	NA	0.853658	0.745771	0.107887	0.192511	6.81e-06	1	0.733333	0.115588	0.96	0.5	0.129484	0	0.0128615	1288825	0	0	16.8571	16.7778	10	2	24	45	7	14	chr12	6650809	6657230	6422	-	intron:388933	uc001qpb.1	25900	IFFO1	hg19_genes_introns	8452
AR_ctr	CD4 mem	chr12	6654119	6654119	1	7	58	Open Sea	NA	NA	NA	NA	0.853658	0.745771	0.107887	0.192511	6.81e-06	1	0.733333	0.115588	0.96	0.5	0.129484	0	0.0128615	1288825	0	0	16.8571	16.7778	10	2	24	45	7	14	chr12	6650809	6657230	6422	-	intron:388938	uc001qpc.2	25900	IFFO1	hg19_genes_introns	8452
AR_ctr	CD4 mem	chr12	6654119	6654119	1	7	58	Open Sea	NA	NA	NA	NA	0.853658	0.745771	0.107887	0.192511	6.81e-06	1	0.733333	0.115588	0.96	0.5	0.129484	0	0.0128615	1288825	0	0	16.8571	16.7778	10	2	24	45	7	14	chr12	6650809	6657230	6422	-	intron:388947	uc001qpe.2	25900	IFFO1	hg19_genes_introns	8452
AR_ctr	CD4 mem	chr12	6654119	6654119	1	7	58	Open Sea	NA	NA	NA	NA	0.853658	0.745771	0.107887	0.192511	6.81e-06	1	0.733333	0.115588	0.96	0.5	0.129484	0	0.0128615	1288825	0	0	16.8571	16.7778	10	2	24	45	7	14	chr12	6650809	6657230	6422	-	intron:388956	uc001qpf.2	25900	IFFO1	hg19_genes_introns	8452
AR_ctr	CD4 mem	chr12	6654119	6654119	1	7	58	Open Sea	NA	NA	NA	NA	0.853658	0.745771	0.107887	0.192511	6.81e-06	1	0.733333	0.115588	0.96	0.5	0.129484	0	0.0128615	1288825	0	0	16.8571	16.7778	10	2	24	45	7	14	chr12	6650809	6657230	6422	-	intron:388965	uc010sfe.2	25900	IFFO1	hg19_genes_introns	8452
AR_ctr	CD4 mem	chr12	6654119	6654119	1	7	58	Open Sea	NA	NA	NA	NA	0.853658	0.745771	0.107887	0.192511	6.81e-06	1	0.733333	0.115588	0.96	0.5	0.129484	0	0.0128615	1288825	0	0	16.8571	16.7778	10	2	24	45	7	14	chr12	6650809	6657230	6422	-	intron:388974	uc001qpg.3	25900	IFFO1	hg19_genes_introns	8452
AR_ctr	CD4 mem	chr12	6654119	6654119	1	7	58	Open Sea	NA	NA	NA	NA	0.853658	0.745771	0.107887	0.192511	6.81e-06	1	0.733333	0.115588	0.96	0.5	0.129484	0	0.0128615	1288825	0	0	16.8571	16.7778	10	2	24	45	7	14	chr12	6651898	6655727	3830	*	shelf:24089	NA	NA	NA	hg19_cpg_shelves	8452
AR_ctr	CD4 mem	chr5	179758205	179758205	1	6	44	Open Sea	NA	NA	NA	NA	0.920967	0.878032	0.0429351	0.0681186	6.83e-06	1	0.823529	0.0792916	0.964286	0.709677	0.0816276	0	0.0128946	2193093	0	0	27.7143	27.2778	7	9	35	37	6	17	chr5	179757835	179758494	660	-	intron:201445	uc003mlw.1	9945	GFPT2	hg19_genes_introns	163210
AR_ctr	CD4 mem	chr5	179758205	179758205	1	6	44	Open Sea	NA	NA	NA	NA	0.920967	0.878032	0.0429351	0.0681186	6.83e-06	1	0.823529	0.0792916	0.964286	0.709677	0.0816276	0	0.0128946	2193093	0	0	27.7143	27.2778	7	9	35	37	6	17	chr5	179745122	179775114	29993	*	inter:5759	NA	NA	NA	hg19_cpg_inter	163210
AR_ctr	CD4 mem	chr16	83964732	83964732	1	4	65	Open Sea	NA	NA	NA	NA	0.764416	0.711323	0.0530935	0.102464	6.87e-06	1	0.461538	0.209349	0.962963	0.424242	0.129568	0	0.0129603	1835971	0	0	26	37.8889	5	17	43	71	6	18	chr16	83949788	83977671	27884	*	intergenic:12513	NA	NA	NA	hg19_genes_intergenic	17938
AR_ctr	CD4 mem	chr16	83964732	83964732	1	4	65	Open Sea	NA	NA	NA	NA	0.764416	0.711323	0.0530935	0.102464	6.87e-06	1	0.461538	0.209349	0.962963	0.424242	0.129568	0	0.0129603	1835971	0	0	26	37.8889	5	17	43	71	6	18	chr16	83937412	83994884	57473	*	inter:14710	NA	NA	NA	hg19_cpg_inter	17938
AR_ctr	CD4 mem	chr16	88265581	88265581	1	2	63	Open Sea	NA	NA	NA	NA	0.8	0.641203	0.158797	0.314814	6.88e-06	1	0.55	0.160728	0.8	0.428571	0.129195	0	0.0129684	936621	0	2	14.8571	17.6667	3	0	24	33	6	15	chr16	88139566	88488878	349313	*	intergenic:12552	NA	NA	NA	hg19_genes_intergenic	228296
AR_ctr	CD4 mem	chr16	88265581	88265581	1	2	63	Open Sea	NA	NA	NA	NA	0.8	0.641203	0.158797	0.314814	6.88e-06	1	0.55	0.160728	0.8	0.428571	0.129195	0	0.0129684	936621	0	2	14.8571	17.6667	3	0	24	33	6	15	chr16	88265331	88266113	783	*	shelf:31219	NA	NA	NA	hg19_cpg_shelves	228296
AR_ctr	CD4 mem	chr8	144810729	144810729	1	12	78	Island	NA	NA	NA	NA	0.218069	0.370334	-0.152265	-0.737794	6.93e-06	0.466667	0	0.175965	0.714286	0.117647	0.134157	0	0.0130194	494313	0	0	16.5714	14.6667	4	7	29	24	5	16	chr8	144808091	144810893	2803	-	CDS:253043	uc003yzk.3	286077	FAM83H	hg19_genes_cds	5579
AR_ctr	CD4 mem	chr8	144810729	144810729	1	12	78	Island	NA	NA	NA	NA	0.218069	0.370334	-0.152265	-0.737794	6.93e-06	0.466667	0	0.175965	0.714286	0.117647	0.134157	0	0.0130194	494313	0	0	16.5714	14.6667	4	7	29	24	5	16	chr8	144807335	144810893	3559	-	exon:314828	uc003yzk.3	286077	FAM83H	hg19_genes_exons	5579
AR_ctr	CD4 mem	chr8	144810729	144810729	1	12	78	Island	NA	NA	NA	NA	0.218069	0.370334	-0.152265	-0.737794	6.93e-06	0.466667	0	0.175965	0.714286	0.117647	0.134157	0	0.0130194	494313	0	0	16.5714	14.6667	4	7	29	24	5	16	chr8	144810694	144811093	400	-	intronexonboundary:293277	uc003yzk.3	286077	FAM83H	hg19_genes_intronexonboundaries	5579
AR_ctr	CD4 mem	chr8	144810729	144810729	1	12	78	Island	NA	NA	NA	NA	0.218069	0.370334	-0.152265	-0.737794	6.93e-06	0.466667	0	0.175965	0.714286	0.117647	0.134157	0	0.0130194	494313	0	0	16.5714	14.6667	4	7	29	24	5	16	chr8	144808222	144810978	2757	*	island:11315	NA	NA	NA	hg19_cpg_islands	5579
AR_ctr	CD4 mem	chr13	20334985	20334985	1	4	49	Open Sea	NA	NA	NA	NA	0.869898	0.834107	0.0357909	0.0599102	6.92e-06	1	0.75	0.102433	0.952381	0.647059	0.0953733	0	0.0130194	2301427	0	0	14.7143	20.0556	8	11	21	29	5	18	chr13	20333559	20346381	12823	-	intron:410811	uc021rgx.1	55269	PSPC1	hg19_genes_introns	114401
AR_ctr	CD4 mem	chr13	20334985	20334985	1	4	49	Open Sea	NA	NA	NA	NA	0.869898	0.834107	0.0357909	0.0599102	6.92e-06	1	0.75	0.102433	0.952381	0.647059	0.0953733	0	0.0130194	2301427	0	0	14.7143	20.0556	8	11	21	29	5	18	chr13	20212253	20352147	139895	*	inter:12303	NA	NA	NA	hg19_cpg_inter	114401
AR_ctr	CD4 mem	chr16	27989502	27989502	1	1	56	Open Sea	NA	NA	NA	NA	0.749273	0.58146	0.167812	0.360337	6.92e-06	1	0.472222	0.206996	0.966667	0.315789	0.161822	0	0.0130194	852021	0	0	20.4286	24.2778	9	6	36	41	6	17	chr16	27974525	28074396	99872	-	intron:482979	uc002doz.2	146395	GSG1L	hg19_genes_introns	114929
AR_ctr	CD4 mem	chr16	27989502	27989502	1	1	56	Open Sea	NA	NA	NA	NA	0.749273	0.58146	0.167812	0.360337	6.92e-06	1	0.472222	0.206996	0.966667	0.315789	0.161822	0	0.0130194	852021	0	0	20.4286	24.2778	9	6	36	41	6	17	chr16	27974525	28074396	99872	-	intron:482984	uc010bya.1	146395	GSG1L	hg19_genes_introns	114929
AR_ctr	CD4 mem	chr16	27989502	27989502	1	1	56	Open Sea	NA	NA	NA	NA	0.749273	0.58146	0.167812	0.360337	6.92e-06	1	0.472222	0.206996	0.966667	0.315789	0.161822	0	0.0130194	852021	0	0	20.4286	24.2778	9	6	36	41	6	17	chr16	27565561	28069817	504257	*	inter:14282	NA	NA	NA	hg19_cpg_inter	114929
AR_ctr	CD4 mem	chr17	10289900	10289900	1	4	46	Open Sea	NA	NA	NA	NA	0.89194	0.819762	0.0721775	0.120333	6.93e-06	1	0.777778	0.0967526	0.944444	0.5	0.096175	0	0.0130194	1693276	0	0	23	23.6111	14	9	33	42	7	16	chr17	10286525	10309464	22940	+	intron:492321	uc002gml.1	NA	NA	hg19_genes_introns	3438
AR_ctr	CD4 mem	chr17	10289900	10289900	1	4	46	Open Sea	NA	NA	NA	NA	0.89194	0.819762	0.0721775	0.120333	6.93e-06	1	0.777778	0.0967526	0.944444	0.5	0.096175	0	0.0130194	1693276	0	0	23	23.6111	14	9	33	42	7	16	chr17	10106441	10537481	431041	*	inter:15061	NA	NA	NA	hg19_cpg_inter	3438
AR_ctr	CD4 mem	chr9	138399954	138399954	1	3	49	Open Sea	NA	NA	NA	NA	0.989553	0.932111	0.0574416	0.0853855	6.95e-06	1	0.94382	0.0211324	0.980769	0.741935	0.0546066	0	0.0130484	1997221	0	0	41.4286	50.2222	15	25	89	81	7	18	chr9	138399294	138403293	4000	-	1to5kb:37401	uc004cfy.3	NA	NA	hg19_genes_1to5kb	7476
AR_ctr	CD4 mem	chr9	138399954	138399954	1	3	49	Open Sea	NA	NA	NA	NA	0.989553	0.932111	0.0574416	0.0853855	6.95e-06	1	0.94382	0.0211324	0.980769	0.741935	0.0546066	0	0.0130484	1997221	0	0	41.4286	50.2222	15	25	89	81	7	18	chr9	138397272	138587283	190012	*	inter:9421	NA	NA	NA	hg19_cpg_inter	7476
AR_ctr	CD4 mem	chr21	34875553	34875553	1	4	48	Open Sea	NA	NA	NA	NA	0.885311	0.810373	0.0749378	0.126109	6.98e-06	1	0.791667	0.0926597	0.947368	0	0.218786	0	0.0131048	1647675	0	0	14.2857	20	5	4	24	104	6	14	chr21	34869024	34876237	7214	*	intergenic:15131	NA	NA	NA	hg19_genes_intergenic	39795
AR_ctr	CD4 mem	chr21	34875553	34875553	1	4	48	Open Sea	NA	NA	NA	NA	0.885311	0.810373	0.0749378	0.126109	6.98e-06	1	0.791667	0.0926597	0.947368	0	0.218786	0	0.0131048	1647675	0	0	14.2857	20	5	4	24	104	6	14	chr21	34868269	34910303	42035	*	inter:18350	NA	NA	NA	hg19_cpg_inter	39795
AR_ctr	CD4 mem	chr1	50880758	50880758	1	3	53	Shelf	NA	NA	NA	NA	0.585424	0.393383	0.192042	0.561769	7.01e-06	1	0.277778	0.318967	0.736842	0.142857	0.169294	0	0.0131503	618357	0	0	10.5714	16.7222	1	6	18	33	5	14	chr1	50667541	50883222	215682	*	intergenic:491	NA	NA	NA	hg19_genes_intergenic	167316
AR_ctr	CD4 mem	chr1	50880758	50880758	1	3	53	Shelf	NA	NA	NA	NA	0.585424	0.393383	0.192042	0.561769	7.01e-06	1	0.277778	0.318967	0.736842	0.142857	0.169294	0	0.0131503	618357	0	0	10.5714	16.7222	1	6	18	33	5	14	chr1	50878917	50880916	2000	*	shore:2001	NA	NA	NA	hg19_cpg_shores	167316
AR_ctr	CD4 mem	chr19	2384104	2384104	1	5	64	Open Sea	NA	NA	NA	NA	0.210764	0.551371	-0.340607	-1.34645	7.08e-06	0.470588	0	0.203072	1	0	0.306867	0	0.0132557	260505	0	0	15.7143	16.4444	1	2	28	36	6	14	chr19	2355101	2384783	29683	*	intergenic:13713	NA	NA	NA	hg19_genes_intergenic	5678
AR_ctr	CD4 mem	chr19	2384104	2384104	1	5	64	Open Sea	NA	NA	NA	NA	0.210764	0.551371	-0.340607	-1.34645	7.08e-06	0.470588	0	0.203072	1	0	0.306867	0	0.0132557	260505	0	0	15.7143	16.4444	1	2	28	36	6	14	chr19	2364754	2420005	55252	*	inter:16456	NA	NA	NA	hg19_cpg_inter	5678
AR_ctr	CD4 mem	chr21	34399360	34399360	1	11	70	Island	NA	NA	NA	NA	0.0891059	0.105956	-0.0168502	-0.226536	7.13e-06	0.352941	0	0.126421	0.212121	0	0.0498281	0	0.0133358	2512777	0	0	29.4286	40.9444	3	7	47	82	6	17	chr21	34399171	34400142	972	+	CDS:523174	uc002yqx.2	10215	OLIG2	hg19_genes_cds	188
AR_ctr	CD4 mem	chr21	34399360	34399360	1	11	70	Island	NA	NA	NA	NA	0.0891059	0.105956	-0.0168502	-0.226536	7.13e-06	0.352941	0	0.126421	0.212121	0	0.0498281	0	0.0133358	2512777	0	0	29.4286	40.9444	3	7	47	82	6	17	chr21	34399171	34400142	972	+	CDS:523175	uc021wil.1	NA	NA	hg19_genes_cds	188
AR_ctr	CD4 mem	chr21	34399360	34399360	1	11	70	Island	NA	NA	NA	NA	0.0891059	0.105956	-0.0168502	-0.226536	7.13e-06	0.352941	0	0.126421	0.212121	0	0.0498281	0	0.0133358	2512777	0	0	29.4286	40.9444	3	7	47	82	6	17	chr21	34399109	34401503	2395	+	exon:656277	uc002yqx.2	10215	OLIG2	hg19_genes_exons	188
AR_ctr	CD4 mem	chr21	34399360	34399360	1	11	70	Island	NA	NA	NA	NA	0.0891059	0.105956	-0.0168502	-0.226536	7.13e-06	0.352941	0	0.126421	0.212121	0	0.0498281	0	0.0133358	2512777	0	0	29.4286	40.9444	3	7	47	82	6	17	chr21	34399171	34400142	972	+	exon:656278	uc021wil.1	NA	NA	hg19_genes_exons	188
AR_ctr	CD4 mem	chr21	34399360	34399360	1	11	70	Island	NA	NA	NA	NA	0.0891059	0.105956	-0.0168502	-0.226536	7.13e-06	0.352941	0	0.126421	0.212121	0	0.0498281	0	0.0133358	2512777	0	0	29.4286	40.9444	3	7	47	82	6	17	chr21	34399171	34400142	972	+	firstexon:72638	uc021wil.1	NA	NA	hg19_genes_firstexons	188
AR_ctr	CD4 mem	chr21	34399360	34399360	1	11	70	Island	NA	NA	NA	NA	0.0891059	0.105956	-0.0168502	-0.226536	7.13e-06	0.352941	0	0.126421	0.212121	0	0.0498281	0	0.0133358	2512777	0	0	29.4286	40.9444	3	7	47	82	6	17	chr21	34395129	34400245	5117	*	island:25639	NA	NA	NA	hg19_cpg_islands	188
AR_ctr	CD4 mem	chr7	100490548	100490548	1	2	51	Shore	NA	NA	NA	NA	0.949802	0.89907	0.0507313	0.0783443	7.13e-06	1	0.88	0.0435431	0.970588	0.740741	0.059063	0	0.0133425	2073289	0	0	36.1429	43.7778	7	21	63	68	6	18	chr7	100488340	100492339	4000	-	1to5kb:31057	uc003uxc.4	402682	UFSP1	hg19_genes_1to5kb	1837
AR_ctr	CD4 mem	chr7	100490548	100490548	1	2	51	Shore	NA	NA	NA	NA	0.949802	0.89907	0.0507313	0.0783443	7.13e-06	1	0.88	0.0435431	0.970588	0.740741	0.059063	0	0.0133425	2073289	0	0	36.1429	43.7778	7	21	63	68	6	18	chr7	100490440	100490785	346	-	intron:256094	uc003uxd.3	43	ACHE	hg19_genes_introns	1837
AR_ctr	CD4 mem	chr7	100490548	100490548	1	2	51	Shore	NA	NA	NA	NA	0.949802	0.89907	0.0507313	0.0783443	7.13e-06	1	0.88	0.0435431	0.970588	0.740741	0.059063	0	0.0133425	2073289	0	0	36.1429	43.7778	7	21	63	68	6	18	chr7	100490440	100490785	346	-	intron:256097	uc003uxe.3	43	ACHE	hg19_genes_introns	1837
AR_ctr	CD4 mem	chr7	100490548	100490548	1	2	51	Shore	NA	NA	NA	NA	0.949802	0.89907	0.0507313	0.0783443	7.13e-06	1	0.88	0.0435431	0.970588	0.740741	0.059063	0	0.0133425	2073289	0	0	36.1429	43.7778	7	21	63	68	6	18	chr7	100490440	100490785	346	-	intron:256101	uc003uxf.3	43	ACHE	hg19_genes_introns	1837
AR_ctr	CD4 mem	chr7	100490548	100490548	1	2	51	Shore	NA	NA	NA	NA	0.949802	0.89907	0.0507313	0.0783443	7.13e-06	1	0.88	0.0435431	0.970588	0.740741	0.059063	0	0.0133425	2073289	0	0	36.1429	43.7778	7	21	63	68	6	18	chr7	100490440	100490785	346	-	intron:256105	uc003uxg.3	43	ACHE	hg19_genes_introns	1837
AR_ctr	CD4 mem	chr7	100490548	100490548	1	2	51	Shore	NA	NA	NA	NA	0.949802	0.89907	0.0507313	0.0783443	7.13e-06	1	0.88	0.0435431	0.970588	0.740741	0.059063	0	0.0133425	2073289	0	0	36.1429	43.7778	7	21	63	68	6	18	chr7	100490176	100490785	610	-	intron:256109	uc003uxh.3	43	ACHE	hg19_genes_introns	1837
AR_ctr	CD4 mem	chr7	100490548	100490548	1	2	51	Shore	NA	NA	NA	NA	0.949802	0.89907	0.0507313	0.0783443	7.13e-06	1	0.88	0.0435431	0.970588	0.740741	0.059063	0	0.0133425	2073289	0	0	36.1429	43.7778	7	21	63	68	6	18	chr7	100490440	100490785	346	-	intron:256113	uc003uxi.3	43	ACHE	hg19_genes_introns	1837
AR_ctr	CD4 mem	chr7	100490548	100490548	1	2	51	Shore	NA	NA	NA	NA	0.949802	0.89907	0.0507313	0.0783443	7.13e-06	1	0.88	0.0435431	0.970588	0.740741	0.059063	0	0.0133425	2073289	0	0	36.1429	43.7778	7	21	63	68	6	18	chr7	100490240	100490639	400	-	intronexonboundary:267153	uc003uxd.3	43	ACHE	hg19_genes_intronexonboundaries	1837
AR_ctr	CD4 mem	chr7	100490548	100490548	1	2	51	Shore	NA	NA	NA	NA	0.949802	0.89907	0.0507313	0.0783443	7.13e-06	1	0.88	0.0435431	0.970588	0.740741	0.059063	0	0.0133425	2073289	0	0	36.1429	43.7778	7	21	63	68	6	18	chr7	100490240	100490639	400	-	intronexonboundary:267154	uc003uxe.3	43	ACHE	hg19_genes_intronexonboundaries	1837
AR_ctr	CD4 mem	chr7	100490548	100490548	1	2	51	Shore	NA	NA	NA	NA	0.949802	0.89907	0.0507313	0.0783443	7.13e-06	1	0.88	0.0435431	0.970588	0.740741	0.059063	0	0.0133425	2073289	0	0	36.1429	43.7778	7	21	63	68	6	18	chr7	100490240	100490639	400	-	intronexonboundary:267155	uc003uxf.3	43	ACHE	hg19_genes_intronexonboundaries	1837
AR_ctr	CD4 mem	chr7	100490548	100490548	1	2	51	Shore	NA	NA	NA	NA	0.949802	0.89907	0.0507313	0.0783443	7.13e-06	1	0.88	0.0435431	0.970588	0.740741	0.059063	0	0.0133425	2073289	0	0	36.1429	43.7778	7	21	63	68	6	18	chr7	100490240	100490639	400	-	intronexonboundary:267156	uc003uxg.3	43	ACHE	hg19_genes_intronexonboundaries	1837
AR_ctr	CD4 mem	chr7	100490548	100490548	1	2	51	Shore	NA	NA	NA	NA	0.949802	0.89907	0.0507313	0.0783443	7.13e-06	1	0.88	0.0435431	0.970588	0.740741	0.059063	0	0.0133425	2073289	0	0	36.1429	43.7778	7	21	63	68	6	18	chr7	100490240	100490639	400	-	intronexonboundary:267157	uc003uxi.3	43	ACHE	hg19_genes_intronexonboundaries	1837
AR_ctr	CD4 mem	chr7	100490548	100490548	1	2	51	Shore	NA	NA	NA	NA	0.949802	0.89907	0.0507313	0.0783443	7.13e-06	1	0.88	0.0435431	0.970588	0.740741	0.059063	0	0.0133425	2073289	0	0	36.1429	43.7778	7	21	63	68	6	18	chr7	100490366	100490862	497	*	shore:18084	NA	NA	NA	hg19_cpg_shores	1837
AR_ctr	CD4 mem	chr7	141435645	141435645	1	10	65	Open Sea	NA	NA	NA	NA	0.841621	0.808488	0.0331339	0.0572518	7.19e-06	1	0.555556	0.162346	0.961538	0.5	0.106262	0	0.0134288	2337212	0	0	21.8571	25.1111	9	6	35	46	6	17	chr7	141433121	141437120	4000	+	1to5kb:29580	uc011kri.2	6742	SSBP1	hg19_genes_1to5kb	2474
AR_ctr	CD4 mem	chr7	141435645	141435645	1	10	65	Open Sea	NA	NA	NA	NA	0.841621	0.808488	0.0331339	0.0572518	7.19e-06	1	0.555556	0.162346	0.961538	0.5	0.106262	0	0.0134288	2337212	0	0	21.8571	25.1111	9	6	35	46	6	17	chr7	141433121	141437120	4000	+	1to5kb:29581	uc003vwo.2	6742	SSBP1	hg19_genes_1to5kb	2474
AR_ctr	CD4 mem	chr7	141435645	141435645	1	10	65	Open Sea	NA	NA	NA	NA	0.841621	0.808488	0.0331339	0.0572518	7.19e-06	1	0.555556	0.162346	0.961538	0.5	0.106262	0	0.0134288	2337212	0	0	21.8571	25.1111	9	6	35	46	6	17	chr7	141433121	141437120	4000	+	1to5kb:29582	uc010lnp.2	6742	SSBP1	hg19_genes_1to5kb	2474
AR_ctr	CD4 mem	chr7	141435645	141435645	1	10	65	Open Sea	NA	NA	NA	NA	0.841621	0.808488	0.0331339	0.0572518	7.19e-06	1	0.555556	0.162346	0.961538	0.5	0.106262	0	0.0134288	2337212	0	0	21.8571	25.1111	9	6	35	46	6	17	chr7	141433121	141437120	4000	+	1to5kb:29583	uc031szg.1	6742	SSBP1	hg19_genes_1to5kb	2474
AR_ctr	CD4 mem	chr7	141435645	141435645	1	10	65	Open Sea	NA	NA	NA	NA	0.841621	0.808488	0.0331339	0.0572518	7.19e-06	1	0.555556	0.162346	0.961538	0.5	0.106262	0	0.0134288	2337212	0	0	21.8571	25.1111	9	6	35	46	6	17	chr7	141433121	141437120	4000	+	1to5kb:29584	uc031szh.1	6742	SSBP1	hg19_genes_1to5kb	2474
AR_ctr	CD4 mem	chr7	141435645	141435645	1	10	65	Open Sea	NA	NA	NA	NA	0.841621	0.808488	0.0331339	0.0572518	7.19e-06	1	0.555556	0.162346	0.961538	0.5	0.106262	0	0.0134288	2337212	0	0	21.8571	25.1111	9	6	35	46	6	17	chr7	141433121	141437120	4000	+	1to5kb:29585	uc031szi.1	6742	SSBP1	hg19_genes_1to5kb	2474
AR_ctr	CD4 mem	chr7	141435645	141435645	1	10	65	Open Sea	NA	NA	NA	NA	0.841621	0.808488	0.0331339	0.0572518	7.19e-06	1	0.555556	0.162346	0.961538	0.5	0.106262	0	0.0134288	2337212	0	0	21.8571	25.1111	9	6	35	46	6	17	chr7	141433407	141437406	4000	+	1to5kb:29586	uc031szj.1	6742	SSBP1	hg19_genes_1to5kb	2474
AR_ctr	CD4 mem	chr7	141435645	141435645	1	10	65	Open Sea	NA	NA	NA	NA	0.841621	0.808488	0.0331339	0.0572518	7.19e-06	1	0.555556	0.162346	0.961538	0.5	0.106262	0	0.0134288	2337212	0	0	21.8571	25.1111	9	6	35	46	6	17	chr7	141427946	141437997	10052	-	intron:260166	uc003vwm.4	285962	WEE2-AS1	hg19_genes_introns	2474
AR_ctr	CD4 mem	chr7	141435645	141435645	1	10	65	Open Sea	NA	NA	NA	NA	0.841621	0.808488	0.0331339	0.0572518	7.19e-06	1	0.555556	0.162346	0.961538	0.5	0.106262	0	0.0134288	2337212	0	0	21.8571	25.1111	9	6	35	46	6	17	chr7	141427946	141437182	9237	-	intron:260171	uc010lnm.2	285962	WEE2-AS1	hg19_genes_introns	2474
AR_ctr	CD4 mem	chr7	141435645	141435645	1	10	65	Open Sea	NA	NA	NA	NA	0.841621	0.808488	0.0331339	0.0572518	7.19e-06	1	0.555556	0.162346	0.961538	0.5	0.106262	0	0.0134288	2337212	0	0	21.8571	25.1111	9	6	35	46	6	17	chr7	141427946	141437997	10052	-	intron:260176	uc010lnn.2	285962	WEE2-AS1	hg19_genes_introns	2474
AR_ctr	CD4 mem	chr7	141435645	141435645	1	10	65	Open Sea	NA	NA	NA	NA	0.841621	0.808488	0.0331339	0.0572518	7.19e-06	1	0.555556	0.162346	0.961538	0.5	0.106262	0	0.0134288	2337212	0	0	21.8571	25.1111	9	6	35	46	6	17	chr7	141423825	141437997	14173	-	intron:260178	uc010lno.2	285962	WEE2-AS1	hg19_genes_introns	2474
AR_ctr	CD4 mem	chr7	141435645	141435645	1	10	65	Open Sea	NA	NA	NA	NA	0.841621	0.808488	0.0331339	0.0572518	7.19e-06	1	0.555556	0.162346	0.961538	0.5	0.106262	0	0.0134288	2337212	0	0	21.8571	25.1111	9	6	35	46	6	17	chr7	141427946	141437182	9237	-	intron:260183	uc011krh.1	285962	WEE2-AS1	hg19_genes_introns	2474
AR_ctr	CD4 mem	chr7	141435645	141435645	1	10	65	Open Sea	NA	NA	NA	NA	0.841621	0.808488	0.0331339	0.0572518	7.19e-06	1	0.555556	0.162346	0.961538	0.5	0.106262	0	0.0134288	2337212	0	0	21.8571	25.1111	9	6	35	46	6	17	chr7	141434005	141436004	2000	*	shelf:16066	NA	NA	NA	hg19_cpg_shelves	2474
AR_ctr	CD4 mem	chr22	45203102	45203102	1	1	62	Open Sea	NA	NA	NA	NA	0.932644	0.8851	0.0475436	0.0746636	7.21e-06	1	0.736842	0.0926203	1	0.714286	0.0739118	0	0.0134616	2113539	0	0	27.1429	28.1667	6	12	55	46	6	18	chr22	45198045	45210551	12507	+	intron:597281	uc003bfd.3	553158	PRR5-ARHGAP8	hg19_genes_introns	20764
AR_ctr	CD4 mem	chr22	45203102	45203102	1	1	62	Open Sea	NA	NA	NA	NA	0.932644	0.8851	0.0475436	0.0746636	7.21e-06	1	0.736842	0.0926203	1	0.714286	0.0739118	0	0.0134616	2113539	0	0	27.1429	28.1667	6	12	55	46	6	18	chr22	45198045	45204186	6142	+	intron:597294	uc011aqi.2	553158	PRR5-ARHGAP8	hg19_genes_introns	20764
AR_ctr	CD4 mem	chr22	45203102	45203102	1	1	62	Open Sea	NA	NA	NA	NA	0.932644	0.8851	0.0475436	0.0746636	7.21e-06	1	0.736842	0.0926203	1	0.714286	0.0739118	0	0.0134616	2113539	0	0	27.1429	28.1667	6	12	55	46	6	18	chr22	45198045	45204186	6142	+	intron:597306	uc003bfg.1	553158	PRR5-ARHGAP8	hg19_genes_introns	20764
AR_ctr	CD4 mem	chr22	45203102	45203102	1	1	62	Open Sea	NA	NA	NA	NA	0.932644	0.8851	0.0475436	0.0746636	7.21e-06	1	0.736842	0.0926203	1	0.714286	0.0739118	0	0.0134616	2113539	0	0	27.1429	28.1667	6	12	55	46	6	18	chr22	45198045	45204186	6142	+	intron:597311	uc011aqj.2	553158	PRR5-ARHGAP8	hg19_genes_introns	20764
AR_ctr	CD4 mem	chr22	45203102	45203102	1	1	62	Open Sea	NA	NA	NA	NA	0.932644	0.8851	0.0475436	0.0746636	7.21e-06	1	0.736842	0.0926203	1	0.714286	0.0739118	0	0.0134616	2113539	0	0	27.1429	28.1667	6	12	55	46	6	18	chr22	45198045	45204186	6142	+	intron:597325	uc003bfi.3	23779	ARHGAP8	hg19_genes_introns	20764
AR_ctr	CD4 mem	chr22	45203102	45203102	1	1	62	Open Sea	NA	NA	NA	NA	0.932644	0.8851	0.0475436	0.0746636	7.21e-06	1	0.736842	0.0926203	1	0.714286	0.0739118	0	0.0134616	2113539	0	0	27.1429	28.1667	6	12	55	46	6	18	chr22	45198045	45204186	6142	+	intron:597334	uc003bfj.3	23779	ARHGAP8	hg19_genes_introns	20764
AR_ctr	CD4 mem	chr22	45203102	45203102	1	1	62	Open Sea	NA	NA	NA	NA	0.932644	0.8851	0.0475436	0.0746636	7.21e-06	1	0.736842	0.0926203	1	0.714286	0.0739118	0	0.0134616	2113539	0	0	27.1429	28.1667	6	12	55	46	6	18	chr22	45198045	45204186	6142	+	intron:597346	uc003bfk.3	23779	ARHGAP8	hg19_genes_introns	20764
AR_ctr	CD4 mem	chr22	45203102	45203102	1	1	62	Open Sea	NA	NA	NA	NA	0.932644	0.8851	0.0475436	0.0746636	7.21e-06	1	0.736842	0.0926203	1	0.714286	0.0739118	0	0.0134616	2113539	0	0	27.1429	28.1667	6	12	55	46	6	18	chr22	45198045	45204186	6142	+	intron:597357	uc010gzv.3	23779	ARHGAP8	hg19_genes_introns	20764
AR_ctr	CD4 mem	chr22	45203102	45203102	1	1	62	Open Sea	NA	NA	NA	NA	0.932644	0.8851	0.0475436	0.0746636	7.21e-06	1	0.736842	0.0926203	1	0.714286	0.0739118	0	0.0134616	2113539	0	0	27.1429	28.1667	6	12	55	46	6	18	chr22	45182487	45204186	21700	+	intron:597365	uc003bfl.3	23779	ARHGAP8	hg19_genes_introns	20764
AR_ctr	CD4 mem	chr22	45203102	45203102	1	1	62	Open Sea	NA	NA	NA	NA	0.932644	0.8851	0.0475436	0.0746636	7.21e-06	1	0.736842	0.0926203	1	0.714286	0.0739118	0	0.0134616	2113539	0	0	27.1429	28.1667	6	12	55	46	6	18	chr22	45186224	45308218	121995	*	inter:18961	NA	NA	NA	hg19_cpg_inter	20764
AR_ctr	CD4 mem	chr12	6197538	6197538	1	7	60	Open Sea	NA	NA	NA	NA	0.934844	0.915556	0.019288	0.0297559	7.3e-06	1	0.871795	0.0512188	0.96875	0.810811	0.0392128	0	0.0135729	2797150	0	0	22.5714	27.5	5	12	39	43	6	18	chr12	6184718	6204625	19908	-	intron:388764	uc001qnn.1	7450	VWF	hg19_genes_introns	111942
AR_ctr	CD4 mem	chr12	6197538	6197538	1	7	60	Open Sea	NA	NA	NA	NA	0.934844	0.915556	0.019288	0.0297559	7.3e-06	1	0.871795	0.0512188	0.96875	0.810811	0.0392128	0	0.0135729	2797150	0	0	22.5714	27.5	5	12	39	43	6	18	chr12	6184718	6204625	19908	-	intron:388781	uc010set.1	7450	VWF	hg19_genes_introns	111942
AR_ctr	CD4 mem	chr12	6197538	6197538	1	7	60	Open Sea	NA	NA	NA	NA	0.934844	0.915556	0.019288	0.0297559	7.3e-06	1	0.871795	0.0512188	0.96875	0.810811	0.0392128	0	0.0135729	2797150	0	0	22.5714	27.5	5	12	39	43	6	18	chr12	6171259	6305152	133894	*	inter:11445	NA	NA	NA	hg19_cpg_inter	111942
AR_ctr	CD4 mem	chr3	122732459	122732459	1	1	56	Open Sea	NA	NA	NA	NA	0.831249	0.751891	0.0793578	0.142948	7.32e-06	1	0.576923	0.163905	0.928571	0.5	0.123425	0	0.0135827	1539066	0	0	26.2857	33.7778	5	9	41	56	6	17	chr3	122680149	122746310	66162	-	intron:144220	uc003efz.2	54437	SEMA5B	hg19_genes_introns	53395
AR_ctr	CD4 mem	chr3	122732459	122732459	1	1	56	Open Sea	NA	NA	NA	NA	0.831249	0.751891	0.0793578	0.142948	7.32e-06	1	0.576923	0.163905	0.928571	0.5	0.123425	0	0.0135827	1539066	0	0	26.2857	33.7778	5	9	41	56	6	17	chr3	122667557	122746310	78754	-	intron:144241	uc011bju.2	54437	SEMA5B	hg19_genes_introns	53395
AR_ctr	CD4 mem	chr3	122732459	122732459	1	1	56	Open Sea	NA	NA	NA	NA	0.831249	0.751891	0.0793578	0.142948	7.32e-06	1	0.576923	0.163905	0.928571	0.5	0.123425	0	0.0135827	1539066	0	0	26.2857	33.7778	5	9	41	56	6	17	chr3	122680149	122747293	67145	-	intron:144263	uc003ega.2	54437	SEMA5B	hg19_genes_introns	53395
AR_ctr	CD4 mem	chr3	122732459	122732459	1	1	56	Open Sea	NA	NA	NA	NA	0.831249	0.751891	0.0793578	0.142948	7.32e-06	1	0.576923	0.163905	0.928571	0.5	0.123425	0	0.0135827	1539066	0	0	26.2857	33.7778	5	9	41	56	6	17	chr3	122667557	122746310	78754	-	intron:144278	uc010hro.2	54437	SEMA5B	hg19_genes_introns	53395
AR_ctr	CD4 mem	chr3	122732459	122732459	1	1	56	Open Sea	NA	NA	NA	NA	0.831249	0.751891	0.0793578	0.142948	7.32e-06	1	0.576923	0.163905	0.928571	0.5	0.123425	0	0.0135827	1539066	0	0	26.2857	33.7778	5	9	41	56	6	17	chr3	122667557	122746310	78754	-	intron:144288	uc010hrp.2	54437	SEMA5B	hg19_genes_introns	53395
AR_ctr	CD4 mem	chr3	122732459	122732459	1	1	56	Open Sea	NA	NA	NA	NA	0.831249	0.751891	0.0793578	0.142948	7.32e-06	1	0.576923	0.163905	0.928571	0.5	0.123425	0	0.0135827	1539066	0	0	26.2857	33.7778	5	9	41	56	6	17	chr3	122645356	122741183	95828	*	inter:3737	NA	NA	NA	hg19_cpg_inter	53395
AR_ctr	CD4 mem	chr6	40795507	40795507	1	3	48	Open Sea	NA	NA	NA	NA	0.801055	0.644688	0.156367	0.308992	7.32e-06	1	0.5625	0.165631	0.837838	0.4	0.126106	0	0.0135827	948288	0	0	12.1429	18.6111	6	11	19	37	5	18	chr6	40560127	40816939	256813	*	intergenic:5515	NA	NA	NA	hg19_genes_intergenic	26431
AR_ctr	CD4 mem	chr6	40795507	40795507	1	3	48	Open Sea	NA	NA	NA	NA	0.801055	0.644688	0.156367	0.308992	7.32e-06	1	0.5625	0.165631	0.837838	0.4	0.126106	0	0.0135827	948288	0	0	12.1429	18.6111	6	11	19	37	5	18	chr6	40571581	40991802	420222	*	inter:6155	NA	NA	NA	hg19_cpg_inter	26431
AR_ctr	CD4 mem	chr19	684877	684877	1	7	53	Open Sea	NA	NA	NA	NA	0.884341	0.798397	0.0859443	0.145762	7.32e-06	1	0.785714	0.098193	0.928571	0.583333	0.0997104	0	0.0135827	1523050	0	0	15.7143	15.3889	10	8	27	26	7	16	chr19	683393	685545	2153	*	intergenic:13682	NA	NA	NA	hg19_genes_intergenic	4161
AR_ctr	CD4 mem	chr19	684877	684877	1	7	53	Open Sea	NA	NA	NA	NA	0.884341	0.798397	0.0859443	0.145762	7.32e-06	1	0.785714	0.098193	0.928571	0.583333	0.0997104	0	0.0135827	1523050	0	0	15.7143	15.3889	10	8	27	26	7	16	chr19	683577	685576	2000	*	shelf:34692	NA	NA	NA	hg19_cpg_shelves	4161
AR_ctr	CD4 mem	chr19	41642074	41642074	1	6	62	Island	NA	NA	NA	NA	0.69659	0.587225	0.109366	0.2426	7.36e-06	1	0.47619	0.215159	0.793103	0.411765	0.126439	0	0.0136402	1113510	0	0	24.1429	21.3889	2	9	57	52	6	17	chr19	41641762	41642161	400	+	exonintronboundary:575545	uc021uuw.1	NA	NA	hg19_genes_exonintronboundaries	136
AR_ctr	CD4 mem	chr19	41642074	41642074	1	6	62	Island	NA	NA	NA	NA	0.69659	0.587225	0.109366	0.2426	7.36e-06	1	0.47619	0.215159	0.793103	0.411765	0.126439	0	0.0136402	1113510	0	0	24.1429	21.3889	2	9	57	52	6	17	chr19	41641963	41694114	52152	*	intergenic:14211	NA	NA	NA	hg19_genes_intergenic	136
AR_ctr	CD4 mem	chr19	41642074	41642074	1	6	62	Island	NA	NA	NA	NA	0.69659	0.587225	0.109366	0.2426	7.36e-06	1	0.47619	0.215159	0.793103	0.411765	0.126439	0	0.0136402	1113510	0	0	24.1429	21.3889	2	9	57	52	6	17	chr19	41641308	41642082	775	*	island:23962	NA	NA	NA	hg19_cpg_islands	136
AR_ctr	CD4 mem	chr1	20547519	20547519	1	5	54	Open Sea	NA	NA	NA	NA	0.896437	0.86217	0.0342673	0.055598	7.49e-06	1	0.733333	0.102628	1	0.636364	0.0868678	0	0.0138315	2361913	0	0	16.8571	21.4444	9	11	26	37	6	18	chr1	20519943	20612411	92469	*	intergenic:206	NA	NA	NA	hg19_genes_intergenic	30463
AR_ctr	CD4 mem	chr1	20547519	20547519	1	5	54	Open Sea	NA	NA	NA	NA	0.896437	0.86217	0.0342673	0.055598	7.49e-06	1	0.733333	0.102628	1	0.636364	0.0868678	0	0.0138315	2361913	0	0	16.8571	21.4444	9	11	26	37	6	18	chr1	20516798	20565455	48658	*	inter:338	NA	NA	NA	hg19_cpg_inter	30463
AR_ctr	CD4 mem	chr1	149616121	149616121	1	5	70	Island	NA	NA	NA	NA	0.120824	0.243009	-0.122185	-0.951565	7.58e-06	0.214286	0	0.0873418	0.444444	0.0833333	0.111966	0	0.0139725	507351	0	0	16.2857	24.6667	3	6	31	39	5	17	chr1	149615691	149616690	1000	-	promoter:6248	uc021oxr.1	NA	NA	hg19_genes_promoters	7511
AR_ctr	CD4 mem	chr1	149616121	149616121	1	5	70	Island	NA	NA	NA	NA	0.120824	0.243009	-0.122185	-0.951565	7.58e-06	0.214286	0	0.0873418	0.444444	0.0833333	0.111966	0	0.0139725	507351	0	0	16.2857	24.6667	3	6	31	39	5	17	chr1	149615765	149616786	1022	+	exon:22070	uc001esk.5	728855	LINC00623	hg19_genes_exons	7511
AR_ctr	CD4 mem	chr1	149616121	149616121	1	5	70	Island	NA	NA	NA	NA	0.120824	0.243009	-0.122185	-0.951565	7.58e-06	0.214286	0	0.0873418	0.444444	0.0833333	0.111966	0	0.0139725	507351	0	0	16.2857	24.6667	3	6	31	39	5	17	chr1	149616112	149616545	434	+	intron:19752	uc001esl.5	728855	LINC00623	hg19_genes_introns	7511
AR_ctr	CD4 mem	chr1	149616121	149616121	1	5	70	Island	NA	NA	NA	NA	0.120824	0.243009	-0.122185	-0.951565	7.58e-06	0.214286	0	0.0873418	0.444444	0.0833333	0.111966	0	0.0139725	507351	0	0	16.2857	24.6667	3	6	31	39	5	17	chr1	149577663	149670208	92546	+	intron:19754	uc009wlc.3	57234	LINC00869	hg19_genes_introns	7511
AR_ctr	CD4 mem	chr1	149616121	149616121	1	5	70	Island	NA	NA	NA	NA	0.120824	0.243009	-0.122185	-0.951565	7.58e-06	0.214286	0	0.0873418	0.444444	0.0833333	0.111966	0	0.0139725	507351	0	0	16.2857	24.6667	3	6	31	39	5	17	chr1	149576701	149670208	93508	+	intron:19756	uc009wld.3	57234	LINC00869	hg19_genes_introns	7511
AR_ctr	CD4 mem	chr1	149616121	149616121	1	5	70	Island	NA	NA	NA	NA	0.120824	0.243009	-0.122185	-0.951565	7.58e-06	0.214286	0	0.0873418	0.444444	0.0833333	0.111966	0	0.0139725	507351	0	0	16.2857	24.6667	3	6	31	39	5	17	chr1	149576701	149670208	93508	+	intron:19758	uc031poo.1	57234	LINC00869	hg19_genes_introns	7511
AR_ctr	CD4 mem	chr1	149616121	149616121	1	5	70	Island	NA	NA	NA	NA	0.120824	0.243009	-0.122185	-0.951565	7.58e-06	0.214286	0	0.0873418	0.444444	0.0833333	0.111966	0	0.0139725	507351	0	0	16.2857	24.6667	3	6	31	39	5	17	chr1	149576701	149671771	95071	+	intron:19761	uc031pop.1	57234	LINC00869	hg19_genes_introns	7511
AR_ctr	CD4 mem	chr1	149616121	149616121	1	5	70	Island	NA	NA	NA	NA	0.120824	0.243009	-0.122185	-0.951565	7.58e-06	0.214286	0	0.0873418	0.444444	0.0833333	0.111966	0	0.0139725	507351	0	0	16.2857	24.6667	3	6	31	39	5	17	chr1	149615911	149616310	400	+	exonintronboundary:22077	uc001esl.5	728855	LINC00623	hg19_genes_exonintronboundaries	7511
AR_ctr	CD4 mem	chr1	149616121	149616121	1	5	70	Island	NA	NA	NA	NA	0.120824	0.243009	-0.122185	-0.951565	7.58e-06	0.214286	0	0.0873418	0.444444	0.0833333	0.111966	0	0.0139725	507351	0	0	16.2857	24.6667	3	6	31	39	5	17	chr1	149615819	149616407	589	*	island:1636	NA	NA	NA	hg19_cpg_islands	7511
AR_ctr	CD4 mem	chr19	18333946	18333946	1	4	58	Shore	NA	NA	NA	NA	0.944939	0.928651	0.0162875	0.0248189	7.61e-06	1	0.868421	0.0493619	0.982143	0.875	0.0292582	0	0.0140196	2895087	0	0	33.8571	35.6111	11	15	49	56	7	18	chr19	18332989	18336988	4000	-	1to5kb:68888	uc002nig.4	5143	PDE4C	hg19_genes_1to5kb	29885
AR_ctr	CD4 mem	chr19	18333946	18333946	1	4	58	Shore	NA	NA	NA	NA	0.944939	0.928651	0.0162875	0.0248189	7.61e-06	1	0.868421	0.0493619	0.982143	0.875	0.0292582	0	0.0140196	2895087	0	0	33.8571	35.6111	11	15	49	56	7	18	chr19	18333043	18337042	4000	-	1to5kb:68889	uc002nih.4	5143	PDE4C	hg19_genes_1to5kb	29885
AR_ctr	CD4 mem	chr19	18333946	18333946	1	4	58	Shore	NA	NA	NA	NA	0.944939	0.928651	0.0162875	0.0248189	7.61e-06	1	0.868421	0.0493619	0.982143	0.875	0.0292582	0	0.0140196	2895087	0	0	33.8571	35.6111	11	15	49	56	7	18	chr19	18332989	18336988	4000	-	1to5kb:68897	uc010ebm.1	5143	PDE4C	hg19_genes_1to5kb	29885
AR_ctr	CD4 mem	chr19	18333946	18333946	1	4	58	Shore	NA	NA	NA	NA	0.944939	0.928651	0.0162875	0.0248189	7.61e-06	1	0.868421	0.0493619	0.982143	0.875	0.0292582	0	0.0140196	2895087	0	0	33.8571	35.6111	11	15	49	56	7	18	chr19	18333134	18335044	1911	-	intron:558278	uc010ebk.3	5143	PDE4C	hg19_genes_introns	29885
AR_ctr	CD4 mem	chr19	18333946	18333946	1	4	58	Shore	NA	NA	NA	NA	0.944939	0.928651	0.0162875	0.0248189	7.61e-06	1	0.868421	0.0493619	0.982143	0.875	0.0292582	0	0.0140196	2895087	0	0	33.8571	35.6111	11	15	49	56	7	18	chr19	18333134	18337079	3946	-	intron:558291	uc002nif.4	5143	PDE4C	hg19_genes_introns	29885
AR_ctr	CD4 mem	chr19	18333946	18333946	1	4	58	Shore	NA	NA	NA	NA	0.944939	0.928651	0.0162875	0.0248189	7.61e-06	1	0.868421	0.0493619	0.982143	0.875	0.0292582	0	0.0140196	2895087	0	0	33.8571	35.6111	11	15	49	56	7	18	chr19	18333134	18337079	3946	-	intron:558305	uc002nii.4	5143	PDE4C	hg19_genes_introns	29885
AR_ctr	CD4 mem	chr19	18333946	18333946	1	4	58	Shore	NA	NA	NA	NA	0.944939	0.928651	0.0162875	0.0248189	7.61e-06	1	0.868421	0.0493619	0.982143	0.875	0.0292582	0	0.0140196	2895087	0	0	33.8571	35.6111	11	15	49	56	7	18	chr19	18333134	18343759	10626	-	intron:558317	uc010ebl.3	5143	PDE4C	hg19_genes_introns	29885
AR_ctr	CD4 mem	chr19	18333946	18333946	1	4	58	Shore	NA	NA	NA	NA	0.944939	0.928651	0.0162875	0.0248189	7.61e-06	1	0.868421	0.0493619	0.982143	0.875	0.0292582	0	0.0140196	2895087	0	0	33.8571	35.6111	11	15	49	56	7	18	chr19	18333134	18343759	10626	-	intron:558331	uc010xqc.2	5143	PDE4C	hg19_genes_introns	29885
AR_ctr	CD4 mem	chr19	18333946	18333946	1	4	58	Shore	NA	NA	NA	NA	0.944939	0.928651	0.0162875	0.0248189	7.61e-06	1	0.868421	0.0493619	0.982143	0.875	0.0292582	0	0.0140196	2895087	0	0	33.8571	35.6111	11	15	49	56	7	18	chr19	18333134	18343759	10626	-	intron:558345	uc002nik.4	5143	PDE4C	hg19_genes_introns	29885
AR_ctr	CD4 mem	chr19	18333946	18333946	1	4	58	Shore	NA	NA	NA	NA	0.944939	0.928651	0.0162875	0.0248189	7.61e-06	1	0.868421	0.0493619	0.982143	0.875	0.0292582	0	0.0140196	2895087	0	0	33.8571	35.6111	11	15	49	56	7	18	chr19	18333134	18343759	10626	-	intron:558360	uc002nil.4	5143	PDE4C	hg19_genes_introns	29885
AR_ctr	CD4 mem	chr19	18333946	18333946	1	4	58	Shore	NA	NA	NA	NA	0.944939	0.928651	0.0162875	0.0248189	7.61e-06	1	0.868421	0.0493619	0.982143	0.875	0.0292582	0	0.0140196	2895087	0	0	33.8571	35.6111	11	15	49	56	7	18	chr19	18333134	18343759	10626	-	intron:558370	uc002nim.1	5143	PDE4C	hg19_genes_introns	29885
AR_ctr	CD4 mem	chr19	18333946	18333946	1	4	58	Shore	NA	NA	NA	NA	0.944939	0.928651	0.0162875	0.0248189	7.61e-06	1	0.868421	0.0493619	0.982143	0.875	0.0292582	0	0.0140196	2895087	0	0	33.8571	35.6111	11	15	49	56	7	18	chr19	18331396	18335072	3677	*	shore:42502	NA	NA	NA	hg19_cpg_shores	29885
AR_ctr	CD4 mem	chr2	85362119	85362119	1	7	52	Island	NA	NA	NA	NA	0.0386409	0.0825513	-0.0439104	-0.928083	7.69e-06	0.108108	0	0.0457871	0.148515	0.0133333	0.0387715	0	0.0141519	1586288	0	0	49.5714	61.2778	7	16	74	101	6	18	chr2	85362107	85362578	472	*	enhancer:32215	NA	NA	NA	hg19_enhancers_fantom	1535
AR_ctr	CD4 mem	chr2	85362119	85362119	1	7	52	Island	NA	NA	NA	NA	0.0386409	0.0825513	-0.0439104	-0.928083	7.69e-06	0.108108	0	0.0457871	0.148515	0.0133333	0.0387715	0	0.0141519	1586288	0	0	49.5714	61.2778	7	16	74	101	6	18	chr2	85361574	85510617	149044	+	intron:72307	uc002soy.3	83439	TCF7L1	hg19_genes_introns	1535
AR_ctr	CD4 mem	chr2	85362119	85362119	1	7	52	Island	NA	NA	NA	NA	0.0386409	0.0825513	-0.0439104	-0.928083	7.69e-06	0.108108	0	0.0457871	0.148515	0.0133333	0.0387715	0	0.0141519	1586288	0	0	49.5714	61.2778	7	16	74	101	6	18	chr2	85359957	85362593	2637	*	island:3042	NA	NA	NA	hg19_cpg_islands	1535
AR_ctr	CD4 mem	chr1	19029699	19029699	1	8	68	Open Sea	NA	NA	NA	NA	0.206183	0.350681	-0.144498	-0.738472	7.81e-06	0.416667	0	0.168359	0.571429	0.171429	0.122196	0	0.0143256	494006	0	0	18.8571	25.3889	2	8	41	35	6	17	chr1	19029588	19029790	203	+	CDS:4038	uc001bay.3	5081	PAX7	hg19_genes_cds	72198
AR_ctr	CD4 mem	chr1	19029699	19029699	1	8	68	Open Sea	NA	NA	NA	NA	0.206183	0.350681	-0.144498	-0.738472	7.81e-06	0.416667	0	0.168359	0.571429	0.171429	0.122196	0	0.0143256	494006	0	0	18.8571	25.3889	2	8	41	35	6	17	chr1	19029588	19029790	203	+	CDS:4046	uc001baz.3	5081	PAX7	hg19_genes_cds	72198
AR_ctr	CD4 mem	chr1	19029699	19029699	1	8	68	Open Sea	NA	NA	NA	NA	0.206183	0.350681	-0.144498	-0.738472	7.81e-06	0.416667	0	0.168359	0.571429	0.171429	0.122196	0	0.0143256	494006	0	0	18.8571	25.3889	2	8	41	35	6	17	chr1	19029588	19029790	203	+	CDS:4054	uc010oct.2	5081	PAX7	hg19_genes_cds	72198
AR_ctr	CD4 mem	chr1	19029699	19029699	1	8	68	Open Sea	NA	NA	NA	NA	0.206183	0.350681	-0.144498	-0.738472	7.81e-06	0.416667	0	0.168359	0.571429	0.171429	0.122196	0	0.0143256	494006	0	0	18.8571	25.3889	2	8	41	35	6	17	chr1	19029588	19029790	203	+	exon:4896	uc001bay.3	5081	PAX7	hg19_genes_exons	72198
AR_ctr	CD4 mem	chr1	19029699	19029699	1	8	68	Open Sea	NA	NA	NA	NA	0.206183	0.350681	-0.144498	-0.738472	7.81e-06	0.416667	0	0.168359	0.571429	0.171429	0.122196	0	0.0143256	494006	0	0	18.8571	25.3889	2	8	41	35	6	17	chr1	19029588	19029790	203	+	exon:4904	uc001baz.3	5081	PAX7	hg19_genes_exons	72198
AR_ctr	CD4 mem	chr1	19029699	19029699	1	8	68	Open Sea	NA	NA	NA	NA	0.206183	0.350681	-0.144498	-0.738472	7.81e-06	0.416667	0	0.168359	0.571429	0.171429	0.122196	0	0.0143256	494006	0	0	18.8571	25.3889	2	8	41	35	6	17	chr1	19029588	19029790	203	+	exon:4912	uc010oct.2	5081	PAX7	hg19_genes_exons	72198
AR_ctr	CD4 mem	chr1	19029699	19029699	1	8	68	Open Sea	NA	NA	NA	NA	0.206183	0.350681	-0.144498	-0.738472	7.81e-06	0.416667	0	0.168359	0.571429	0.171429	0.122196	0	0.0143256	494006	0	0	18.8571	25.3889	2	8	41	35	6	17	chr1	19029388	19029787	400	+	intronexonboundary:4244	uc001bay.3	5081	PAX7	hg19_genes_intronexonboundaries	72198
AR_ctr	CD4 mem	chr1	19029699	19029699	1	8	68	Open Sea	NA	NA	NA	NA	0.206183	0.350681	-0.144498	-0.738472	7.81e-06	0.416667	0	0.168359	0.571429	0.171429	0.122196	0	0.0143256	494006	0	0	18.8571	25.3889	2	8	41	35	6	17	chr1	19029388	19029787	400	+	intronexonboundary:4245	uc001baz.3	5081	PAX7	hg19_genes_intronexonboundaries	72198
AR_ctr	CD4 mem	chr1	19029699	19029699	1	8	68	Open Sea	NA	NA	NA	NA	0.206183	0.350681	-0.144498	-0.738472	7.81e-06	0.416667	0	0.168359	0.571429	0.171429	0.122196	0	0.0143256	494006	0	0	18.8571	25.3889	2	8	41	35	6	17	chr1	19029388	19029787	400	+	intronexonboundary:4246	uc010oct.2	5081	PAX7	hg19_genes_intronexonboundaries	72198
AR_ctr	CD4 mem	chr1	19029699	19029699	1	8	68	Open Sea	NA	NA	NA	NA	0.206183	0.350681	-0.144498	-0.738472	7.81e-06	0.416667	0	0.168359	0.571429	0.171429	0.122196	0	0.0143256	494006	0	0	18.8571	25.3889	2	8	41	35	6	17	chr1	19029590	19029989	400	+	exonintronboundary:4907	uc001bay.3	5081	PAX7	hg19_genes_exonintronboundaries	72198
AR_ctr	CD4 mem	chr1	19029699	19029699	1	8	68	Open Sea	NA	NA	NA	NA	0.206183	0.350681	-0.144498	-0.738472	7.81e-06	0.416667	0	0.168359	0.571429	0.171429	0.122196	0	0.0143256	494006	0	0	18.8571	25.3889	2	8	41	35	6	17	chr1	19029590	19029989	400	+	exonintronboundary:4908	uc001baz.3	5081	PAX7	hg19_genes_exonintronboundaries	72198
AR_ctr	CD4 mem	chr1	19029699	19029699	1	8	68	Open Sea	NA	NA	NA	NA	0.206183	0.350681	-0.144498	-0.738472	7.81e-06	0.416667	0	0.168359	0.571429	0.171429	0.122196	0	0.0143256	494006	0	0	18.8571	25.3889	2	8	41	35	6	17	chr1	19029590	19029989	400	+	exonintronboundary:4909	uc010oct.2	5081	PAX7	hg19_genes_exonintronboundaries	72198
AR_ctr	CD4 mem	chr1	19029699	19029699	1	8	68	Open Sea	NA	NA	NA	NA	0.206183	0.350681	-0.144498	-0.738472	7.81e-06	0.416667	0	0.168359	0.571429	0.171429	0.122196	0	0.0143256	494006	0	0	18.8571	25.3889	2	8	41	35	6	17	chr1	18977305	19039390	62086	*	inter:318	NA	NA	NA	hg19_cpg_inter	72198
AR_ctr	CD4 mem	chr1	31129691	31129691	1	5	62	Open Sea	NA	NA	NA	NA	0.809569	0.714864	0.0947052	0.177156	7.89e-06	1	0.64	0.153544	0.888889	0.533333	0.105483	0	0.0144463	1356304	0	0	20.8571	26.8889	2	10	40	44	5	18	chr1	30515457	31184123	668667	*	intergenic:316	NA	NA	NA	hg19_genes_intergenic	61926
AR_ctr	CD4 mem	chr1	31129691	31129691	1	5	62	Open Sea	NA	NA	NA	NA	0.809569	0.714864	0.0947052	0.177156	7.89e-06	1	0.64	0.153544	0.888889	0.533333	0.105483	0	0.0144463	1356304	0	0	20.8571	26.8889	2	10	40	44	5	18	chr1	29809240	31154009	1344770	*	inter:499	NA	NA	NA	hg19_cpg_inter	61926
AR_ctr	CD4 mem	chr1	149978234	149978234	1	6	51	Shelf	NA	NA	NA	NA	0.837147	0.760372	0.0767754	0.137058	7.91e-06	1	0.666667	0.137376	0.88	0.625	0.0836634	0	0.014477	1574337	0	0	14.4286	16.3333	8	8	22	29	5	14	chr1	149949512	149982396	32885	-	intron:52669	uc001etn.3	56957	OTUD7B	hg19_genes_introns	61106
AR_ctr	CD4 mem	chr1	149978234	149978234	1	6	51	Shelf	NA	NA	NA	NA	0.837147	0.760372	0.0767754	0.137058	7.91e-06	1	0.666667	0.137376	0.88	0.625	0.0836634	0	0.014477	1574337	0	0	14.4286	16.3333	8	8	22	29	5	14	chr1	149978154	149980153	2000	*	shelf:2572	NA	NA	NA	hg19_cpg_shelves	61106
AR_ctr	CD4 mem	chr3	194208376	194208376	1	9	57	Island	NA	NA	NA	NA	0.0238095	0.00952381	0.0142857	0.792195	7.94e-06	0.142857	0	0.0583212	0.1	0	0.0281481	0	0.0145188	2637971	1	0	10.4286	12.6667	0	1	21	26	5	14	chr3	194208185	194209455	1271	+	exon:147107	uc021xja.1	401106	LINC00884	hg19_genes_exons	506
AR_ctr	CD4 mem	chr3	194208376	194208376	1	9	57	Island	NA	NA	NA	NA	0.0238095	0.00952381	0.0142857	0.792195	7.94e-06	0.142857	0	0.0583212	0.1	0	0.0281481	0	0.0145188	2637971	1	0	10.4286	12.6667	0	1	21	26	5	14	chr3	194208185	194209455	1271	+	exon:147109	uc003fua.2	401106	LINC00884	hg19_genes_exons	506
AR_ctr	CD4 mem	chr3	194208376	194208376	1	9	57	Island	NA	NA	NA	NA	0.0238095	0.00952381	0.0142857	0.792195	7.94e-06	0.142857	0	0.0583212	0.1	0	0.0281481	0	0.0145188	2637971	1	0	10.4286	12.6667	0	1	21	26	5	14	chr3	194207985	194208384	400	+	intronexonboundary:136208	uc021xja.1	401106	LINC00884	hg19_genes_intronexonboundaries	506
AR_ctr	CD4 mem	chr3	194208376	194208376	1	9	57	Island	NA	NA	NA	NA	0.0238095	0.00952381	0.0142857	0.792195	7.94e-06	0.142857	0	0.0583212	0.1	0	0.0281481	0	0.0145188	2637971	1	0	10.4286	12.6667	0	1	21	26	5	14	chr3	194207985	194208384	400	+	intronexonboundary:136209	uc003fua.2	401106	LINC00884	hg19_genes_intronexonboundaries	506
AR_ctr	CD4 mem	chr3	194208376	194208376	1	9	57	Island	NA	NA	NA	NA	0.0238095	0.00952381	0.0142857	0.792195	7.94e-06	0.142857	0	0.0583212	0.1	0	0.0281481	0	0.0145188	2637971	1	0	10.4286	12.6667	0	1	21	26	5	14	chr3	194207386	194208785	1400	*	island:5244	NA	NA	NA	hg19_cpg_islands	506
AR_ctr	CD4 mem	chr7	5313894	5313894	1	2	62	Open Sea	NA	NA	NA	NA	0.762267	0.535725	0.226543	0.500927	8.01e-06	1	0.461538	0.200512	0.8	0.222222	0.166424	0	0.0146308	674521	0	0	13.8571	19.4444	1	5	22	35	5	16	chr7	5273487	5317560	44074	*	intergenic:6096	NA	NA	NA	hg19_genes_intergenic	8665
AR_ctr	CD4 mem	chr7	5313894	5313894	1	2	62	Open Sea	NA	NA	NA	NA	0.762267	0.535725	0.226543	0.500927	8.01e-06	1	0.461538	0.200512	0.8	0.222222	0.166424	0	0.0146308	674521	0	0	13.8571	19.4444	1	5	22	35	5	16	chr7	5272111	5318680	46570	*	inter:6885	NA	NA	NA	hg19_cpg_inter	8665
AR_ctr	CD4 mem	chr20	23974530	23974530	1	3	60	Open Sea	NA	NA	NA	NA	0.84932	0.790639	0.0586811	0.102044	8.03e-06	1	0.666667	0.13458	0.9375	0.428571	0.121937	0	0.0146608	1839349	0	0	16.4286	28.0556	1	6	32	53	6	16	chr20	23974417	24175402	200986	*	intergenic:14721	NA	NA	NA	hg19_genes_intergenic	4806
AR_ctr	CD4 mem	chr20	23974530	23974530	1	3	60	Open Sea	NA	NA	NA	NA	0.84932	0.790639	0.0586811	0.102044	8.03e-06	1	0.666667	0.13458	0.9375	0.428571	0.121937	0	0.0146608	1839349	0	0	16.4286	28.0556	1	6	32	53	6	16	chr20	23973434	24445844	472411	*	inter:17873	NA	NA	NA	hg19_cpg_inter	4806
AR_ctr	CD4 mem	chr18	21911430	21911430	1	8	65	Open Sea	NA	NA	NA	NA	0.835803	0.758467	0.0773357	0.138338	8.07e-06	1	0.454545	0.193689	0.923077	0.454545	0.116512	0	0.0147186	1566736	0	0	14.1429	13.5556	4	6	23	21	5	16	chr18	21898774	21912905	14132	-	intron:532243	uc002kve.3	114876	OSBPL1A	hg19_genes_introns	9779
AR_ctr	CD4 mem	chr18	21911430	21911430	1	8	65	Open Sea	NA	NA	NA	NA	0.835803	0.758467	0.0773357	0.138338	8.07e-06	1	0.454545	0.193689	0.923077	0.454545	0.116512	0	0.0147186	1566736	0	0	14.1429	13.5556	4	6	23	21	5	16	chr18	21856170	21973275	117106	*	inter:16124	NA	NA	NA	hg19_cpg_inter	9779
AR_ctr	CD4 mem	chr2	172959078	172959078	1	7	63	Shore	NA	NA	NA	NA	0.0682863	0.116122	-0.0478354	-0.687984	8.09e-06	0.140351	0	0.0546698	0.242424	0.0483871	0.0569226	0	0.0147439	1488874	0	0	44.5714	54.8333	1	17	75	105	6	18	chr2	172954402	172964165	9764	*	intergenic:2421	NA	NA	NA	hg19_genes_intergenic	8869
AR_ctr	CD4 mem	chr2	172959078	172959078	1	7	63	Shore	NA	NA	NA	NA	0.0682863	0.116122	-0.0478354	-0.687984	8.09e-06	0.140351	0	0.0546698	0.242424	0.0483871	0.0569226	0	0.0147439	1488874	0	0	44.5714	54.8333	1	17	75	105	6	18	chr2	172957268	172959267	2000	*	shore:6621	NA	NA	NA	hg19_cpg_shores	8869
AR_ctr	CD4 mem	chr14	95512770	95512770	1	5	63	Open Sea	NA	NA	NA	NA	0.778354	0.658925	0.119429	0.236999	8.11e-06	1	0.217391	0.264149	0.928571	0.266667	0.219762	0	0.0147801	1130891	0	1	18.4286	22.4444	3	0	31	49	6	17	chr14	95241500	95552564	311065	*	intergenic:11398	NA	NA	NA	hg19_genes_intergenic	111253
AR_ctr	CD4 mem	chr14	95512770	95512770	1	5	63	Open Sea	NA	NA	NA	NA	0.778354	0.658925	0.119429	0.236999	8.11e-06	1	0.217391	0.264149	0.928571	0.266667	0.219762	0	0.0147801	1130891	0	1	18.4286	22.4444	3	0	31	49	6	17	chr14	95335196	95619080	283885	*	inter:13152	NA	NA	NA	hg19_cpg_inter	111253
AR_ctr	CD4 mem	chr15	90799453	90799453	1	5	55	Open Sea	NA	NA	NA	NA	0.908087	0.812455	0.0956321	0.158694	8.14e-06	1	0.734694	0.100002	0.92	0.678571	0.0652951	0	0.014828	1447697	0	0	24	32.1667	6	5	49	64	5	17	chr15	90799373	90799529	157	+	CDS:402152	uc002bpd.1	440307	TTLL13P	hg19_genes_cds	6688
AR_ctr	CD4 mem	chr15	90799453	90799453	1	5	55	Open Sea	NA	NA	NA	NA	0.908087	0.812455	0.0956321	0.158694	8.14e-06	1	0.734694	0.100002	0.92	0.678571	0.0652951	0	0.014828	1447697	0	0	24	32.1667	6	5	49	64	5	17	chr15	90799373	90799529	157	+	exon:505851	uc002bpd.1	440307	TTLL13P	hg19_genes_exons	6688
AR_ctr	CD4 mem	chr15	90799453	90799453	1	5	55	Open Sea	NA	NA	NA	NA	0.908087	0.812455	0.0956321	0.158694	8.14e-06	1	0.734694	0.100002	0.92	0.678571	0.0652951	0	0.014828	1447697	0	0	24	32.1667	6	5	49	64	5	17	chr15	90796600	90800369	3770	+	intron:450707	uc002bpe.1	440307	TTLL13P	hg19_genes_introns	6688
AR_ctr	CD4 mem	chr15	90799453	90799453	1	5	55	Open Sea	NA	NA	NA	NA	0.908087	0.812455	0.0956321	0.158694	8.14e-06	1	0.734694	0.100002	0.92	0.678571	0.0652951	0	0.014828	1447697	0	0	24	32.1667	6	5	49	64	5	17	chr15	90776936	90808888	31953	-	intron:463016	uc031qtr.1	10519	CIB1	hg19_genes_introns	6688
AR_ctr	CD4 mem	chr15	90799453	90799453	1	5	55	Open Sea	NA	NA	NA	NA	0.908087	0.812455	0.0956321	0.158694	8.14e-06	1	0.734694	0.100002	0.92	0.678571	0.0652951	0	0.014828	1447697	0	0	24	32.1667	6	5	49	64	5	17	chr15	90799173	90799572	400	+	intronexonboundary:470828	uc002bpd.1	440307	TTLL13P	hg19_genes_intronexonboundaries	6688
AR_ctr	CD4 mem	chr15	90799453	90799453	1	5	55	Open Sea	NA	NA	NA	NA	0.908087	0.812455	0.0956321	0.158694	8.14e-06	1	0.734694	0.100002	0.92	0.678571	0.0652951	0	0.014828	1447697	0	0	24	32.1667	6	5	49	64	5	17	chr15	90799329	90799728	400	+	exonintronboundary:475206	uc002bpd.1	440307	TTLL13P	hg19_genes_exonintronboundaries	6688
AR_ctr	CD4 mem	chr15	90799453	90799453	1	5	55	Open Sea	NA	NA	NA	NA	0.908087	0.812455	0.0956321	0.158694	8.14e-06	1	0.734694	0.100002	0.92	0.678571	0.0652951	0	0.014828	1447697	0	0	24	32.1667	6	5	49	64	5	17	chr15	90796930	90804574	7645	*	inter:13902	NA	NA	NA	hg19_cpg_inter	6688
AR_ctr	CD4 mem	chr11	64334773	64334773	1	5	67	Open Sea	NA	NA	NA	NA	0.94167	0.825599	0.11607	0.18765	8.16e-06	1	0.833333	0.0631362	1	0.526316	0.122902	0	0.0148451	1310888	0	0	20.7143	29.2222	7	10	34	54	5	18	chr11	64332810	64335070	2261	+	intron:345416	uc001oai.3	55867	SLC22A11	hg19_genes_introns	5296
AR_ctr	CD4 mem	chr11	64334773	64334773	1	5	67	Open Sea	NA	NA	NA	NA	0.94167	0.825599	0.11607	0.18765	8.16e-06	1	0.833333	0.0631362	1	0.526316	0.122902	0	0.0148451	1310888	0	0	20.7143	29.2222	7	10	34	54	5	18	chr11	64332810	64337123	4314	+	intron:345425	uc009ypq.3	55867	SLC22A11	hg19_genes_introns	5296
AR_ctr	CD4 mem	chr11	64334773	64334773	1	5	67	Open Sea	NA	NA	NA	NA	0.94167	0.825599	0.11607	0.18765	8.16e-06	1	0.833333	0.0631362	1	0.526316	0.122902	0	0.0148451	1310888	0	0	20.7143	29.2222	7	10	34	54	5	18	chr11	64333490	64335489	2000	*	shore:26474	NA	NA	NA	hg19_cpg_shores	5296
AR_ctr	CD4 mem	chr21	11096613	11096613	1	1	56	Open Sea	NA	NA	NA	NA	0.812916	0.694845	0.118071	0.223439	8.24e-06	1	0.5	0.19928	0.818182	0.477612	0.105867	0	0.0149685	1174130	0	0	22.2857	42.5	8	21	72	67	5	18	chr21	11058324	11097545	39222	-	intron:587181	uc002yit.1	85318	BAGE3	hg19_genes_introns	891950
AR_ctr	CD4 mem	chr21	11096613	11096613	1	1	56	Open Sea	NA	NA	NA	NA	0.812916	0.694845	0.118071	0.223439	8.24e-06	1	0.5	0.19928	0.818182	0.477612	0.105867	0	0.0149685	1174130	0	0	22.2857	42.5	8	21	72	67	5	18	chr21	11058324	11097545	39222	-	intron:587189	uc002yiu.1	85318	BAGE3	hg19_genes_introns	891950
AR_ctr	CD4 mem	chr21	11096613	11096613	1	1	56	Open Sea	NA	NA	NA	NA	0.812916	0.694845	0.118071	0.223439	8.24e-06	1	0.5	0.19928	0.818182	0.477612	0.105867	0	0.0149685	1174130	0	0	22.2857	42.5	8	21	72	67	5	18	chr21	11059817	11097545	37729	-	intron:587192	uc002yiv.1	574	BAGE	hg19_genes_introns	891950
AR_ctr	CD4 mem	chr21	11096613	11096613	1	1	56	Open Sea	NA	NA	NA	NA	0.812916	0.694845	0.118071	0.223439	8.24e-06	1	0.5	0.19928	0.818182	0.477612	0.105867	0	0.0149685	1174130	0	0	22.2857	42.5	8	21	72	67	5	18	chr21	11059817	11097545	37729	-	intron:587195	uc002yix.2	85318	BAGE3	hg19_genes_introns	891950
AR_ctr	CD4 mem	chr21	11096613	11096613	1	1	56	Open Sea	NA	NA	NA	NA	0.812916	0.694845	0.118071	0.223439	8.24e-06	1	0.5	0.19928	0.818182	0.477612	0.105867	0	0.0149685	1174130	0	0	22.2857	42.5	8	21	72	67	5	18	chr21	10995414	11102718	107305	*	inter:18287	NA	NA	NA	hg19_cpg_inter	891950
AR_ctr	CD4 mem	chr9	137730894	137730894	1	5	61	Island	NA	NA	NA	NA	0.866327	0.833771	0.0325561	0.054618	8.26e-06	1	0.615385	0.140306	1	0.652174	0.0996931	0	0.014988	2374795	0	0	13.2857	18.9444	3	8	26	29	5	17	chr9	137727051	137734002	6952	+	intron:293374	uc004cfe.4	1289	COL5A1	hg19_genes_introns	41762
AR_ctr	CD4 mem	chr9	137730894	137730894	1	5	61	Island	NA	NA	NA	NA	0.866327	0.833771	0.0325561	0.054618	8.26e-06	1	0.615385	0.140306	1	0.652174	0.0996931	0	0.014988	2374795	0	0	13.2857	18.9444	3	8	26	29	5	17	chr9	137727051	137734002	6952	+	intron:293439	uc031tfl.1	1289	COL5A1	hg19_genes_introns	41762
AR_ctr	CD4 mem	chr9	137730894	137730894	1	5	61	Island	NA	NA	NA	NA	0.866327	0.833771	0.0325561	0.054618	8.26e-06	1	0.615385	0.140306	1	0.652174	0.0996931	0	0.014988	2374795	0	0	13.2857	18.9444	3	8	26	29	5	17	chr9	137712056	137764394	52339	-	intron:306587	uc004cff.3	101448202	LOC101448202	hg19_genes_introns	41762
AR_ctr	CD4 mem	chr9	137730894	137730894	1	5	61	Island	NA	NA	NA	NA	0.866327	0.833771	0.0325561	0.054618	8.26e-06	1	0.615385	0.140306	1	0.652174	0.0996931	0	0.014988	2374795	0	0	13.2857	18.9444	3	8	26	29	5	17	chr9	137730887	137731202	316	*	island:12431	NA	NA	NA	hg19_cpg_islands	41762
AR_ctr	CD4 mem	chr14	76966501	76966501	1	2	63	Open Sea	NA	NA	NA	NA	0.661305	0.511257	0.150047	0.364971	8.34e-06	1	0.352941	0.281571	0.909091	0.125	0.218461	0	0.0151067	845085	0	0	15.8571	23	3	9	28	39	6	17	chr14	76966410	76967037	628	+	intron:423820	uc001xso.3	2103	ESRRB	hg19_genes_introns	92614
AR_ctr	CD4 mem	chr14	76966501	76966501	1	2	63	Open Sea	NA	NA	NA	NA	0.661305	0.511257	0.150047	0.364971	8.34e-06	1	0.352941	0.281571	0.909091	0.125	0.218461	0	0.0151067	845085	0	0	15.8571	23	3	9	28	39	6	17	chr14	76966410	76967037	628	+	intron:423830	uc001xsr.3	2103	ESRRB	hg19_genes_introns	92614
AR_ctr	CD4 mem	chr14	76966501	76966501	1	2	63	Open Sea	NA	NA	NA	NA	0.661305	0.511257	0.150047	0.364971	8.34e-06	1	0.352941	0.281571	0.909091	0.125	0.218461	0	0.0151067	845085	0	0	15.8571	23	3	9	28	39	6	17	chr14	76966209	76966608	400	+	exonintronboundary:446433	uc001xso.3	2103	ESRRB	hg19_genes_exonintronboundaries	92614
AR_ctr	CD4 mem	chr14	76966501	76966501	1	2	63	Open Sea	NA	NA	NA	NA	0.661305	0.511257	0.150047	0.364971	8.34e-06	1	0.352941	0.281571	0.909091	0.125	0.218461	0	0.0151067	845085	0	0	15.8571	23	3	9	28	39	6	17	chr14	76966209	76966608	400	+	exonintronboundary:446434	uc001xsr.3	2103	ESRRB	hg19_genes_exonintronboundaries	92614
AR_ctr	CD4 mem	chr14	76966501	76966501	1	2	63	Open Sea	NA	NA	NA	NA	0.661305	0.511257	0.150047	0.364971	8.34e-06	1	0.352941	0.281571	0.909091	0.125	0.218461	0	0.0151067	845085	0	0	15.8571	23	3	9	28	39	6	17	chr14	76962075	77223569	261495	*	inter:13064	NA	NA	NA	hg19_cpg_inter	92614
AR_ctr	CD4 mem	chr3	193831700	193831700	1	2	48	Open Sea	NA	NA	NA	NA	0.836944	0.840354	-0.00340951	-0.00579614	8.45e-06	1	0.615385	0.160971	0.971429	0.714286	0.0671701	0	0.015248	3309024	0	0	17.4286	28.8889	4	14	26	45	6	18	chr3	193792319	193848930	56612	*	intergenic:3605	NA	NA	NA	hg19_genes_intergenic	22229
AR_ctr	CD4 mem	chr3	193831700	193831700	1	2	48	Open Sea	NA	NA	NA	NA	0.836944	0.840354	-0.00340951	-0.00579614	8.45e-06	1	0.615385	0.160971	0.971429	0.714286	0.0671701	0	0.015248	3309024	0	0	17.4286	28.8889	4	14	26	45	6	18	chr3	193793267	193847699	54433	*	inter:4099	NA	NA	NA	hg19_cpg_inter	22229
AR_ctr	CD4 mem	chr11	1990691	1990691	1	5	73	Open Sea	NA	NA	NA	NA	0.14072	0.250491	-0.10977	-0.789358	8.48e-06	0.375	0	0.138706	0.619048	0.0769231	0.123526	0	0.0153003	600213	0	0	21.1429	23.2222	1	3	39	44	5	16	chr11	1989989	1993988	4000	+	1to5kb:41006	uc001luy.2	NA	NA	hg19_genes_1to5kb	4296
AR_ctr	CD4 mem	chr11	1990691	1990691	1	5	73	Open Sea	NA	NA	NA	NA	0.14072	0.250491	-0.10977	-0.789358	8.48e-06	0.375	0	0.138706	0.619048	0.0769231	0.123526	0	0.0153003	600213	0	0	21.1429	23.2222	1	3	39	44	5	16	chr11	1988900	1990899	2000	*	shore:25512	NA	NA	NA	hg19_cpg_shores	4296
AR_ctr	CD4 mem	chr11	120403050	120403050	1	5	69	Open Sea	NA	NA	NA	NA	0.83833	0.740213	0.0981167	0.177325	8.51e-06	1	0.6875	0.120335	0.9	0.585366	0.0857104	0	0.0153238	1355481	0	0	21.5714	25.6667	6	6	31	43	6	17	chr11	120382597	120524393	141797	+	intron:353072	uc001pxn.2	2900	GRIK4	hg19_genes_introns	20581
AR_ctr	CD4 mem	chr11	120403050	120403050	1	5	69	Open Sea	NA	NA	NA	NA	0.83833	0.740213	0.0981167	0.177325	8.51e-06	1	0.6875	0.120335	0.9	0.585366	0.0857104	0	0.0153238	1355481	0	0	21.5714	25.6667	6	6	31	43	6	17	chr11	120386936	120430822	43887	*	inter:11281	NA	NA	NA	hg19_cpg_inter	20581
AR_ctr	CD4 mem	chr17	79056855	79056855	1	3	61	Open Sea	NA	NA	NA	NA	0.854746	0.713436	0.14131	0.25741	8.53e-06	1	0.7	0.117457	0.928571	0.285714	0.177433	0	0.0153566	1072588	0	0	21.8571	17.5556	2	5	49	33	6	16	chr17	79056543	79056873	331	*	enhancer:26377	NA	NA	NA	hg19_enhancers_fantom	2038
AR_ctr	CD4 mem	chr17	79056855	79056855	1	3	61	Open Sea	NA	NA	NA	NA	0.854746	0.713436	0.14131	0.25741	8.53e-06	1	0.7	0.117457	0.928571	0.285714	0.177433	0	0.0153566	1072588	0	0	21.8571	17.5556	2	5	49	33	6	16	chr17	79053895	79057894	4000	+	1to5kb:62190	uc002jzh.2	10458	BAIAP2	hg19_genes_1to5kb	2038
AR_ctr	CD4 mem	chr17	79056855	79056855	1	3	61	Open Sea	NA	NA	NA	NA	0.854746	0.713436	0.14131	0.25741	8.53e-06	1	0.7	0.117457	0.928571	0.285714	0.177433	0	0.0153566	1072588	0	0	21.8571	17.5556	2	5	49	33	6	16	chr17	79031768	79058631	26864	+	intron:506041	uc002jyz.4	10458	BAIAP2	hg19_genes_introns	2038
AR_ctr	CD4 mem	chr17	79056855	79056855	1	3	61	Open Sea	NA	NA	NA	NA	0.854746	0.713436	0.14131	0.25741	8.53e-06	1	0.7	0.117457	0.928571	0.285714	0.177433	0	0.0153566	1072588	0	0	21.8571	17.5556	2	5	49	33	6	16	chr17	79031768	79058631	26864	+	intron:506053	uc002jza.2	10458	BAIAP2	hg19_genes_introns	2038
AR_ctr	CD4 mem	chr17	79056855	79056855	1	3	61	Open Sea	NA	NA	NA	NA	0.854746	0.713436	0.14131	0.25741	8.53e-06	1	0.7	0.117457	0.928571	0.285714	0.177433	0	0.0153566	1072588	0	0	21.8571	17.5556	2	5	49	33	6	16	chr17	79031768	79058631	26864	+	intron:506067	uc002jzb.2	10458	BAIAP2	hg19_genes_introns	2038
AR_ctr	CD4 mem	chr17	79056855	79056855	1	3	61	Open Sea	NA	NA	NA	NA	0.854746	0.713436	0.14131	0.25741	8.53e-06	1	0.7	0.117457	0.928571	0.285714	0.177433	0	0.0153566	1072588	0	0	21.8571	17.5556	2	5	49	33	6	16	chr17	79031768	79058631	26864	+	intron:506080	uc002jzc.2	10458	BAIAP2	hg19_genes_introns	2038
AR_ctr	CD4 mem	chr17	79056855	79056855	1	3	61	Open Sea	NA	NA	NA	NA	0.854746	0.713436	0.14131	0.25741	8.53e-06	1	0.7	0.117457	0.928571	0.285714	0.177433	0	0.0153566	1072588	0	0	21.8571	17.5556	2	5	49	33	6	16	chr17	79031768	79058631	26864	+	intron:506093	uc002jzd.2	10458	BAIAP2	hg19_genes_introns	2038
AR_ctr	CD4 mem	chr17	79056855	79056855	1	3	61	Open Sea	NA	NA	NA	NA	0.854746	0.713436	0.14131	0.25741	8.53e-06	1	0.7	0.117457	0.928571	0.285714	0.177433	0	0.0153566	1072588	0	0	21.8571	17.5556	2	5	49	33	6	16	chr17	79031768	79058631	26864	+	intron:506108	uc002jze.2	10458	BAIAP2	hg19_genes_introns	2038
AR_ctr	CD4 mem	chr17	79056855	79056855	1	3	61	Open Sea	NA	NA	NA	NA	0.854746	0.713436	0.14131	0.25741	8.53e-06	1	0.7	0.117457	0.928571	0.285714	0.177433	0	0.0153566	1072588	0	0	21.8571	17.5556	2	5	49	33	6	16	chr17	79031768	79058631	26864	+	intron:506122	uc002jzf.2	10458	BAIAP2	hg19_genes_introns	2038
AR_ctr	CD4 mem	chr17	79056855	79056855	1	3	61	Open Sea	NA	NA	NA	NA	0.854746	0.713436	0.14131	0.25741	8.53e-06	1	0.7	0.117457	0.928571	0.285714	0.177433	0	0.0153566	1072588	0	0	21.8571	17.5556	2	5	49	33	6	16	chr17	79031768	79058631	26864	+	intron:506135	uc002jzg.2	10458	BAIAP2	hg19_genes_introns	2038
AR_ctr	CD4 mem	chr17	79056855	79056855	1	3	61	Open Sea	NA	NA	NA	NA	0.854746	0.713436	0.14131	0.25741	8.53e-06	1	0.7	0.117457	0.928571	0.285714	0.177433	0	0.0153566	1072588	0	0	21.8571	17.5556	2	5	49	33	6	16	chr17	79009109	79058631	49523	+	intron:506147	uc010wuh.1	10458	BAIAP2	hg19_genes_introns	2038
AR_ctr	CD4 mem	chr17	79056855	79056855	1	3	61	Open Sea	NA	NA	NA	NA	0.854746	0.713436	0.14131	0.25741	8.53e-06	1	0.7	0.117457	0.928571	0.285714	0.177433	0	0.0153566	1072588	0	0	21.8571	17.5556	2	5	49	33	6	16	chr17	79056535	79073317	16783	*	inter:15913	NA	NA	NA	hg19_cpg_inter	2038
AR_ctr	CD4 mem	chr2	28574500	28574500	1	5	55	Open Sea	NA	NA	NA	NA	0.617351	0.481357	0.135995	0.352504	8.58e-06	1	0.1875	0.332022	0.8	0.25	0.174412	0	0.0154126	866190	0	0	11.7143	17	2	5	19	32	5	16	chr2	28561768	28607275	45508	*	intergenic:1770	NA	NA	NA	hg19_genes_intergenic	41167
AR_ctr	CD4 mem	chr2	28574500	28574500	1	5	55	Open Sea	NA	NA	NA	NA	0.617351	0.481357	0.135995	0.352504	8.58e-06	1	0.1875	0.332022	0.8	0.25	0.174412	0	0.0154126	866190	0	0	11.7143	17	2	5	19	32	5	16	chr2	28117765	28608964	491200	*	inter:2072	NA	NA	NA	hg19_cpg_inter	41167
AR_ctr	CD4 mem	chr19	48457694	48457694	1	3	52	Open Sea	NA	NA	NA	NA	0.918989	0.896994	0.0219954	0.0345691	8.69e-06	1	0.808824	0.0713068	0.982759	0.802469	0.0461137	0	0.0155876	2704349	0	0	77.1429	101.056	20	16	136	184	7	18	chr19	48453939	48457938	4000	+	1to5kb:67414	uc010xzc.1	100170218	SNAR-C2	hg19_genes_1to5kb	1243
AR_ctr	CD4 mem	chr19	48457694	48457694	1	3	52	Open Sea	NA	NA	NA	NA	0.918989	0.896994	0.0219954	0.0345691	8.69e-06	1	0.808824	0.0713068	0.982759	0.802469	0.0461137	0	0.0155876	2704349	0	0	77.1429	101.056	20	16	136	184	7	18	chr19	48368161	48561069	192909	*	inter:17422	NA	NA	NA	hg19_cpg_inter	1243
AR_ctr	CD4 mem	chr11	42085808	42085808	1	1	38	Open Sea	NA	NA	NA	NA	0.963672	0.938676	0.0249961	0.0375206	8.7e-06	1	0.931818	0.0282277	1	0.895522	0.0275296	0	0.0156029	2651762	0	0	87.8571	101.278	56	45	137	154	7	18	chr11	41486187	42209292	723106	*	intergenic:9122	NA	NA	NA	hg19_genes_intergenic	1247695
AR_ctr	CD4 mem	chr11	42085808	42085808	1	1	38	Open Sea	NA	NA	NA	NA	0.963672	0.938676	0.0249961	0.0375206	8.7e-06	1	0.931818	0.0282277	1	0.895522	0.0275296	0	0.0156029	2651762	0	0	87.8571	101.278	56	45	137	154	7	18	chr11	36535916	43329439	6793524	*	inter:10657	NA	NA	NA	hg19_cpg_inter	1247695
AR_ctr	CD4 mem	chr19	17621992	17621992	1	7	56	Open Sea	NA	NA	NA	NA	0.927694	0.903298	0.0243963	0.0380319	8.72e-06	1	0.763158	0.0837939	0.967742	0.8	0.0556107	0	0.0156207	2642529	0	0	22	26.1111	12	10	38	38	7	18	chr19	17621432	17622431	1000	+	promoter:66533	uc002ngw.3	25796	PGLS	hg19_genes_promoters	438
AR_ctr	CD4 mem	chr19	17621992	17621992	1	7	56	Open Sea	NA	NA	NA	NA	0.927694	0.903298	0.0243963	0.0380319	8.72e-06	1	0.763158	0.0837939	0.967742	0.8	0.0556107	0	0.0156207	2642529	0	0	22	26.1111	12	10	38	38	7	18	chr19	17620318	17622317	2000	*	shore:42405	NA	NA	NA	hg19_cpg_shores	438
AR_ctr	CD4 mem	chr4	1022336	1022336	1	8	75	Island	NA	NA	NA	NA	0.878407	0.794376	0.0840311	0.143351	8.77e-06	1	0.761905	0.093378	0.933333	0.714286	0.063073	0	0.0156809	1536938	0	0	17.4286	22.8333	1	9	32	53	6	17	chr4	1020687	1050036	29350	*	intergenic:3660	NA	NA	NA	hg19_genes_intergenic	16401
AR_ctr	CD4 mem	chr4	1022336	1022336	1	8	75	Island	NA	NA	NA	NA	0.878407	0.794376	0.0840311	0.143351	8.77e-06	1	0.761905	0.093378	0.933333	0.714286	0.063073	0	0.0156809	1536938	0	0	17.4286	22.8333	1	9	32	53	6	17	chr4	1022287	1022667	381	*	island:5391	NA	NA	NA	hg19_cpg_islands	16401
AR_ctr	CD4 mem	chr21	43866959	43866959	1	4	60	Open Sea	NA	NA	NA	NA	0.922678	0.888423	0.034255	0.0539842	8.79e-06	1	0.787879	0.0801388	0.972973	0.773333	0.0655821	0	0.015707	2383587	0	0	54.7143	50.6111	37	21	84	83	7	18	chr21	43864754	43867166	2413	+	intron:585191	uc002zbe.3	53347	UBASH3A	hg19_genes_introns	42987
AR_ctr	CD4 mem	chr21	43866959	43866959	1	4	60	Open Sea	NA	NA	NA	NA	0.922678	0.888423	0.034255	0.0539842	8.79e-06	1	0.787879	0.0801388	0.972973	0.773333	0.0655821	0	0.015707	2383587	0	0	54.7143	50.6111	37	21	84	83	7	18	chr21	43864754	43867166	2413	+	intron:585204	uc002zbf.3	53347	UBASH3A	hg19_genes_introns	42987
AR_ctr	CD4 mem	chr21	43866959	43866959	1	4	60	Open Sea	NA	NA	NA	NA	0.922678	0.888423	0.034255	0.0539842	8.79e-06	1	0.787879	0.0801388	0.972973	0.773333	0.0655821	0	0.015707	2383587	0	0	54.7143	50.6111	37	21	84	83	7	18	chr21	43864754	43867166	2413	+	intron:585217	uc010gpc.3	53347	UBASH3A	hg19_genes_introns	42987
AR_ctr	CD4 mem	chr21	43866959	43866959	1	4	60	Open Sea	NA	NA	NA	NA	0.922678	0.888423	0.034255	0.0539842	8.79e-06	1	0.787879	0.0801388	0.972973	0.773333	0.0655821	0	0.015707	2383587	0	0	54.7143	50.6111	37	21	84	83	7	18	chr21	43864754	43867166	2413	+	intron:585230	uc010gpd.3	53347	UBASH3A	hg19_genes_introns	42987
AR_ctr	CD4 mem	chr21	43866959	43866959	1	4	60	Open Sea	NA	NA	NA	NA	0.922678	0.888423	0.034255	0.0539842	8.79e-06	1	0.787879	0.0801388	0.972973	0.773333	0.0655821	0	0.015707	2383587	0	0	54.7143	50.6111	37	21	84	83	7	18	chr21	43862707	43867166	4460	+	intron:585241	uc010gpe.3	53347	UBASH3A	hg19_genes_introns	42987
AR_ctr	CD4 mem	chr21	43866959	43866959	1	4	60	Open Sea	NA	NA	NA	NA	0.922678	0.888423	0.034255	0.0539842	8.79e-06	1	0.787879	0.0801388	0.972973	0.773333	0.0655821	0	0.015707	2383587	0	0	54.7143	50.6111	37	21	84	83	7	18	chr21	43730317	43912278	181962	*	inter:18418	NA	NA	NA	hg19_cpg_inter	42987
AR_ctr	CD4 mem	chr18	47026395	47026395	1	2	57	Open Sea	NA	NA	NA	NA	0.881152	0.792344	0.0888086	0.151452	8.86e-06	1	0.761905	0.0952396	0.956522	0.526316	0.118834	0	0.0158199	1485594	0	0	16	21.0556	4	12	21	35	6	18	chr18	47023936	47083426	59491	*	intergenic:13557	NA	NA	NA	hg19_genes_intergenic	12651
AR_ctr	CD4 mem	chr18	47026395	47026395	1	2	57	Open Sea	NA	NA	NA	NA	0.881152	0.792344	0.0888086	0.151452	8.86e-06	1	0.761905	0.0952396	0.956522	0.526316	0.118834	0	0.0158199	1485594	0	0	16	21.0556	4	12	21	35	6	18	chr18	47022949	47083075	60127	*	inter:16213	NA	NA	NA	hg19_cpg_inter	12651
AR_ctr	CD4 mem	chr2	496255	496255	1	7	65	Open Sea	NA	NA	NA	NA	0.82748	0.777269	0.0502116	0.0891991	8.87e-06	1	0.71875	0.121731	0.954545	0.5625	0.125262	0	0.0158278	1959703	0	0	21.4286	24.8889	5	10	36	45	6	18	chr2	293309	667972	374664	*	intergenic:1650	NA	NA	NA	hg19_genes_intergenic	231385
AR_ctr	CD4 mem	chr2	496255	496255	1	7	65	Open Sea	NA	NA	NA	NA	0.82748	0.777269	0.0502116	0.0891991	8.87e-06	1	0.71875	0.121731	0.954545	0.5625	0.125262	0	0.0158278	1959703	0	0	21.4286	24.8889	5	10	36	45	6	18	chr2	495835	496823	989	*	shore:4571	NA	NA	NA	hg19_cpg_shores	231385
AR_ctr	CD4 mem	chr5	170914930	170914930	1	5	63	Open Sea	NA	NA	NA	NA	0.880952	0.739886	0.141066	0.248676	8.87e-06	1	0.583333	0.164112	0.9	0	0.208982	0	0.0158278	1096090	0	0	14.1429	12.6111	10	4	18	20	7	13	chr5	170884631	171288555	403925	*	intergenic:5029	NA	NA	NA	hg19_genes_intergenic	68262
AR_ctr	CD4 mem	chr5	170914930	170914930	1	5	63	Open Sea	NA	NA	NA	NA	0.880952	0.739886	0.141066	0.248676	8.87e-06	1	0.583333	0.164112	0.9	0	0.208982	0	0.0158278	1096090	0	0	14.1429	12.6111	10	4	18	20	7	13	chr5	170887837	171053071	165235	*	inter:5625	NA	NA	NA	hg19_cpg_inter	68262
AR_ctr	CD4 mem	chr22	43693931	43693931	1	2	59	Open Sea	NA	NA	NA	NA	0.914244	0.844371	0.0698735	0.113412	8.9e-06	1	0.833333	0.0679475	0.974359	0.6	0.101437	0	0.0158698	1745680	0	0	28	35.5556	14	5	43	70	7	17	chr22	43687187	43715942	28756	-	intron:603327	uc003bdt.2	80274	SCUBE1	hg19_genes_introns	21969
AR_ctr	CD4 mem	chr22	43693931	43693931	1	2	59	Open Sea	NA	NA	NA	NA	0.914244	0.844371	0.0698735	0.113412	8.9e-06	1	0.833333	0.0679475	0.974359	0.6	0.101437	0	0.0158698	1745680	0	0	28	35.5556	14	5	43	70	7	17	chr22	43687187	43715942	28756	-	intron:603334	uc003bdu.2	80274	SCUBE1	hg19_genes_introns	21969
AR_ctr	CD4 mem	chr22	43693931	43693931	1	2	59	Open Sea	NA	NA	NA	NA	0.914244	0.844371	0.0698735	0.113412	8.9e-06	1	0.833333	0.0679475	0.974359	0.6	0.101437	0	0.0158698	1745680	0	0	28	35.5556	14	5	43	70	7	17	chr22	43627668	43734882	107215	*	inter:18943	NA	NA	NA	hg19_cpg_inter	21969
AR_ctr	CD4 mem	chr11	3248514	3248514	1	5	57	Open Sea	NA	NA	NA	NA	0.855348	0.79568	0.0596682	0.103074	8.95e-06	1	0.68	0.121743	0.928571	0.391304	0.129588	0	0.0159414	1830624	0	0	20.7143	21.8333	4	9	29	40	6	17	chr11	3245044	3249040	3997	*	intergenic:8917	NA	NA	NA	hg19_genes_intergenic	8951
AR_ctr	CD4 mem	chr11	3248514	3248514	1	5	57	Open Sea	NA	NA	NA	NA	0.855348	0.79568	0.0596682	0.103074	8.95e-06	1	0.68	0.121743	0.928571	0.391304	0.129588	0	0.0159414	1830624	0	0	20.7143	21.8333	4	9	29	40	6	17	chr11	3243989	3249768	5780	*	inter:10475	NA	NA	NA	hg19_cpg_inter	8951
AR_ctr	CD4 mem	chr14	65008213	65008213	1	8	61	Island	NA	NA	NA	NA	0.167929	0.280947	-0.113018	-0.709456	9.02e-06	0.615385	0	0.209331	0.642857	0.0555556	0.166993	0	0.0160464	572545	0	0	14.7143	20.2222	1	6	35	47	5	17	chr14	65007568	65009487	1920	+	CDS:381287	uc001xhj.3	NA	NA	hg19_genes_cds	1026
AR_ctr	CD4 mem	chr14	65008213	65008213	1	8	61	Island	NA	NA	NA	NA	0.167929	0.280947	-0.113018	-0.709456	9.02e-06	0.615385	0	0.209331	0.642857	0.0555556	0.166993	0	0.0160464	572545	0	0	14.7143	20.2222	1	6	35	47	5	17	chr14	65007568	65009487	1920	+	CDS:381288	uc001xhk.4	3306	HSPA2	hg19_genes_cds	1026
AR_ctr	CD4 mem	chr14	65008213	65008213	1	8	61	Island	NA	NA	NA	NA	0.167929	0.280947	-0.113018	-0.709456	9.02e-06	0.615385	0	0.209331	0.642857	0.0555556	0.166993	0	0.0160464	572545	0	0	14.7143	20.2222	1	6	35	47	5	17	chr14	65007563	65009954	2392	+	exon:473070	uc001xhj.3	NA	NA	hg19_genes_exons	1026
AR_ctr	CD4 mem	chr14	65008213	65008213	1	8	61	Island	NA	NA	NA	NA	0.167929	0.280947	-0.113018	-0.709456	9.02e-06	0.615385	0	0.209331	0.642857	0.0555556	0.166993	0	0.0160464	572545	0	0	14.7143	20.2222	1	6	35	47	5	17	chr14	65007186	65009954	2769	+	exon:473071	uc001xhk.4	3306	HSPA2	hg19_genes_exons	1026
AR_ctr	CD4 mem	chr14	65008213	65008213	1	8	61	Island	NA	NA	NA	NA	0.167929	0.280947	-0.113018	-0.709456	9.02e-06	0.615385	0	0.209331	0.642857	0.0555556	0.166993	0	0.0160464	572545	0	0	14.7143	20.2222	1	6	35	47	5	17	chr14	65007186	65009954	2769	+	firstexon:51489	uc001xhk.4	3306	HSPA2	hg19_genes_firstexons	1026
AR_ctr	CD4 mem	chr14	65008213	65008213	1	8	61	Island	NA	NA	NA	NA	0.167929	0.280947	-0.113018	-0.709456	9.02e-06	0.615385	0	0.209331	0.642857	0.0555556	0.166993	0	0.0160464	572545	0	0	14.7143	20.2222	1	6	35	47	5	17	chr14	65006875	65009197	2323	*	island:17317	NA	NA	NA	hg19_cpg_islands	1026
AR_ctr	CD4 mem	chr1	187673935	187673935	1	5	54	Open Sea	NA	NA	NA	NA	0.846156	0.754703	0.0914526	0.162973	9.04e-06	1	0.758621	0.10825	0.885714	0.6	0.0917315	0	0.0160787	1425664	0	0	19.1429	21	1	10	29	38	6	18	chr1	187612989	190066796	2453808	*	intergenic:1277	NA	NA	NA	hg19_genes_intergenic	63576
AR_ctr	CD4 mem	chr1	187673935	187673935	1	5	54	Open Sea	NA	NA	NA	NA	0.846156	0.754703	0.0914526	0.162973	9.04e-06	1	0.758621	0.10825	0.885714	0.6	0.0917315	0	0.0160787	1425664	0	0	19.1429	21	1	10	29	38	6	18	chr1	186654082	192773632	6119551	*	inter:1495	NA	NA	NA	hg19_cpg_inter	63576
AR_ctr	CD4 mem	chr6	153755522	153755522	1	4	60	Open Sea	NA	NA	NA	NA	0.885221	0.829425	0.0557959	0.0928423	9.05e-06	1	0.736842	0.103978	1	0.4	0.128977	0	0.0160841	1923011	0	0	13.4286	14.7778	3	5	21	25	5	15	chr6	153457390	154326630	869241	*	intergenic:5987	NA	NA	NA	hg19_genes_intergenic	576107
AR_ctr	CD4 mem	chr6	153755522	153755522	1	4	60	Open Sea	NA	NA	NA	NA	0.885221	0.829425	0.0557959	0.0928423	9.05e-06	1	0.736842	0.103978	1	0.4	0.128977	0	0.0160841	1923011	0	0	13.4286	14.7778	3	5	21	25	5	15	chr6	153456793	154356586	899794	*	inter:6592	NA	NA	NA	hg19_cpg_inter	576107
AR_ctr	CD4 mem	chr10	128615539	128615539	1	2	49	Open Sea	NA	NA	NA	NA	0.951975	0.897695	0.0542804	0.0837925	9.05e-06	1	0.907407	0.0365892	0.971154	0.772727	0.0549992	0	0.0160841	2013836	0	0	56.2857	66.0556	4	5	101	148	6	17	chr10	128594133	128768965	174833	+	intron:321043	uc001ljt.3	1793	DOCK1	hg19_genes_introns	6162
AR_ctr	CD4 mem	chr10	128615539	128615539	1	2	49	Open Sea	NA	NA	NA	NA	0.951975	0.897695	0.0542804	0.0837925	9.05e-06	1	0.907407	0.0365892	0.971154	0.772727	0.0549992	0	0.0160841	2013836	0	0	56.2857	66.0556	4	5	101	148	6	17	chr10	128594133	128768965	174833	+	intron:321094	uc010qun.2	1793	DOCK1	hg19_genes_introns	6162
AR_ctr	CD4 mem	chr10	128615539	128615539	1	2	49	Open Sea	NA	NA	NA	NA	0.951975	0.897695	0.0542804	0.0837925	9.05e-06	1	0.907407	0.0365892	0.971154	0.772727	0.0549992	0	0.0160841	2013836	0	0	56.2857	66.0556	4	5	101	148	6	17	chr10	128599049	128969590	370542	*	inter:10283	NA	NA	NA	hg19_cpg_inter	6162
AR_ctr	CD4 mem	chr9	90114032	90114032	1	6	52	Open Sea	NA	NA	NA	NA	0.188026	0.202713	-0.0146871	-0.103219	9.07e-06	0.538462	0	0.194639	0.333333	0.128205	0.0666876	0	0.0160953	2619428	0	0	15.4286	26.3333	2	3	26	48	6	17	chr9	90113993	90114054	62	+	CDS:258234	uc004apc.3	1612	DAPK1	hg19_genes_cds	146
AR_ctr	CD4 mem	chr9	90114032	90114032	1	6	52	Open Sea	NA	NA	NA	NA	0.188026	0.202713	-0.0146871	-0.103219	9.07e-06	0.538462	0	0.194639	0.333333	0.128205	0.0666876	0	0.0160953	2619428	0	0	15.4286	26.3333	2	3	26	48	6	17	chr9	90113993	90114054	62	+	CDS:258259	uc004ape.3	1612	DAPK1	hg19_genes_cds	146
AR_ctr	CD4 mem	chr9	90114032	90114032	1	6	52	Open Sea	NA	NA	NA	NA	0.188026	0.202713	-0.0146871	-0.103219	9.07e-06	0.538462	0	0.194639	0.333333	0.128205	0.0666876	0	0.0160953	2619428	0	0	15.4286	26.3333	2	3	26	48	6	17	chr9	90113993	90114054	62	+	CDS:258274	uc004apd.3	1612	DAPK1	hg19_genes_cds	146
AR_ctr	CD4 mem	chr9	90114032	90114032	1	6	52	Open Sea	NA	NA	NA	NA	0.188026	0.202713	-0.0146871	-0.103219	9.07e-06	0.538462	0	0.194639	0.333333	0.128205	0.0666876	0	0.0160953	2619428	0	0	15.4286	26.3333	2	3	26	48	6	17	chr9	90113993	90114054	62	+	CDS:258299	uc011ltg.2	1612	DAPK1	hg19_genes_cds	146
AR_ctr	CD4 mem	chr9	90114032	90114032	1	6	52	Open Sea	NA	NA	NA	NA	0.188026	0.202713	-0.0146871	-0.103219	9.07e-06	0.538462	0	0.194639	0.333333	0.128205	0.0666876	0	0.0160953	2619428	0	0	15.4286	26.3333	2	3	26	48	6	17	chr9	90113885	90114054	170	+	5UTR:48721	uc011lth.2	1612	DAPK1	hg19_genes_5UTRs	146
AR_ctr	CD4 mem	chr9	90114032	90114032	1	6	52	Open Sea	NA	NA	NA	NA	0.188026	0.202713	-0.0146871	-0.103219	9.07e-06	0.538462	0	0.194639	0.333333	0.128205	0.0666876	0	0.0160953	2619428	0	0	15.4286	26.3333	2	3	26	48	6	17	chr9	90113885	90114054	170	+	exon:321401	uc004apc.3	1612	DAPK1	hg19_genes_exons	146
AR_ctr	CD4 mem	chr9	90114032	90114032	1	6	52	Open Sea	NA	NA	NA	NA	0.188026	0.202713	-0.0146871	-0.103219	9.07e-06	0.538462	0	0.194639	0.333333	0.128205	0.0666876	0	0.0160953	2619428	0	0	15.4286	26.3333	2	3	26	48	6	17	chr9	90113885	90114054	170	+	exon:321427	uc004ape.3	1612	DAPK1	hg19_genes_exons	146
AR_ctr	CD4 mem	chr9	90114032	90114032	1	6	52	Open Sea	NA	NA	NA	NA	0.188026	0.202713	-0.0146871	-0.103219	9.07e-06	0.538462	0	0.194639	0.333333	0.128205	0.0666876	0	0.0160953	2619428	0	0	15.4286	26.3333	2	3	26	48	6	17	chr9	90113885	90114054	170	+	exon:321443	uc004apd.3	1612	DAPK1	hg19_genes_exons	146
AR_ctr	CD4 mem	chr9	90114032	90114032	1	6	52	Open Sea	NA	NA	NA	NA	0.188026	0.202713	-0.0146871	-0.103219	9.07e-06	0.538462	0	0.194639	0.333333	0.128205	0.0666876	0	0.0160953	2619428	0	0	15.4286	26.3333	2	3	26	48	6	17	chr9	90113885	90114054	170	+	exon:321468	uc011ltg.2	1612	DAPK1	hg19_genes_exons	146
AR_ctr	CD4 mem	chr9	90114032	90114032	1	6	52	Open Sea	NA	NA	NA	NA	0.188026	0.202713	-0.0146871	-0.103219	9.07e-06	0.538462	0	0.194639	0.333333	0.128205	0.0666876	0	0.0160953	2619428	0	0	15.4286	26.3333	2	3	26	48	6	17	chr9	90113885	90114054	170	+	exon:321492	uc011lth.2	1612	DAPK1	hg19_genes_exons	146
AR_ctr	CD4 mem	chr9	90114032	90114032	1	6	52	Open Sea	NA	NA	NA	NA	0.188026	0.202713	-0.0146871	-0.103219	9.07e-06	0.538462	0	0.194639	0.333333	0.128205	0.0666876	0	0.0160953	2619428	0	0	15.4286	26.3333	2	3	26	48	6	17	chr9	90113885	90114054	170	+	firstexon:34908	uc011ltg.2	1612	DAPK1	hg19_genes_firstexons	146
AR_ctr	CD4 mem	chr9	90114032	90114032	1	6	52	Open Sea	NA	NA	NA	NA	0.188026	0.202713	-0.0146871	-0.103219	9.07e-06	0.538462	0	0.194639	0.333333	0.128205	0.0666876	0	0.0160953	2619428	0	0	15.4286	26.3333	2	3	26	48	6	17	chr9	90113885	90114054	170	+	firstexon:34909	uc011lth.2	1612	DAPK1	hg19_genes_firstexons	146
AR_ctr	CD4 mem	chr9	90114032	90114032	1	6	52	Open Sea	NA	NA	NA	NA	0.188026	0.202713	-0.0146871	-0.103219	9.07e-06	0.538462	0	0.194639	0.333333	0.128205	0.0666876	0	0.0160953	2619428	0	0	15.4286	26.3333	2	3	26	48	6	17	chr9	90113854	90114253	400	+	exonintronboundary:301771	uc004apc.3	1612	DAPK1	hg19_genes_exonintronboundaries	146
AR_ctr	CD4 mem	chr9	90114032	90114032	1	6	52	Open Sea	NA	NA	NA	NA	0.188026	0.202713	-0.0146871	-0.103219	9.07e-06	0.538462	0	0.194639	0.333333	0.128205	0.0666876	0	0.0160953	2619428	0	0	15.4286	26.3333	2	3	26	48	6	17	chr9	90113854	90114253	400	+	exonintronboundary:301772	uc004ape.3	1612	DAPK1	hg19_genes_exonintronboundaries	146
AR_ctr	CD4 mem	chr9	90114032	90114032	1	6	52	Open Sea	NA	NA	NA	NA	0.188026	0.202713	-0.0146871	-0.103219	9.07e-06	0.538462	0	0.194639	0.333333	0.128205	0.0666876	0	0.0160953	2619428	0	0	15.4286	26.3333	2	3	26	48	6	17	chr9	90113854	90114253	400	+	exonintronboundary:301773	uc004apd.3	1612	DAPK1	hg19_genes_exonintronboundaries	146
AR_ctr	CD4 mem	chr9	90114032	90114032	1	6	52	Open Sea	NA	NA	NA	NA	0.188026	0.202713	-0.0146871	-0.103219	9.07e-06	0.538462	0	0.194639	0.333333	0.128205	0.0666876	0	0.0160953	2619428	0	0	15.4286	26.3333	2	3	26	48	6	17	chr9	90113854	90114253	400	+	exonintronboundary:301774	uc011ltg.2	1612	DAPK1	hg19_genes_exonintronboundaries	146
AR_ctr	CD4 mem	chr9	90114032	90114032	1	6	52	Open Sea	NA	NA	NA	NA	0.188026	0.202713	-0.0146871	-0.103219	9.07e-06	0.538462	0	0.194639	0.333333	0.128205	0.0666876	0	0.0160953	2619428	0	0	15.4286	26.3333	2	3	26	48	6	17	chr9	90113854	90114253	400	+	exonintronboundary:301775	uc011lth.2	1612	DAPK1	hg19_genes_exonintronboundaries	146
AR_ctr	CD4 mem	chr9	90114032	90114032	1	6	52	Open Sea	NA	NA	NA	NA	0.188026	0.202713	-0.0146871	-0.103219	9.07e-06	0.538462	0	0.194639	0.333333	0.128205	0.0666876	0	0.0160953	2619428	0	0	15.4286	26.3333	2	3	26	48	6	17	chr9	90113818	90115817	2000	*	shore:21706	NA	NA	NA	hg19_cpg_shores	146
AR_ctr	CD4 mem	chr21	45670602	45670602	1	3	66	Open Sea	NA	NA	NA	NA	0.879449	0.847083	0.0323666	0.053478	9.09e-06	1	0.724138	0.105944	0.97619	0.548387	0.100238	0	0.0161288	2391756	0	0	25.7143	34.8889	11	8	35	57	7	17	chr21	45668995	45670692	1698	-	intron:589807	uc002zeg.2	29947	DNMT3L	hg19_genes_introns	35117
AR_ctr	CD4 mem	chr21	45670602	45670602	1	3	66	Open Sea	NA	NA	NA	NA	0.879449	0.847083	0.0323666	0.053478	9.09e-06	1	0.724138	0.105944	0.97619	0.548387	0.100238	0	0.0161288	2391756	0	0	25.7143	34.8889	11	8	35	57	7	17	chr21	45668995	45670692	1698	-	intron:589818	uc002zeh.2	29947	DNMT3L	hg19_genes_introns	35117
AR_ctr	CD4 mem	chr21	45670602	45670602	1	3	66	Open Sea	NA	NA	NA	NA	0.879449	0.847083	0.0323666	0.053478	9.09e-06	1	0.724138	0.105944	0.97619	0.548387	0.100238	0	0.0161288	2391756	0	0	25.7143	34.8889	11	8	35	57	7	17	chr21	45670494	45670893	400	-	exonintronboundary:621492	uc002zeg.2	29947	DNMT3L	hg19_genes_exonintronboundaries	35117
AR_ctr	CD4 mem	chr21	45670602	45670602	1	3	66	Open Sea	NA	NA	NA	NA	0.879449	0.847083	0.0323666	0.053478	9.09e-06	1	0.724138	0.105944	0.97619	0.548387	0.100238	0	0.0161288	2391756	0	0	25.7143	34.8889	11	8	35	57	7	17	chr21	45670494	45670893	400	-	exonintronboundary:621493	uc002zeh.2	29947	DNMT3L	hg19_genes_exonintronboundaries	35117
AR_ctr	CD4 mem	chr21	45670602	45670602	1	3	66	Open Sea	NA	NA	NA	NA	0.879449	0.847083	0.0323666	0.053478	9.09e-06	1	0.724138	0.105944	0.97619	0.548387	0.100238	0	0.0161288	2391756	0	0	25.7143	34.8889	11	8	35	57	7	17	chr21	45667173	45674290	7118	*	inter:18463	NA	NA	NA	hg19_cpg_inter	35117
AR_ctr	CD4 mem	chr6	10848427	10848427	1	4	47	Open Sea	NA	NA	NA	NA	0.916228	0.900824	0.0154038	0.0241947	9.12e-06	1	0.825	0.0723268	0.96875	0.765625	0.0590186	0	0.0161761	2907300	0	0	43.1429	58.2222	22	18	65	103	7	18	chr6	10770438	10851792	81355	+	intron:202199	uc010jos.1	81853	TMEM14B	hg19_genes_introns	38635
AR_ctr	CD4 mem	chr6	10848427	10848427	1	4	47	Open Sea	NA	NA	NA	NA	0.916228	0.900824	0.0154038	0.0241947	9.12e-06	1	0.825	0.0723268	0.96875	0.765625	0.0590186	0	0.0161761	2907300	0	0	43.1429	58.2222	22	18	65	103	7	18	chr6	10749932	10891745	141814	+	intron:202202	uc011dim.1	221711	SYCP2L	hg19_genes_introns	38635
AR_ctr	CD4 mem	chr6	10848427	10848427	1	4	47	Open Sea	NA	NA	NA	NA	0.916228	0.900824	0.0154038	0.0241947	9.12e-06	1	0.825	0.0723268	0.96875	0.765625	0.0590186	0	0.0161761	2907300	0	0	43.1429	58.2222	22	18	65	103	7	18	chr6	10842916	10877846	34931	*	inter:5859	NA	NA	NA	hg19_cpg_inter	38635
AR_ctr	CD4 mem	chr16	1542813	1542813	1	3	56	Open Sea	NA	NA	NA	NA	0.866268	0.73949	0.126777	0.225462	9.27e-06	1	0.611111	0.13902	0.933333	0.538462	0.111754	0	0.0164072	1167509	0	0	11.8571	16.1667	2	3	18	34	5	16	chr16	1542352	1543351	1000	+	promoter:57014	uc010uvg.1	9894	TELO2	hg19_genes_promoters	537
AR_ctr	CD4 mem	chr16	1542813	1542813	1	3	56	Open Sea	NA	NA	NA	NA	0.866268	0.73949	0.126777	0.225462	9.27e-06	1	0.611111	0.13902	0.933333	0.538462	0.111754	0	0.0164072	1167509	0	0	11.8571	16.1667	2	3	18	34	5	16	chr16	1542352	1543351	1000	+	promoter:57015	uc002cly.3	9894	TELO2	hg19_genes_promoters	537
AR_ctr	CD4 mem	chr16	1542813	1542813	1	3	56	Open Sea	NA	NA	NA	NA	0.866268	0.73949	0.126777	0.225462	9.27e-06	1	0.611111	0.13902	0.933333	0.538462	0.111754	0	0.0164072	1167509	0	0	11.8571	16.1667	2	3	18	34	5	16	chr16	1539469	1543468	4000	-	1to5kb:58793	uc010uvf.2	390667	PTX4	hg19_genes_1to5kb	537
AR_ctr	CD4 mem	chr16	1542813	1542813	1	3	56	Open Sea	NA	NA	NA	NA	0.866268	0.73949	0.126777	0.225462	9.27e-06	1	0.611111	0.13902	0.933333	0.538462	0.111754	0	0.0164072	1167509	0	0	11.8571	16.1667	2	3	18	34	5	16	chr16	1541099	1543098	2000	*	shore:34343	NA	NA	NA	hg19_cpg_shores	537
[truncated: 2,485 more rows]

## Sheet: Info sheet
Table header	Explaination
[truncated: 53 more rows]
